# Supplementary material
Source: publisher figshare collection journal article supplement (https://acs.figshare.com/ndownloader/files/5318785)
Supplement: Supplementary file 1 [file 5318785]

 
data_TTFPb2I5
 
_audit_creation_method            'SHELXL-2014/7'
_shelx_SHELXL_version_number      '2014/7'
_chemical_name_systematic         ?
_chemical_name_common             ?
_chemical_melting_point           ?
_chemical_formula_moiety          ?
_chemical_formula_sum
 'C6 I5 Pb2 S4' 
_chemical_formula_weight          1249.18

loop_
 _atom_type_symbol
 _atom_type_description
 _atom_type_scat_dispersion_real
 _atom_type_scat_dispersion_imag
 _atom_type_scat_source
 'Pb'  'Pb'  -3.3944  10.1111
 'International Tables Vol C Tables 4.2.6.8 and 6.1.1.4'
 'I'  'I'  -0.4742   1.8119
 'International Tables Vol C Tables 4.2.6.8 and 6.1.1.4'
 'C'  'C'   0.0033   0.0016
 'International Tables Vol C Tables 4.2.6.8 and 6.1.1.4'
 'S'  'S'   0.1246   0.1234
 'International Tables Vol C Tables 4.2.6.8 and 6.1.1.4'
 
_space_group_crystal_system       monoclinic
_space_group_IT_number            14
_space_group_name_H-M_alt         'P 21/c'
_space_group_name_Hall            '-P 2ybc'
 
_shelx_space_group_comment
;
The symmetry employed for this shelxl refinement is uniquely defined
by the following loop, which should always be used as a source of
symmetry information in preference to the above space-group names.
They are only intended as comments.
;
 
loop_
 _space_group_symop_operation_xyz
 'x, y, z'
 '-x, y+1/2, -z+1/2'
 '-x, -y, -z'
 'x, -y-1/2, z-1/2'
 
_cell_length_a                    12.90(3)
_cell_length_b                    7.972(10)
_cell_length_c                    20.23(2)
_cell_angle_alpha                 90
_cell_angle_beta                  100.25(7)
_cell_angle_gamma                 90
_cell_volume                      2048(6)
_cell_formula_units_Z             4
_cell_measurement_temperature     299(2)
_cell_measurement_reflns_used     ?
_cell_measurement_theta_min       ?
_cell_measurement_theta_max       ?
 
_exptl_crystal_description        block
_exptl_crystal_colour             red
_exptl_crystal_density_meas       ?
_exptl_crystal_density_method     ?
_exptl_crystal_density_diffrn     4.051          
_exptl_crystal_F_000              2116
_exptl_transmission_factor_min    ?
_exptl_transmission_factor_max    ?
_exptl_crystal_size_max           0.05
_exptl_crystal_size_mid           0.05
_exptl_crystal_size_min           0.025
_exptl_absorpt_coefficient_mu     24.344
_shelx_estimated_absorpt_T_min    ?
_shelx_estimated_absorpt_T_max    ?
_exptl_absorpt_correction_type    'multi-scan'
_exptl_absorpt_correction_T_min   0.308
_exptl_absorpt_correction_T_max   0.544
_exptl_absorpt_process_details    'SADABS'
_exptl_absorpt_special_details    ?
_diffrn_ambient_temperature       299(2)
_diffrn_radiation_wavelength      0.71073
_diffrn_radiation_type            MoK\a
_diffrn_source                    ?
_diffrn_measurement_device_type   'Bruker KAPPA APEX II'
_diffrn_measurement_method        'omega-scan'
_diffrn_detector_area_resol_mean  ?
_diffrn_reflns_number             13229
_diffrn_reflns_av_unetI/netI      0.1893
_diffrn_reflns_av_R_equivalents   0.1371
_diffrn_reflns_limit_h_min        -16
_diffrn_reflns_limit_h_max        15
_diffrn_reflns_limit_k_min        -9
_diffrn_reflns_limit_k_max        8
_diffrn_reflns_limit_l_min        -25
_diffrn_reflns_limit_l_max        25
_diffrn_reflns_theta_min          1.604
_diffrn_reflns_theta_max          26.371
_diffrn_reflns_theta_full         25.242
_diffrn_measured_fraction_theta_max   0.988
_diffrn_measured_fraction_theta_full  1.000
_diffrn_reflns_Laue_measured_fraction_max    0.988
_diffrn_reflns_Laue_measured_fraction_full   1.000
_diffrn_reflns_point_group_measured_fraction_max   0.988
_diffrn_reflns_point_group_measured_fraction_full  1.000
_reflns_number_total              4124
_reflns_number_gt                 1688
_reflns_threshold_expression      'I > 2\s(I)'
_reflns_Friedel_coverage          0.000
_reflns_Friedel_fraction_max      .
_reflns_Friedel_fraction_full     .
 
_reflns_special_details
;
 Reflections were merged by SHELXL according to the crystal
 class for the calculation of statistics and refinement.
 
 _reflns_Friedel_fraction is defined as the number of unique
 Friedel pairs measured divided by the number that would be
 possible theoretically, ignoring centric projections and
 systematic absences.
;
 
_computing_data_collection        ?
_computing_cell_refinement        ?
_computing_data_reduction         ?
_computing_structure_solution     ?
_computing_structure_refinement 'SHELXL-2014/7 (Sheldrick, 2014)'
_computing_molecular_graphics     ?
_computing_publication_material   ?
_refine_special_details           ?
_refine_ls_structure_factor_coef  Fsqd
_refine_ls_matrix_type            full
_refine_ls_weighting_scheme       calc
_refine_ls_weighting_details
'w=1/[\s^2^(Fo^2^)+(0.0204P)^2^] where P=(Fo^2^+2Fc^2^)/3'
_atom_sites_solution_primary      ?
_atom_sites_solution_secondary    ?
_atom_sites_solution_hydrogens    .
_refine_ls_hydrogen_treatment     undef
_refine_ls_extinction_method      none
_refine_ls_extinction_coef        .
_refine_ls_number_reflns          4124
_refine_ls_number_parameters      154
_refine_ls_number_restraints      0
_refine_ls_R_factor_all           0.2030
_refine_ls_R_factor_gt            0.0643
_refine_ls_wR_factor_ref          0.1195
_refine_ls_wR_factor_gt           0.0872
_refine_ls_goodness_of_fit_ref    0.945
_refine_ls_restrained_S_all       0.945
_refine_ls_shift/su_max           0.000
_refine_ls_shift/su_mean          0.000
 
loop_
 _atom_site_label
 _atom_site_type_symbol
 _atom_site_fract_x
 _atom_site_fract_y
 _atom_site_fract_z
 _atom_site_U_iso_or_equiv
 _atom_site_adp_type
 _atom_site_occupancy
 _atom_site_site_symmetry_order  
 _atom_site_calc_flag
 _atom_site_refinement_flags_posn
 _atom_site_refinement_flags_adp
 _atom_site_refinement_flags_occupancy
 _atom_site_disorder_assembly
 _atom_site_disorder_group
Pb1 Pb 0.03588(8) 0.73191(15) 0.06066(5) 0.0369(3) Uani 1 1 d . . . . .
Pb2 Pb 0.11467(8) 1.22979(14) 0.17966(5) 0.0358(3) Uani 1 1 d . . . . .
I1 I -0.04026(16) 0.9057(2) 0.18908(10) 0.0489(5) Uani 1 1 d . . . . .
I4 I -0.10424(13) 0.4041(2) 0.07546(9) 0.0387(5) Uani 1 1 d . . . . .
I5 I 0.15817(12) 1.0709(2) 0.04173(9) 0.0328(5) Uani 1 1 d . . . . .
I6 I 0.23717(14) 0.5563(2) 0.14130(9) 0.0423(5) Uani 1 1 d . . . . .
I7 I 0.30998(15) 1.0719(3) 0.25431(10) 0.0615(7) Uani 1 1 d . . . . .
S4 S 0.6242(5) 0.2656(9) 1.0058(3) 0.0434(18) Uani 1 1 d . . . . .
S3 S 0.3219(5) 0.0770(10) 0.9012(3) 0.0468(19) Uani 1 1 d . . . . .
S5 S 0.5357(5) 0.0663(9) 0.8684(3) 0.0444(19) Uani 1 1 d . . . . .
C6 C 0.336(3) -0.031(3) 0.8280(12) 0.058(9) Uani 1 1 d . . . . .
S1 S 0.4103(5) 0.2818(9) 1.0365(3) 0.0450(18) Uani 1 1 d . . . . .
C10 C 0.5063(18) 0.387(3) 1.0922(13) 0.047(8) Uani 1 1 d . . . . .
C9 C 0.6043(19) 0.381(3) 1.0803(13) 0.042(7) Uani 1 1 d . . . . .
C11 C 0.493(2) 0.215(3) 0.9835(13) 0.042(7) Uani 1 1 d . . . . .
C13 C 0.4553(18) 0.127(3) 0.9226(13) 0.038(7) Uani 1 1 d . . . . .
C12 C 0.434(2) -0.033(3) 0.8103(12) 0.049(8) Uani 1 1 d . . . . .
 
loop_
 _atom_site_aniso_label
 _atom_site_aniso_U_11
 _atom_site_aniso_U_22
 _atom_site_aniso_U_33
 _atom_site_aniso_U_23
 _atom_site_aniso_U_13
 _atom_site_aniso_U_12
Pb1 0.0383(6) 0.0327(7) 0.0387(6) 0.0010(5) 0.0035(5) -0.0021(5)
Pb2 0.0355(6) 0.0396(7) 0.0321(6) -0.0001(6) 0.0052(5) 0.0006(5)
I1 0.0579(12) 0.0514(11) 0.0416(10) -0.0013(13) 0.0201(9) -0.0175(13)
I4 0.0302(10) 0.0450(12) 0.0411(11) -0.0020(10) 0.0071(9) -0.0052(9)
I5 0.0299(11) 0.0357(11) 0.0340(10) -0.0050(9) 0.0093(8) -0.0068(8)
I6 0.0376(11) 0.0446(12) 0.0420(11) 0.0106(10) -0.0001(9) -0.0038(9)
I7 0.0582(14) 0.0751(16) 0.0473(13) 0.0017(12) -0.0010(11) 0.0273(12)
S4 0.027(4) 0.053(5) 0.052(4) 0.001(4) 0.012(3) -0.004(4)
S3 0.038(4) 0.066(5) 0.035(4) 0.008(4) 0.004(3) 0.008(4)
S5 0.041(4) 0.057(5) 0.037(4) -0.001(4) 0.014(4) -0.002(4)
C6 0.11(3) 0.05(2) 0.012(14) 0.012(14) 0.018(17) 0.022(18)
S1 0.039(4) 0.050(5) 0.048(4) 0.000(4) 0.014(4) 0.004(4)
C10 0.022(15) 0.056(19) 0.056(19) 0.005(16) -0.011(14) -0.020(14)
C9 0.029(16) 0.045(17) 0.054(18) -0.009(15) 0.011(14) -0.002(13)
C11 0.059(19) 0.024(14) 0.045(17) 0.019(14) 0.015(15) 0.026(14)
C13 0.028(16) 0.046(18) 0.048(18) 0.033(15) 0.024(14) 0.019(13)
C12 0.040(18) 0.07(2) 0.032(16) 0.040(16) -0.001(14) -0.015(16)
 
_geom_special_details
;
 All esds (except the esd in the dihedral angle between two l.s. planes)
 are estimated using the full covariance matrix.  The cell esds are taken
 into account individually in the estimation of esds in distances, angles
 and torsion angles; correlations between esds in cell parameters are only
 used when they are defined by crystal symmetry.  An approximate (isotropic)
 treatment of cell esds is used for estimating esds involving l.s. planes.
;
 
loop_
 _geom_bond_atom_site_label_1
 _geom_bond_atom_site_label_2
 _geom_bond_distance
 _geom_bond_site_symmetry_2
 _geom_bond_publ_flag
Pb1 I6 3.140(5) . ?
Pb1 I5 3.187(4) . ?
Pb1 I4 3.222(4) . ?
Pb1 I4 3.226(4) 3_565 ?
Pb1 I1 3.247(4) . ?
Pb1 I5 3.344(5) 3_575 ?
Pb2 I7 2.977(5) . ?
Pb2 I5 3.204(4) . ?
Pb2 I6 3.211(4) 1_565 ?
Pb2 I1 3.293(4) . ?
Pb2 I1 3.294(4) 2 ?
I1 Pb2 3.294(4) 2_545 ?
I4 Pb1 3.226(4) 3_565 ?
I5 Pb1 3.344(5) 3_575 ?
I6 Pb2 3.211(4) 1_545 ?
S4 C11 1.72(3) . ?
S4 C9 1.82(2) . ?
S3 C13 1.74(2) . ?
S3 C6 1.75(3) . ?
S5 C13 1.71(2) . ?
S5 C12 1.78(3) . ?
C6 C12 1.38(3) . ?
S1 C11 1.73(2) . ?
S1 C10 1.74(2) . ?
C10 C9 1.33(3) . ?
C11 C13 1.42(3) . ?
 
loop_
 _geom_angle_atom_site_label_1
 _geom_angle_atom_site_label_2
 _geom_angle_atom_site_label_3
 _geom_angle
 _geom_angle_site_symmetry_1
 _geom_angle_site_symmetry_3
 _geom_angle_publ_flag
I6 Pb1 I5 93.39(13) . . ?
I6 Pb1 I4 90.92(13) . . ?
I5 Pb1 I4 175.63(6) . . ?
I6 Pb1 I4 88.12(11) . 3_565 ?
I5 Pb1 I4 88.05(8) . 3_565 ?
I4 Pb1 I4 92.86(9) . 3_565 ?
I6 Pb1 I1 96.57(11) . . ?
I5 Pb1 I1 87.77(9) . . ?
I4 Pb1 I1 90.98(9) . . ?
I4 Pb1 I1 173.89(6) 3_565 . ?
I6 Pb1 I5 172.00(6) . 3_575 ?
I5 Pb1 I5 81.90(12) . 3_575 ?
I4 Pb1 I5 93.91(13) . 3_575 ?
I4 Pb1 I5 85.27(11) 3_565 3_575 ?
I1 Pb1 I5 89.73(11) . 3_575 ?
I7 Pb2 I5 90.64(10) . . ?
I7 Pb2 I6 93.25(13) . 1_565 ?
I5 Pb2 I6 86.55(9) . 1_565 ?
I7 Pb2 I1 96.12(14) . . ?
I5 Pb2 I1 86.71(9) . . ?
I6 Pb2 I1 168.50(6) 1_565 . ?
I7 Pb2 I1 96.48(11) . 2 ?
I5 Pb2 I1 172.75(6) . 2 ?
I6 Pb2 I1 94.38(10) 1_565 2 ?
I1 Pb2 I1 91.17(9) . 2 ?
Pb1 I1 Pb2 90.87(10) . . ?
Pb1 I1 Pb2 129.53(10) . 2_545 ?
Pb2 I1 Pb2 130.38(8) . 2_545 ?
Pb1 I4 Pb1 87.14(9) . 3_565 ?
Pb1 I5 Pb2 93.63(8) . . ?
Pb1 I5 Pb1 98.10(12) . 3_575 ?
Pb2 I5 Pb1 97.23(10) . 3_575 ?
Pb1 I6 Pb2 95.15(13) . 1_545 ?
C11 S4 C9 93.4(12) . . ?
C13 S3 C6 94.3(14) . . ?
C13 S5 C12 95.3(13) . . ?
C12 C6 S3 118(2) . . ?
C11 S1 C10 95.9(13) . . ?
C9 C10 S1 117(2) . . ?
C10 C9 S4 117(2) . . ?
C13 C11 S4 121.0(19) . . ?
C13 C11 S1 122(2) . . ?
S4 C11 S1 117.0(16) . . ?
C11 C13 S5 122.6(19) . . ?
C11 C13 S3 120.0(18) . . ?
S5 C13 S3 117.4(16) . . ?
C6 C12 S5 115(2) . . ?
 
_refine_diff_density_max    1.695
_refine_diff_density_min   -1.591
_refine_diff_density_rms    0.382

_shelx_res_file
;

    ttfpbI2metathesis_0m.res created by SHELXL-2014/7

TITL ttfpbI2metathesis_01 in P2(1)/c
CELL 0.71073  12.90290   7.97220  20.23360  90.0000 100.2522  90.0000
ZERR    4.00   0.02770   0.00970   0.02420   0.0000   0.0652   0.0000
LATT 1
SYMM -X, 0.5+Y, 0.5-Z
SFAC Pb I  C  S
UNIT 8  20  24  16
L.S. 20
SHEL 100 0.8
ACTA
BOND
FMAP 2
PLAN 20
TEMP 25.880
WGHT    0.020400
FVAR       0.08813
MOLE 1
PB1   1    0.035881    0.731913    0.060658    11.00000    0.03826    0.03268 =
         0.03866    0.00100    0.00350   -0.00214
PB2   1    0.114672    1.229795    0.179660    11.00000    0.03549    0.03955 =
         0.03206   -0.00014    0.00522    0.00062
I1    2   -0.040256    0.905737    0.189079    11.00000    0.05792    0.05136 =
         0.04161   -0.00126    0.02012   -0.01749
I4    2   -0.104238    0.404117    0.075459    11.00000    0.03016    0.04497 =
         0.04114   -0.00198    0.00713   -0.00520
I5    2    0.158173    1.070928    0.041726    11.00000    0.02991    0.03570 =
         0.03398   -0.00502    0.00932   -0.00681
I6    2    0.237167    0.556312    0.141304    11.00000    0.03763    0.04456 =
         0.04196    0.01057   -0.00014   -0.00384
I7    2    0.309976    1.071900    0.254309    11.00000    0.05817    0.07510 =
         0.04730    0.00167   -0.00101    0.02726
S4    4    0.624168    0.265568    1.005785    11.00000    0.02721    0.05317 =
         0.05157    0.00150    0.01167   -0.00416
S3    4    0.321921    0.076978    0.901240    11.00000    0.03821    0.06642 =
         0.03492    0.00773    0.00401    0.00834
S5    4    0.535670    0.066300    0.868417    11.00000    0.04120    0.05723 =
         0.03728   -0.00137    0.01372   -0.00160
C6    3    0.336319   -0.030825    0.827950    11.00000    0.11421    0.05057 =
         0.01156    0.01226    0.01754    0.02156
S1    4    0.410261    0.281806    1.036450    11.00000    0.03908    0.04996 =
         0.04810    0.00011    0.01384    0.00403
C10   3    0.506318    0.387236    1.092245    11.00000    0.02168    0.05552 =
         0.05622    0.00519   -0.01133   -0.01976
C9    3    0.604299    0.380905    1.080262    11.00000    0.02930    0.04489 =
         0.05437   -0.00929    0.01098   -0.00203
C11   3    0.493420    0.214825    0.983472    11.00000    0.05882    0.02375 =
         0.04459    0.01860    0.01457    0.02586
C13   3    0.455252    0.127470    0.922571    11.00000    0.02811    0.04559 =
         0.04755    0.03269    0.02416    0.01856
C12   3    0.434487   -0.032977    0.810322    11.00000    0.03999    0.07195 =
         0.03209    0.03957   -0.00121   -0.01452
HKLF 4

REM  ttfpbI2metathesis_01 in P2(1)/c
REM R1 =  0.0643 for    1688 Fo > 4sig(Fo)  and  0.2030 for all    4124 data
REM    154 parameters refined using      0 restraints

END

WGHT      0.0184      0.0000

REM Highest difference peak  1.695,  deepest hole -1.591,  1-sigma level  0.382
Q1    1  -0.0173  0.9185  0.0585  11.00000  0.05    1.69
Q2    1   0.2653  0.2486  0.9522  11.00000  0.05    1.52
Q3    1   0.0000  1.0000  0.0000  10.50000  0.05    1.45
Q4    1   0.3025  0.7789  0.2105  11.00000  0.05    1.45
Q5    1   0.5610  0.4450  1.1667  11.00000  0.05    1.40
Q6    1   0.5863 -0.1137  0.9048  11.00000  0.05    1.37
Q7    1   0.1210  1.3745  0.2391  11.00000  0.05    1.37
Q8    1   0.0402  0.8711  0.1781  11.00000  0.05    1.36
Q9    1   0.2847 -0.2798  0.8197  11.00000  0.05    1.34
Q10   1  -0.0705  0.7350  0.1894  11.00000  0.05    1.33
Q11   1  -0.0193  1.3187  0.1565  11.00000  0.05    1.33
Q12   1   0.2026  0.6936  0.1908  11.00000  0.05    1.32
Q13   1   0.1990  0.0401  0.9155  11.00000  0.05    1.30
Q14   1  -0.0461  0.7663  0.2409  11.00000  0.05    1.30
Q15   1   0.4755  0.3788  1.1521  11.00000  0.05    1.28
Q16   1  -0.2195  0.3933  0.0603  11.00000  0.05    1.27
Q17   1   0.4824  0.5154  1.1276  11.00000  0.05    1.25
Q18   1   0.3429  0.3455  0.1728  11.00000  0.05    1.25
Q19   1  -0.0409  0.7742  0.0826  11.00000  0.05    1.24
Q20   1   0.2091  1.3048  0.2871  11.00000  0.05    1.23
;
_shelx_res_checksum   74792

_shelx_hkl_file
;
   1   0   0 3083.62 161.567   1
   1   0   0 3132.34 161.682   3
  -1   0   0 3159.58 161.556   1
  -1   0   0 3056.01 161.685   3
   2   0   0 397.112 27.5873   1
   2   0   0 418.823 25.5751   2
  -2   0   0 395.457 27.3611   1
  -2   0   0 422.099 28.0914   3
   2   0   0 424.830 28.3668   3
   3   0   0 49.2743 15.4618   1
  -3   0   0 52.2577 14.6741   1
  -3   0   0 54.7936 14.2923   3
   3   0   0 72.8387 15.0771   3
   3   0   0 73.0538 14.6517   2
  -4   0   0 157.823 18.4897   3
  -4   0   0 127.255 17.4627   1
   4   0   0 150.682 17.7427   1
   4   0   0 112.868 18.7948   2
   4   0   0 173.151 19.0996   3
   5   0   0 551.014 36.0566   2
  -5   0   0 499.311 39.5364   3
   5   0   0 510.415 38.4052   1
   6   0   0 3.98722 11.5312   2
  -6   0   0 -20.260 15.2514   3
   6   0   0 -34.108 16.0002   1
  -7   0   0 64.1729 19.2192   3
   7   0   0 61.7853 20.3504   1
   7   0   0 86.1201 12.0607   2
  -8   0   0 88.6422 22.8873   3
   8   0   0 104.619 11.1909   2
  -9   0   0 86.2677 23.5369   3
 -10   0   0 21.1708 22.8809   3
 -11   0   0 352.759 40.2506   3
 -12   0   0 162.244 34.8290   3
 -13   0   0 39.6562 32.1946   3
 -14   0   0 455.237 53.3016   3
 -15   0   0 218.241 43.8440   3
   0  -1   0 -15.904 10.3721   2
   0  -1   0 0.15461 5.89973   1
   0   1   0 6.73892 5.87158   1
   1  -1   0 264.936 17.5538   1
  -1  -1   0 181.207 17.0850   2
   1  -1   0 204.883 16.5837   3
  -1   1   0 238.331 17.8257   1
  -1   1   0 205.005 16.4195   3
  -2  -1   0 125.031 12.9624   2
  -2  -1   0 103.863 17.1435   3
   2  -1   0 122.199 14.5174   3
   2  -1   0 113.416 14.9881   1
  -2   1   0 96.7880 15.0255   3
  -2   1   0 106.775 14.2587   1
   2   1   0 102.864 12.7515   2
   3  -1   0 43.2056 14.3917   3
   3  -1   0 62.4269 16.5026   1
  -3  -1   0 25.8079 15.6768   3
  -3  -1   0 13.9686 9.93435   2
  -3  -1   0 17.6113 11.4651   1
   3   1   0 26.4917 10.2960   2
  -3   1   0 37.6321 14.6176   3
   3   1   0 -21.191 15.5915   3
  -3   1   0 43.3230 15.1190   1
  -4  -1   0 44.3843 16.2954   3
  -4  -1   0 56.5406 14.3556   1
   4  -1   0 12.6832 15.1854   3
   4  -1   0 55.3690 16.8112   1
  -4  -1   0 59.0074 11.0972   2
  -4   1   0 68.4941 16.0726   3
  -4   1   0 36.7846 15.8519   1
   4   1   0 34.9745 16.9859   3
   4   1   0 42.7030 10.0853   2
  -5  -1   0 1011.71 53.9029   2
  -5  -1   0 876.741 58.4926   3
   5  -1   0 946.931 57.0227   1
  -5   1   0 836.174 56.8831   3
   5   1   0 893.359 50.8122   2
  -6  -1   0 1144.21 71.1470   3
   6  -1   0 1185.57 69.6827   1
  -6  -1   0 1143.36 65.3946   2
   6  -1   0 1136.58 65.4014   2
  -6   1   0 1139.90 70.5924   3
   6   1   0 1195.76 63.0311   2
  -7  -1   0 140.631 22.6961   3
  -7  -1   0 128.101 13.2165   2
   7  -1   0 97.5423 20.3185   1
   7  -1   0 111.671 16.6558   2
   7   1   0 135.422 11.7371   2
  -7   1   0 133.512 22.2187   3
   8  -1   0 21.2113 15.5462   2
  -8  -1   0 27.5535 20.0934   3
   8  -1   0 44.9389 18.1783   1
  -8   1   0 30.0781 19.9174   3
   9  -1   0 122.624 27.5378   1
  -9  -1   0 97.9567 25.1378   3
   9  -1   0 135.950 22.5224   2
  -9   1   0 95.9348 25.1498   3
 -10  -1   0 39.2323 24.2961   3
  10  -1   0 20.7144 22.7747   1
  10  -1   0 22.6837 9.96736   2
 -10   1   0 20.1082 23.4503   3
 -11  -1   0 15.5283 26.5937   3
 -11   1   0 -7.2930 23.6395   3
 -12  -1   0 -7.7525 27.4573   3
 -12   1   0 -35.187 26.6063   3
 -13  -1   0 -21.604 29.1404   3
 -13   1   0 -22.757 29.2993   3
 -14  -1   0 54.8002 35.3697   3
 -14   1   0 115.877 37.6343   3
 -15  -1   0 -36.297 34.2242   3
 -15   1   0 2.26691 35.8467   3
   0  -2   0 43.3365 10.8712   1
   0  -2   0 38.9918 18.2221   2
   0   2   0 57.7405 11.1816   1
   1  -2   0 709.233 41.6125   1
  -1  -2   0 691.863 46.7332   2
  -1  -2   0 722.322 42.4290   1
   1  -2   0 697.357 44.2652   3
  -1   2   0 721.525 42.3546   1
  -1   2   0 709.629 43.8684   3
  -2  -2   0 1666.36 91.3065   2
   2  -2   0 1610.56 89.7506   1
   2  -2   0 1653.47 91.5834   3
  -2   2   0 1682.92 89.8761   1
  -2   2   0 1659.28 91.7358   3
   3  -2   0 97.4983 16.9224   3
   3  -2   0 113.449 16.5123   1
  -3  -2   0 65.5478 20.0010   3
  -3  -2   0 78.8787 15.4995   2
  -3   2   0 98.2414 16.5500   1
  -3   2   0 89.6497 17.8027   3
   4  -2   0 253.610 23.7623   1
  -4  -2   0 232.915 25.4790   3
  -4  -2   0 170.550 19.0021   2
   4  -2   0 235.431 22.5871   3
  -4   2   0 263.641 24.1559   3
  -4   2   0 206.406 25.6025   1
   4   2   0 191.682 19.4510   2
   5  -2   0 -9.0545 16.8298   1
  -5  -2   0 9.27214 12.2639   2
  -5  -2   0 9.60337 18.1264   3
  -5   2   0 -7.9083 17.3597   3
   5   2   0 -3.5664 11.2096   2
   6  -2   0 25.8383 18.1136   1
  -6  -2   0 11.9278 11.9958   2
  -6  -2   0 55.8099 20.2961   3
  -6   2   0 31.2222 18.7553   3
   6   2   0 27.9454 11.2534   2
   7  -2   0 -18.356 18.3476   1
  -7  -2   0 0.44221 18.6931   3
  -7  -2   0 10.9585 13.7888   2
  -7   2   0 -1.7439 19.8938   3
   7   2   0 -5.9031 9.74412   2
  -8  -2   0 127.182 26.5326   3
   8  -2   0 170.072 25.3862   1
  -8  -2   0 164.668 22.8588   2
  -8   2   0 169.076 27.6614   3
  -9  -2   0 13.4423 13.8060   2
  -9  -2   0 9.85678 23.6106   3
   9  -2   0 4.02627 18.5270   2
   9  -2   0 18.2583 21.0634   1
  -9   2   0 3.89945 24.0304   3
 -10  -2   0 27.5797 26.0161   3
  10  -2   0 36.7491 25.6532   1
  10  -2   0 44.3099 14.2773   2
 -10   2   0 68.3360 27.5923   3
 -11  -2   0 3.63799 26.8056   3
  11  -2   0 87.6177 28.6763   1
 -11   2   0 -46.494 25.6775   3
  12  -2   0 359.906 40.9356   1
 -12  -2   0 309.490 44.0982   3
 -12   2   0 254.287 42.1783   3
 -13  -2   0 411.322 52.3761   3
 -13   2   0 435.679 51.1431   3
 -14  -2   0 -1.5381 36.0008   3
 -14   2   0 3.13468 35.4808   3
 -15  -2   0 -48.641 34.9793   3
 -15   2   0 8.59615 35.5907   3
   0  -3   0 -11.230 11.1236   1
   0  -3   0 -47.980 17.5604   2
   0   3   0 36.9920 11.6764   1
   1  -3   0 -8.8879 13.4353   3
  -1  -3   0 17.9102 20.5507   2
   1  -3   0 -17.571 16.8479   2
   1  -3   0 -16.874 10.8835   1
  -1  -3   0 -0.7130 12.0514   1
  -1   3   0 0.75238 11.4554   1
  -2  -3   0 198.525 25.8039   2
  -2  -3   0 206.596 20.5412   1
   2  -3   0 238.033 22.9193   3
   2  -3   0 270.461 21.3441   1
  -2   3   0 264.932 21.8003   1
  -2   3   0 191.038 21.7156   3
   3  -3   0 35.2920 14.9366   1
   3  -3   0 -0.7443 15.1681   3
  -3  -3   0 2.40286 15.5566   2
  -3   3   0 20.9941 15.3279   3
  -3   3   0 -19.494 12.9296   1
  -4  -3   0 566.845 40.1219   2
  -4  -3   0 617.645 48.0525   3
   4  -3   0 554.844 39.3931   1
  -4   3   0 539.825 43.1168   3
   5  -3   0 19.9676 18.3263   1
  -5  -3   0 45.3291 15.0845   2
  -5  -3   0 54.5196 21.4032   3
  -5   3   0 41.0899 19.0213   3
   6  -3   0 1014.52 67.8251   1
  -6  -3   0 1155.70 72.4820   3
  -6  -3   0 1061.16 64.5686   2
  -6   3   0 1105.95 70.6343   3
  -7  -3   0 3433.40 189.323   2
   7  -3   0 3451.93 192.273   1
  -7  -3   0 3659.50 196.167   3
  -7   3   0 3665.25 195.491   3
   8  -3   0 1778.58 100.201   2
  -8  -3   0 1818.54 108.025   3
  -8  -3   0 1744.04 98.1035   2
   8  -3   0 1654.93 102.718   1
  -8   3   0 1712.23 107.131   3
   9  -3   0 70.1991 19.3984   2
  -9  -3   0 33.9803 28.5006   3
  -9  -3   0 107.670 21.5937   2
   9  -3   0 73.4059 24.9512   1
  -9   3   0 47.8198 28.2217   3
  10  -3   0 10.6195 25.6903   1
 -10  -3   0 39.2275 29.7120   3
  10  -3   0 7.26937 16.8686   2
 -10   3   0 55.1796 30.4916   3
 -11  -3   0 43.4873 32.3412   3
  11  -3   0 45.1991 27.1086   1
 -11   3   0 59.2847 32.7768   3
  12  -3   0 97.6773 32.4831   1
 -12  -3   0 76.7122 35.6223   3
 -12   3   0 142.257 37.7341   3
 -13  -3   0 -16.389 35.7813   3
  13  -3   0 -40.533 29.1654   1
 -13   3   0 -9.3518 34.8583   3
 -14  -3   0 54.4919 39.7417   3
 -14   3   0 155.318 43.1902   3
 -15   3   0 -40.665 39.4408   3
   0  -4   0 266.749 23.1289   1
   0   4   0 297.414 23.3416   1
  -1  -4   0 154.124 17.8648   1
   1  -4   0 156.954 17.7858   1
  -1  -4   0 156.640 26.7278   2
   1  -4   0 157.063 26.9806   2
  -1   4   0 186.864 18.9820   1
  -2  -4   0 70.9601 22.4857   2
   2  -4   0 7.96407 22.5113   2
   2  -4   0 86.7065 15.5760   1
  -2  -4   0 73.6949 15.5417   1
   3  -4   0 18.7454 14.7484   1
   3  -4   0 37.4824 21.1030   2
  -3  -4   0 47.2024 20.4826   2
  -3  -4   0 45.2728 15.3124   1
  -3   4   0 7.56930 15.7422   3
  -4  -4   0 19.4363 18.7777   2
   4  -4   0 -10.685 15.9703   1
   4  -4   0 -20.428 20.4997   2
  -4   4   0 -1.7763 16.6474   3
  -5  -4   0 -7.3127 16.9191   2
   5  -4   0 -6.9274 16.4416   1
   5  -4   0 10.2413 21.3530   2
  -5  -4   0 18.6354 22.8239   3
  -5   4   0 -19.463 18.6006   3
   6  -4   0 24.8357 22.0389   2
   6  -4   0 47.9299 19.9029   1
  -6  -4   0 7.09259 17.5336   2
  -6  -4   0 9.01755 23.8591   3
  -6   4   0 48.1580 21.9376   3
   7  -4   0 -24.164 20.0724   2
  -7  -4   0 -0.0188 17.6859   2
  -7  -4   0 -36.566 24.8577   3
   7  -4   0 30.1337 21.3265   1
  -7   4   0 -3.2022 22.5818   3
  -8  -4   0 30.8563 19.4908   2
   8  -4   0 99.2595 24.6871   2
  -8  -4   0 46.3908 28.0784   3
   8  -4   0 89.0575 25.4539   1
  -8   4   0 86.6703 28.7866   3
  -9  -4   0 2.56934 17.8432   2
   9  -4   0 7.29817 24.3972   1
   9  -4   0 -25.909 20.2471   2
  -9  -4   0 20.9008 31.3057   3
  -9   4   0 27.7989 28.7135   3
 -10  -4   0 33.0830 34.9070   3
  10  -4   0 23.9571 25.6374   1
  10  -4   0 -0.1310 19.3338   2
 -10   4   0 -27.802 29.7176   3
  11  -4   0 11.3244 27.5616   1
 -11  -4   0 30.1366 37.2110   3
 -11   4   0 44.0801 34.4368   3
 -12  -4   0 136.200 42.2567   3
  12  -4   0 140.430 34.9684   1
 -12   4   0 76.5528 39.2999   3
 -13  -4   0 50.0524 41.4169   3
  13  -4   0 43.7094 31.9743   1
 -13   4   0 142.316 43.2940   3
  14  -4   0 6.11723 32.1362   1
 -14  -4   0 9.74699 44.4010   3
 -14   4   0 47.3607 40.5432   3
   0  -5   0 -20.044 13.6290   1
   0  -5   0 37.0801 26.6329   2
  -1  -5   0 26.8736 15.5240   1
  -1  -5   0 30.6758 24.3189   2
   1  -5   0 56.1985 15.2260   1
   1  -5   0 56.9548 26.4438   2
   2  -5   0 61.3088 25.5817   2
  -2  -5   0 85.0558 17.7250   1
  -2  -5   0 103.937 27.8896   2
   2  -5   0 147.868 18.8320   1
  -3  -5   0 10.6281 16.2880   1
   3  -5   0 50.9845 24.6401   2
  -3  -5   0 62.8774 25.8784   2
   3  -5   0 46.7293 16.9340   1
  -4  -5   0 -2.0717 21.7486   2
   4  -5   0 24.4052 17.4597   1
   4  -5   0 31.1896 24.7800   2
  -4  -5   0 20.3808 17.7967   1
  -4   5   0 -0.8482 18.5721   3
  -5  -5   0 730.320 60.6975   3
   5  -5   0 704.485 50.1034   1
   5  -5   0 677.796 57.7403   2
  -5  -5   0 662.348 53.9459   2
  -5   5   0 681.212 54.0823   3
  -6  -5   0 672.610 54.1736   3
  -6  -5   0 594.282 49.8125   2
   6  -5   0 606.175 56.9001   2
   6  -5   0 618.659 48.8385   1
  -6   5   0 672.130 53.8092   3
   7  -5   0 38.5121 26.4736   2
   7  -5   0 34.4661 21.6307   1
  -7  -5   0 14.3299 28.0456   3
  -7  -5   0 25.2710 21.1629   2
  -7   5   0 31.9052 24.4181   3
   8  -5   0 -26.107 24.0597   2
   8  -5   0 7.12656 22.5423   1
  -8  -5   0 43.4335 30.5354   3
  -8  -5   0 -27.717 19.9033   2
  -8   5   0 23.4321 27.7516   3
  -9  -5   0 151.424 40.0766   3
   9  -5   0 198.048 32.3905   2
   9  -5   0 206.353 32.0552   1
  -9  -5   0 159.973 27.3935   2
  -9   5   0 168.451 36.5259   3
  10  -5   0 49.0664 26.3366   2
 -10  -5   0 50.6661 38.0264   3
  10  -5   0 30.4889 26.4101   1
 -10   5   0 39.6882 33.9069   3
 -11  -5   0 -8.2406 40.3913   3
  11  -5   0 -7.5894 28.5098   1
 -11   5   0 39.6978 36.9195   3
  12  -5   0 -73.345 28.1856   1
 -12  -5   0 -28.175 37.5303   3
 -12   5   0 -22.631 37.9678   3
 -13  -5   0 39.2974 42.4968   3
  13  -5   0 -8.0302 33.8195   1
 -13   5   0 -45.487 40.5139   3
   0  -6   0 2607.73 152.284   2
   0  -6   0 2572.14 141.326   1
  -1  -6   0 703.697 48.1309   1
  -1  -6   0 665.656 61.2837   2
   1  -6   0 697.978 62.2233   2
   1  -6   0 679.884 46.9113   1
  -2  -6   0 40.0016 18.4907   1
  -2  -6   0 74.6656 29.4954   2
   2  -6   0 61.3923 27.5209   2
   2  -6   0 63.6023 18.6409   1
   3  -6   0 -21.812 16.7743   1
   3  -6   0 -26.069 28.7320   2
  -3  -6   0 9.81043 26.5784   2
  -3  -6   0 14.9087 17.3403   1
   4  -6   0 36.2011 20.1005   1
  -4  -6   0 53.6311 29.4182   2
  -4  -6   0 14.6945 19.2138   1
   4  -6   0 72.5177 31.6167   2
  -5  -6   0 63.7160 22.5852   1
  -5  -6   0 73.1318 28.4641   2
   5  -6   0 90.4368 21.4620   1
   5  -6   0 36.7365 31.5050   2
  -5   6   0 64.5541 23.1827   3
  -6  -6   0 -3.8868 19.9461   1
   6  -6   0 -3.6184 21.0663   1
  -6  -6   0 57.3665 29.5510   3
   6  -6   0 1.44046 28.5112   2
  -6  -6   0 1.56430 24.2644   2
  -6   6   0 64.2723 24.5824   3
  -7  -6   0 26.4189 31.4139   3
  -7  -6   0 48.6742 25.0857   2
   7  -6   0 9.71077 21.5698   1
   7  -6   0 53.0459 29.4133   2
  -7   6   0 10.0717 25.1034   3
   8  -6   0 -6.5354 29.6746   2
  -8  -6   0 24.2328 23.9340   2
  -8  -6   0 12.6503 31.7965   3
   8  -6   0 -16.236 22.1550   1
  -8   6   0 -11.179 26.5929   3
   9  -6   0 6.39168 25.6786   1
  -9  -6   0 68.6791 37.1721   3
  -9  -6   0 19.8910 24.3164   2
   9  -6   0 56.0004 28.9921   2
  -9   6   0 33.5009 31.1550   3
  10  -6   0 37.5604 30.0029   2
 -10  -6   0 3.67282 37.7079   3
  10  -6   0 -15.991 25.6664   1
 -10   6   0 -0.9212 33.4567   3
  11  -6   0 110.882 31.9742   1
 -11  -6   0 30.4878 39.2952   3
 -11   6   0 36.2328 38.7942   3
  12  -6   0 -12.299 29.0980   1
 -12  -6   0 -23.914 39.0177   3
 -12   6   0 24.2300 41.8807   3
   0  -7   0 22.9967 29.9672   2
   0  -7   0 -29.257 16.1479   1
  -1  -7   0 -7.6358 17.6769   1
  -1  -7   0 23.9496 32.5010   2
   1  -7   0 -6.1300 17.4343   1
   1  -7   0 41.5572 33.6658   2
   2  -7   0 1.07593 17.7365   1
  -2  -7   0 -18.057 18.1270   1
  -2  -7   0 26.0990 32.3870   2
   2  -7   0 11.5523 32.0556   2
   3  -7   0 -24.683 18.8541   1
   3  -7   0 11.9977 31.8508   2
  -3  -7   0 36.7433 31.6941   2
  -3  -7   0 15.4750 19.6109   1
   4  -7   0 -18.344 31.4576   2
   4  -7   0 8.21877 19.3521   1
  -4  -7   0 59.7191 30.9440   2
  -4  -7   0 -11.019 18.9287   1
  -5  -7   0 3.28392 20.4228   1
  -5  -7   0 6.63451 28.4398   2
   5  -7   0 62.9986 35.7274   2
   5  -7   0 60.6430 21.8454   1
  -6  -7   0 28.0892 32.8807   3
  -6  -7   0 85.4249 30.2433   2
  -6  -7   0 18.7476 21.8240   1
   6  -7   0 65.7318 24.0752   1
   6  -7   0 8.90163 32.9801   2
  -7  -7   0 14.4605 23.5984   1
   7  -7   0 97.9243 25.0411   1
  -7  -7   0 2.51495 26.4988   2
  -7  -7   0 28.3921 34.2157   3
   7  -7   0 70.1548 34.8629   2
  -7   7   0 -6.4719 26.1901   3
   8  -7   0 13.4474 34.6783   2
  -8  -7   0 10.8813 27.4252   2
  -8  -7   0 -18.123 31.6631   3
   8  -7   0 4.84270 24.7584   1
  -8  -7   0 1.21271 23.9490   1
  -8   7   0 -38.440 26.7860   3
   9  -7   0 -1.2827 33.3741   2
  -9  -7   0 -9.1199 35.6964   3
   9  -7   0 -0.4040 24.0109   1
  -9  -7   0 0.21380 24.5133   1
  -9   7   0 -26.762 29.8584   3
  10  -7   0 -4.4147 27.7508   1
  10  -7   0 77.0981 34.4108   2
 -10  -7   0 -22.264 36.4888   3
 -11  -7   0 -66.674 49.9035   3
  11  -7   0 -7.9056 28.3100   1
   0  -8   0 38.3334 35.6304   2
   1  -8   0 36.5913 34.9722   2
  -1  -8   0 26.6459 36.5160   2
  -2  -8   0 155.617 40.5152   2
   2  -8   0 107.713 37.8794   2
   3  -8   0 23.5523 37.6989   2
  -3  -8   0 54.9537 33.1731   2
   4  -8   0 36.6435 35.6549   2
  -4  -8   0 17.8941 31.2853   2
   5  -8   0 -26.006 35.2265   2
  -5  -8   0 21.5912 31.5978   2
  -6  -8   0 -17.274 31.5763   3
  -6  -8   0 -5.4174 29.3921   2
   6  -8   0 24.3298 35.2613   2
   7  -8   0 23.0706 35.7650   2
  -7  -8   0 -18.037 34.5619   3
  -7  -8   0 -14.926 28.2767   2
  -8  -8   0 19.9773 36.7602   3
  -8  -8   0 17.2142 30.4400   2
   8  -8   0 44.0524 39.1588   2
   9  -8   0 18.1279 38.2080   2
  -9  -8   0 11.6737 39.7294   3
   0  -9   0 -5.5684 34.3654   2
   1  -9   0 -40.459 36.1102   2
  -1  -9   0 87.0593 39.6372   2
   2  -9   0 3.96212 36.3436   2
  -2  -9   0 -30.984 34.1707   2
  -3  -9   0 -85.294 32.2794   2
   3  -9   0 -1.3163 38.0616   2
   4  -9   0 64.5176 43.5798   2
  -4  -9   0 -13.172 32.0083   2
  -5  -9   0 6.01774 35.0580   2
  -5  -9   0 30.0532 36.3544   3
   5  -9   0 18.1894 40.4770   2
  -6  -9   0 22.8973 35.9772   2
  -6  -9   0 -2.2964 36.7532   3
   6  -9   0 8.00780 41.9104   2
 -15   0   1 -18.240 31.9707   3
 -14   0   1 -9.4882 31.9041   3
 -13   0   1 27.9018 31.3668   3
 -12   0   1 -10.658 26.5455   3
 -11   0   1 -14.219 23.3461   3
 -10   0   1 -9.3868 22.2208   3
   9   0  -1 -0.5747 10.5393   2
   9   0  -1 15.0978 21.5213   1
  -9   0   1 -22.265 20.2077   3
   8   0  -1 13.4689 19.8596   1
   8   0  -1 -8.5274 11.9885   2
  -8   0   1 30.9590 18.9937   3
   7   0  -1 20.0269 16.7324   1
   7   0  -1 -4.0914 13.8496   2
  -7   0   1 -5.0410 16.0350   3
  -6   0   1 -11.776 15.0809   3
   6   0  -1 5.19908 16.6315   2
   6   0  -1 -6.6418 16.6903   1
  -5   0   1 -24.014 13.9508   3
   5   0  -1 17.0174 19.2176   2
   5   0  -1 -4.0036 14.4689   1
   5   0  -1 -0.7114 15.7069   3
   4   0  -1 -7.1992 13.5402   3
  -4   0   1 3.89693 13.8729   3
   4   0  -1 -13.275 19.6413   2
  -4   0   1 -4.2802 15.0253   1
  -4   0   1 -7.8547 11.8766   2
   4   0  -1 4.53276 13.5613   1
  -3   0   1 -22.891 11.9987   1
   3   0  -1 42.8316 19.7462   2
  -3   0   1 -7.3322 12.4285   2
  -3   0   1 -0.0580 12.4989   3
   3   0  -1 -4.4476 12.1728   3
   3   0  -1 -10.837 12.2659   1
  -2   0   1 -19.126 12.1666   2
   2   0  -1 -3.6035 9.11799   1
  -2   0   1 -16.349 10.5442   1
   2   0  -1 -5.6383 14.8970   2
   2   0  -1 -3.0201 10.5357   3
  -2   0   1 3.53442 9.49879   3
   1   0  -1 -4.6292 5.87334   1
   1   0  -1 -6.6218 10.3763   2
  -1   0   1 -2.8264 5.96433   3
  -1   0   1 -26.232 9.10294   2
   0   0   1 -1.7947 2.49143   1
   0   0   1 -10.823 6.93866   2
   0   0   1 0.86985 2.84869   3
   0   0  -1 7.77380 2.90824   1
   0   0  -1 3.85098 6.38698   2
   0   0  -1 0.98403 2.86158   3
  -1   0  -1 4.95730 6.92347   3
   1   0   1 5.23147 6.66758   3
  -2   0  -1 4.29757 11.1173   3
  -2   0  -1 -2.6249 9.71559   1
   2   0   1 1.74509 11.1289   3
  -3   0  -1 -0.2421 12.3906   1
  -3   0  -1 3.03404 13.8419   3
   3   0   1 7.73619 14.4001   3
   4   0   1 17.7158 15.2525   3
  -4   0  -1 -8.5894 13.9911   1
  -4   0  -1 -6.1937 14.1939   3
  -5   0  -1 17.5449 15.1078   3
  -6   0  -1 5.81144 16.2648   3
  -7   0  -1 -12.626 16.5634   3
  -8   0  -1 -19.384 17.6864   3
  -9   0  -1 11.6388 21.5330   3
 -10   0  -1 -2.7363 23.4051   3
 -11   0  -1 -57.403 23.7817   3
 -12   0  -1 56.6180 29.7536   3
 -13   0  -1 19.8828 31.0690   3
 -14   0  -1 8.37845 31.9882   3
 -15   0  -1 -31.575 33.2619   3
 -15  -1   1 -46.170 34.0071   3
 -15   1   1 -32.076 34.4928   3
 -14  -1   1 16.3856 32.7526   3
 -14   1   1 43.4566 33.8020   3
 -13  -1   1 20.2208 30.5240   3
 -13   1   1 9.16400 29.3386   3
 -12  -1   1 31.1660 29.6779   3
 -12   1   1 28.0629 28.5608   3
  11  -1  -1 54.6989 27.5863   1
 -11  -1   1 -0.1592 26.0100   3
 -11   1   1 55.5910 26.1546   3
  10  -1  -1 209.105 31.1697   1
 -10  -1   1 236.405 33.1056   3
 -10   1   1 283.207 34.5490   3
  -9  -1   1 605.976 53.1846   3
   9  -1  -1 654.017 48.4681   2
   9  -1  -1 578.686 47.4697   1
   9   1  -1 624.206 37.3034   2
  -9   1   1 599.907 52.6275   3
  -8  -1   1 222.878 19.3350   2
   8  -1  -1 233.779 27.8206   1
  -8  -1   1 170.267 27.0141   3
   8  -1  -1 260.434 25.7931   2
  -8   1   1 196.913 27.0952   3
   8   1  -1 227.443 18.1889   2
   7  -1  -1 132.403 21.9683   1
  -7  -1   1 166.102 23.8564   3
   7  -1  -1 173.215 20.0795   2
  -7  -1   1 155.061 18.0697   2
   7   1  -1 172.091 15.5486   2
  -7   1   1 113.222 22.0643   3
   6  -1  -1 21.8126 13.9416   2
  -6  -1   1 14.6445 18.1322   2
   6  -1  -1 43.7166 17.0507   1
  -6  -1   1 14.5168 16.8032   3
  -6   1   1 18.8757 16.6464   3
   6   1  -1 -0.2345 9.59044   2
   5  -1  -1 351.820 30.0750   1
   5  -1  -1 371.114 28.6158   2
  -5  -1   1 300.670 29.0205   3
  -5  -1   1 412.208 32.8232   2
   5  -1  -1 383.044 29.2567   3
  -5   1   1 354.276 29.0247   3
   5   1  -1 336.540 25.4563   2
   4  -1  -1 32.9445 15.8530   1
  -4  -1   1 4.39453 15.7701   3
   4  -1  -1 27.6053 14.1905   3
  -4  -1   1 26.6127 13.5567   2
  -4  -1   1 -4.4057 12.8424   1
  -4   1   1 -15.392 15.6104   1
   4   1  -1 18.3234 10.9828   2
  -4   1   1 14.6075 13.4696   3
   3  -1  -1 -5.8846 15.0728   1
  -3  -1   1 -32.801 16.1284   3
  -3  -1   1 6.70411 11.1959   2
   3  -1  -1 19.6746 13.0042   3
  -3  -1   1 -2.7824 10.8525   1
   3   1  -1 -3.9384 10.9832   2
  -3   1   1 -1.6787 14.4247   1
  -3   1   1 -7.0978 12.8166   3
   2  -1  -1 7.58908 9.95881   3
  -2  -1   1 -7.1313 10.8839   2
   2  -1  -1 9.74855 12.3133   1
  -2  -1   1 4.24949 8.82806   1
  -2   1   1 -4.8906 10.8000   3
   2   1  -1 -8.0696 11.0514   2
  -2   1   1 -16.584 12.2523   1
  -1  -1   1 7.39531 10.7657   2
   1  -1  -1 -6.4913 9.43541   1
   1  -1  -1 -5.5891 8.13730   3
  -1   1   1 -11.405 9.55508   1
  -1   1   1 -1.4603 7.76887   3
   1   1  -1 -4.9352 10.3046   2
   0  -1   1 16.6858 11.3954   2
   0  -1   1 5.95099 4.58826   1
   0  -1   1 -2.8160 8.48298   3
   0  -1  -1 -4.0352 7.54856   1
   0   1   1 0.88712 7.62968   1
   0   1  -1 16.9570 11.1953   2
   0   1  -1 14.0775 4.82853   1
   1  -1   1 56.5442 9.60717   1
   1  -1   1 48.1598 12.0776   3
  -1  -1  -1 54.0501 13.1721   3
   1  -1   1 45.8051 11.9811   2
  -1   1  -1 29.0699 11.7101   2
  -1   1  -1 46.3109 12.3290   3
  -1   1  -1 40.4179 8.94640   1
   2  -1   1 52.5154 12.4169   2
   2  -1   1 34.7870 12.3483   1
  -2  -1  -1 45.6863 13.6333   3
   2  -1   1 37.3402 14.1425   3
  -2  -1  -1 36.8134 10.7932   2
   2   1   1 21.0895 13.4221   3
  -2   1  -1 49.3430 12.9178   1
  -2   1  -1 21.3914 14.0441   3
  -3  -1  -1 109.572 11.9934   2
   3  -1   1 87.2068 16.9281   3
   3  -1   1 114.729 14.4613   2
   3  -1   1 122.131 16.2824   1
  -3  -1  -1 126.242 17.3872   3
  -3   1  -1 168.680 19.2426   3
  -3   1  -1 118.105 17.1553   1
   3   1   1 83.9837 17.2567   3
  -4  -1  -1 115.990 18.2071   3
  -4  -1  -1 81.8149 15.2475   1
   4  -1   1 87.6525 17.4326   3
   4  -1   1 61.4806 16.7309   1
  -4  -1  -1 71.4631 9.93032   2
  -4   1  -1 98.6597 18.3174   3
   4   1   1 71.6038 17.1862   3
  -4   1  -1 68.7526 16.7311   1
  -5  -1  -1 834.617 44.8719   2
  -5  -1  -1 761.699 52.3411   3
   5  -1   1 740.483 51.1410   1
  -5   1  -1 778.302 52.4021   3
  -6  -1  -1 2405.42 130.791   3
   6  -1   1 2403.58 129.406   1
  -6   1  -1 2226.97 129.894   3
   7  -1   1 90.2155 22.5092   1
   7  -1   1 130.877 15.0011   2
   7  -1   1 115.049 12.7112   2
  -7  -1  -1 90.0567 21.0112   3
  -7   1  -1 86.3770 21.3900   3
   8  -1   1 74.1642 15.2191   2
   8  -1   1 50.0056 22.9537   1
   8  -1   1 74.4492 11.3169   2
  -8  -1  -1 61.9028 21.0962   3
  -8   1  -1 67.0080 21.6517   3
   9  -1   1 31.1066 16.8804   2
  -9  -1  -1 -2.2665 20.9832   3
   9  -1   1 -2.1721 8.65249   2
   9  -1   1 -21.009 21.6907   1
  -9   1  -1 33.6926 21.9216   3
 -10  -1  -1 26.6821 24.5428   3
 -10   1  -1 38.6660 24.9936   3
 -11  -1  -1 49.1759 28.6784   3
 -11   1  -1 31.2222 26.8125   3
 -12  -1  -1 1.53465 28.3877   3
 -12   1  -1 10.6648 28.9952   3
 -13  -1  -1 18.4431 32.5863   3
 -13   1  -1 31.1984 31.4494   3
 -14  -1  -1 1.83787 33.1450   3
 -14   1  -1 -28.137 31.5304   3
 -15  -1  -1 96.7196 40.1736   3
 -15   1  -1 94.5205 39.1622   3
 -15  -2   1 -5.6965 36.2220   3
 -15   2   1 -26.835 36.0897   3
 -14  -2   1 -23.594 33.9173   3
 -14   2   1 0.33397 34.7303   3
  13  -2  -1 -15.991 24.6078   1
 -13  -2   1 11.2232 33.4770   3
 -13   2   1 -22.388 31.0444   3
 -12  -2   1 7.23545 29.1056   3
  12  -2  -1 43.4259 25.5362   1
 -12   2   1 -3.4085 28.6907   3
 -11  -2   1 37.3393 27.8954   3
  11  -2  -1 28.0323 28.2961   1
 -11   2   1 34.6123 28.9172   3
  10  -2  -1 55.9626 25.4904   1
 -10  -2   1 26.2219 25.7213   3
 -10  -2   1 19.1898 13.9729   2
 -10   2   1 18.9238 25.7920   3
  -9  -2   1 7.81868 18.2760   2
  -9  -2   1 -36.596 21.6372   3
   9  -2  -1 17.8701 20.9187   1
   9   2  -1 3.65086 11.1307   2
  -9   2   1 3.69823 22.9654   3
   8  -2  -1 -22.097 20.1424   1
  -8  -2   1 -16.609 20.2870   2
  -8  -2   1 4.75609 21.3208   3
  -8   2   1 -10.832 20.9286   3
   8   2  -1 -10.847 11.0735   2
  -7  -2   1 62.2715 21.8142   3
  -7  -2   1 84.2669 18.2699   2
   7  -2  -1 39.8059 19.1595   1
   7   2  -1 42.7289 12.6435   2
  -7   2   1 46.6184 21.1952   3
  -6  -2   1 34.0196 13.8731   2
  -6  -2   1 53.8952 19.0802   3
   6  -2  -1 2.58350 18.1349   1
   6   2  -1 5.45344 11.8174   2
  -6   2   1 12.1790 17.3834   3
  -5  -2   1 19.6669 18.6856   3
  -5  -2   1 -2.9318 12.5628   2
   5  -2  -1 -3.6693 15.7062   3
   5  -2  -1 12.6342 17.1602   1
   5   2  -1 24.1423 12.7937   2
  -5   2   1 -17.492 15.4169   3
  -4  -2   1 33.4162 13.6188   2
   4  -2  -1 78.7691 17.1560   1
  -4  -2   1 52.0571 19.1258   3
   4  -2  -1 60.8972 15.1511   3
  -4  -2   1 52.6349 12.7424   1
   4   2  -1 69.4991 15.1729   2
  -4   2   1 48.1003 16.4201   3
   3  -2  -1 293.950 23.5304   3
   3  -2  -1 286.921 24.0219   1
  -3  -2   1 276.675 23.8863   2
  -3   2   1 302.631 24.6956   3
   3   2  -1 288.390 24.7325   2
  -3   2   1 302.575 24.2109   1
   2  -2  -1 3178.85 173.451   1
  -2  -2   1 3224.03 174.928   2
   2  -2  -1 3322.14 173.745   3
  -2   2   1 3329.23 173.680   1
   2   2  -1 3351.78 174.962   2
  -2   2   1 3292.22 173.671   3
  -1  -2   1 1640.13 89.4165   2
   1  -2  -1 1548.34 86.8325   1
  -1  -2   1 1560.21 85.2319   1
   1  -2  -1 1606.23 86.7325   3
   1   2  -1 1535.27 89.0754   2
  -1   2   1 1670.43 86.8762   1
   0  -2   1 22.6679 8.80287   1
   0  -2   1 24.2496 12.6850   3
   0  -2   1 0.55453 17.6074   2
   0  -2  -1 26.6799 11.5861   1
   0   2  -1 -5.0098 16.9882   2
   0   2   1 20.7106 11.3446   1
   0   2  -1 6.63234 8.80687   1
   1  -2   1 511.506 30.5165   1
   1  -2   1 449.336 35.7549   3
   1  -2   1 468.619 37.4769   2
  -1  -2  -1 452.317 32.9243   1
  -1   2  -1 504.234 35.3831   3
  -1   2  -1 474.967 30.4569   1
   2  -2   1 4.84195 15.9649   2
   2  -2   1 -10.818 14.7288   3
  -2  -2  -1 -34.620 15.9608   2
   2  -2   1 6.51022 12.2720   1
  -2   2  -1 -2.4798 15.6290   3
  -2   2  -1 -7.5314 11.6496   1
  -3  -2  -1 146.750 22.0653   3
  -3  -2  -1 148.166 18.6059   2
   3  -2   1 160.301 20.3112   2
   3  -2   1 161.510 20.3720   3
   3  -2   1 173.449 19.4716   1
  -3   2  -1 177.973 22.0358   3
  -3   2  -1 207.541 18.7818   1
   4  -2   1 28.4578 14.5266   2
   4  -2   1 17.0051 18.2137   3
  -4  -2  -1 -2.5543 17.0304   3
   4  -2   1 17.6817 15.9347   1
  -4  -2  -1 18.1113 12.5102   2
  -4   2  -1 41.5196 17.0122   3
  -4   2  -1 9.01113 16.4036   1
   5  -2   1 43.6956 14.6751   2
   5  -2   1 52.0774 17.3805   1
  -5  -2  -1 33.3850 18.4308   3
  -5  -2  -1 34.7768 12.1988   2
  -5   2  -1 35.3856 18.2978   3
  -6  -2  -1 -6.8979 10.9487   2
  -6  -2  -1 24.3211 18.2184   3
   6  -2   1 13.5987 17.8284   1
   6  -2   1 -5.5980 12.8327   2
  -6   2  -1 1.93117 18.8102   3
  -7  -2  -1 6.64534 20.1392   3
   7  -2   1 20.5531 12.9681   2
   7  -2   1 -17.756 18.3323   1
  -7  -2  -1 0.77762 11.9212   2
  -7   2  -1 8.03732 20.6013   3
   8  -2   1 7.75631 12.8982   2
  -8  -2  -1 32.5871 15.6627   2
   8  -2   1 0.95412 19.0166   1
  -8  -2  -1 25.6646 21.4861   3
  -8   2  -1 11.5565 22.5550   3
   9  -2   1 124.291 17.1438   2
  -9  -2  -1 116.446 27.4266   3
   9  -2   1 139.072 27.0238   1
   9  -2   1 177.911 24.7363   2
  -9   2  -1 94.4055 27.7811   3
  10  -2   1 46.5081 27.1801   1
 -10  -2  -1 59.7822 27.0304   3
  10  -2   1 29.3033 13.2287   2
 -10   2  -1 35.7018 27.0354   3
  11  -2   1 -9.8445 24.7462   1
 -11  -2  -1 20.4851 29.1715   3
 -11   2  -1 -17.143 27.6947   3
 -12  -2  -1 59.7513 33.7507   3
 -12   2  -1 30.9479 32.0968   3
 -13  -2  -1 64.1863 37.1020   3
 -13   2  -1 133.620 37.6910   3
 -14  -2  -1 69.1969 38.0947   3
 -14   2  -1 14.6664 35.8822   3
 -15  -2  -1 -79.580 36.1053   3
 -15   2  -1 17.5340 38.2415   3
 -15   3   1 42.6843 40.3835   3
 -14  -3   1 -26.445 36.7806   3
  14  -3  -1 -45.583 30.2378   1
 -14   3   1 27.0606 38.9372   3
 -13  -3   1 -53.359 32.2634   3
  13  -3  -1 16.5848 30.5527   1
 -13   3   1 8.47994 36.0504   3
 -12  -3   1 17.5716 33.2079   3
  12  -3  -1 22.4926 27.2586   1
 -12   3   1 55.8636 34.1833   3
  11  -3  -1 -3.7148 26.3895   1
 -11  -3   1 28.2359 30.8399   3
 -11   3   1 46.4406 30.6745   3
  10  -3  -1 -21.854 23.1725   1
 -10  -3   1 11.6223 28.5899   3
 -10  -3   1 41.6188 39.0830   2
 -10   3   1 -31.912 26.9570   3
   9  -3  -1 47.5745 25.2691   1
  -9  -3   1 88.9460 23.1857   2
  -9  -3   1 89.6156 28.9355   3
  -9   3   1 -0.2877 26.4717   3
  -8  -3   1 23.3646 17.9403   2
   8  -3  -1 11.5843 21.7365   1
  -8  -3   1 42.9846 24.9424   3
  -8   3   1 25.4694 24.0812   3
  -7  -3   1 209.081 23.4250   2
   7  -3  -1 223.004 27.2353   1
  -7  -3   1 167.985 29.2006   3
  -7   3   1 224.811 28.8641   3
   6  -3  -1 95.6328 21.9537   1
  -6  -3   1 37.8717 16.7441   2
  -6  -3   1 101.724 23.2335   3
  -6   3   1 79.3757 21.6957   3
   5  -3  -1 58.8193 18.5136   1
  -5  -3   1 53.6744 16.2411   2
  -5  -3   1 66.9410 21.8348   3
  -5   3   1 75.9087 19.6304   3
   4  -3  -1 3.42296 14.5165   3
  -4  -3   1 -3.9704 15.1694   2
   4  -3  -1 15.5459 16.5727   1
  -4   3   1 1.15351 15.2841   3
   3  -3  -1 12.2790 14.3205   3
  -3  -3   1 20.6666 17.3055   2
   3  -3  -1 34.8151 14.8373   1
  -3   3   1 22.5932 14.3303   3
  -2  -3   1 8.32998 11.1895   1
   2  -3  -1 -14.782 13.6244   3
  -2  -3   1 -0.4199 17.9331   2
   2  -3  -1 1.85905 13.6158   1
  -2   3   1 20.2960 13.2916   3
  -2   3   1 -0.6704 13.5568   1
  -1  -3   1 -15.307 17.6457   2
   1  -3  -1 -2.9402 12.7916   3
   1  -3  -1 8.98444 13.1869   1
  -1  -3   1 21.1468 10.3407   1
  -1   3   1 10.4682 12.6639   1
   0  -3  -1 58.4995 13.6268   1
   0  -3   1 69.6019 12.0968   1
   0  -3   1 58.7580 21.0754   2
   0  -3   1 67.4751 15.8647   3
   0   3   1 81.8052 14.2026   1
   0   3  -1 68.5077 11.9168   1
   1  -3   1 150.656 22.8872   2
   1  -3   1 117.796 17.7942   3
   1  -3   1 107.462 13.5818   1
  -1  -3  -1 80.3081 21.6737   2
  -1  -3  -1 112.718 16.4475   1
  -1   3  -1 106.435 14.3002   1
  -2  -3  -1 239.626 22.1260   1
   2  -3   1 216.566 26.4620   2
   2  -3   1 253.922 20.0225   1
  -2  -3  -1 191.078 25.7440   2
   2  -3   1 208.293 23.2538   3
  -2   3  -1 292.218 21.1579   1
  -2   3  -1 181.476 22.7300   3
  -3  -3  -1 59.8723 18.3767   2
   3  -3   1 14.4775 18.7216   2
   3  -3   1 42.2399 14.3991   1
  -3   3  -1 27.6599 13.2758   1
  -3   3  -1 10.6063 16.8374   3
   4  -3   1 62.6175 16.9493   1
  -4  -3  -1 21.3263 15.8610   2
  -4  -3  -1 31.0672 19.2103   3
   4  -3   1 40.7274 19.0974   2
  -4   3  -1 25.7225 18.3464   3
  -5  -3  -1 -14.531 13.4317   2
  -5  -3  -1 8.80969 19.0732   3
   5  -3   1 -12.314 15.9293   2
   5  -3   1 13.1632 17.6450   1
  -5   3  -1 26.0182 19.7001   3
  -6  -3  -1 -7.0697 13.5688   2
   6  -3   1 -26.267 17.3059   1
  -6  -3  -1 29.4051 20.3171   3
   6  -3   1 0.74983 16.0444   2
  -6   3  -1 -14.450 19.8012   3
   7  -3   1 127.817 21.4710   2
   7  -3   1 167.650 25.2318   1
  -7  -3  -1 152.455 27.8349   3
  -7  -3  -1 81.0163 17.7016   2
  -7   3  -1 112.356 26.5659   3
  -8  -3  -1 224.667 32.7355   3
  -8  -3  -1 157.322 20.6921   2
   8  -3   1 203.036 28.4128   1
   8  -3   1 218.050 24.0624   2
  -8   3  -1 140.698 30.4365   3
  -9  -3  -1 73.5155 29.0135   3
   9  -3   1 22.5645 23.6641   1
  -9  -3  -1 8.21009 17.2488   2
   9  -3   1 15.9681 16.7365   2
  -9   3  -1 15.9617 27.0214   3
  10  -3   1 -10.211 14.9759   2
 -10  -3  -1 8.03747 27.6568   3
  10  -3   1 44.5534 27.2458   1
 -10   3  -1 -10.671 29.0516   3
  11  -3   1 19.6222 28.6048   1
 -11  -3  -1 -45.457 28.6840   3
 -11   3  -1 -29.880 30.3336   3
  12  -3   1 11.0791 30.0962   1
 -12  -3  -1 -43.350 31.5784   3
 -12   3  -1 24.9200 34.0637   3
 -13  -3  -1 -23.480 35.0926   3
 -13   3  -1 54.8787 38.2043   3
 -14  -3  -1 46.6538 41.5524   3
 -14   3  -1 -0.3749 38.5422   3
  14  -4  -1 5.12888 33.5342   1
 -14  -4   1 -12.149 40.0779   3
 -14   4   1 -7.0733 40.7980   3
  13  -4  -1 21.7521 31.6963   1
 -13  -4   1 5.80613 39.3379   3
 -13   4   1 10.9850 38.6841   3
  12  -4  -1 178.305 37.0051   1
 -12  -4   1 116.080 39.9847   3
 -12   4   1 112.591 40.6142   3
 -11  -4   1 130.461 39.7317   3
  11  -4  -1 41.0272 29.4097   1
 -11   4   1 79.4455 35.8872   3
  10  -4  -1 23.9314 21.2212   2
  10  -4  -1 -63.243 26.1167   1
 -10  -4   1 -61.999 29.0609   3
 -10   4   1 29.9219 30.7456   3
  -9  -4   1 -14.968 30.0208   3
  -9  -4   1 31.8371 20.4115   2
   9  -4  -1 -6.4924 20.2847   2
   9  -4  -1 15.4712 26.3580   1
  -9   4   1 -27.456 27.3419   3
   8  -4  -1 16.0791 23.3289   1
  -8  -4   1 -21.258 17.7049   2
  -8  -4   1 -15.658 27.4123   3
  -8   4   1 14.4134 25.3039   3
  -7  -4   1 49.9816 20.6554   2
   7  -4  -1 38.9705 22.0169   1
  -7  -4   1 40.4933 25.6691   3
  -7   4   1 60.1713 23.8273   3
  -6  -4   1 58.7776 24.7552   3
   6  -4  -1 74.2014 22.2067   1
  -6  -4   1 59.7994 19.8595   2
  -6   4   1 78.0213 22.2240   3
   5  -4  -1 163.603 24.1557   1
  -5  -4   1 210.830 24.9969   2
  -5   4   1 151.794 23.7046   3
   4  -4  -1 371.162 31.0373   1
  -4  -4   1 367.569 34.0620   2
  -4   4   1 359.779 31.0536   3
   3  -4  -1 83.3345 17.7671   1
  -3  -4   1 59.3707 15.1783   1
  -3  -4   1 52.7224 22.1307   2
  -3   4   1 56.2029 16.9447   3
  -2  -4   1 1347.11 74.2618   1
   2  -4  -1 1261.63 74.8623   1
  -2  -4   1 1333.83 81.1649   2
   1  -4  -1 1169.52 69.8093   1
  -1  -4   1 1198.06 74.8527   2
  -1  -4   1 1274.82 68.7309   1
   0  -4  -1 3.80906 20.6112   2
   0  -4   1 -1.5909 11.4389   1
   0  -4  -1 4.52869 13.5510   1
   0  -4   1 38.1726 22.9810   2
   0   4   1 1.18842 13.1388   1
   0   4  -1 16.1796 11.5481   1
  -1  -4  -1 3.67267 13.1306   1
   1  -4   1 -20.118 10.7626   1
  -1  -4  -1 5.01024 21.8443   2
   1  -4   1 18.5495 19.7830   2
  -1   4  -1 16.1108 12.1887   1
   2  -4   1 257.480 31.3868   2
  -2  -4  -1 251.403 24.0163   1
   2  -4   1 269.388 21.8847   1
  -2  -4  -1 190.230 28.5049   2
  -2   4  -1 257.114 22.5642   1
   3  -4   1 -3.2048 13.6801   1
   3  -4   1 4.74289 20.9486   2
  -3  -4  -1 8.18746 19.7667   2
  -3  -4  -1 21.8032 16.3078   1
  -3   4  -1 24.1591 17.7248   3
  -4  -4  -1 16.5780 17.2508   2
  -4  -4  -1 2.38816 22.0238   3
   4  -4   1 5.52580 15.5196   1
   4  -4   1 -10.054 20.9585   2
  -4   4  -1 -17.152 17.8631   3
   5  -4   1 19.7933 17.3464   1
   5  -4   1 32.8582 20.1864   2
  -5  -4  -1 -15.349 22.0069   3
  -5  -4  -1 5.06142 18.0316   2
  -5   4  -1 28.1673 20.9027   3
  -6  -4  -1 -1.0896 16.3204   2
   6  -4   1 -16.136 19.5663   2
   6  -4   1 3.66692 19.5236   1
  -6  -4  -1 -16.008 22.7994   3
  -6   4  -1 27.0712 23.0153   3
  -7  -4  -1 7.20569 24.6200   3
   7  -4   1 -4.8932 20.1333   2
  -7  -4  -1 -7.1571 16.8054   2
   7  -4   1 70.1856 23.1885   1
  -7   4  -1 4.02775 23.2988   3
   8  -4   1 7.57319 20.4153   2
   8  -4   1 -14.871 20.8246   1
  -8  -4  -1 -10.641 29.2020   3
  -8  -4  -1 -14.239 17.2119   2
  -8   4  -1 9.48971 27.2755   3
   9  -4   1 21.2833 19.9853   2
  -9  -4  -1 -6.1460 17.6974   2
   9  -4   1 -14.580 23.1240   1
  -9  -4  -1 -9.0086 29.6961   3
  -9   4  -1 13.8330 29.3804   3
  10  -4   1 -20.280 25.3415   1
 -10  -4  -1 21.7205 35.3707   3
  10  -4   1 11.6728 19.1098   2
 -10   4  -1 -2.0811 32.6545   3
  11  -4   1 128.853 33.7734   1
 -11  -4  -1 205.153 42.1823   3
 -11   4  -1 53.7619 37.5324   3
  12  -4   1 24.9319 29.0207   1
 -12  -4  -1 -4.0919 36.8109   3
 -12   4  -1 -12.074 36.2998   3
 -13  -4  -1 186.497 46.6884   3
  13  -4   1 193.400 38.1116   1
 -13   4  -1 263.830 50.3560   3
 -14   4  -1 135.476 46.9286   3
 -13  -5   1 26.4871 43.2509   3
  13  -5  -1 11.0585 31.4701   1
 -13   5   1 -5.0821 40.5399   3
  12  -5  -1 -16.023 29.3383   1
 -12  -5   1 28.1058 42.2378   3
 -12   5   1 5.91893 37.7232   3
  11  -5  -1 39.8174 31.3063   1
 -11  -5   1 68.8376 40.1530   3
 -11   5   1 100.184 38.4561   3
  10  -5  -1 201.403 34.7193   2
 -10  -5   1 229.045 45.5543   3
  10  -5  -1 283.271 36.9647   1
 -10   5   1 208.380 40.1113   3
  -9  -5   1 276.092 43.8437   3
  -9  -5   1 310.989 34.3972   2
   9  -5  -1 293.762 37.7869   2
   9  -5  -1 305.459 36.3290   1
  -9   5   1 315.876 40.6394   3
   8  -5  -1 73.4163 28.3694   2
  -8  -5   1 49.6683 31.6100   3
   8  -5  -1 94.8279 25.4450   1
  -8  -5   1 80.1684 23.6675   2
  -8   5   1 56.7530 27.3058   3
  -7  -5   1 -2.4147 28.3935   3
  -7  -5   1 50.3404 22.9281   2
   7  -5  -1 79.6099 28.4730   2
   7  -5  -1 55.5594 24.1507   1
  -7   5   1 89.0049 25.3094   3
   6  -5  -1 36.4089 26.2020   2
   6  -5  -1 78.1268 21.6339   1
  -6  -5   1 56.1543 28.5166   3
  -6  -5   1 94.1714 24.1851   2
  -6   5   1 64.2103 22.7201   3
   5  -5  -1 114.314 29.1583   2
  -5  -5   1 173.351 28.0189   2
   5  -5  -1 119.450 22.2732   1
  -5   5   1 81.6489 21.9618   3
  -4  -5   1 47.9397 18.2681   1
   4  -5  -1 44.5520 18.9507   1
   4  -5  -1 25.9048 26.1097   2
  -4  -5   1 68.3429 25.5522   2
  -4   5   1 22.8925 18.2703   3
  -3  -5   1 35.2601 15.7390   1
   3  -5  -1 70.8385 18.7236   1
  -3  -5   1 28.0879 24.0831   2
   3  -5  -1 21.5382 25.6467   2
  -2  -5   1 9.29246 13.4097   1
   2  -5  -1 -0.3094 24.5732   2
   2  -5  -1 19.9835 14.9398   1
  -2  -5   1 0.28838 24.5627   2
  -1  -5   1 -15.888 13.2710   1
  -1  -5   1 10.0689 23.4764   2
   1  -5  -1 -20.901 24.1456   2
   1  -5  -1 -3.9750 14.1594   1
   0  -5  -1 22.2833 15.4201   1
   0  -5   1 74.9062 27.2261   2
   0  -5   1 41.6742 13.9394   1
   0  -5  -1 45.4147 26.4398   2
   0   5  -1 72.7517 14.3520   1
   1  -5   1 2.22578 21.9159   2
  -1  -5  -1 21.7089 24.4983   2
   1  -5   1 12.5860 13.1163   1
  -1  -5  -1 -21.217 14.8268   1
   2  -5   1 234.875 22.2644   1
   2  -5   1 148.337 31.5004   2
  -2  -5  -1 227.173 32.8882   2
  -2  -5  -1 185.610 22.6351   1
   3  -5   1 187.491 21.3849   1
  -3  -5  -1 199.224 30.3956   2
   3  -5   1 112.932 29.3454   2
  -3  -5  -1 160.409 23.0828   1
   4  -5   1 132.706 20.0364   1
   4  -5   1 20.7666 25.8265   2
  -4  -5  -1 105.491 21.7655   1
  -4  -5  -1 112.969 26.7687   2
  -4   5  -1 53.9372 22.5721   3
   5  -5   1 290.379 37.8195   2
   5  -5   1 370.982 32.4384   1
  -5  -5  -1 314.853 38.2521   3
  -5  -5  -1 390.478 37.0259   2
  -5   5  -1 343.873 36.0285   3
  -6  -5  -1 145.348 31.9133   3
   6  -5   1 172.977 30.7471   2
   6  -5   1 164.301 25.1655   1
  -6  -5  -1 196.558 27.6305   2
  -6   5  -1 130.876 28.2294   3
  -7  -5  -1 59.8876 31.4270   3
   7  -5   1 -13.055 23.7094   2
   7  -5   1 -38.219 19.2942   1
  -7  -5  -1 -28.261 19.0348   2
  -7   5  -1 -2.8934 25.1198   3
   8  -5   1 80.4418 25.2596   1
   8  -5   1 84.9833 27.1259   2
  -8  -5  -1 15.6674 20.8913   2
  -8  -5  -1 70.4497 31.7648   3
  -8   5  -1 28.7213 29.7484   3
  -9  -5  -1 49.0353 22.8186   2
   9  -5   1 10.3170 24.5924   1
   9  -5   1 106.148 27.3556   2
  -9  -5  -1 73.6157 36.2150   3
  -9   5  -1 73.2425 33.3469   3
  10  -5   1 23.3380 27.0675   1
  10  -5   1 77.2864 26.1786   2
 -10  -5  -1 56.6297 36.3466   3
 -10   5  -1 45.2322 36.2096   3
 -11  -5  -1 21.7802 37.9061   3
  11  -5   1 -48.805 26.5668   1
 -11   5  -1 -16.760 37.1431   3
  12  -5   1 -25.214 31.4042   1
 -12  -5  -1 28.3316 39.6221   3
 -12   5  -1 24.3218 40.1842   3
 -13  -5  -1 10.9381 41.0819   3
  13  -5   1 2.72525 29.9144   1
 -13   5  -1 -4.9462 42.0373   3
  12  -6  -1 29.6392 31.4545   1
 -12  -6   1 87.2121 44.3297   3
  11  -6  -1 -0.9528 30.0394   1
 -11  -6   1 31.4104 40.2733   3
 -11   6   1 -19.295 34.0672   3
 -10  -6   1 54.7924 38.2310   3
  10  -6  -1 21.1590 27.0167   1
  10  -6  -1 -28.378 28.1850   2
 -10   6   1 -8.1910 30.4709   3
  -9  -6   1 27.9442 34.9247   3
   9  -6  -1 31.4133 26.5894   1
  -9  -6   1 72.4823 26.8098   2
   9  -6  -1 4.01688 29.4255   2
  -9   6   1 69.5166 30.5773   3
  -8  -6   1 -11.962 23.2314   2
   8  -6  -1 -3.5371 22.2200   1
   8  -6  -1 -14.480 30.3148   2
  -8  -6   1 -25.109 31.0044   3
  -8   6   1 -16.271 25.0122   3
   7  -6  -1 35.2778 23.6480   1
   7  -6  -1 -14.203 28.7525   2
  -7  -6   1 21.0269 30.6684   3
  -7  -6   1 26.2881 24.7006   2
  -7   6   1 -36.107 22.4266   3
  -6  -6   1 77.9911 33.0860   3
  -6  -6   1 95.1062 22.8893   1
  -6  -6   1 116.393 29.4782   2
   6  -6  -1 111.465 33.7283   2
   6  -6  -1 80.6609 24.0186   1
  -6   6   1 102.271 25.1914   3
   5  -6  -1 49.4502 31.2560   2
   5  -6  -1 87.6615 22.0357   1
  -5  -6   1 63.9923 20.5703   1
  -5  -6   1 48.4658 28.0975   2
  -4  -6   1 26.6534 28.1514   2
  -4  -6   1 -10.834 16.8141   1
   4  -6  -1 -5.6724 29.7565   2
   4  -6  -1 2.75268 19.3387   1
   3  -6  -1 53.4283 19.9524   1
   3  -6  -1 56.0590 31.1501   2
  -3  -6   1 -3.6625 15.8271   1
  -3  -6   1 15.3347 27.3427   2
  -2  -6   1 88.4909 18.3029   1
   2  -6  -1 53.6120 30.2512   2
   2  -6  -1 125.877 20.7965   1
  -2  -6   1 58.4809 29.1521   2
  -1  -6   1 9.10097 28.6841   2
   1  -6  -1 4.40234 16.5534   1
  -1  -6   1 -0.7337 15.1385   1
   1  -6  -1 19.2613 28.7656   2
   0  -6   1 426.292 34.5022   1
   0  -6  -1 394.555 45.3622   2
   0  -6   1 499.726 50.1709   2
   0  -6  -1 427.443 34.7418   1
   1  -6   1 445.028 47.4082   2
   1  -6   1 457.695 34.7379   1
  -1  -6  -1 376.504 45.0801   2
  -1  -6  -1 411.023 34.8665   1
   2  -6   1 105.290 31.6601   2
  -2  -6  -1 48.1024 19.1123   1
  -2  -6  -1 65.2654 30.3131   2
   2  -6   1 52.9510 17.7531   1
  -3  -6  -1 9.02783 18.3249   1
  -3  -6  -1 -0.5012 27.4997   2
   3  -6   1 -4.9013 16.7835   1
   3  -6   1 -50.461 27.8028   2
  -4  -6  -1 34.2695 20.9561   1
   4  -6   1 19.1555 29.2358   2
  -4  -6  -1 17.9514 26.5953   2
   4  -6   1 25.8263 16.9166   1
  -5  -6  -1 -9.0299 20.6695   1
  -5  -6  -1 -5.4420 28.9604   3
   5  -6   1 21.5612 29.4195   2
  -5  -6  -1 37.8156 26.7211   2
   5  -6   1 36.8046 20.2699   1
  -5   6  -1 -9.1581 22.8051   3
  -6  -6  -1 1.11694 23.5331   2
  -6  -6  -1 41.6617 30.2396   3
   6  -6   1 2.93076 19.8522   1
  -6  -6  -1 -16.361 20.2128   1
   6  -6   1 5.27629 27.1483   2
  -6   6  -1 16.6393 24.6951   3
  -7  -6  -1 94.5369 33.9127   3
   7  -6   1 46.9097 28.2968   2
   7  -6   1 10.0874 21.9296   1
  -7  -6  -1 61.2943 24.9700   2
  -7   6  -1 51.9704 28.2355   3
   8  -6   1 181.127 34.3011   2
   8  -6   1 146.741 28.5860   1
  -8  -6  -1 139.854 28.9623   2
  -8  -6  -1 118.510 36.4827   3
  -8   6  -1 135.603 34.4373   3
   9  -6   1 129.380 28.6399   1
   9  -6   1 157.754 34.4540   2
  -9  -6  -1 152.864 40.0272   3
  -9   6  -1 80.9340 34.7046   3
  10  -6   1 24.0658 26.9196   1
 -10  -6  -1 -13.778 34.1023   3
  10  -6   1 13.2707 27.8402   2
 -10   6  -1 65.7880 36.6720   3
  11  -6   1 -11.762 27.0718   1
 -11  -6  -1 12.0711 40.6480   3
 -11   6  -1 -30.691 37.6719   3
 -12  -6  -1 -22.327 41.2738   3
  12  -6   1 4.43582 30.6209   1
 -12   6  -1 56.4656 44.3335   3
 -11  -7   1 -13.046 47.1908   3
  11  -7  -1 15.8044 30.7027   1
  10  -7  -1 -48.397 27.0445   1
 -10  -7   1 -16.452 34.4866   3
  10  -7  -1 1.82669 31.4659   2
   9  -7  -1 35.7808 37.0640   2
   9  -7  -1 43.5126 28.2067   1
  -9  -7   1 67.2784 45.0524   2
  -9  -7   1 16.0949 35.7082   3
  -8  -7   1 -43.650 34.6516   3
  -8  -7   1 70.8097 25.3167   1
   8  -7  -1 8.99733 35.5876   2
   8  -7  -1 18.4092 23.4559   1
  -8  -7   1 46.6132 29.5353   2
  -8   7   1 24.1935 26.5827   3
  -7  -7   1 8.83851 26.9436   2
  -7  -7   1 20.0474 22.3447   1
  -7  -7   1 -37.816 29.1416   3
   7  -7  -1 -17.270 23.8555   1
   7  -7  -1 31.0156 34.8405   2
   6  -7  -1 112.900 37.5030   2
  -6  -7   1 0.74026 32.8155   3
   6  -7  -1 80.6066 24.0249   1
  -6  -7   1 57.8850 22.4451   1
  -6  -7   1 87.5975 29.9469   2
  -5  -7   1 289.319 31.7592   1
  -5  -7   1 258.872 40.9947   2
   5  -7  -1 230.005 44.3405   2
   5  -7  -1 340.762 33.9418   1
   4  -7  -1 40.3226 22.8490   1
  -4  -7   1 69.9319 20.3052   1
   4  -7  -1 75.5603 35.4155   2
  -3  -7   1 31.4089 31.7412   2
   3  -7  -1 60.7135 22.4103   1
   3  -7  -1 58.6172 34.8104   2
  -3  -7   1 14.9277 18.7953   1
   2  -7  -1 25.0017 34.3766   2
   2  -7  -1 63.3804 20.4579   1
  -2  -7   1 7.04056 17.7076   1
  -2  -7   1 62.0889 34.0211   2
   1  -7  -1 -12.034 17.5570   1
  -1  -7   1 13.7410 16.6993   1
  -1  -7   1 24.8394 32.6201   2
   1  -7  -1 -18.934 32.9202   2
   0  -7   1 -15.923 29.6033   2
   0  -7  -1 34.7617 33.4477   2
   0  -7  -1 -20.314 17.9024   1
   0  -7   1 -19.149 15.2864   1
  -1  -7  -1 32.2646 20.4022   1
   1  -7   1 31.0688 17.6976   1
   1  -7   1 50.0925 33.6992   2
  -1  -7  -1 36.5914 31.9654   2
  -2  -7  -1 92.1756 33.5013   2
   2  -7   1 101.226 36.1230   2
  -2  -7  -1 70.5528 22.2386   1
   2  -7   1 70.5931 19.7745   1
  -3  -7  -1 212.147 28.8684   1
   3  -7   1 317.701 45.3422   2
   3  -7   1 323.591 29.3811   1
  -3  -7  -1 217.014 41.1303   2
   4  -7   1 99.3669 20.7148   1
   4  -7   1 81.4487 33.4672   2
  -4  -7  -1 76.3549 23.1681   1
  -4  -7  -1 82.6614 33.0209   2
  -5  -7  -1 -17.079 29.0459   3
  -5  -7  -1 17.4693 29.9268   2
   5  -7   1 50.1322 21.3131   1
  -5  -7  -1 39.8125 23.3204   1
   5  -7   1 10.4042 32.5643   2
   6  -7   1 502.261 41.9634   1
   6  -7   1 455.481 53.0312   2
  -6  -7  -1 433.568 42.9822   1
  -6  -7  -1 531.046 51.7219   2
   7  -7   1 55.8254 34.3999   2
  -7  -7  -1 106.172 30.3357   2
  -7  -7  -1 18.6977 33.3377   3
  -7  -7  -1 105.581 27.2522   1
   7  -7   1 46.6175 24.8127   1
  -7   7  -1 91.6317 30.9395   3
   8  -7   1 42.5942 33.0336   2
  -8  -7  -1 17.3299 33.0515   3
  -8  -7  -1 -1.2740 24.6248   1
   8  -7   1 -10.130 23.3120   1
  -8  -7  -1 30.2521 27.6739   2
  -8   7  -1 1.92852 29.9751   3
  -9  -7  -1 -23.457 25.3410   1
   9  -7   1 12.0946 30.9900   2
   9  -7   1 -5.3473 25.5457   1
  -9  -7  -1 50.7291 33.7708   3
  -9   7  -1 25.5575 33.4476   3
  10  -7   1 38.4046 27.8805   1
 -10  -7  -1 -55.803 37.5666   3
  10  -7   1 56.6001 32.4294   2
 -10   7  -1 -34.394 34.8315   3
 -11  -7  -1 -15.852 56.6682   3
  11  -7   1 7.73947 29.7330   1
  -9  -8   1 11.2129 39.3692   3
   9  -8  -1 4.68262 37.4709   2
   9  -8  -1 -20.371 27.6251   1
  -8  -8   1 12.4256 30.6523   2
  -8  -8   1 30.0019 37.6398   3
   8  -8  -1 -10.228 25.8037   1
   8  -8  -1 6.96856 36.3928   2
   7  -8  -1 -25.527 23.8593   1
   7  -8  -1 -45.450 36.1513   2
  -7  -8   1 45.0514 32.7293   2
  -7  -8   1 14.5836 32.8068   3
   6  -8  -1 -30.058 36.4178   2
  -6  -8   1 -3.7998 33.7657   3
  -6  -8   1 0.48159 32.2997   2
   6  -8  -1 18.6896 23.9934   1
   5  -8  -1 48.7885 40.0764   2
   5  -8  -1 51.2758 24.1635   1
  -5  -8   1 36.6194 35.0408   2
  -4  -8   1 191.360 41.3787   2
   4  -8  -1 166.703 28.9291   1
   4  -8  -1 145.195 43.2766   2
  -3  -8   1 184.305 39.6101   2
   3  -8  -1 203.309 29.7299   1
   3  -8  -1 192.809 44.3023   2
   2  -8  -1 110.633 38.0178   2
  -2  -8   1 92.8951 36.3390   2
   2  -8  -1 161.469 27.5160   1
   1  -8  -1 59.5162 22.1736   1
  -1  -8   1 34.2060 36.3347   2
   1  -8  -1 47.8323 35.6840   2
   0  -8  -1 -7.2967 19.4260   1
   0  -8  -1 10.5804 34.7148   2
   0  -8   1 14.4219 36.7073   2
   1  -8   1 33.1050 37.2628   2
  -1  -8  -1 61.7261 37.1020   2
  -1  -8  -1 69.6030 23.3007   1
  -2  -8  -1 103.714 39.0951   2
  -2  -8  -1 66.8855 25.5951   1
   2  -8   1 136.887 42.8273   2
   3  -8   1 63.4730 40.7542   2
  -3  -8  -1 75.7682 36.3771   2
  -3  -8  -1 28.6197 34.5695   1
   4  -8   1 16.9015 37.2023   2
  -4  -8  -1 36.9457 34.2754   2
   5  -8   1 66.3084 39.6660   2
  -5  -8  -1 17.5781 30.2559   2
  -5  -8  -1 24.1286 31.8930   3
  -6  -8  -1 42.0123 33.2331   2
   6  -8   1 35.5845 36.9707   2
  -6  -8  -1 -4.7998 31.0508   3
  -7  -8  -1 8.77792 30.4798   2
   7  -8   1 30.1700 38.8210   2
  -7  -8  -1 8.05634 32.5722   3
   8  -8   1 -11.439 35.0646   2
  -8  -8  -1 36.7119 37.9574   2
  -8  -8  -1 -12.402 33.8057   3
   9  -8   1 68.1462 37.7040   2
  -9  -8  -1 73.8813 39.3135   3
  -6  -9   1 53.9121 37.2022   2
  -6  -9   1 98.2846 40.1496   3
   6  -9  -1 92.6819 46.1643   2
   5  -9  -1 61.0502 43.7497   2
  -5  -9   1 11.4662 36.6550   2
  -4  -9   1 31.0015 37.8900   2
   4  -9  -1 -31.330 39.4368   2
  -3  -9   1 -33.761 31.0378   2
   3  -9  -1 14.8473 41.6982   2
  -2  -9   1 -16.342 37.2146   2
   2  -9  -1 9.26616 40.5648   2
  -1  -9   1 22.0364 35.1281   2
   1  -9  -1 27.8407 40.0591   2
   0  -9   1 108.344 43.1692   2
   0  -9  -1 22.4204 39.7830   2
  -1  -9  -1 37.6148 39.0972   2
   1  -9   1 45.6355 40.9541   2
   2  -9   1 75.9241 43.1352   2
  -2  -9  -1 131.563 42.4545   2
   3  -9   1 53.3446 43.4832   2
  -3  -9  -1 79.9981 41.0967   2
  -4  -9  -1 18.4300 34.4348   2
   4  -9   1 46.0344 38.6810   2
  -5  -9  -1 29.1513 32.9579   2
  -5  -9  -1 -26.338 32.8435   3
   5  -9   1 -71.129 37.3347   2
  -6  -9  -1 49.9283 36.7734   3
  -6  -9  -1 10.3083 32.6273   2
   6  -9   1 5.72897 37.4696   2
 -15   0   2 -8.2835 33.7703   3
 -14   0   2 -12.732 32.0075   3
 -13   0   2 19.1528 29.7250   3
 -12   0   2 8.13539 26.3223   3
 -11   0   2 15.9704 24.6697   3
 -10   0   2 -27.225 21.5018   3
  10   0  -2 -17.390 22.6194   1
   9   0  -2 -33.716 18.5223   1
   9   0  -2 -5.9396 14.1451   2
  -9   0   2 -12.032 19.7663   3
  -8   0   2 79.7759 21.1517   3
   8   0  -2 56.6268 17.8255   2
   8   0  -2 100.743 20.5584   1
   7   0  -2 15.5296 15.6033   1
   7   0  -2 32.6297 18.6608   2
  -7   0   2 1.82079 16.2448   3
   6   0  -2 31.1948 21.4941   2
  -6   0   2 86.8256 15.2728   2
  -6   0   2 57.1479 16.9000   3
   6   0  -2 54.9570 18.2890   1
  -5   0   2 1213.29 65.0642   2
   5   0  -2 967.554 71.2333   2
  -5   0   2 1079.36 66.8097   3
   5   0  -2 1139.65 66.7280   1
   5   0  -2 1231.29 67.3946   3
   4   0  -2 414.823 33.7956   1
   4   0  -2 345.660 36.8615   2
  -4   0   2 460.799 33.6903   2
   4   0  -2 504.539 34.8253   3
  -4   0   2 497.341 33.8177   3
  -4   0   2 469.302 33.7130   1
   3   0  -2 386.177 34.7979   2
  -3   0   2 361.076 27.9016   1
  -3   0   2 427.091 32.4013   2
   3   0  -2 347.552 31.0720   3
  -3   0   2 392.665 29.6387   3
   3   0  -2 357.337 29.9376   1
  -2   0   2 1945.21 105.266   2
   2   0  -2 1639.74 106.085   2
  -2   0   2 2050.49 102.332   1
   2   0  -2 2009.65 102.442   1
  -2   0   2 1934.22 102.427   3
  -1   0   2 829.293 41.9163   1
   1   0  -2 825.424 41.8395   1
   1   0  -2 604.121 48.1393   2
  -1   0   2 691.135 47.8421   2
   0   0  -2 61.5035 15.4056   2
   0   0   2 68.4486 7.46673   3
   0   0   2 47.3115 15.9177   2
   0   0   2 45.3786 6.71835   1
   0   0  -2 54.5726 7.53786   3
   0   0  -2 46.7619 7.01578   1
   1   0   2 307.576 23.4472   3
  -1   0  -2 342.988 24.5492   2
   1   0   2 313.331 28.5602   2
  -1   0  -2 325.094 23.3906   3
  -2   0  -2 35.5593 7.33992   2
   2   0   2 9.53627 13.0173   3
  -2   0  -2 5.26590 12.1783   3
   2   0   2 54.5217 12.8573   2
  -3   0  -2 82.8865 15.9219   3
   3   0   2 90.6647 17.0281   3
  -3   0  -2 86.8489 15.0918   1
   4   0   2 52.8382 16.9390   3
  -4   0  -2 50.3132 15.8070   3
  -4   0  -2 45.5700 13.7022   1
  -5   0  -2 220.129 23.1180   3
  -6   0  -2 32.8966 17.3933   3
  -7   0  -2 13.7114 17.6733   3
  -8   0  -2 -10.692 18.9981   3
  -9   0  -2 1149.38 77.1434   3
 -10   0  -2 319.463 37.2139   3
 -11   0  -2 11.4658 27.0385   3
 -12   0  -2 115.119 32.7193   3
 -13   0  -2 20.1854 31.1693   3
 -14   0  -2 13.7188 32.8319   3
 -15   0  -2 -15.833 35.3053   3
 -15  -1   2 103.287 38.8242   3
 -15   1   2 35.0033 35.5773   3
 -14  -1   2 0.41409 32.3511   3
 -14   1   2 39.1873 32.5807   3
 -13  -1   2 4.84717 31.8147   3
 -13   1   2 44.0366 30.2930   3
 -12  -1   2 114.557 32.4632   3
  12  -1  -2 117.402 29.4801   1
 -12   1   2 150.496 32.4289   3
  11  -1  -2 678.177 57.5580   1
 -11  -1   2 834.194 65.2839   3
 -11   1   2 730.468 62.9462   3
 -10  -1   2 986.608 70.9399   3
  10  -1  -2 940.123 66.3542   1
 -10   1   2 1019.09 70.3655   3
   9  -1  -2 546.401 47.6418   2
  -9  -1   2 504.711 43.9085   3
  -9  -1   2 498.284 36.5675   2
   9  -1  -2 542.306 43.5650   1
  -9   1   2 619.137 46.0133   3
   9   1  -2 521.585 35.2297   2
  -8  -1   2 311.601 27.7226   2
  -8  -1   2 289.243 31.2102   3
   8  -1  -2 324.195 30.8613   2
   8  -1  -2 288.955 28.7329   1
   8   1  -2 267.901 24.6709   2
  -8   1   2 244.168 30.0817   3
   7  -1  -2 96.2547 19.8669   1
  -7  -1   2 120.844 20.2239   2
  -7  -1   2 90.9543 21.7128   3
   7  -1  -2 175.787 21.3423   2
   7   1  -2 124.152 15.7313   2
   7   1  -2 138.557 21.9020   1
  -7   1   2 101.531 20.8921   3
   6  -1  -2 0.25977 15.0036   2
  -6  -1   2 27.6258 21.6770   2
  -6  -1   2 28.6714 17.1882   3
   6  -1  -2 15.8711 17.0487   1
   6   1  -2 -8.4490 11.8495   2
  -6   1   2 32.6169 15.7311   3
   6   1  -2 2.88330 16.1082   1
   5  -1  -2 296.212 24.4360   2
   5  -1  -2 261.044 25.6869   1
  -5  -1   2 224.408 24.5577   3
  -5  -1   2 274.707 26.6507   1
   5  -1  -2 263.355 23.8732   3
  -5  -1   2 299.804 29.0875   2
   5   1  -2 270.557 24.5647   1
   5   1  -2 247.191 21.7734   2
  -5   1   2 256.480 23.7807   3
  -4  -1   2 71.4493 18.0628   3
  -4  -1   2 93.0763 19.2400   2
   4  -1  -2 45.2323 17.3083   1
   4  -1  -2 85.3607 16.5054   2
   4  -1  -2 80.6305 15.0664   3
  -4  -1   2 61.3884 15.7511   1
   4   1  -2 50.3750 14.4752   2
  -4   1   2 72.5211 14.7688   3
  -4   1   2 76.2575 15.6047   1
   4   1  -2 47.6347 13.9840   1
   3  -1  -2 -4.3416 14.8622   1
   3  -1  -2 16.4902 11.9927   3
  -3  -1   2 24.0753 15.0122   2
  -3  -1   2 -3.4562 11.2611   1
   3   1  -2 27.3453 13.7371   2
  -3   1   2 2.36506 14.9062   1
   3   1  -2 -1.8835 12.1371   1
  -3   1   2 2.32158 11.6646   3
  -2  -1   2 92.9679 15.2373   2
   2  -1  -2 108.372 15.7809   1
   2  -1  -2 92.0364 10.7470   3
  -2  -1   2 80.8167 11.1306   1
  -2   1   2 97.6005 11.5264   3
   2   1  -2 93.1696 10.7990   1
   2   1  -2 72.5877 14.6938   2
  -2   1   2 98.1919 14.2909   1
  -1  -1   2 333.097 25.4956   2
  -1  -1   2 339.601 20.3417   1
   1  -1  -2 344.073 20.9589   3
   1  -1  -2 353.004 26.0624   1
   1   1  -2 353.806 26.9459   2
   1   1  -2 345.767 20.1838   1
  -1   1   2 405.016 24.5045   1
   0  -1   2 -10.048 11.4844   2
   0  -1  -2 10.2052 8.44565   3
   0  -1  -2 5.58182 9.81563   1
   0  -1   2 5.61515 10.4360   3
   0   1   2 -9.5993 9.31953   1
   0   1  -2 15.1375 11.7820   2
   0   1  -2 -7.1954 10.6011   3
   1  -1   2 485.125 33.6450   3
   1  -1   2 448.561 27.3517   1
  -1  -1  -2 444.281 30.0455   3
   1  -1   2 463.895 30.6015   2
  -1   1  -2 452.378 33.4978   3
  -1   1  -2 467.389 30.3297   2
   1   1   2 429.527 30.2197   3
  -1   1  -2 446.708 27.3287   1
   2  -1   2 1043.35 58.0254   1
   2  -1   2 1070.90 61.3282   3
   2  -1   2 1022.98 57.9709   2
  -2  -1  -2 956.680 59.4966   3
   2   1   2 993.574 59.5544   3
  -2   1  -2 1074.46 58.1139   2
  -2   1  -2 993.641 61.2020   3
  -2   1  -2 1035.96 57.7978   1
   3  -1   2 3456.46 182.245   1
   3  -1   2 3466.51 183.844   3
   3  -1   2 3508.32 181.321   2
  -3  -1  -2 3370.56 183.295   3
  -3   1  -2 3440.21 184.037   3
  -3   1  -2 3517.90 182.187   1
   3   1   2 3365.13 183.124   3
  -4  -1  -2 5704.45 306.440   2
   4  -1   2 5900.06 309.974   1
  -4  -1  -2 5725.97 310.971   3
   4  -1   2 5929.46 311.519   3
   4  -1   2 5743.63 307.926   2
  -4   1  -2 5759.89 311.296   3
   4   1   2 6727.85 314.795   3
  -4   1  -2 5931.51 309.920   1
   5  -1   2 1064.23 60.0009   2
  -5  -1  -2 1072.96 66.5769   3
   5  -1   2 1126.87 65.5033   1
  -5   1  -2 1087.46 67.0543   3
  -6  -1  -2 206.301 24.8030   3
   6  -1   2 196.480 18.2815   2
   6  -1   2 207.516 24.4727   1
  -6   1  -2 205.477 25.3863   3
   7  -1   2 35.2244 9.89733   2
  -7  -1  -2 35.0937 19.1264   3
  -7   1  -2 13.0027 19.1922   3
  -8  -1  -2 151.028 26.3375   3
   8  -1   2 217.341 17.6787   2
   8  -1   2 171.568 15.1657   2
  -8   1  -2 131.124 26.4443   3
  -9  -1  -2 2.20843 23.0158   3
  -9   1  -2 -28.041 21.5486   3
 -10  -1  -2 -8.3126 23.6972   3
 -10   1  -2 -10.513 24.2020   3
 -11  -1  -2 94.3450 29.7451   3
 -11   1  -2 83.0018 29.4696   3
 -12  -1  -2 22.5595 30.0174   3
 -12   1  -2 17.4117 29.4081   3
 -13  -1  -2 20.4079 32.9799   3
 -13   1  -2 22.8749 31.7392   3
 -14  -1  -2 17.5002 35.7152   3
 -14   1  -2 45.1565 35.3736   3
 -15  -1  -2 56.5263 39.4945   3
 -15   1  -2 80.3859 39.9571   3
 -15  -2   2 40.2540 39.2331   3
 -15   2   2 93.0492 40.2504   3
  14  -2  -2 72.0587 31.2635   1
 -14  -2   2 88.7450 39.0361   3
 -14   2   2 57.3853 36.2982   3
 -13  -2   2 25.4072 32.4922   3
  13  -2  -2 -11.674 27.3931   1
 -13   2   2 -17.386 31.5644   3
  12  -2  -2 81.1802 32.1594   1
 -12  -2   2 67.6669 31.9662   3
 -12   2   2 40.3628 30.1422   3
  11  -2  -2 21.4902 24.9518   1
 -11  -2   2 94.1098 30.9009   3
 -11   2   2 53.7983 28.3325   3
 -10  -2   2 80.3625 27.6893   3
  10  -2  -2 58.6707 24.5091   1
 -10  -2   2 62.9275 18.8743   2
 -10   2   2 69.2962 27.5211   3
   9  -2  -2 92.9037 25.9274   1
  -9  -2   2 147.121 25.2547   2
  -9  -2   2 134.182 27.5783   3
  -9   2   2 48.1555 25.0926   3
   9   2  -2 110.455 16.6054   2
  -8  -2   2 84.2572 24.9328   2
   8  -2  -2 15.9808 20.1561   1
  -8  -2   2 44.7326 22.1643   3
   8   2  -2 35.5678 14.1261   2
  -8   2   2 31.7617 21.6651   3
  -7  -2   2 18.6179 19.2228   2
  -7  -2   2 23.1570 19.2021   3
   7  -2  -2 17.3394 18.2222   1
   7   2  -2 29.6733 13.6697   2
  -7   2   2 15.5013 19.1780   3
  -6  -2   2 19.2564 16.1318   2
   6  -2  -2 -32.684 17.0481   1
  -6  -2   2 -0.3718 17.5492   3
  -6   2   2 2.68108 16.9607   3
   6   2  -2 -15.363 12.3933   2
   5  -2  -2 347.995 28.9499   1
  -5  -2   2 295.352 29.3357   3
  -5  -2   2 299.433 27.5145   2
   5  -2  -2 318.254 26.4953   3
   5   2  -2 300.807 25.5028   2
  -5   2   2 300.506 27.2647   3
   4  -2  -2 3300.70 174.919   3
  -4  -2   2 3146.02 175.469   2
  -4  -2   2 3346.27 174.252   1
   4  -2  -2 3350.28 176.109   1
  -4   2   2 3249.64 175.698   3
   4   2  -2 3379.71 175.767   2
   3  -2  -2 5979.74 310.798   1
  -3  -2   2 5882.22 308.872   1
  -3  -2   2 5877.41 311.012   2
   3  -2  -2 5955.61 309.489   3
  -3   2   2 6068.96 310.527   1
   3   2  -2 6102.82 311.307   2
  -3   2   2 5643.61 309.809   3
  -2  -2   2 1153.31 69.2214   2
   2  -2  -2 1130.49 67.3688   1
   2  -2  -2 1210.74 66.2831   3
   2   2  -2 1198.19 69.1189   2
  -2   2   2 1258.62 68.0487   1
  -2   2   2 1190.68 65.8758   3
  -1  -2   2 11.1697 17.3680   2
   1  -2  -2 -8.6817 9.85557   3
   1  -2  -2 -5.0741 12.6943   1
  -1  -2   2 16.3735 7.84674   1
  -1   2   2 34.0851 12.2218   1
   1   2  -2 -12.544 16.1594   2
   0  -2   2 297.665 26.7210   2
   0  -2  -2 257.036 21.9865   1
   0  -2   2 252.717 18.4853   1
   0  -2   2 257.360 22.8120   3
   0   2  -2 319.652 18.9788   1
   0   2  -2 309.298 26.7613   2
   0   2   2 306.206 25.0439   1
   1  -2   2 285.227 26.6482   2
   1  -2   2 293.805 25.4284   3
   1  -2   2 343.306 21.9401   1
  -1  -2  -2 321.509 24.5575   1
  -1   2  -2 279.278 21.5380   1
  -1   2  -2 262.285 25.4620   3
   2  -2   2 57.3357 16.8184   2
   2  -2   2 36.1960 16.3380   3
   2  -2   2 52.5841 13.1113   1
  -2  -2  -2 17.1293 15.9654   3
  -2   2  -2 73.0019 13.1535   1
  -2   2  -2 29.6823 16.0372   2
  -2   2  -2 40.6733 17.2906   3
  -3  -2  -2 4.89601 13.9643   2
   3  -2   2 -6.7323 15.1111   3
   3  -2   2 -0.9764 14.2955   2
  -3  -2  -2 -25.473 15.2493   3
   3  -2   2 7.74250 13.8210   1
  -3   2  -2 6.11563 13.5168   1
  -3   2  -2 -2.1162 17.3051   3
   4  -2   2 5.41466 14.7686   1
  -4  -2  -2 1.01068 16.2932   3
   4  -2   2 -4.3863 13.6807   2
  -4  -2  -2 6.57248 12.0032   2
  -4   2  -2 0.60744 17.1198   3
  -4   2  -2 -6.5867 15.5498   1
  -5  -2  -2 234.784 21.1667   2
   5  -2   2 175.242 20.9444   2
   5  -2   2 227.431 24.1292   1
  -5  -2  -2 240.567 26.2027   3
  -5   2  -2 228.619 26.0020   3
  -6  -2  -2 22.1066 19.3548   3
  -6  -2  -2 4.10122 10.4334   2
   6  -2   2 -24.187 17.1031   1
   6  -2   2 26.8562 13.3766   2
  -6   2  -2 34.1434 20.3108   3
   7  -2   2 55.9078 21.4515   1
  -7  -2  -2 43.9135 11.4766   2
   7  -2   2 88.1049 14.8970   2
  -7  -2  -2 93.7420 23.0555   3
  -7   2  -2 56.3102 22.4288   3
   8  -2   2 282.553 26.0818   2
  -8  -2  -2 283.930 33.3473   3
   8  -2   2 321.788 33.6397   1
  -8   2  -2 263.941 33.9750   3
   9  -2   2 197.639 28.4428   1
  -9  -2  -2 171.286 30.5777   3
   9  -2   2 170.905 18.8057   2
  -9   2  -2 146.000 30.7396   3
 -10  -2  -2 365.488 43.7115   3
 -10   2  -2 413.761 43.7935   3
 -11  -2  -2 620.637 55.0567   3
 -11   2  -2 501.083 52.1455   3
 -12  -2  -2 306.567 44.9398   3
 -12   2  -2 275.967 43.5524   3
 -13  -2  -2 -16.342 33.3004   3
 -13   2  -2 6.67964 32.9397   3
 -14  -2  -2 36.5903 37.2601   3
 -14   2  -2 15.4156 35.5532   3
 -15   2  -2 56.1026 39.7591   3
 -15  -3   2 -3.2181 57.2707   3
 -15   3   2 26.6870 39.4935   3
  14  -3  -2 -8.0584 27.6096   1
 -14  -3   2 1.18384 36.0737   3
 -14   3   2 -41.386 35.4648   3
 -13  -3   2 -17.212 32.3502   3
  13  -3  -2 31.3668 31.9575   1
 -13   3   2 -25.328 33.2235   3
 -12  -3   2 55.9138 33.0245   3
  12  -3  -2 27.6659 31.3573   1
 -12   3   2 -40.415 30.6261   3
  11  -3  -2 27.3316 28.6992   1
 -11  -3   2 27.7593 30.6578   3
 -11   3   2 33.2575 30.9403   3
 -10  -3   2 39.7243 27.2966   2
 -10  -3   2 60.0952 29.4846   3
  10  -3  -2 -8.5176 23.7072   1
 -10   3   2 32.2883 28.2669   3
  -9  -3   2 1110.29 69.0397   2
  -9  -3   2 942.681 75.3767   3
   9  -3  -2 915.985 68.3505   1
  -9   3   2 977.671 73.1867   3
   8  -3  -2 251.793 30.8140   1
  -8  -3   2 216.300 32.6772   3
  -8  -3   2 327.010 30.7151   2
  -8   3   2 270.896 34.0560   3
  -7  -3   2 4.36143 16.2877   2
  -7  -3   2 5.91030 21.7576   3
   7  -3  -2 21.5786 20.4887   1
  -7   3   2 16.8396 20.8594   3
  -6  -3   2 26.8463 22.0489   3
   6  -3  -2 48.8111 18.7295   1
  -6  -3   2 52.9834 17.3091   2
  -6   3   2 26.5741 19.1690   3
   5  -3  -2 131.427 20.8291   1
  -5  -3   2 140.927 20.6945   2
  -5   3   2 107.881 20.3141   3
   4  -3  -2 83.3711 18.0496   1
   4  -3  -2 76.7991 15.8234   3
  -4  -3   2 61.1170 18.5424   2
  -4   3   2 52.6717 15.9496   3
   3  -3  -2 20.3239 15.3924   1
  -3  -3   2 47.9172 18.2435   2
   3  -3  -2 46.0670 14.5023   3
  -3   3   2 43.2097 14.0926   3
   2  -3  -2 57.4789 14.8769   3
  -2  -3   2 103.177 21.1218   2
   2  -3  -2 85.3887 16.1806   1
  -2   3   2 97.8240 16.9134   1
  -1  -3   2 -16.780 8.39128   1
   1  -3  -2 -6.4688 12.3841   1
  -1  -3   2 -9.8822 18.5255   2
   1  -3  -2 -14.668 11.3043   3
  -1   3   2 -8.0981 12.8501   1
   0  -3  -2 103.548 15.3640   1
   0  -3   2 160.625 23.9798   2
   0  -3   2 118.873 21.1333   3
   0  -3   2 77.6485 11.2560   1
   0   3   2 95.2153 15.8808   1
   0   3  -2 117.413 12.2742   1
   1  -3   2 294.764 21.6365   1
  -1  -3  -2 300.062 25.0744   1
   1  -3   2 291.051 29.5541   2
   1  -3   2 262.797 29.7113   3
  -1   3  -2 301.138 23.3785   1
  -1   3  -2 255.116 25.0789   3
  -2  -3  -2 1317.22 75.7087   1
   2  -3   2 1288.18 78.1453   2
   2  -3   2 1335.97 72.6446   1
  -2   3  -2 1305.53 78.0847   3
  -2   3  -2 1315.78 72.6040   1
   3  -3   2 193.836 25.1211   2
  -3  -3  -2 185.359 23.7121   3
  -3  -3  -2 130.597 21.8833   2
   3  -3   2 259.915 21.5229   1
  -3   3  -2 244.459 20.4902   1
  -3   3  -2 206.380 24.9520   3
  -4  -3  -2 307.052 30.3784   3
  -4  -3  -2 312.682 27.2642   2
   4  -3   2 313.141 26.4389   1
   4  -3   2 255.264 28.5744   2
  -4   3  -2 320.276 30.7300   3
  -5  -3  -2 -0.1053 19.4788   3
  -5  -3  -2 -0.9603 14.3299   2
   5  -3   2 -2.6315 15.4906   2
   5  -3   2 11.0616 16.3971   1
  -5   3  -2 9.97156 19.7002   3
  -6  -3  -2 220.984 30.3593   3
   6  -3   2 281.370 27.7900   1
   6  -3   2 230.428 25.9953   2
  -6  -3  -2 236.435 23.2183   2
  -6   3  -2 243.020 30.4652   3
   7  -3   2 16.7422 20.9489   1
   7  -3   2 46.3971 17.1226   2
  -7  -3  -2 0.73868 13.9112   2
  -7  -3  -2 21.8585 23.7880   3
  -7   3  -2 25.9059 23.8076   3
   8  -3   2 -5.1198 15.4226   2
  -8  -3  -2 -11.230 13.4848   2
   8  -3   2 -15.297 21.4003   1
  -8  -3  -2 32.7519 25.5423   3
  -8   3  -2 3.88492 24.0091   3
  -9  -3  -2 29.3520 15.6055   2
  -9  -3  -2 -12.272 25.9756   3
   9  -3   2 16.1298 15.8683   2
   9  -3   2 20.7006 24.9165   1
  -9   3  -2 29.6850 27.2686   3
  10  -3   2 3.55352 24.7459   2
  10  -3   2 11.0904 24.9278   1
 -10  -3  -2 -0.1320 27.8564   3
 -10   3  -2 -5.1845 28.2691   3
  11  -3   2 35.0340 27.6112   1
 -11  -3  -2 37.0638 31.5435   3
 -11   3  -2 -30.778 29.9742   3
 -12  -3  -2 44.9417 35.6968   3
 -12   3  -2 14.5712 33.2359   3
 -13  -3  -2 5.07494 39.0760   3
 -13   3  -2 62.0570 37.8350   3
 -14  -3  -2 21.6002 41.6664   3
 -14   3  -2 -14.763 36.6908   3
 -14  -4   2 29.9458 40.4683   3
  14  -4  -2 -51.176 35.1831   1
 -14   4   2 29.7096 40.9673   3
 -13  -4   2 37.2105 38.4805   3
  13  -4  -2 -7.1915 31.1983   1
 -13   4   2 41.9132 39.6404   3
 -12  -4   2 43.2835 37.8585   3
  12  -4  -2 43.7466 30.4646   1
 -12   4   2 29.8350 35.9948   3
 -11  -4   2 -19.001 32.9292   3
  11  -4  -2 41.4831 22.0595   2
  11  -4  -2 32.2158 29.5993   1
 -11   4   2 -13.380 31.9632   3
  10  -4  -2 -17.970 23.8637   1
 -10  -4   2 38.8805 25.2921   2
 -10  -4   2 -3.1387 32.3451   3
 -10   4   2 5.03150 29.7472   3
  -9  -4   2 52.2544 30.3558   3
  -9  -4   2 40.2139 22.2784   2
   9  -4  -2 -11.859 25.2902   1
  -9   4   2 30.9491 28.5400   3
  -8  -4   2 60.6955 21.9536   2
   8  -4  -2 51.6201 24.5239   1
  -8  -4   2 64.9458 28.4607   3
  -8   4   2 43.9866 25.4481   3
   7  -4  -2 83.3122 23.6147   1
  -7  -4   2 48.3189 26.5077   3
  -7  -4   2 70.3783 21.7155   2
  -7   4   2 6.90577 21.1068   3
  -6  -4   2 66.4237 26.3627   3
   6  -4  -2 101.899 21.5842   1
  -6  -4   2 76.4066 21.2728   2
  -6   4   2 110.583 21.6034   3
  -5  -4   2 776.678 55.2913   2
   5  -4  -2 810.493 53.4619   1
  -5   4   2 757.907 52.9168   3
   4  -4  -2 1213.75 76.0758   1
  -4  -4   2 1395.18 79.7610   2
  -4   4   2 1288.12 76.3497   3
   3  -4  -2 2347.29 130.109   1
   3  -4  -2 2340.57 130.070   3
  -3  -4   2 2393.73 133.483   2
  -3  -4   2 2402.86 128.172   1
  -2  -4   2 1242.30 72.0686   1
   2  -4  -2 1277.44 75.1448   3
   2  -4  -2 1337.49 75.0327   1
  -2  -4   2 1333.76 80.4983   2
  -1  -4   2 345.215 34.4321   2
  -1  -4   2 351.855 25.2680   1
   1  -4  -2 352.494 27.3865   3
   1  -4  -2 297.617 26.5703   1
   0  -4   2 47.0565 22.1937   2
   0  -4   2 14.5714 10.3197   1
   0  -4  -2 27.2609 14.4029   1
   0   4  -2 33.3802 10.5661   1
   1  -4   2 307.700 32.7909   2
   1  -4   2 285.650 21.6199   1
  -1  -4  -2 275.971 25.2461   1
  -1   4  -2 264.225 22.0224   1
  -2  -4  -2 48.0464 22.4035   2
  -2  -4  -2 93.1529 18.5625   1
   2  -4   2 60.3399 22.4513   2
   2  -4   2 110.207 14.9219   1
  -2   4  -2 84.0257 20.1594   3
  -2   4  -2 90.6531 15.1259   1
  -3  -4  -2 26.6910 16.4520   1
   3  -4   2 4.23694 13.9663   1
  -3  -4  -2 -15.423 19.2729   2
   3  -4   2 -11.550 18.8712   2
  -3   4  -2 -16.878 17.2116   3
  -4  -4  -2 -25.613 19.2070   3
   4  -4   2 -17.186 19.1718   2
  -4  -4  -2 8.23870 18.0472   2
   4  -4   2 12.0772 15.9613   1
  -4   4  -2 17.9190 19.3387   3
  -5  -4  -2 78.4427 24.0675   3
  -5  -4  -2 79.2888 20.5518   2
   5  -4   2 33.9513 19.0541   1
   5  -4   2 89.1984 22.1053   2
  -5   4  -2 114.369 24.4964   3
   6  -4   2 50.9141 21.4437   2
   6  -4   2 63.2125 20.7326   1
  -6  -4  -2 85.6687 26.7678   3
  -6  -4  -2 49.9500 19.1408   2
  -6   4  -2 64.6320 25.4077   3
   7  -4   2 -5.4175 20.3866   1
  -7  -4  -2 -17.105 16.8126   2
  -7  -4  -2 -5.0250 25.9055   3
   7  -4   2 10.0311 19.3838   2
  -7   4  -2 -26.631 23.7447   3
   8  -4   2 68.4494 25.2911   1
   8  -4   2 83.2649 22.1789   2
  -8  -4  -2 67.2116 31.1395   3
  -8  -4  -2 74.3073 19.7486   2
  -8   4  -2 91.2859 30.1508   3
   9  -4   2 296.167 32.1305   2
   9  -4   2 322.286 36.7318   1
  -9  -4  -2 336.693 41.7070   2
  -9  -4  -2 265.200 42.2742   3
  -9   4  -2 349.954 43.5275   3
 -10  -4  -2 404.177 49.7641   3
  10  -4   2 441.693 43.6118   1
  10  -4   2 393.299 37.0717   2
 -10   4  -2 466.417 51.3845   3
  11  -4   2 306.977 40.6019   1
 -11  -4  -2 349.184 50.0782   3
 -11   4  -2 385.479 49.7767   3
  12  -4   2 32.0541 30.9506   1
 -12  -4  -2 158.774 43.4962   3
 -12   4  -2 103.419 42.4435   3
 -13  -4  -2 55.9748 43.3634   3
 -13   4  -2 123.303 43.5953   3
 -14   4  -2 32.8104 42.9776   3
 -13  -5   2 45.1771 46.0117   3
  13  -5  -2 78.9811 34.7822   1
 -12  -5   2 122.513 45.2645   3
  12  -5  -2 -23.248 28.9728   1
 -12   5   2 -11.673 35.9963   3
 -11  -5   2 337.261 52.5197   3
  11  -5  -2 425.136 46.1003   1
  11  -5  -2 391.110 42.2821   2
 -11   5   2 368.193 48.4327   3
 -10  -5   2 268.010 46.8614   3
  10  -5  -2 255.133 37.7810   1
  10  -5  -2 265.548 37.1371   2
 -10   5   2 232.210 40.1304   3
   9  -5  -2 37.1564 25.5430   2
  -9  -5   2 -0.0415 33.0196   3
   9  -5  -2 24.0173 25.0280   1
  -9  -5   2 50.7193 23.8152   2
  -9   5   2 47.5070 28.6632   3
   8  -5  -2 41.7713 25.2322   1
  -8  -5   2 60.1373 23.6050   2
  -8  -5   2 -8.8267 29.8512   3
  -8   5   2 -16.159 23.7724   3
  -7  -5   2 117.371 33.1754   3
   7  -5  -2 87.0360 25.5315   1
  -7  -5   2 157.097 28.8008   2
  -7   5   2 125.295 25.6449   3
  -6  -5   2 55.1814 23.5058   2
   6  -5  -2 73.5019 22.8925   1
  -6   5   2 30.6749 19.6402   3
  -5  -5   2 3.82655 21.7463   2
   5  -5  -2 19.8107 20.2606   1
  -5   5   2 19.1441 17.5722   3
   4  -5  -2 14.6072 18.6000   1
  -4  -5   2 20.3677 16.1403   1
  -4  -5   2 66.0331 24.6153   2
   3  -5  -2 0.52303 17.7916   1
  -3  -5   2 6.53417 13.6595   1
  -3  -5   2 -17.576 23.0468   2
  -2  -5   2 -32.442 23.0137   2
   2  -5  -2 18.1114 15.7782   1
  -2  -5   2 21.4416 12.7961   1
  -1  -5   2 57.6652 26.1083   2
   1  -5  -2 31.3554 17.0659   1
  -1  -5   2 41.6335 12.9826   1
   1  -5  -2 16.7680 24.7795   2
   0  -5   2 30.1942 12.5420   1
   0  -5  -2 37.9024 26.2095   2
   0  -5  -2 28.0026 17.0542   1
   0  -5   2 83.8791 24.5962   2
   0   5  -2 44.6779 12.6736   1
  -1  -5  -2 39.9277 23.8398   2
   1  -5   2 30.0054 25.6228   2
   1  -5   2 46.8713 13.4346   1
  -1  -5  -2 34.6029 16.0097   1
  -1   5  -2 24.4768 13.6320   1
   2  -5   2 21.7073 13.8565   1
  -2  -5  -2 33.1289 17.4378   1
  -2  -5  -2 53.5827 26.1037   2
   2  -5   2 12.9786 24.6412   2
  -3  -5  -2 627.361 48.1584   1
   3  -5   2 644.480 43.0304   1
   3  -5   2 657.385 54.3446   2
  -3   5  -2 632.387 51.0305   3
   4  -5   2 1803.68 104.315   1
   4  -5   2 1938.92 112.189   2
  -4  -5  -2 1889.55 108.476   1
  -4  -5  -2 1908.80 110.999   2
  -4   5  -2 1804.39 110.506   3
  -5  -5  -2 289.000 34.1340   2
  -5  -5  -2 315.112 36.5768   3
   5  -5   2 329.814 36.9622   2
   5  -5   2 349.995 30.0881   1
  -5   5  -2 248.996 34.0221   3
  -6  -5  -2 29.2261 27.6044   3
  -6  -5  -2 29.3047 21.3289   2
   6  -5   2 30.9460 24.3670   2
   6  -5   2 20.7082 19.6315   1
  -6   5  -2 13.0305 23.6726   3
  -7  -5  -2 19.5042 29.8417   3
  -7  -5  -2 36.0118 22.0004   2
   7  -5   2 51.1474 22.3035   1
   7  -5   2 83.2870 24.9823   2
  -7   5  -2 33.0036 28.0298   3
  -8  -5  -2 4.42707 19.8097   2
  -8  -5  -2 13.1427 30.1823   3
   8  -5   2 -13.480 21.7169   2
   8  -5   2 -6.5758 20.8634   1
  -8   5  -2 1.85490 29.4186   3
   9  -5   2 31.0908 23.6738   2
  -9  -5  -2 -9.6235 33.5820   3
   9  -5   2 40.9461 24.3192   1
  -9   5  -2 -15.815 30.9370   3
  10  -5   2 0.51712 22.8761   2
  10  -5   2 9.79537 25.0906   1
 -10  -5  -2 -19.121 34.3502   3
 -10   5  -2 -40.798 34.0867   3
  11  -5   2 47.8531 28.6575   1
 -11  -5  -2 65.8627 39.6518   3
 -11   5  -2 -31.122 36.5403   3
  12  -5   2 -10.944 28.0154   1
 -12  -5  -2 35.4505 41.0765   3
 -12   5  -2 -0.5910 40.4434   3
 -13  -5  -2 42.8566 53.4421   3
 -13   5  -2 -1.4430 42.7158   3
 -12  -6   2 -28.993 40.2790   3
  12  -6  -2 -7.5781 30.7475   1
  11  -6  -2 -17.101 30.3024   1
  11  -6  -2 59.3691 32.0516   2
 -11  -6   2 -15.319 41.5126   3
  10  -6  -2 0.42768 28.9518   1
  10  -6  -2 18.3382 30.1882   2
 -10  -6   2 0.49432 37.4838   3
 -10   6   2 -16.250 29.1646   3
  -9  -6   2 25.0460 33.7722   3
   9  -6  -2 1.42634 29.5160   2
   9  -6  -2 -7.9835 24.0476   1
  -9  -6   2 58.2493 26.6718   2
  -9   6   2 0.08127 25.6151   3
  -8  -6   2 24.3422 32.2908   3
   8  -6  -2 1.01445 23.4728   1
  -8  -6   2 23.8853 25.0784   2
   8  -6  -2 1.47141 30.3799   2
  -8   6   2 57.9995 25.8507   3
   7  -6  -2 15.1731 22.0627   1
   7  -6  -2 35.9227 29.7077   2
  -7  -6   2 -13.863 24.8537   2
  -7  -6   2 -13.095 31.1631   3
  -7   6   2 8.99801 21.1153   3
  -6  -6   2 -6.4198 18.6337   1
  -6  -6   2 41.5659 26.6168   2
   6  -6  -2 14.4620 29.2403   2
   6  -6  -2 37.2559 23.1841   1
  -6   6   2 1.29641 19.8482   3
   5  -6  -2 59.2694 24.3880   1
  -5  -6   2 113.336 21.2674   1
  -5  -6   2 122.654 31.3934   2
   5  -6  -2 16.4216 29.8887   2
   4  -6  -2 57.9621 22.1823   1
  -4  -6   2 57.2085 18.5807   1
  -4  -6   2 47.5796 28.1260   2
   4  -6  -2 39.9801 30.1359   2
   3  -6  -2 10.3476 19.4851   1
   3  -6  -2 -36.529 26.8706   2
  -3  -6   2 -7.5795 14.9098   1
  -3  -6   2 23.3337 28.2438   2
  -2  -6   2 95.7487 17.8381   1
   2  -6  -2 203.284 23.6267   1
   2  -6  -2 32.7651 30.0717   2
  -2  -6   2 142.671 34.3826   2
   1  -6  -2 123.526 21.4452   1
   1  -6  -2 143.377 30.7656   2
  -1  -6   2 155.004 34.5352   2
   0  -6   2 -6.3553 29.0275   2
   0  -6  -2 -2.7057 17.6546   1
   0  -6   2 2.83733 13.4095   1
   0  -6  -2 28.8128 29.7077   2
   1  -6   2 1.74913 28.1404   2
   1  -6   2 -6.5283 13.9835   1
  -1  -6  -2 8.68428 28.8700   2
  -1  -6  -2 -9.7541 17.8112   1
  -2  -6  -2 -6.9418 18.3187   1
  -2  -6  -2 -27.852 27.6442   2
   2  -6   2 23.4357 28.2255   2
   2  -6   2 35.6101 15.5746   1
  -3  -6  -2 28.0997 27.1731   2
   3  -6   2 48.4070 16.5258   1
  -3  -6  -2 35.4787 20.0494   1
   3  -6   2 29.1727 29.6208   2
  -4  -6  -2 29.3705 27.1732   2
  -4  -6  -2 42.3845 21.4934   1
   4  -6   2 6.71807 17.1984   1
   4  -6   2 -4.2571 26.6306   2
  -4  -6  -2 -0.2101 27.1132   3
   5  -6   2 57.2322 28.8853   2
  -5  -6  -2 40.7713 23.3540   1
  -5  -6  -2 89.8567 27.3622   2
   5  -6   2 51.2249 19.6317   1
  -5  -6  -2 25.2748 26.8881   3
  -5   6  -2 28.9928 24.9153   3
  -6  -6  -2 35.1178 29.0396   3
   6  -6   2 2.42661 19.3839   1
  -6  -6  -2 35.6043 24.6543   2
  -6  -6  -2 28.7529 23.3644   1
   6  -6   2 34.4802 29.0723   2
  -6   6  -2 -25.867 24.1519   3
  -7  -6  -2 -28.566 22.3069   2
  -7  -6  -2 26.0955 30.6264   3
   7  -6   2 9.46075 27.8707   2
   7  -6   2 31.3461 21.3222   1
  -7   6  -2 -48.982 26.8196   3
  -8  -6  -2 -15.616 30.9702   3
  -8  -6  -2 -8.0280 23.3910   2
   8  -6   2 7.28992 28.0962   2
   8  -6   2 -3.0943 22.0825   1
  -8   6  -2 33.7324 31.3895   3
   9  -6   2 160.349 34.3238   2
  -9  -6  -2 106.488 38.1331   3
   9  -6   2 199.592 29.6186   1
  -9   6  -2 106.323 38.1859   3
  10  -6   2 67.1393 28.1875   1
 -10  -6  -2 25.7108 39.0838   3
  10  -6   2 30.2561 27.5227   2
 -10   6  -2 77.1184 38.7338   3
 -11  -6  -2 30.5916 36.9835   3
  11  -6   2 2.92532 26.2461   1
 -11   6  -2 80.3280 43.2564   3
 -12  -6  -2 53.9267 44.9047   3
  12  -6   2 -20.546 29.0735   1
 -12   6  -2 -9.7231 42.7255   3
 -11  -7   2 22.8192 56.0541   3
  11  -7  -2 20.1002 30.0253   1
 -10  -7   2 30.0460 37.9558   3
  10  -7  -2 100.172 38.9771   2
  10  -7  -2 215.226 35.2716   1
  -9  -7   2 116.028 38.4326   3
  -9  -7   2 115.338 33.5648   2
   9  -7  -2 159.300 33.1818   1
   9  -7  -2 135.913 41.0665   2
   8  -7  -2 97.6258 27.9132   1
  -8  -7   2 22.5988 34.9892   3
  -8  -7   2 118.373 32.4092   2
   8  -7  -2 72.3509 37.1763   2
   7  -7  -2 48.8139 34.6349   2
  -7  -7   2 -15.283 27.4128   2
  -7  -7   2 35.4654 35.3195   3
   7  -7  -2 34.1791 25.4073   1
  -6  -7   2 20.9671 29.6007   2
   6  -7  -2 -2.9167 32.4616   2
  -6  -7   2 52.5400 35.0644   1
   6  -7  -2 24.3404 23.1761   1
   5  -7  -2 0.53486 23.4604   1
  -5  -7   2 8.68016 19.7261   1
   5  -7  -2 63.3091 35.0926   2
  -5  -7   2 -2.2001 28.5788   2
   4  -7  -2 -32.490 21.1005   1
   4  -7  -2 22.5035 32.0894   2
  -4  -7   2 1.41511 17.2755   1
  -4  -7   2 3.20532 29.9281   2
   3  -7  -2 21.5017 30.5174   2
   3  -7  -2 49.6111 21.9567   1
  -3  -7   2 -3.4152 30.4884   2
  -3  -7   2 7.97944 16.8067   1
  -2  -7   2 27.6257 30.9559   2
   2  -7  -2 25.6430 20.1156   1
  -2  -7   2 -4.0465 15.9105   1
   2  -7  -2 36.9650 33.9520   2
  -1  -7   2 -11.441 31.2274   2
   1  -7  -2 8.81092 19.2735   1
  -1  -7   2 27.8600 16.3201   1
   1  -7  -2 28.8985 34.0445   2
   0  -7   2 -5.1720 14.8007   1
   0  -7   2 -8.7387 30.7711   2
   0  -7  -2 -24.537 30.6673   2
   0  -7  -2 -9.6511 18.9294   1
   1  -7   2 70.9706 18.2695   1
  -1  -7  -2 72.4479 31.2117   2
   1  -7   2 139.306 38.0273   2
  -1  -7  -2 39.0183 21.6357   1
  -2  -7  -2 196.070 39.1562   2
  -2  -7  -2 249.597 32.1758   1
   2  -7   2 289.703 26.8812   1
   2  -7   2 331.359 46.1545   2
   3  -7   2 363.622 47.8735   2
  -3  -7  -2 419.749 39.0271   1
   3  -7   2 473.039 36.8545   1
   4  -7   2 299.752 28.4066   1
  -4  -7  -2 200.234 29.9326   1
   4  -7   2 194.418 40.5818   2
  -4  -7  -2 192.266 33.8382   3
  -4  -7  -2 206.482 37.0583   2
   5  -7   2 194.133 25.2551   1
   5  -7   2 97.2576 34.4375   2
  -5  -7  -2 174.406 35.3240   2
  -5  -7  -2 108.605 28.3648   1
  -5  -7  -2 162.639 34.5459   3
   6  -7   2 140.590 25.6193   1
  -6  -7  -2 180.485 30.4723   1
  -6  -7  -2 52.1068 32.9413   3
  -6  -7  -2 129.301 32.6082   2
   6  -7   2 136.523 37.3093   2
  -7  -7  -2 85.1669 34.5882   3
  -7  -7  -2 -21.308 25.3837   2
  -7  -7  -2 9.50753 25.2847   1
   7  -7   2 -44.684 20.9012   1
   7  -7   2 17.6054 31.8933   2
  -7   7  -2 31.1328 31.4562   3
  -8  -7  -2 17.1110 26.8082   2
   8  -7   2 18.0061 23.6564   1
  -8  -7  -2 39.1688 32.4929   3
  -8  -7  -2 80.2381 28.6782   1
   8  -7   2 52.3865 34.0614   2
  -8   7  -2 56.1843 33.7059   3
  -9  -7  -2 -24.730 35.4336   3
  -9  -7  -2 22.0394 26.2789   1
   9  -7   2 -68.906 29.2559   2
   9  -7   2 -43.530 24.4634   1
  -9   7  -2 48.9072 35.7741   3
  10  -7   2 -11.648 26.9414   1
  10  -7   2 -19.779 46.1454   2
 -10  -7  -2 -25.381 34.0849   3
 -10   7  -2 -40.349 37.2211   3
  -9  -8   2 6.42561 38.3288   3
   9  -8  -2 1.08046 38.9950   2
   9  -8  -2 -4.8863 28.2746   1
  -8  -8   2 0.58928 30.9360   2
   8  -8  -2 16.8043 27.9281   1
  -8  -8   2 -42.150 34.1420   3
   8  -8  -2 -68.415 36.8541   2
  -7  -8   2 -22.804 31.7124   2
   7  -8  -2 -31.647 24.7078   1
  -7  -8   2 18.0077 33.7611   3
   7  -8  -2 36.6476 40.7383   2
   6  -8  -2 42.7680 40.6508   2
   6  -8  -2 50.6032 25.7912   1
  -6  -8   2 16.1203 30.7547   2
  -5  -8   2 -42.180 28.5103   2
   5  -8  -2 47.8001 41.2653   2
   5  -8  -2 20.7979 24.0925   1
   4  -8  -2 230.455 32.0253   1
   4  -8  -2 132.787 44.3388   2
  -4  -8   2 233.737 43.6350   2
  -3  -8   2 274.800 43.8316   2
   3  -8  -2 275.904 33.7013   1
   3  -8  -2 179.132 46.1352   2
   2  -8  -2 6.33049 22.0445   1
  -2  -8   2 75.1915 33.4428   2
   2  -8  -2 72.4349 36.7183   2
   1  -8  -2 7.82907 33.3745   2
  -1  -8   2 17.0768 35.3843   2
   1  -8  -2 21.7512 21.1326   1
   0  -8  -2 61.2385 37.3911   2
   0  -8  -2 2.68652 21.1577   1
   0  -8   2 37.8543 35.0193   2
  -1  -8  -2 13.9491 33.0560   2
  -1  -8  -2 1.47255 22.6489   1
   1  -8   2 -13.074 35.3022   2
   2  -8   2 30.0205 35.9390   2
  -2  -8  -2 -46.916 22.4021   1
  -2  -8  -2 -10.594 33.6523   2
  -3  -8  -2 22.9006 24.6280   1
   3  -8   2 -29.562 34.7501   2
  -3  -8  -2 24.0850 32.4906   2
  -4  -8  -2 -25.086 26.8414   3
  -4  -8  -2 -24.204 22.2453   1
   4  -8   2 1.00033 34.8389   2
  -4  -8  -2 28.8685 31.6108   2
  -5  -8  -2 -40.939 29.6090   3
  -5  -8  -2 -2.6579 23.7843   1
   5  -8   2 23.6748 36.7715   2
  -5  -8  -2 6.82268 31.9903   2
  -6  -8  -2 -13.937 27.7343   2
  -6  -8  -2 -15.402 30.3930   3
  -6  -8  -2 -8.7160 29.3045   1
   6  -8   2 -18.476 36.7708   2
  -7  -8  -2 97.7297 34.0617   2
   7  -8   2 100.870 41.1358   2
  -7  -8  -2 28.7708 33.6625   3
   8  -8   2 4.39067 35.3712   2
  -8  -8  -2 33.4805 36.6614   3
  -9  -8  -2 3.86216 36.5421   3
   9  -8   2 -28.263 34.4335   2
  -6  -9   2 -20.311 33.8287   2
   6  -9  -2 27.8656 42.5328   2
  -5  -9   2 -17.903 35.4430   2
   5  -9  -2 -8.5325 40.8077   2
   4  -9  -2 105.461 42.5687   2
  -4  -9   2 38.7206 37.9836   2
   3  -9  -2 -35.710 38.0755   2
  -3  -9   2 33.3406 37.0146   2
  -2  -9   2 -10.034 35.3901   2
   2  -9  -2 -41.055 32.9546   2
   1  -9  -2 -3.9344 35.6816   2
  -1  -9   2 10.8903 38.4991   2
   0  -9   2 24.8257 36.9067   2
   0  -9  -2 -19.030 36.0381   2
   1  -9   2 48.8657 38.7732   2
  -1  -9  -2 50.1209 36.0117   2
   2  -9   2 -28.068 39.8459   2
  -2  -9  -2 72.1081 39.8113   2
   3  -9   2 -41.459 39.7337   2
  -3  -9  -2 -30.000 33.9682   2
  -4  -9  -2 -63.114 29.6292   3
   4  -9   2 -37.219 36.8005   2
  -4  -9  -2 18.0223 35.3657   2
   5  -9   2 -21.538 38.0197   2
  -5  -9  -2 -20.861 31.5210   3
  -5  -9  -2 -13.242 31.1848   2
  -6  -9  -2 -14.876 33.4097   3
  -6  -9  -2 28.5815 33.6094   2
   6  -9   2 67.2479 45.1272   2
 -16   0   3 -90.997 32.0451   3
 -15   0   3 -23.254 33.8751   3
 -14   0   3 -5.9379 31.2411   3
 -13   0   3 19.9928 28.7725   3
  12   0  -3 -21.531 25.5157   1
 -12   0   3 9.41376 25.6163   3
 -11   0   3 8.46330 24.9194   3
  11   0  -3 -13.475 24.8946   1
 -10   0   3 1.58933 21.3703   3
  10   0  -3 9.57370 19.7423   1
  -9   0   3 8.63969 19.5580   3
   9   0  -3 1.24387 20.5761   1
   9   0  -3 -17.342 17.0227   2
  -8   0   3 -0.3955 17.3719   3
   8   0  -3 -5.3775 19.1727   2
   8   0  -3 2.13017 15.7018   1
   7   0  -3 0.32932 20.8600   2
   7   0  -3 -23.992 16.1566   1
  -7   0   3 1.71932 15.9450   3
  -7   0   3 28.2913 15.6565   2
   6   0  -3 8.20287 14.4541   1
  -6   0   3 21.2211 15.4455   2
   6   0  -3 -13.156 23.1101   2
  -6   0   3 10.8752 15.6654   3
   5   0  -3 30.7179 16.2741   3
  -5   0   3 16.3663 16.1646   2
   5   0  -3 -26.765 24.0480   2
   5   0  -3 4.15626 13.7767   1
  -5   0   3 5.19325 14.0865   3
   4   0  -3 -32.220 24.4135   2
  -4   0   3 -6.0104 17.8149   2
   4   0  -3 -13.226 15.9215   3
   4   0  -3 12.3777 14.6337   1
  -4   0   3 -4.1521 14.5760   1
  -4   0   3 8.23543 13.1158   3
  -3   0   3 0.80530 13.3852   3
  -3   0   3 30.7822 14.0122   1
   3   0  -3 -26.540 27.2328   2
  -3   0   3 -32.898 21.9924   2
   3   0  -3 -1.0723 12.3570   1
  -2   0   3 34.5275 22.0491   2
   2   0  -3 37.7603 24.4525   2
  -2   0   3 10.9501 11.0553   1
   2   0  -3 10.6078 11.2490   1
   1   0  -3 28.2396 19.9380   2
  -1   0   3 14.2414 20.4354   2
  -1   0   3 12.9899 9.01680   1
   1   0  -3 -6.3258 9.57129   1
   0   0   3 -12.081 8.85391   3
   0   0  -3 5.76962 9.34222   3
   0   0   3 -0.2100 21.6777   2
   0   0  -3 2.81814 8.49542   1
   0   0  -3 23.8694 21.3282   2
   0   0   3 -2.8839 7.88851   1
  -1   0  -3 9.07195 16.2985   2
   1   0   3 22.6900 20.6220   2
   1   0   3 10.2899 11.6836   3
  -1   0  -3 -12.344 10.9643   3
   2   0   3 10.1216 19.4652   2
  -2   0  -3 10.7424 13.5767   3
  -2   0  -3 -12.811 11.3885   2
   2   0   3 17.8156 14.3345   3
  -3   0  -3 -10.972 14.3209   3
   3   0   3 -15.069 15.3188   2
  -3   0  -3 17.7765 8.01146   2
   3   0   3 21.9837 15.6733   3
  -4   0  -3 3.61280 15.3363   3
  -5   0  -3 -2.0207 15.1854   3
  -6   0  -3 7.46982 16.9359   3
  -7   0  -3 -18.419 17.0304   3
  -8   0  -3 29.7244 21.1354   3
  -9   0  -3 -28.277 21.1927   3
 -10   0  -3 -2.8720 24.1787   3
 -11   0  -3 23.9913 26.7623   3
 -12   0  -3 -42.026 26.4486   3
 -13   0  -3 27.0054 31.4472   3
 -14   0  -3 -14.769 33.8906   3
 -15   0  -3 -57.193 34.0914   3
 -15  -1   3 69.3268 34.9487   3
 -15   1   3 17.8947 34.2851   3
 -14  -1   3 29.0782 32.6690   3
 -14   1   3 -6.8226 30.7669   3
 -13  -1   3 126.266 35.0125   3
  13  -1  -3 91.2473 32.0156   1
 -13   1   3 114.768 33.5814   3
  12  -1  -3 322.430 39.7382   1
 -12  -1   3 264.061 40.5356   3
 -12   1   3 376.093 41.7886   3
 -11  -1   3 10.0622 24.6591   3
  11  -1  -3 -2.0768 21.8516   1
 -11   1   3 -26.409 23.3126   3
 -10  -1   3 153.510 29.5095   3
 -10  -1   3 168.590 21.2405   2
  10  -1  -3 143.670 27.2860   1
 -10   1   3 152.995 28.9670   3
  -9  -1   3 30.7322 21.4966   3
  -9  -1   3 20.5096 16.3146   2
   9  -1  -3 15.5208 21.5380   1
   9   1  -3 1.36899 21.0509   1
  -9   1   3 46.6997 21.3631   3
   9   1  -3 42.9532 14.6943   2
  -8  -1   3 101.823 20.3547   2
   8  -1  -3 77.1166 21.8679   1
   8  -1  -3 130.048 26.1078   2
  -8  -1   3 118.068 23.8650   3
  -8   1   3 92.3548 21.0947   3
   8   1  -3 88.2873 16.6298   2
   8   1  -3 132.749 23.3398   1
  -7  -1   3 18.9480 17.4987   3
  -7  -1   3 43.3037 20.2624   2
   7  -1  -3 28.2988 19.1300   1
   7  -1  -3 22.0924 19.5674   2
  -7   1   3 11.8118 16.4928   3
   7   1  -3 -10.963 17.4376   1
   7   1  -3 21.8198 14.1295   2
   6  -1  -3 -10.974 15.8311   1
  -6  -1   3 8.24448 23.7091   2
  -6  -1   3 -0.7147 15.8257   3
   6  -1  -3 6.42960 17.2947   2
   6   1  -3 -1.7117 13.7383   2
  -6   1   3 16.9603 15.0352   3
   6   1  -3 25.1734 14.8155   1
  -5  -1   3 -3.4775 23.1578   2
   5  -1  -3 -10.344 12.9945   3
  -5  -1   3 18.6856 16.3433   3
   5  -1  -3 -10.129 16.3627   1
   5  -1  -3 -18.775 15.1584   2
  -5  -1   3 4.83219 14.1191   1
   5   1  -3 -11.281 13.8604   2
  -5   1   3 -6.4543 13.5614   3
   5   1  -3 1.89287 13.8446   1
   4  -1  -3 89.5685 14.8170   3
  -4  -1   3 132.186 20.6750   3
  -4  -1   3 96.7121 23.5160   2
   4  -1  -3 92.5132 18.8234   2
  -4  -1   3 118.223 16.7260   1
   4  -1  -3 113.227 17.4353   1
  -4   1   3 112.912 15.6832   3
   4   1  -3 91.5383 14.8223   1
   4   1  -3 92.0008 17.9288   2
  -4   1   3 97.5605 18.8129   1
   3  -1  -3 110.272 12.9595   3
   3  -1  -3 107.491 17.9738   2
  -3  -1   3 148.466 21.8807   2
  -3  -1   3 96.8796 13.5412   1
   3  -1  -3 120.008 16.6357   1
  -3   1   3 96.9460 12.7982   3
   3   1  -3 86.0541 14.1296   1
  -3   1   3 108.319 17.3071   1
   3   1  -3 85.6135 18.2835   2
  -2  -1   3 -7.8809 9.56166   1
  -2  -1   3 -9.0687 15.6758   2
   2  -1  -3 14.3238 14.6007   1
   2  -1  -3 1.18316 7.53410   3
   2  -1  -3 -5.8425 16.0731   2
  -2   1   3 -9.1399 13.5599   1
   2   1  -3 21.9712 15.9053   2
  -2   1   3 -1.3453 7.47560   3
   2   1  -3 1.52899 9.48833   1
   1  -1  -3 97.4575 15.1361   1
  -1  -1   3 76.5754 7.88935   1
  -1  -1   3 102.726 16.7495   2
   1   1  -3 96.7967 17.0586   2
  -1   1   3 67.5925 12.2032   1
   1   1  -3 96.6032 8.22428   1
   0  -1  -3 6.38917 12.2248   1
   0  -1  -3 15.4311 7.82214   3
   0  -1   3 5.36253 11.9119   3
   0  -1   3 13.3174 13.6931   2
   0   1   3 15.0134 11.5538   1
   0   1  -3 12.7140 13.2709   3
   0   1   3 0.29742 7.99612   3
   0   1  -3 -5.9902 13.3736   2
   1  -1   3 5.15992 13.3428   2
   1  -1   3 -7.7937 14.4193   3
  -1  -1  -3 9.60248 11.0969   3
  -1   1  -3 10.5618 15.3893   3
  -1   1  -3 5.06035 8.38704   1
  -1   1  -3 -1.9739 12.9266   2
   1   1   3 3.97258 10.7700   3
   2  -1   3 3819.51 204.493   2
   2  -1   3 3954.96 206.622   3
  -2  -1  -3 3891.40 205.052   3
  -2   1  -3 3952.13 203.876   1
  -2   1  -3 3824.03 204.291   2
  -2   1  -3 3898.36 206.558   3
   2   1   3 3888.90 204.950   3
   3  -1   3 2044.35 108.964   2
   3  -1   3 1993.53 112.523   3
  -3  -1  -3 1986.12 111.343   3
   3   1   3 2067.78 111.381   3
  -3   1  -3 2039.28 109.577   1
  -3   1  -3 2047.22 109.096   2
  -3   1  -3 2048.24 112.757   3
  -4  -1  -3 308.746 20.3438   2
   4  -1   3 286.725 23.7709   2
  -4  -1  -3 292.985 26.4577   3
  -4   1  -3 304.220 24.9518   1
  -4   1  -3 301.282 27.7375   3
  -5  -1  -3 143.444 21.9118   3
   5  -1   3 156.741 15.3843   2
  -5   1  -3 187.464 23.6124   3
   6  -1   3 -3.7221 9.24147   2
  -6  -1  -3 1.42480 16.6000   3
  -6   1  -3 26.5171 18.9682   3
  -7  -1  -3 87.2131 22.1059   3
   7  -1   3 66.3170 10.9956   2
  -7   1  -3 94.1841 22.3544   3
  -8  -1  -3 8.39958 21.5323   3
  -8   1  -3 12.0724 21.4726   3
  -9  -1  -3 53.7744 24.6087   3
  -9   1  -3 18.6651 23.4007   3
 -10  -1  -3 48.9736 25.5829   3
 -10   1  -3 38.4843 25.9100   3
 -11  -1  -3 -4.2328 26.7868   3
 -11   1  -3 0.08912 27.0025   3
 -12  -1  -3 -7.3574 29.0801   3
 -12   1  -3 -32.309 28.3678   3
 -13  -1  -3 -9.9195 32.8326   3
 -13   1  -3 47.0068 34.0949   3
 -14  -1  -3 9.60283 35.2915   3
 -14   1  -3 7.59436 34.9371   3
 -15  -1  -3 -60.681 38.2394   3
 -15   1  -3 23.2322 38.2073   3
 -15  -2   3 -62.325 34.7250   3
  15  -2  -3 32.9924 29.5301   1
 -15   2   3 -33.521 33.8412   3
  14  -2  -3 5.19351 25.1535   1
 -14  -2   3 20.9059 34.5145   3
 -14   2   3 -3.0936 33.6251   3
 -13  -2   3 3.21132 31.2583   3
  13  -2  -3 6.27800 30.2491   1
 -13   2   3 8.90359 31.4414   3
 -12  -2   3 2.46867 28.3674   3
  12  -2  -3 -11.066 27.8555   1
 -12   2   3 60.0348 30.1497   3
 -11  -2   3 19.9834 27.2829   3
  11  -2  -3 -12.813 26.5091   1
 -11   2   3 -20.714 25.4281   3
 -10  -2   3 63.4078 27.2982   3
  10  -2  -3 50.6142 24.9123   1
 -10  -2   3 86.7140 22.1077   2
 -10   2   3 57.7256 25.4380   3
   9  -2  -3 140.436 26.5699   1
  -9  -2   3 172.445 29.5131   2
  -9  -2   3 146.283 28.3170   3
  -9   2   3 159.992 28.0632   3
   9   2  -3 168.072 22.7342   2
  -8  -2   3 -19.430 21.0539   3
   8  -2  -3 7.42326 19.2036   1
  -8  -2   3 10.3536 25.5306   2
  -8   2   3 -1.5207 19.1890   3
   8   2  -3 -2.5393 13.7407   2
   7  -2  -3 0.10228 18.8663   1
  -7  -2   3 42.6205 22.4972   2
  -7  -2   3 -3.6220 19.5993   3
  -7   2   3 28.2204 19.0783   3
   7   2  -3 39.5405 14.6775   2
  -6  -2   3 294.566 28.8151   2
   6  -2  -3 243.038 28.2836   1
  -6  -2   3 243.657 28.7601   3
   6   2  -3 298.685 25.5128   2
  -6   2   3 310.260 27.8266   3
   5  -2  -3 1886.58 110.444   1
   5  -2  -3 2030.17 108.805   3
  -5  -2   3 1942.81 110.341   2
  -5  -2   3 2008.81 108.370   1
  -5  -2   3 2026.53 113.725   3
   5   2  -3 1958.81 109.650   2
  -5   2   3 2070.09 110.306   3
  -4  -2   3 656.621 45.3103   2
   4  -2  -3 638.199 42.8307   3
   4  -2  -3 722.551 46.3896   1
  -4  -2   3 723.212 42.3088   1
  -4   2   3 713.666 44.8317   3
   4   2  -3 732.597 46.4966   2
   3  -2  -3 42.7352 15.4699   1
   3  -2  -3 29.6165 10.7319   3
  -3  -2   3 45.7452 10.1708   1
  -3  -2   3 40.2658 17.4586   2
  -3   2   3 49.5470 16.2099   1
   3   2  -3 51.8574 17.1115   2
  -3   2   3 40.5209 12.4439   3
   2  -2  -3 41.1846 14.5857   1
  -2  -2   3 51.6997 8.58080   1
   2  -2  -3 17.5475 10.0629   3
  -2  -2   3 70.8266 18.2581   2
  -2   2   3 32.5585 9.71784   3
  -2   2   3 26.3975 15.5395   1
   2   2  -3 46.0935 17.6641   2
   1  -2  -3 480.121 28.7404   3
   1  -2  -3 454.374 34.4404   1
  -1  -2   3 524.398 37.7204   2
  -1   2   3 466.793 33.7554   1
   1   2  -3 418.502 34.3378   2
   0  -2   3 236.069 22.7684   3
   0  -2   3 252.153 25.2407   2
   0  -2   3 274.820 15.1895   1
   0  -2  -3 170.478 20.4146   1
   0   2  -3 241.208 15.8990   1
   0   2  -3 286.030 26.1464   2
   0   2   3 243.938 22.1122   1
   1  -2   3 66.5493 17.6376   3
   1  -2   3 80.5542 18.9855   2
   1  -2   3 94.0164 11.0332   1
  -1  -2  -3 110.743 16.1764   3
  -1  -2  -3 70.6032 16.8190   1
  -1   2  -3 108.990 18.8129   3
  -1   2  -3 86.3446 18.4571   2
  -1   2  -3 142.998 11.7308   1
   2  -2   3 -5.9077 15.8213   3
  -2  -2  -3 16.4487 13.7722   3
   2  -2   3 -5.7141 10.9739   1
   2  -2   3 -4.4073 15.9781   2
  -2   2  -3 10.8532 11.4272   1
  -2   2  -3 -8.2683 16.4778   2
  -2   2  -3 0.95034 16.5844   3
   3  -2   3 17.6668 14.8002   2
   3  -2   3 7.56798 13.0941   1
  -3  -2  -3 16.6537 15.3789   3
  -3   2  -3 28.0004 13.5415   1
  -3   2  -3 5.31062 14.1434   2
  -3   2  -3 36.2369 17.8416   3
   3   2   3 47.7843 15.9732   3
  -4  -2  -3 29.2668 17.3319   3
   4  -2   3 12.8249 14.8161   1
  -4  -2  -3 6.78478 12.4701   2
   4  -2   3 -2.4962 14.3895   2
  -4   2  -3 7.64999 17.3607   3
  -5  -2  -3 107.745 21.1512   3
  -5  -2  -3 133.274 14.6578   2
   5  -2   3 116.733 17.6183   2
   5  -2   3 108.932 19.6438   1
  -5   2  -3 101.098 21.8096   3
   6  -2   3 39.1625 14.0739   2
  -6  -2  -3 40.3625 10.3538   2
   6  -2   3 33.3038 17.8758   1
  -6  -2  -3 0.19559 19.2157   3
  -6   2  -3 23.9389 20.8643   3
  -7  -2  -3 50.3735 21.8015   3
  -7  -2  -3 57.9983 10.3277   2
   7  -2   3 107.323 22.2119   1
   7  -2   3 60.9611 14.7812   2
  -7   2  -3 96.5799 24.4665   3
   8  -2   3 29.7688 13.5540   2
  -8  -2  -3 -6.3613 21.9640   3
  -8   2  -3 8.88007 23.3680   3
   9  -2   3 310.901 27.5591   2
  -9  -2  -3 312.480 38.3220   3
  -9   2  -3 349.641 39.3068   3
 -10  -2  -3 682.508 56.6789   3
 -10   2  -3 555.220 53.1484   3
 -11  -2  -3 29.2541 30.5209   3
 -11   2  -3 23.2699 29.4443   3
 -12  -2  -3 21.4553 32.7460   3
 -12   2  -3 27.2834 31.6769   3
 -13  -2  -3 12.8733 35.1808   3
 -13   2  -3 -54.200 30.5704   3
 -14  -2  -3 58.6622 40.5503   3
 -14   2  -3 81.4095 38.7319   3
 -15   2  -3 -57.760 36.7683   3
 -15  -3   3 -73.658 36.6625   3
 -15   3   3 87.9122 41.8124   3
  14  -3  -3 -9.8374 32.7866   1
 -14  -3   3 10.5594 35.3273   3
 -14   3   3 -0.5143 35.8464   3
 -13  -3   3 -52.871 31.9049   3
  13  -3  -3 31.5425 33.2398   1
 -13   3   3 56.4994 34.8804   3
 -12  -3   3 -24.602 30.6460   3
  12  -3  -3 9.50141 30.3800   1
 -12   3   3 13.3200 31.2782   3
 -11  -3   3 3.59405 30.9805   3
  11  -3  -3 -41.735 25.0035   1
 -11   3   3 15.4350 29.4040   3
 -10  -3   3 -10.207 26.5983   3
  10  -3  -3 14.0867 25.2601   1
 -10  -3   3 -19.361 28.2211   2
 -10   3   3 -22.331 26.7957   3
  -9  -3   3 35.6566 25.8423   2
  -9  -3   3 32.1117 26.9599   3
   9  -3  -3 58.3882 26.1531   1
  -9   3   3 74.7409 26.6638   3
   8  -3  -3 126.373 27.0612   1
  -8  -3   3 143.468 25.7010   2
  -8  -3   3 174.685 30.5414   3
  -8   3   3 126.882 27.1335   3
  -7  -3   3 84.1701 26.0067   3
   7  -3  -3 94.8683 21.8916   1
  -7  -3   3 124.794 22.1932   2
  -7   3   3 103.526 23.3468   3
  -6  -3   3 24.5443 17.0278   2
   6  -3  -3 -12.402 17.0930   1
  -6  -3   3 -3.9475 21.3829   3
  -6   3   3 -32.407 16.9417   3
  -5  -3   3 44.4203 17.2685   2
   5  -3  -3 4.44620 17.7793   1
  -5  -3   3 -9.6057 11.4298   1
   5  -3  -3 9.13719 13.0747   3
  -5   3   3 -1.0397 14.9797   3
  -4  -3   3 35.3537 17.7940   2
   4  -3  -3 15.1290 13.2284   3
   4  -3  -3 27.3246 17.6528   1
  -4  -3   3 11.3922 10.7870   1
  -4   3   3 14.8844 13.3336   3
   3  -3  -3 70.4155 13.5511   3
  -3  -3   3 76.7944 19.9632   2
  -3  -3   3 50.9917 10.4863   1
   3  -3  -3 63.6719 17.6930   1
  -3   3   3 33.4180 12.8042   3
   2  -3  -3 21.8624 15.2113   1
   2  -3  -3 0.51607 11.5568   3
  -2  -3   3 26.4643 19.0088   2
   1  -3  -3 98.4410 17.0302   1
  -1  -3   3 110.659 10.1959   1
  -1  -3   3 111.551 22.3321   2
   1  -3  -3 92.1685 13.4311   3
  -1   3   3 163.225 19.4932   1
   0  -3   3 335.093 22.8673   1
   0  -3   3 394.720 33.5951   2
   0  -3  -3 400.163 30.8602   1
   0   3  -3 377.931 23.5080   1
   0   3   3 393.746 30.7029   1
   1  -3   3 283.375 20.5530   1
   1  -3   3 225.097 26.8184   2
  -1  -3  -3 276.958 25.4536   1
  -1   3  -3 290.600 26.8241   3
  -1   3  -3 260.983 21.4806   1
  -2  -3  -3 -4.8993 15.2399   3
   2  -3   3 40.5924 18.3560   2
  -2  -3  -3 -19.300 14.4272   1
   2  -3   3 45.6706 12.2980   1
  -2   3  -3 37.3009 10.9841   1
  -2   3  -3 31.2765 17.8167   3
   3  -3   3 65.6986 19.3865   2
  -3  -3  -3 99.1855 19.2231   3
   3  -3   3 123.467 16.4629   1
  -3   3  -3 120.522 15.9253   1
  -3   3  -3 100.058 21.2912   3
   4  -3   3 7.62138 16.7448   2
  -4  -3  -3 1.44349 18.2148   3
   4  -3   3 21.0683 15.0864   1
  -4  -3  -3 -16.796 15.9059   2
  -4   3  -3 2.24409 19.1427   3
   5  -3   3 4.14967 15.2875   2
  -5  -3  -3 -5.0058 19.9621   3
  -5  -3  -3 -14.547 14.1507   2
   5  -3   3 21.1062 16.5689   1
  -5   3  -3 9.89195 19.7577   3
   6  -3   3 67.3344 18.9986   2
   6  -3   3 109.340 20.3682   1
  -6  -3  -3 81.0273 16.1997   2
  -6  -3  -3 60.5417 24.1001   3
  -6   3  -3 72.2095 24.5742   3
  -7  -3  -3 20.7301 24.4880   3
   7  -3   3 19.0262 16.2236   2
  -7  -3  -3 27.5822 14.0595   2
   7  -3   3 38.1924 21.6027   1
  -7   3  -3 55.3032 25.1231   3
  -8  -3  -3 24.3680 25.2275   3
   8  -3   3 -1.0882 15.7685   2
  -8  -3  -3 -2.6296 13.1701   2
   8  -3   3 -31.442 20.9069   1
  -8   3  -3 -28.709 24.4364   3
   9  -3   3 8.69521 15.8543   2
   9  -3   3 -27.996 22.2651   1
  -9  -3  -3 -18.460 25.9844   3
  -9   3  -3 26.0420 28.1481   3
 -10  -3  -3 37.1602 30.0896   3
 -10   3  -3 7.37311 29.4503   3
 -11  -3  -3 -18.971 31.8068   3
 -11   3  -3 -13.148 31.4175   3
 -12  -3  -3 -1.4509 35.4091   3
 -12   3  -3 -93.994 31.4098   3
 -13  -3  -3 -67.359 35.7259   3
 -13   3  -3 28.8431 36.8572   3
 -14  -3  -3 -36.546 38.3826   3
 -14   3  -3 38.9677 38.0601   3
 -14  -4   3 52.6463 41.0128   3
  14  -4  -3 0.83954 33.7508   1
 -14   4   3 57.5154 46.1028   3
  13  -4  -3 -41.912 31.3212   1
 -13  -4   3 -7.2207 36.1545   3
 -13   4   3 37.6905 38.1561   3
 -12  -4   3 -27.587 34.6976   3
  12  -4  -3 18.0820 29.5979   1
 -12   4   3 32.0321 35.2547   3
 -11  -4   3 -9.4621 33.5471   3
  11  -4  -3 -4.4437 28.3447   1
 -11   4   3 9.65790 32.4242   3
 -10  -4   3 18.0354 31.0626   3
 -10  -4   3 30.4827 27.6940   2
  10  -4  -3 60.1992 28.5338   1
 -10   4   3 36.4737 31.0073   3
  -9  -4   3 60.6711 30.8516   3
  -9  -4   3 11.1807 23.0082   2
   9  -4  -3 0.61417 24.2852   1
  -9   4   3 53.0610 28.0637   3
   8  -4  -3 63.3253 24.4210   1
  -8  -4   3 74.5844 22.4554   2
  -8  -4   3 85.6825 28.6341   3
  -8   4   3 35.4338 24.2004   3
  -7  -4   3 18.6516 26.4469   3
   7  -4  -3 -1.0044 21.0619   1
  -7  -4   3 19.5984 19.6596   2
  -7   4   3 -7.9255 19.4785   3
  -6  -4   3 433.620 38.6039   2
   6  -4  -3 432.159 37.2467   1
  -6   4   3 394.662 34.2848   3
  -5  -4   3 1306.67 81.9961   2
   5  -4  -3 1316.94 79.4372   1
  -5   4   3 1347.81 77.8129   3
   4  -4  -3 62.0150 20.3048   1
   4  -4  -3 65.9233 16.6446   3
  -4  -4   3 108.745 23.0682   2
  -4   4   3 87.0772 16.2577   3
   3  -4  -3 895.808 54.4485   3
   3  -4  -3 895.120 56.9499   1
  -3  -4   3 883.903 60.5876   2
  -3  -4   3 842.044 51.7074   1
  -2  -4   3 208.801 17.0955   1
   2  -4  -3 216.848 20.9671   3
   2  -4  -3 190.750 22.2060   1
  -2  -4   3 205.157 28.2486   2
  -1  -4   3 -5.3882 9.12243   1
   1  -4  -3 8.44400 14.4695   1
   1  -4  -3 -14.224 11.8661   3
  -1  -4   3 41.0344 21.4431   2
   0  -4  -3 81.1720 17.3633   1
   0  -4   3 96.9080 22.7723   2
   0  -4   3 47.5313 10.3099   1
   0   4  -3 60.5402 10.7928   1
   1  -4   3 16.3327 21.3723   2
   1  -4   3 34.9346 10.1982   1
  -1  -4  -3 20.0834 15.1001   1
  -1   4  -3 19.3869 10.9023   1
   2  -4   3 7.60463 11.6555   1
   2  -4   3 -5.3773 20.7730   2
  -2  -4  -3 50.4075 16.9332   1
  -2   4  -3 31.2515 19.3661   3
  -2   4  -3 -10.346 12.4640   1
  -3  -4  -3 -34.600 19.0751   2
   3  -4   3 36.9724 14.3204   1
   3  -4   3 31.3347 20.7453   2
  -3  -4  -3 41.1482 18.9585   3
  -3  -4  -3 0.75189 16.7504   1
  -3   4  -3 41.4282 13.2608   1
  -3   4  -3 39.3879 20.1941   3
  -4  -4  -3 112.980 24.1016   3
  -4  -4  -3 75.9620 22.2070   2
   4  -4   3 116.249 18.6945   1
   4  -4   3 127.044 24.2811   2
  -4   4  -3 122.142 24.1509   3
   5  -4   3 51.3161 21.3541   2
  -5  -4  -3 41.1191 19.6037   2
  -5  -4  -3 45.0510 23.4398   3
   5  -4   3 50.9597 17.8945   1
  -5   4  -3 57.3893 23.7668   3
   6  -4   3 440.844 39.1179   2
   6  -4   3 451.150 36.2179   1
  -6  -4  -3 421.375 41.8894   3
  -6  -4  -3 452.297 38.3831   2
  -6   4  -3 404.253 41.6396   3
   7  -4   3 16.3079 19.2430   2
   7  -4   3 32.5764 21.3395   1
  -7  -4  -3 14.1712 17.0743   2
  -7  -4  -3 -24.872 25.8114   3
  -7   4  -3 -50.128 24.3393   3
  -8  -4  -3 49.0381 17.8061   2
   8  -4   3 1.13035 23.3513   1
   8  -4   3 72.9369 22.4951   2
  -8  -4  -3 112.767 32.6882   3
  -8   4  -3 29.7924 29.4195   3
   9  -4   3 95.0372 22.7890   2
   9  -4   3 80.1377 27.5863   1
  -9  -4  -3 91.2520 33.2553   3
  -9   4  -3 103.203 34.8232   3
  10  -4   3 127.504 29.9536   1
 -10  -4  -3 133.255 37.9785   3
 -10   4  -3 190.886 40.8275   3
 -11  -4  -3 53.5589 35.7255   3
 -11   4  -3 26.5961 35.8602   3
 -12  -4  -3 112.200 41.7655   3
 -12   4  -3 112.854 42.7656   3
 -13  -4  -3 42.0415 42.1200   3
 -13   4  -3 31.1709 41.4700   3
 -14   4  -3 -19.297 41.6502   3
 -13  -5   3 -23.805 41.6797   3
  13  -5  -3 25.4105 34.5188   1
  12  -5  -3 36.5908 32.0698   1
 -12  -5   3 64.8392 42.2951   3
 -11  -5   3 -0.1959 39.3918   3
  11  -5  -3 -33.088 28.9899   1
  11  -5  -3 38.8890 26.6335   2
 -11   5   3 52.8918 32.1781   3
  10  -5  -3 -2.8518 27.2032   1
 -10  -5   3 31.4495 26.2344   2
 -10  -5   3 31.8929 36.0233   3
 -10   5   3 -3.4991 28.1891   3
   9  -5  -3 61.3138 27.2573   1
  -9  -5   3 117.778 36.9575   3
  -9  -5   3 126.439 28.0626   2
  -9   5   3 116.585 28.6101   3
  -8  -5   3 133.008 26.7813   2
   8  -5  -3 96.7404 27.4526   1
  -8  -5   3 131.412 34.9981   3
  -8   5   3 164.657 27.6483   3
   7  -5  -3 -41.809 21.0171   1
  -7  -5   3 20.3788 24.6210   2
  -7  -5   3 31.3775 30.4525   3
  -7   5   3 12.2527 19.1589   3
  -6  -5   3 29.3791 23.6462   2
   6  -5  -3 -9.8162 21.5196   1
  -6   5   3 10.0270 17.9027   3
   5  -5  -3 17.7435 19.7344   1
  -5  -5   3 -8.6198 21.9835   2
  -5   5   3 14.2244 16.5648   3
   4  -5  -3 52.3020 20.4518   1
  -4  -5   3 69.5559 16.3683   1
  -4  -5   3 59.2702 24.3498   2
  -3  -5   3 119.135 16.4131   1
   3  -5  -3 104.115 22.1444   1
  -3  -5   3 142.245 28.8664   2
   2  -5  -3 190.379 24.8699   1
  -2  -5   3 234.875 33.7453   2
  -2  -5   3 215.802 19.0826   1
  -1  -5   3 134.465 28.3012   2
   1  -5  -3 128.165 20.0601   1
  -1  -5   3 85.1288 13.4277   1
   0  -5   3 108.088 28.4417   2
   0  -5   3 105.432 13.8257   1
   0  -5  -3 121.561 21.3482   1
  -1  -5  -3 5.33091 16.1480   1
   1  -5   3 41.4282 25.3530   2
  -1  -5  -3 -5.5618 25.1576   2
   1  -5   3 17.9889 11.5123   1
  -1   5  -3 19.0287 12.6302   1
   2  -5   3 719.098 44.8963   1
   2  -5   3 738.612 58.9012   2
  -2  -5  -3 733.303 50.8449   1
  -2   5  -3 730.423 46.2763   1
   3  -5   3 791.684 50.2758   1
   3  -5   3 866.812 62.2231   2
  -3  -5  -3 781.331 56.5529   1
  -3   5  -3 779.535 60.1240   3
  -4  -5  -3 175.643 29.8225   2
  -4  -5  -3 233.306 29.5815   1
   4  -5   3 292.095 25.4195   1
  -4  -5  -3 183.115 30.4302   3
   4  -5   3 321.243 35.4766   2
  -4   5  -3 249.577 31.3571   3
  -5  -5  -3 52.9473 22.8648   2
  -5  -5  -3 100.591 26.7431   3
   5  -5   3 104.180 27.1379   2
   5  -5   3 45.8559 19.1258   1
  -5  -5  -3 86.1915 22.6196   1
  -5   5  -3 76.3790 25.9219   3
   6  -5   3 5.09307 18.3005   1
  -6  -5  -3 13.8796 20.9039   2
   6  -5   3 -28.557 23.2794   2
  -6  -5  -3 30.4988 26.7821   3
  -6   5  -3 -2.7362 25.3298   3
  -7  -5  -3 49.2334 22.4717   2
   7  -5   3 39.2160 23.7070   2
   7  -5   3 17.4438 21.3370   1
  -7  -5  -3 13.3255 29.9183   3
  -7   5  -3 87.7736 30.0578   3
   8  -5   3 9.98050 22.2757   1
  -8  -5  -3 -18.148 30.1142   3
  -8  -5  -3 6.89121 20.1181   2
   8  -5   3 16.4621 23.3180   2
  -8   5  -3 3.76192 30.3351   3
   9  -5   3 40.0296 23.2363   2
   9  -5   3 -28.303 23.6135   1
  -9  -5  -3 -35.153 31.0097   3
  -9   5  -3 3.41962 32.5262   3
 -10  -5  -3 -12.076 34.4446   3
  10  -5   3 -18.567 25.5190   1
 -10   5  -3 -44.989 34.5009   3
  11  -5   3 46.9546 28.7514   1
 -11  -5  -3 75.3313 40.0482   3
 -11   5  -3 50.7154 41.5639   3
 -12  -5  -3 111.839 44.5266   3
 -12   5  -3 -32.189 40.2910   3
 -13   5  -3 24.3668 44.6325   3
  12  -6  -3 -2.6248 31.2653   1
 -12  -6   3 -44.928 43.4594   3
 -11  -6   3 45.9393 41.5687   3
  11  -6  -3 59.1767 33.5035   1
  11  -6  -3 21.7819 31.0539   2
  10  -6  -3 -4.3564 26.2827   1
 -10  -6   3 18.0596 39.2443   3
  10  -6  -3 -18.048 30.6258   2
  -9  -6   3 15.4342 24.4571   2
   9  -6  -3 1.34914 31.0371   2
  -9  -6   3 -16.932 36.7833   3
   9  -6  -3 -42.041 23.3946   1
  -9   6   3 5.46254 24.2142   3
   8  -6  -3 93.7688 32.0988   2
  -8  -6   3 67.0178 36.0609   3
  -8  -6   3 112.224 30.1012   2
   8  -6  -3 38.6895 26.5508   1
  -8   6   3 74.3624 24.7272   3
   7  -6  -3 405.241 38.2491   1
  -7  -6   3 377.405 41.6495   2
  -7  -6   3 243.061 42.6154   3
  -7   6   3 351.645 34.5232   3
  -6  -6   3 80.1471 28.1608   2
  -6  -6   3 49.9966 19.6407   1
   6  -6  -3 97.9132 25.3641   1
  -5  -6   3 0.31514 25.9102   2
   5  -6  -3 0.22926 20.4988   1
  -5  -6   3 11.5513 16.4059   1
  -4  -6   3 19.7106 25.5590   2
  -4  -6   3 -18.276 14.3121   1
   4  -6  -3 5.80317 20.9113   1
  -3  -6   3 -9.9307 26.4941   2
   3  -6  -3 31.3262 19.5573   1
  -3  -6   3 1.21825 13.4982   1
   2  -6  -3 112.215 21.2467   1
   2  -6  -3 61.9292 27.3034   2
  -2  -6   3 77.0806 15.1251   1
  -2  -6   3 41.8541 29.5524   2
  -1  -6   3 277.917 22.4032   1
   1  -6  -3 232.904 28.1381   1
  -1  -6   3 303.832 39.3311   2
   0  -6  -3 105.959 22.1337   1
   0  -6   3 58.1820 14.3112   1
   0  -6  -3 64.9408 28.1767   2
   0  -6   3 170.645 34.9538   2
   1  -6   3 -9.6362 12.6305   1
  -1  -6  -3 -10.910 19.2308   1
  -1  -6  -3 -34.225 24.8682   2
   1  -6   3 8.66172 29.0490   2
   2  -6   3 51.5700 14.0099   1
  -2  -6  -3 16.4142 27.6023   2
  -2  -6  -3 -26.809 18.1874   1
   2  -6   3 -7.2413 28.0329   2
  -3  -6  -3 -4.9175 19.9938   1
  -3  -6  -3 -24.712 26.6776   2
   3  -6   3 29.1502 28.2042   2
   3  -6   3 35.1030 15.7717   1
   4  -6   3 43.8361 29.4033   2
   4  -6   3 43.7442 17.0413   1
  -4  -6  -3 33.1700 23.3233   1
  -4  -6  -3 2.82109 26.4894   2
  -4  -6  -3 -26.144 22.7539   3
  -5  -6  -3 57.0490 28.3775   3
   5  -6   3 -38.481 27.6920   2
   5  -6   3 21.3622 18.1851   1
  -5  -6  -3 19.6971 24.1048   2
  -5  -6  -3 36.4258 22.9855   1
  -5   6  -3 2.58927 25.8406   3
  -6  -6  -3 73.9418 30.5517   3
  -6  -6  -3 46.6883 24.9139   1
  -6  -6  -3 72.1369 26.2711   2
   6  -6   3 37.0774 28.3862   2
   6  -6   3 81.9248 21.1154   1
  -6   6  -3 43.4011 29.5402   3
  -7  -6  -3 96.7991 27.4143   2
  -7  -6  -3 91.9686 31.4360   3
  -7  -6  -3 115.574 27.4828   1
   7  -6   3 149.900 25.2251   1
   7  -6   3 78.8661 30.6867   2
  -7   6  -3 154.773 34.7569   3
  -8  -6  -3 16.6443 23.7351   2
  -8  -6  -3 104.115 37.0041   3
   8  -6   3 76.0054 30.4598   2
   8  -6   3 76.4505 24.6871   1
  -8   6  -3 128.626 36.6652   3
   9  -6   3 -1.8599 26.2669   2
   9  -6   3 -16.901 23.7457   1
  -9  -6  -3 55.1665 35.1255   3
  -9   6  -3 -5.9579 33.4044   3
  10  -6   3 44.6759 28.1058   1
 -10  -6  -3 92.9309 39.6588   3
 -10   6  -3 98.5658 40.4107   3
 -11  -6  -3 26.3554 41.6208   3
  11  -6   3 28.2501 27.3720   1
 -11   6  -3 54.8982 43.3641   3
 -12  -6  -3 -98.080 52.7704   3
 -12   6  -3 21.2303 44.9346   3
  11  -7  -3 10.3833 33.6019   2
  11  -7  -3 5.57546 31.3959   1
  10  -7  -3 124.819 39.1796   2
 -10  -7   3 95.4732 42.5814   3
  10  -7  -3 141.529 33.6332   1
   9  -7  -3 57.5065 38.5463   2
  -9  -7   3 52.5205 29.1545   2
   9  -7  -3 -34.394 26.5334   1
  -9  -7   3 6.92619 35.9455   3
   8  -7  -3 35.7438 27.2369   1
  -8  -7   3 8.01412 34.2037   3
   8  -7  -3 24.2925 36.0517   2
  -8  -7   3 7.43540 28.4660   2
  -7  -7   3 -26.246 28.6324   2
   7  -7  -3 49.1936 33.9366   2
   7  -7  -3 28.0301 25.3838   1
  -7  -7   3 62.9634 35.4968   3
   6  -7  -3 -7.0122 35.4458   2
   6  -7  -3 -2.9639 23.7023   1
  -6  -7   3 -3.8694 28.8977   2
   5  -7  -3 56.4750 32.7895   2
  -5  -7   3 5.20755 28.4826   2
   5  -7  -3 -25.188 22.6882   1
   4  -7  -3 -53.782 21.6589   1
   4  -7  -3 21.4751 34.7458   2
  -4  -7   3 15.5168 28.2117   2
   3  -7  -3 24.5863 22.3890   1
   3  -7  -3 28.0838 33.3906   2
  -3  -7   3 63.9929 29.8281   2
  -2  -7   3 53.9982 33.0539   2
   2  -7  -3 18.3453 30.0133   2
   2  -7  -3 110.885 23.4491   1
  -1  -7   3 65.9293 33.3288   2
   1  -7  -3 96.0604 35.1722   2
   1  -7  -3 85.8165 22.3457   1
   0  -7  -3 26.3475 28.3464   2
   0  -7  -3 41.3248 21.6562   1
   0  -7   3 6.99461 33.0252   2
  -1  -7  -3 25.7113 22.3433   1
   1  -7   3 18.2042 21.7386   1
  -1  -7  -3 -61.807 29.0436   2
   1  -7   3 -26.166 32.3519   2
  -2  -7  -3 235.438 32.8026   1
  -2  -7  -3 215.691 39.5977   2
   2  -7   3 329.321 26.1655   1
   2  -7   3 299.632 46.6226   2
  -3  -7  -3 68.7852 29.8192   2
   3  -7   3 -37.335 30.9864   2
   3  -7   3 39.1566 17.1425   1
  -3  -7  -3 3.15141 21.2929   1
  -4  -7  -3 129.369 31.7458   3
   4  -7   3 255.409 41.8463   2
  -4  -7  -3 148.936 35.6433   2
   4  -7   3 255.116 25.5264   1
  -4  -7  -3 204.389 30.5690   1
   5  -7   3 194.383 25.2759   1
  -5  -7  -3 193.196 31.6914   1
  -5  -7  -3 95.1413 31.5252   3
   5  -7   3 171.968 38.8379   2
  -5  -7  -3 180.294 35.6440   2
  -6  -7  -3 105.180 27.8650   1
  -6  -7  -3 27.8273 29.2815   3
   6  -7   3 0.93735 20.1874   1
  -6  -7  -3 92.5402 30.0899   2
   6  -7   3 62.8666 32.1779   2
  -6   7  -3 105.285 33.6888   3
   7  -7   3 -32.559 31.0332   2
  -7  -7  -3 52.4124 27.0633   1
  -7  -7  -3 27.0591 31.8051   3
   7  -7   3 -0.8652 21.5858   1
  -7  -7  -3 12.7716 26.6340   2
  -7   7  -3 7.39881 32.3463   3
  -8  -7  -3 18.2398 26.1117   1
  -8  -7  -3 11.4816 32.5195   3
   8  -7   3 -23.501 28.8615   2
   8  -7   3 8.96301 23.9572   1
  -8   7  -3 4.59929 33.0346   3
  -9  -7  -3 5.51511 34.9344   3
   9  -7   3 8.99811 32.3136   2
  -9  -7  -3 51.7272 28.2324   1
   9  -7   3 -42.168 23.8971   1
  -9   7  -3 -14.884 37.3605   3
 -10  -7  -3 -5.4470 37.6684   3
  10  -7   3 56.0538 46.9916   1
 -10  -7  -3 3.68576 24.8698   1
 -10   7  -3 -10.416 40.1053   3
  -9  -8   3 54.1615 37.8948   3
   9  -8  -3 74.1877 38.9829   2
   9  -8  -3 105.650 32.4849   1
  -9  -8   3 115.495 46.5490   2
   8  -8  -3 95.2411 29.8536   1
  -8  -8   3 7.17753 38.0710   3
  -8  -8   3 64.3086 34.1078   2
   8  -8  -3 89.2661 43.6846   2
  -7  -8   3 5.47183 31.0706   2
   7  -8  -3 -11.179 25.5127   1
   7  -8  -3 11.5569 40.6047   2
  -7  -8   3 71.8625 36.1080   3
  -6  -8   3 25.9343 34.0736   2
   6  -8  -3 9.71416 25.8652   1
   6  -8  -3 51.1010 39.8706   2
  -5  -8   3 74.2882 35.3597   2
   5  -8  -3 40.3183 40.8114   2
   5  -8  -3 -19.763 25.6473   1
   4  -8  -3 71.4479 40.3831   2
  -4  -8   3 109.655 39.4954   2
   4  -8  -3 61.7539 27.4549   1
  -3  -8   3 120.154 36.2270   2
   3  -8  -3 163.407 29.8449   1
   3  -8  -3 87.2257 40.1116   2
  -2  -8   3 38.7751 32.0749   2
   2  -8  -3 97.1164 25.8354   1
   2  -8  -3 65.4580 34.5226   2
   1  -8  -3 59.6014 23.4022   1
  -1  -8   3 4.61330 33.8564   2
   1  -8  -3 40.4659 32.6959   2
   0  -8  -3 20.2323 34.6235   2
   0  -8  -3 -34.740 20.6139   1
   0  -8   3 3.59007 33.8035   2
   1  -8   3 17.4417 36.4386   2
  -1  -8  -3 4.00555 32.0095   2
  -1  -8  -3 -25.290 22.8936   1
  -2  -8  -3 38.9121 34.0035   2
  -2  -8  -3 -39.093 22.7220   1
   2  -8   3 2.52170 33.8373   2
  -3  -8  -3 -11.334 32.5382   2
  -3  -8  -3 -28.626 24.3965   1
   3  -8   3 -4.7501 34.7289   2
  -4  -8  -3 -19.144 31.9155   2
  -4  -8  -3 -0.0771 26.7354   3
   4  -8   3 -0.3220 36.8852   2
  -4  -8  -3 15.2866 24.0870   1
  -5  -8  -3 13.7198 29.9082   3
  -5  -8  -3 55.8047 34.5456   2
   5  -8   3 134.301 42.1092   2
  -5  -8  -3 72.2445 27.8756   1
  -6  -8  -3 124.790 35.6429   2
  -6  -8  -3 82.1939 28.7456   1
   6  -8   3 79.9747 38.7573   2
  -6  -8  -3 104.376 34.8855   3
  -7  -8  -3 37.5568 34.4934   3
  -7  -8  -3 9.69726 28.8260   2
   7  -8   3 72.6583 37.8651   2
  -7  -8  -3 71.7012 29.8836   1
  -8  -8  -3 29.7725 37.7836   3
   8  -8   3 -14.468 36.9986   2
  -8  -8  -3 49.9803 44.6151   1
   6  -9  -3 -40.530 42.5569   2
  -6  -9   3 -32.938 33.3642   2
   5  -9  -3 -46.817 35.8936   2
  -5  -9   3 -6.1245 34.7120   2
   4  -9  -3 31.6562 42.7676   2
  -4  -9   3 23.9339 35.0367   2
  -3  -9   3 73.1462 38.1673   2
   3  -9  -3 27.1208 43.0903   2
  -2  -9   3 37.5656 38.8810   2
   2  -9  -3 16.7733 39.7528   2
   1  -9  -3 19.1077 38.2956   2
  -1  -9   3 72.4046 41.8655   2
   0  -9   3 195.705 47.0816   2
   0  -9  -3 185.917 43.7052   2
  -1  -9  -3 36.0844 36.9063   2
   1  -9   3 87.7404 41.6826   2
  -2  -9  -3 -28.646 36.3214   2
   2  -9   3 15.4800 41.8001   2
  -3  -9  -3 13.1043 32.4138   3
  -3  -9  -3 24.1283 37.5493   2
   3  -9   3 7.40809 42.1032   2
   4  -9   3 -36.199 38.6264   2
  -4  -9  -3 -32.105 30.5927   3
  -4  -9  -3 -8.5540 34.7419   2
   5  -9   3 -53.205 37.7152   2
  -5  -9  -3 29.1343 36.3977   2
  -5  -9  -3 -20.962 31.3187   3
  -6  -9  -3 0.24575 33.0935   3
  -6  -9  -3 21.5781 34.1235   2
   6  -9   3 17.3258 38.8034   2
 -16   0   4 1.57882 35.8269   3
 -15   0   4 39.0471 35.1770   3
 -14   0   4 75.5306 33.8438   3
 -13   0   4 46.8359 28.3191   3
  13   0  -4 -31.714 26.3420   1
 -12   0   4 88.2063 30.2009   3
  12   0  -4 97.5592 30.0660   1
  11   0  -4 232.011 33.8835   1
 -11   0   4 194.671 32.8363   3
 -10   0   4 -37.669 20.6184   3
  10   0  -4 12.9676 21.0161   1
  -9   0   4 23.1356 19.8293   3
   9   0  -4 16.8576 20.2709   1
   8   0  -4 1213.19 78.4834   1
   8   0  -4 1408.37 82.4696   2
  -8   0   4 1295.57 76.1196   2
  -8   0   4 1301.89 79.7368   3
   7   0  -4 4823.41 261.124   1
   7   0  -4 4885.57 264.747   2
  -7   0   4 4971.03 260.353   2
  -7   0   4 4977.17 261.559   3
   6   0  -4 4238.73 249.034   2
  -6   0   4 4817.64 244.733   2
   6   0  -4 4683.04 244.631   1
  -6   0   4 4664.88 244.754   3
   5   0  -4 748.428 61.1075   2
  -5   0   4 722.730 49.2777   3
   5   0  -4 843.220 50.2668   1
  -5   0   4 819.685 52.5750   2
   4   0  -4 20.3922 27.3203   2
   4   0  -4 33.4985 15.3807   1
  -4   0   4 22.9467 21.7949   2
  -4   0   4 36.6825 14.3196   3
  -4   0   4 12.8279 15.2233   1
   3   0  -4 338.779 39.2696   2
  -3   0   4 372.975 35.6243   2
   3   0  -4 316.381 28.1336   1
  -3   0   4 352.711 26.0597   1
  -2   0   4 75.0553 30.2478   2
  -2   0   4 141.638 14.7509   1
   2   0  -4 66.1361 31.9361   2
   2   0  -4 136.776 15.9075   1
   1   0  -4 264.588 22.5801   1
  -1   0   4 179.234 32.2493   2
  -1   0   4 285.737 20.4863   1
   1   0  -4 245.162 32.8186   2
  -1   0   4 250.863 20.4140   3
   0   0   4 -9.1289 24.5252   2
   0   0  -4 -3.3888 9.98796   1
   0   0   4 -8.2209 11.0610   3
   0   0  -4 -22.471 11.2700   3
   0   0  -4 -30.333 22.0020   2
   1   0   4 23.6412 13.5127   3
   1   0   4 -38.566 24.9488   2
  -1   0  -4 15.0251 13.1869   3
  -1   0  -4 -2.4726 20.5110   2
  -2   0  -4 56.8035 16.0340   3
  -2   0  -4 82.1341 16.8337   2
   2   0   4 86.4234 16.5249   3
   2   0   4 44.1573 23.8002   2
  -3   0  -4 190.349 21.4842   3
   3   0   4 205.310 23.4468   2
  -3   0  -4 226.540 17.6533   2
   3   0   4 254.261 23.6185   3
  -4   0  -4 389.474 32.9361   3
   4   0   4 331.609 27.2491   2
  -4   0  -4 374.733 23.0380   2
  -5   0  -4 466.937 39.4044   3
  -6   0  -4 617.121 47.2887   3
  -7   0  -4 1640.17 97.6329   3
  -8   0  -4 3158.93 175.889   3
  -9   0  -4 901.166 67.0760   3
 -10   0  -4 38.6595 25.5861   3
 -11   0  -4 136.218 32.5203   3
 -12   0  -4 64.6442 31.7278   3
 -13   0  -4 36.2653 34.5275   3
 -14   0  -4 -5.9999 34.7274   3
 -15  -1   4 14.0943 34.3875   3
 -15   1   4 -63.345 31.3984   3
  14  -1  -4 35.0425 30.0749   1
 -14  -1   4 50.8742 33.9188   3
 -14   1   4 4.56317 31.0764   3
  13  -1  -4 76.7500 29.6592   1
 -13  -1   4 78.8013 32.2970   3
 -13   1   4 105.847 32.9424   3
  12  -1  -4 283.886 40.3707   1
 -12  -1   4 370.203 43.2361   3
 -12   1   4 389.255 43.4672   3
 -11  -1   4 60.8895 27.1265   3
  11  -1  -4 104.083 29.0212   1
 -11   1   4 73.6677 26.9714   3
 -10  -1   4 15.4756 22.3231   3
  10  -1  -4 -12.883 21.0180   1
 -10  -1   4 12.2336 17.5809   2
 -10   1   4 16.6074 22.4404   3
  10   1  -4 12.7651 20.0953   1
   9  -1  -4 16.1832 21.0934   1
  -9  -1   4 56.9018 23.0625   3
  -9  -1   4 24.8893 18.7079   2
   9   1  -4 35.0980 21.7799   1
  -9   1   4 38.3000 20.6478   3
  -8  -1   4 98.2491 22.5306   3
   8  -1  -4 66.2179 22.2724   1
  -8  -1   4 87.2187 21.8866   2
   8   1  -4 76.3819 21.0200   1
   8   1  -4 84.1329 18.1308   2
  -8   1   4 87.7749 20.7866   3
  -7  -1   4 60.5853 24.5586   2
   7  -1  -4 73.5096 18.0917   1
  -7  -1   4 49.3833 19.6451   3
   7   1  -4 45.8137 18.3095   1
   7   1  -4 43.8164 16.9990   2
  -7   1   4 86.9732 18.5697   3
   6  -1  -4 -1.8590 14.6882   3
   6  -1  -4 -0.7119 18.5355   2
  -6  -1   4 -19.402 25.8637   2
   6  -1  -4 1.77226 17.1704   1
  -6  -1   4 15.2650 17.5517   3
  -6   1   4 10.0452 14.5134   3
   6   1  -4 -19.344 14.8610   1
   6   1  -4 20.8349 16.2161   2
   5  -1  -4 52.7184 17.6502   1
  -5  -1   4 49.9555 27.2961   2
  -5  -1   4 55.8134 15.8379   1
  -5  -1   4 53.3109 18.4748   3
   5  -1  -4 -0.1195 18.0716   2
   5  -1  -4 34.9255 14.6501   3
  -5   1   4 31.7617 13.9375   3
   5   1  -4 75.3862 15.6056   1
   5   1  -4 36.2967 18.1176   2
   4  -1  -4 19.9150 16.3664   1
  -4  -1   4 7.33157 13.5009   1
   4  -1  -4 3.42660 12.0679   3
  -4  -1   4 29.5487 24.3234   2
   4  -1  -4 9.67308 16.7325   2
   4   1  -4 15.9571 13.0009   1
  -4   1   4 11.7163 16.3699   1
  -4   1   4 8.59681 11.3450   3
   4   1  -4 25.4840 18.3112   2
   3  -1  -4 -14.885 15.3720   1
   3  -1  -4 -24.625 14.4574   2
  -3  -1   4 -4.6006 11.3858   1
  -3  -1   4 -10.854 21.6906   2
   3  -1  -4 -19.945 10.4096   3
  -3   1   4 -4.3677 13.7303   1
   3   1  -4 -9.1425 17.6843   2
  -3   1   4 -16.170 9.11096   3
   3   1  -4 5.02053 11.2389   1
  -2  -1   4 296.684 28.6572   2
  -2  -1   4 282.884 21.4646   1
   2  -1  -4 292.765 27.2039   2
   2  -1  -4 286.599 23.9416   1
   2   1  -4 276.286 27.4099   2
  -2   1   4 345.696 24.3717   1
   2   1  -4 269.487 21.8062   1
  -1  -1   4 1315.43 74.5804   2
  -1  -1   4 1279.05 72.0340   3
   1  -1  -4 1267.59 73.8174   2
   1  -1  -4 1281.44 71.6749   1
  -1  -1   4 1244.21 68.1169   1
  -1   1   4 1353.61 71.9876   1
   1   1  -4 1364.63 74.0272   2
   1   1  -4 1237.60 68.3645   1
   0  -1  -4 403.748 31.1930   1
   0  -1   4 380.088 31.5246   2
   0  -1  -4 379.380 31.2699   2
   0  -1  -4 351.669 25.0934   3
   0  -1   4 420.823 33.0046   3
   0   1   4 405.514 25.3153   3
   0   1   4 397.252 28.5030   1
   0   1  -4 403.010 33.3714   3
   0   1  -4 384.469 33.7275   2
  -1  -1  -4 272.435 22.0403   2
   1  -1   4 256.098 24.5093   3
   1  -1   4 244.314 22.2654   2
  -1  -1  -4 236.016 19.5633   3
   1   1   4 275.226 23.6170   3
  -1   1  -4 237.136 24.6526   3
  -1   1  -4 275.864 23.5987   2
   2  -1   4 356.049 28.4503   3
  -2  -1  -4 378.513 29.6442   3
  -2  -1  -4 361.249 26.2251   2
   2  -1   4 334.950 28.2084   2
  -2   1  -4 356.935 28.8732   3
   2   1   4 342.757 30.4418   3
  -2   1  -4 319.579 27.7497   2
  -3  -1  -4 165.071 20.1928   3
   3  -1   4 151.235 21.9227   3
  -3  -1  -4 203.910 16.9729   2
   3  -1   4 204.026 18.3139   2
  -3   1  -4 146.812 18.3384   1
  -3   1  -4 211.088 18.2056   2
   3   1   4 208.691 21.6292   3
  -3   1  -4 155.936 22.2931   3
  -4  -1  -4 19.8934 10.6028   2
   4  -1   4 1.74915 11.3227   2
  -4  -1  -4 17.1320 15.3146   3
  -4   1  -4 -2.8345 16.9141   3
  -4   1  -4 18.5557 11.4445   2
   5  -1   4 206.725 17.2949   2
  -5  -1  -4 151.413 22.5801   3
  -5   1  -4 173.223 24.4288   3
  -6  -1  -4 4.32349 17.9698   3
   6  -1   4 37.1776 10.4790   2
  -6   1  -4 29.6495 18.8192   3
  -7  -1  -4 5.59115 18.9958   3
   7  -1   4 8.20939 8.95756   2
  -7   1  -4 16.2834 20.0354   3
  -8  -1  -4 4.04410 20.7688   3
  -8   1  -4 61.3659 24.0453   3
  -9  -1  -4 112.636 27.3032   3
  -9   1  -4 87.3212 27.0958   3
 -10  -1  -4 -2.8749 25.4983   3
 -10   1  -4 15.0221 25.8160   3
 -11  -1  -4 9.23003 28.2661   3
 -11   1  -4 14.7471 28.3533   3
 -12  -1  -4 79.5682 34.6933   3
 -12   1  -4 56.8837 33.6993   3
 -13  -1  -4 204.068 43.3415   3
 -13   1  -4 300.170 44.7133   3
 -14  -1  -4 76.8687 37.9223   3
 -14   1  -4 62.7662 38.7173   3
 -15   1  -4 -3.7693 54.8091   3
  15  -2  -4 -23.753 28.0746   1
 -15  -2   4 31.2597 36.8254   3
 -15   2   4 44.5644 36.4121   3
 -14  -2   4 -24.697 32.9168   3
  14  -2  -4 -15.373 31.9032   1
 -14   2   4 -27.620 32.2586   3
 -13  -2   4 -12.420 29.7910   3
  13  -2  -4 56.4224 27.9488   1
 -13   2   4 -10.143 30.5103   3
  12  -2  -4 33.2096 25.3947   1
 -12  -2   4 25.1822 29.4818   3
 -12   2   4 -33.319 27.3960   3
 -11  -2   4 -23.240 25.4268   3
 -11  -2   4 11.9482 21.6294   2
  11  -2  -4 -41.807 24.1809   1
 -11   2   4 -33.099 25.3544   3
 -10  -2   4 12.6850 22.6341   2
  10  -2  -4 -25.239 23.8029   1
 -10  -2   4 -28.446 23.6428   3
 -10   2   4 -11.716 23.4410   3
  -9  -2   4 50.2310 25.4242   3
  -9  -2   4 87.5782 29.2860   2
   9  -2  -4 54.9465 21.6515   1
  -9   2   4 73.2331 23.7739   3
   8  -2  -4 347.452 35.3715   1
  -8  -2   4 364.429 40.8936   2
  -8  -2   4 348.862 36.6504   3
  -8   2   4 382.804 34.5355   3
  -7  -2   4 27.4368 25.2955   2
   7  -2  -4 42.1518 18.2010   1
  -7  -2   4 49.3999 20.8792   3
  -7   2   4 55.5824 19.4165   3
   6  -2  -4 318.621 31.0578   1
  -6  -2   4 332.844 33.7226   2
   6  -2  -4 311.930 27.2590   3
  -6  -2   4 411.554 35.3404   3
  -6   2   4 364.683 30.1021   3
   5  -2  -4 1676.84 90.4191   3
  -5  -2   4 1609.59 90.6069   1
  -5  -2   4 1525.38 93.6546   2
   5  -2  -4 1522.14 93.0881   1
  -5   2   4 1668.26 91.6423   3
   5   2  -4 1848.53 96.9180   2
  -4  -2   4 410.291 30.1583   1
   4  -2  -4 475.048 30.2248   3
   4  -2  -4 434.513 37.0172   1
  -4  -2   4 417.111 37.6596   2
  -4   2   4 463.383 32.3077   3
   4   2  -4 430.628 37.0966   2
  -3  -2   4 57.8024 18.2574   2
   3  -2  -4 57.2657 17.5902   1
  -3  -2   4 37.3839 10.4603   1
   3  -2  -4 56.5135 9.96629   3
  -3   2   4 53.8752 10.5894   3
   3   2  -4 76.4064 18.5687   2
  -2  -2   4 167.482 15.3647   1
  -2  -2   4 215.565 25.1012   2
   2  -2  -4 299.246 24.5972   1
  -2   2   4 221.226 21.4935   1
   2   2  -4 226.007 23.7637   2
  -1  -2   4 411.067 32.7753   3
  -1  -2   4 388.375 36.0267   2
   1  -2  -4 393.799 33.0587   1
   1   2  -4 428.516 33.1996   2
  -1   2   4 420.705 32.0676   1
   0  -2  -4 42.5716 14.7969   1
   0  -2   4 57.4254 16.2204   3
   0  -2   4 46.3726 17.2573   2
   0  -2  -4 81.6278 11.8960   3
   0   2   4 57.4271 14.2483   1
   0   2  -4 63.2450 16.9817   3
   0   2  -4 69.6933 18.1197   2
  -1  -2  -4 -1.4783 12.3366   3
   1  -2   4 -14.570 15.7468   3
   1  -2   4 13.4992 16.3288   2
  -1  -2  -4 -5.2208 14.5722   1
  -1   2  -4 1.56911 8.58129   1
  -1   2  -4 12.5507 16.3073   3
  -1   2  -4 16.6909 16.9024   2
   2  -2   4 284.355 27.3062   2
  -2  -2  -4 341.878 26.1455   3
  -2   2  -4 293.529 28.6693   3
  -2   2  -4 328.117 24.7274   1
  -2   2  -4 391.373 31.4935   2
   3  -2   4 40.7623 15.3574   2
  -3  -2  -4 30.7400 15.3624   3
  -3   2  -4 -6.4726 17.6303   3
  -3   2  -4 27.2892 15.9239   2
  -3   2  -4 36.4156 13.6592   1
   3   2   4 20.3750 15.6400   3
   4  -2   4 -14.782 14.1582   2
  -4  -2  -4 23.6808 17.0023   3
  -4   2  -4 27.1582 14.3453   2
  -4   2  -4 -3.4961 17.3156   3
  -5  -2  -4 275.627 29.1260   3
  -5  -2  -4 297.837 24.5840   2
   5  -2   4 307.641 25.6205   2
  -5   2  -4 266.515 29.5527   3
   6  -2   4 1371.79 78.8269   2
  -6  -2  -4 1359.26 75.1225   2
  -6  -2  -4 1373.14 84.6926   3
  -6   2  -4 1471.89 86.5785   3
   7  -2   4 701.282 44.8246   2
  -7  -2  -4 651.010 54.3304   3
  -7   2  -4 678.594 56.3549   3
   8  -2   4 15.3746 13.3870   2
  -8  -2  -4 5.00092 23.3025   3
  -8   2  -4 35.1504 24.7951   3
  -9  -2  -4 -8.6835 25.2377   3
   9  -2   4 4.59532 12.9811   2
  -9   2  -4 9.39196 25.9266   3
 -10  -2  -4 129.206 33.0837   3
 -10   2  -4 109.357 31.3442   3
 -11  -2  -4 51.7455 31.7906   3
 -11   2  -4 -4.7826 29.4271   3
 -12  -2  -4 8.45364 32.3513   3
 -12   2  -4 -0.6765 32.2553   3
 -13  -2  -4 -56.714 33.8027   3
 -13   2  -4 22.5450 34.8767   3
 -14  -2  -4 -16.721 37.2843   3
 -14   2  -4 51.9197 38.4269   3
 -15  -3   4 162.138 45.8853   3
 -15   3   4 154.999 46.6435   3
  14  -3  -4 372.407 50.1990   1
 -14  -3   4 516.313 57.3403   3
 -14   3   4 496.375 57.2794   3
  13  -3  -4 220.456 38.7586   1
 -13  -3   4 269.281 45.0329   3
 -13   3   4 250.567 43.8643   3
  12  -3  -4 44.9911 27.5105   1
 -12  -3   4 42.4360 33.4253   3
 -12   3   4 82.9901 33.2394   3
  11  -3  -4 87.4193 29.4614   1
 -11  -3   4 148.956 34.8773   3
 -11   3   4 133.200 33.2493   3
 -10  -3   4 81.8227 33.3272   2
  10  -3  -4 55.1549 24.7738   1
 -10  -3   4 45.5002 30.0691   3
 -10   3   4 36.1307 27.5726   3
  -9  -3   4 11.4103 25.6198   3
  -9  -3   4 -11.293 26.6920   2
   9  -3  -4 -37.697 19.5871   1
  -9   3   4 -40.530 22.3357   3
   8  -3  -4 188.033 28.6738   1
  -8  -3   4 250.873 33.6410   3
  -8  -3   4 251.215 32.6014   2
  -8   3   4 228.416 30.0949   3
  -7  -3   4 63.9059 21.4455   2
   7  -3  -4 49.6297 20.7490   1
  -7  -3   4 45.7582 23.9741   3
  -7   3   4 49.5655 20.5588   3
   6  -3  -4 36.0455 15.8951   3
  -6  -3   4 34.0316 19.0014   2
   6  -3  -4 18.7992 19.7488   1
  -6   3   4 42.7836 17.7641   3
   5  -3  -4 134.082 16.6143   3
   5  -3  -4 98.5580 21.1438   1
  -5  -3   4 126.165 22.4589   2
  -5   3   4 129.950 17.9525   3
  -4  -3   4 157.172 22.9652   2
  -4  -3   4 157.585 15.2951   1
   4  -3  -4 175.202 16.6969   3
   4  -3  -4 148.159 22.2111   1
  -4   3   4 144.334 17.1288   3
  -3  -3   4 18.0203 18.5318   2
   3  -3  -4 11.5614 10.6707   3
  -3  -3   4 29.8941 9.00856   1
   3  -3  -4 2.18330 16.3814   1
  -3   3   4 21.6646 10.3033   3
  -2  -3   4 291.780 29.6976   2
  -2  -3   4 314.580 19.3480   1
   2  -3  -4 293.569 26.7100   1
   2  -3  -4 273.695 21.6034   3
  -2  -3   4 317.178 20.3921   1
  -1  -3   4 899.652 62.6780   2
   1  -3  -4 967.205 54.8789   3
   1  -3  -4 1058.32 60.0798   1
   0  -3   4 5577.15 286.414   1
   0  -3  -4 5506.07 291.633   1
   0  -3   4 5470.18 293.608   2
   0   3  -4 5554.51 286.770   1
  -1  -3  -4 8291.92 419.528   3
   1  -3   4 7882.43 422.427   2
  -1  -3  -4 7993.45 421.231   1
   1  -3   4 7942.15 416.656   1
  -1   3  -4 7927.21 422.177   3
  -1   3  -4 8158.46 416.861   1
   2  -3   4 857.052 50.0492   1
  -2  -3  -4 826.212 54.3428   3
   2  -3   4 871.659 58.5935   2
  -2  -3  -4 883.586 56.7029   1
  -2   3  -4 877.093 58.5836   3
  -2   3  -4 913.199 50.1428   1
   3  -3   4 59.0900 14.1277   1
  -3  -3  -4 68.2134 17.2271   3
   3  -3   4 66.4323 19.8127   2
  -3   3  -4 48.4098 13.3268   1
  -3   3  -4 72.8409 21.0218   3
   4  -3   4 27.2465 18.1578   2
   4  -3   4 58.3074 15.4959   1
  -4  -3  -4 22.7705 18.4226   3
  -4   3  -4 -12.975 19.2857   3
   5  -3   4 142.336 21.8960   2
  -5  -3  -4 129.306 19.2562   2
   5  -3   4 156.607 20.9301   1
  -5  -3  -4 109.425 23.8030   3
  -5   3  -4 145.993 25.7450   3
  -6  -3  -4 92.3004 24.2685   3
   6  -3   4 45.5890 19.4315   1
  -6  -3  -4 73.8572 15.7970   2
   6  -3   4 65.8759 18.7343   2
  -6   3  -4 48.6929 25.0009   3
   7  -3   4 -10.105 16.1744   2
  -7  -3  -4 2.99494 12.7317   2
  -7  -3  -4 -15.560 22.7748   3
   7  -3   4 -16.729 18.5961   1
  -7   3  -4 18.6466 24.8473   3
  -8  -3  -4 55.5148 13.9887   2
   8  -3   4 27.8791 17.4572   2
  -8  -3  -4 81.6799 28.1380   3
  -8   3  -4 56.1575 27.6736   3
   9  -3   4 44.8407 17.5434   2
  -9  -3  -4 20.8352 28.5014   3
  -9   3  -4 79.1661 29.9204   3
 -10  -3  -4 -8.6011 30.0370   3
 -10   3  -4 -18.164 28.8801   3
 -11  -3  -4 64.0180 35.1152   3
 -11   3  -4 43.8570 33.3543   3
 -12  -3  -4 207.443 44.5944   3
 -12   3  -4 211.005 42.4110   3
 -13  -3  -4 53.8092 39.6714   3
 -13   3  -4 131.433 41.3720   3
 -14  -3  -4 -9.7253 44.8389   3
 -14   3  -4 -13.845 36.6638   3
  14  -4  -4 4.76957 32.8555   1
 -14  -4   4 61.1637 39.5260   3
 -13  -4   4 24.7540 36.6672   3
  13  -4  -4 21.1802 29.5842   1
 -13   4   4 27.2509 36.5588   3
 -12  -4   4 16.7017 34.5662   3
  12  -4  -4 0.12057 31.1347   1
 -12   4   4 -38.735 31.6595   3
  11  -4  -4 15.5585 29.6407   1
 -11  -4   4 14.7952 34.5694   3
 -11   4   4 54.3606 32.0466   3
 -10  -4   4 -39.531 26.8218   2
  10  -4  -4 10.1444 25.3822   1
 -10  -4   4 26.9236 30.4861   3
 -10   4   4 10.5118 28.0127   3
   9  -4  -4 -12.527 23.8811   1
  -9  -4   4 18.1483 29.3073   3
  -9  -4   4 8.44111 24.0711   2
  -9   4   4 3.80454 25.0378   3
   8  -4  -4 28.3492 22.8966   1
  -8  -4   4 36.0364 27.7445   3
  -8  -4   4 29.1863 22.2768   2
  -8   4   4 38.7903 22.4919   3
  -7  -4   4 89.6291 29.2633   3
  -7  -4   4 103.176 23.6202   2
   7  -4  -4 102.628 24.1125   1
  -7   4   4 59.6537 20.4415   3
  -6  -4   4 195.568 27.3036   2
   6  -4  -4 114.281 26.0233   1
  -6   4   4 164.467 21.7127   3
   5  -4  -4 290.196 30.3310   1
   5  -4  -4 272.500 24.6848   3
  -5  -4   4 295.523 23.4628   1
  -5  -4   4 319.858 33.4483   2
  -5   4   4 252.959 24.3727   3
  -4  -4   4 37.3034 21.5738   2
   4  -4  -4 33.5235 13.4969   3
   4  -4  -4 14.4658 18.5047   1
  -4  -4   4 34.3485 11.2903   1
  -4   4   4 28.6264 13.0748   3
   3  -4  -4 10.1509 17.5687   1
  -3  -4   4 6.56693 9.06077   1
  -3  -4   4 5.09333 10.3786   1
   3  -4  -4 14.6031 12.7308   3
  -3  -4   4 24.5035 20.2754   2
   2  -4  -4 11.7753 17.2934   1
  -2  -4   4 -0.3367 21.1017   2
   2  -4  -4 -6.3738 12.2677   3
  -2  -4   4 16.0692 8.22924   1
  -1  -4   4 64.7841 8.46323   1
  -1  -4   4 45.9276 23.1320   2
   1  -4  -4 40.7863 16.7497   1
   1  -4  -4 29.1534 12.7526   3
   0  -4   4 29.3420 21.9425   2
   0  -4   4 16.4930 7.22137   1
   0  -4  -4 0.20878 14.1143   1
   0   4  -4 -3.0715 7.75588   1
   1  -4   4 -2.4225 20.8147   2
  -1  -4  -4 17.3351 15.3092   1
   1  -4   4 17.2147 9.27177   1
  -1   4  -4 0.26274 9.59890   1
   2  -4   4 154.253 26.7962   2
  -2  -4  -4 169.800 22.6154   3
  -2  -4  -4 127.243 22.2138   1
   2  -4   4 220.872 17.6731   1
  -2   4  -4 178.467 26.3029   3
  -2   4  -4 196.866 18.2640   1
   3  -4   4 -26.638 12.6813   1
  -3  -4  -4 28.9861 18.8890   1
  -3  -4  -4 -14.199 17.2680   3
   3  -4   4 -10.544 20.6609   2
  -3   4  -4 -3.1730 10.9599   1
  -3   4  -4 -15.548 18.9376   3
   4  -4   4 85.7559 23.4499   2
  -4  -4  -4 -18.823 18.8982   2
   4  -4   4 49.4090 14.9878   1
  -4  -4  -4 35.3255 20.5164   3
  -4   4  -4 18.2615 21.3633   3
  -5  -4  -4 138.747 27.8111   3
   5  -4   4 150.987 21.4155   1
   5  -4   4 127.685 25.5086   2
  -5  -4  -4 163.996 24.5676   2
  -5   4  -4 202.395 30.4491   3
   6  -4   4 257.282 30.4883   2
   6  -4   4 260.448 27.6094   1
  -6  -4  -4 300.142 28.9953   2
  -6  -4  -4 206.615 33.4762   3
  -6   4  -4 271.883 35.6695   3
  -7  -4  -4 170.698 22.6873   2
   7  -4   4 167.363 26.3847   1
   7  -4   4 126.887 25.4338   2
  -7  -4  -4 146.176 32.2931   3
  -7   4  -4 235.309 35.3838   3
   8  -4   4 26.9157 20.7776   2
   8  -4   4 12.2038 21.1652   1
  -8  -4  -4 19.8574 28.6498   3
  -8  -4  -4 38.0778 17.2972   2
  -8   4  -4 36.3179 29.9212   3
  -9  -4  -4 -14.282 30.3607   3
   9  -4   4 -5.4514 18.8991   2
   9  -4   4 -17.731 21.7280   1
  -9   4  -4 29.3270 31.6917   3
 -10  -4  -4 -53.668 31.0593   3
 -10   4  -4 8.70983 33.6542   3
 -11  -4  -4 27.7794 36.2779   3
 -11   4  -4 2.15596 36.1503   3
 -12  -4  -4 2.14558 39.1664   3
 -12   4  -4 -36.376 36.3962   3
 -13  -4  -4 -85.000 38.4687   3
 -13   4  -4 -22.887 38.8807   3
  13  -5  -4 84.0876 36.7178   1
 -13  -5   4 145.471 48.3727   3
  12  -5  -4 268.316 43.7151   1
 -12  -5   4 348.317 54.4538   3
 -11  -5   4 47.2042 38.7336   3
  11  -5  -4 25.6046 31.5054   1
 -10  -5   4 32.7969 35.8082   3
  10  -5  -4 -14.145 26.5990   1
 -10  -5   4 67.7530 27.6600   2
 -10   5   4 29.1952 26.6606   3
  -9  -5   4 107.709 36.1944   3
   9  -5  -4 50.6845 26.9135   1
  -9  -5   4 111.455 28.7635   2
  -9   5   4 45.8194 24.4826   3
  -8  -5   4 6.70189 30.2459   3
   8  -5  -4 37.2622 26.0272   1
  -8  -5   4 53.9277 24.8287   2
  -8   5   4 20.5345 21.1729   3
  -7  -5   4 40.5174 25.8347   2
   7  -5  -4 48.6439 24.7332   1
  -7   5   4 38.6517 18.9117   3
   6  -5  -4 -8.3742 21.0203   1
  -6  -5   4 29.8578 24.9681   2
  -6   5   4 24.1647 16.9766   3
   5  -5  -4 27.6806 22.0859   1
  -5  -5   4 10.0361 23.8993   2
  -4  -5   4 22.7982 13.3909   1
   4  -5  -4 29.5571 21.1958   1
  -4  -5   4 15.0493 11.6083   1
  -4  -5   4 52.6789 25.0874   2
   3  -5  -4 3.14257 17.6712   1
  -3  -5   4 -15.856 22.3525   2
  -3  -5   4 3.31978 10.9455   1
  -2  -5   4 315.609 37.1744   2
   2  -5  -4 341.055 30.7123   1
  -2  -5   4 285.658 23.6964   1
   1  -5  -4 781.464 53.7729   1
  -1  -5   4 732.449 60.2769   2
  -1  -5   4 763.134 43.4818   1
   0  -5   4 165.071 31.2824   2
   0  -5   4 146.950 13.9596   1
   0  -5  -4 149.582 23.0393   1
  -1  -5  -4 9.65688 17.4406   1
   1  -5   4 54.6637 10.8771   1
   1  -5   4 -2.9827 24.2003   2
  -1   5  -4 29.2777 11.9366   1
  -2  -5  -4 237.662 29.3910   1
   2  -5   4 317.872 22.7472   1
   2  -5   4 284.553 36.6292   2
  -2   5  -4 260.082 23.1199   1
   3  -5   4 436.104 43.1764   2
   3  -5   4 420.586 32.6725   1
  -3  -5  -4 467.186 39.0932   1
  -3   5  -4 428.673 40.7825   3
  -4  -5  -4 -27.128 22.3006   2
   4  -5   4 29.2996 24.9850   2
   4  -5   4 -4.8050 14.9618   1
  -4  -5  -4 -17.310 18.8523   1
  -4  -5  -4 -40.780 19.5705   3
  -4   5  -4 -9.4488 22.5768   3
  -5  -5  -4 81.1641 27.3576   3
   5  -5   4 125.178 20.0561   1
   5  -5   4 106.502 27.6296   2
  -5  -5  -4 130.245 26.0782   2
  -5  -5  -4 113.617 24.9372   1
  -5   5  -4 87.7016 27.6957   3
   6  -5   4 20.4552 24.4873   2
  -6  -5  -4 9.68740 25.9555   3
  -6  -5  -4 -18.546 19.6588   2
   6  -5   4 8.63003 18.5035   1
  -6   5  -4 -12.225 25.2056   3
   7  -5   4 -3.3565 20.1192   1
   7  -5   4 -0.2345 22.4065   2
  -7  -5  -4 8.06810 19.8199   2
  -7  -5  -4 -9.2507 27.2094   3
  -7   5  -4 -19.607 28.1744   3
  -8  -5  -4 -17.294 30.4220   3
   8  -5   4 -17.003 21.4901   1
  -8  -5  -4 14.8169 20.2935   2
   8  -5   4 -26.925 22.2494   2
  -8   5  -4 10.3449 30.8688   3
  -9  -5  -4 14.8273 33.8172   3
   9  -5   4 29.8133 22.7037   1
   9  -5   4 26.3286 23.7675   2
  -9   5  -4 -30.012 31.4194   3
 -10  -5  -4 17.2501 36.1399   3
  10  -5   4 -44.545 23.5712   1
 -10   5  -4 -8.6388 36.5504   3
 -11  -5  -4 -2.0318 38.3089   3
 -11   5  -4 37.1791 41.1603   3
 -12  -5  -4 21.2634 40.8868   3
 -12   5  -4 16.0788 41.5663   3
 -13   5  -4 166.621 51.2805   3
 -12  -6   4 61.3932 47.4406   3
  12  -6  -4 -13.600 34.3886   1
 -11  -6   4 157.527 46.5464   3
  11  -6  -4 75.3677 34.1932   2
  11  -6  -4 89.3520 34.7255   1
 -10  -6   4 13.3265 39.7429   3
 -10  -6   4 -5.3112 28.9358   2
  10  -6  -4 17.0454 26.9645   1
  -9  -6   4 -12.518 36.9155   3
   9  -6  -4 5.20010 26.1703   1
  -9  -6   4 -14.604 24.2831   2
  -8  -6   4 266.695 37.3354   2
   8  -6  -4 232.214 34.2426   1
  -8  -6   4 253.399 44.2933   3
  -8   6   4 241.993 32.8012   3
   7  -6  -4 818.598 61.0510   1
  -7  -6   4 744.806 65.0235   2
  -7   6   4 758.778 55.0990   3
   6  -6  -4 723.859 57.5820   1
  -6  -6   4 704.470 50.0956   1
  -6  -6   4 746.079 63.5659   2
  -5  -6   4 160.327 20.6863   1
   5  -6  -4 124.146 27.4606   1
  -5  -6   4 182.983 34.2044   2
   4  -6  -4 13.5843 21.9049   1
  -4  -6   4 -22.982 26.0068   2
  -4  -6   4 24.3912 13.9672   1
   3  -6  -4 20.6841 21.4786   1
  -3  -6   4 6.63602 12.8861   1
  -3  -6   4 42.2194 28.0774   2
   2  -6  -4 35.3736 20.1600   1
  -2  -6   4 -10.547 26.0889   2
  -2  -6   4 13.1357 11.9307   1
  -1  -6   4 14.5639 11.2635   1
   1  -6  -4 61.5705 21.2039   1
  -1  -6   4 -1.8646 27.6244   2
   0  -6   4 -25.017 10.3008   1
   0  -6  -4 4.42330 20.4988   1
   0  -6   4 14.8847 28.4479   2
   0  -6  -4 -12.416 24.9065   2
  -1  -6  -4 -19.924 20.0536   1
   1  -6   4 22.4185 11.3086   1
   1  -6   4 -32.311 27.2636   2
  -1  -6  -4 -4.0462 27.0211   2
  -2  -6  -4 16.9289 19.6474   1
  -2  -6  -4 -18.935 27.1409   2
   2  -6   4 12.0293 12.9769   1
   2  -6   4 37.6042 29.3549   2
   3  -6   4 -27.461 26.9196   2
  -3  -6  -4 20.7401 23.4570   3
   3  -6   4 33.6343 14.6643   1
  -3  -6  -4 12.6454 19.9027   1
  -3  -6  -4 3.66336 27.8625   2
  -4  -6  -4 61.3076 28.4643   2
   4  -6   4 47.8834 16.5169   1
   4  -6   4 64.6111 29.9453   2
  -4  -6  -4 16.7162 21.8655   1
  -4  -6  -4 -59.163 22.6251   3
  -4   6  -4 34.0553 27.0577   3
   5  -6   4 79.0241 30.5769   2
  -5  -6  -4 25.1822 26.3473   3
  -5  -6  -4 99.2844 25.3287   1
  -5  -6  -4 63.2084 27.0811   2
   5  -6   4 101.004 20.2607   1
  -5   6  -4 108.236 31.0243   3
   6  -6   4 136.327 22.9073   1
  -6  -6  -4 105.515 28.0500   2
  -6  -6  -4 58.0246 25.8828   1
   6  -6   4 110.437 32.5406   2
  -6  -6  -4 115.963 29.9466   3
  -6   6  -4 112.390 32.5433   3
   7  -6   4 357.111 34.5420   1
  -7  -6  -4 363.402 40.9380   1
   7  -6   4 369.993 43.8578   2
  -7  -6  -4 352.041 43.7470   3
  -7  -6  -4 356.098 39.8960   2
  -7   6  -4 408.071 47.2609   3
  -8  -6  -4 591.956 59.1701   2
   8  -6   4 487.020 43.5893   1
   8  -6   4 533.075 51.5985   2
  -8   6  -4 491.868 54.9666   3
   9  -6   4 136.872 28.5141   1
   9  -6   4 156.025 33.6302   2
  -9  -6  -4 126.495 39.1580   3
  -9   6  -4 111.912 39.5660   3
  10  -6   4 17.4796 25.3675   1
 -10  -6  -4 42.7124 38.3917   3
 -10   6  -4 9.17522 38.4830   3
 -11  -6  -4 -16.548 38.4251   3
 -11   6  -4 31.9164 43.0239   3
  11  -7  -4 73.8739 39.1274   2
  11  -7  -4 45.9672 34.2742   1
  10  -7  -4 63.6257 37.7880   2
 -10  -7   4 45.4589 38.7746   3
  10  -7  -4 5.62653 28.2391   1
  -9  -7   4 16.4208 28.0070   2
   9  -7  -4 30.4989 34.3636   2
  -9  -7   4 -5.6153 37.8613   3
   9  -7  -4 63.8772 29.0765   1
   8  -7  -4 -25.752 24.0717   1
   8  -7  -4 9.35650 32.9972   2
  -8  -7   4 27.0302 30.0982   2
  -8  -7   4 9.96146 38.0583   3
   7  -7  -4 44.5861 35.0975   2
  -7  -7   4 -6.9801 29.1725   2
   7  -7  -4 26.0143 24.8429   1
  -6  -7   4 -0.5055 29.3174   2
   6  -7  -4 31.0969 33.4177   2
   6  -7  -4 -19.385 25.1762   1
   5  -7  -4 33.5423 34.5807   2
   5  -7  -4 -22.848 24.1028   1
  -5  -7   4 31.7065 30.8513   2
   4  -7  -4 -33.830 27.4123   2
  -4  -7   4 39.5818 31.3053   2
   4  -7  -4 25.1611 24.3964   1
   3  -7  -4 55.0287 23.0175   1
   3  -7  -4 -11.436 28.1487   2
  -3  -7   4 10.9283 30.1975   2
  -2  -7   4 12.7939 31.0563   2
   2  -7  -4 -7.2672 19.9852   1
   2  -7  -4 70.3836 33.4973   2
   1  -7  -4 -1.2794 21.1851   1
   1  -7  -4 -31.058 28.0990   2
  -1  -7   4 42.7818 31.1176   2
   0  -7  -4 20.7940 30.9582   2
   0  -7  -4 33.5660 22.7835   1
   0  -7   4 35.4783 31.7669   2
   1  -7   4 60.1513 34.8966   2
  -1  -7  -4 38.3293 24.2597   1
  -1  -7  -4 95.4907 33.8098   2
  -2  -7  -4 -30.832 29.4145   2
  -2  -7  -4 -35.757 21.7438   1
   2  -7   4 -10.251 31.7176   2
  -3  -7  -4 52.2188 31.0973   2
   3  -7   4 -14.372 31.7560   2
  -3  -7  -4 -30.552 23.3539   3
  -3  -7  -4 13.2172 22.0186   1
  -4  -7  -4 -11.270 22.2939   1
   4  -7   4 -0.0666 31.6106   2
  -4  -7  -4 -9.2868 27.2722   2
  -4  -7  -4 -5.6563 24.5190   3
  -5  -7  -4 34.7579 25.8411   3
  -5  -7  -4 40.4798 26.0987   1
   5  -7   4 26.7018 31.8063   2
  -5  -7  -4 19.3950 28.3152   2
  -6  -7  -4 4.81853 26.3276   2
   6  -7   4 -7.7197 32.1045   2
  -6  -7  -4 17.2530 28.7924   3
  -6  -7  -4 18.9199 25.9266   1
  -6   7  -4 -11.848 30.9545   3
  -7  -7  -4 -19.113 29.1323   3
  -7  -7  -4 30.1742 26.7481   2
   7  -7   4 -5.2468 30.4125   2
  -7  -7  -4 -6.8815 24.9291   1
  -7   7  -4 -13.785 32.4934   3
   8  -7   4 -9.0654 31.9031   2
  -8  -7  -4 6.07647 32.5983   3
  -8  -7  -4 -29.376 25.6319   1
  -8   7  -4 -4.6399 35.0770   3
  -9  -7  -4 72.8463 39.0976   3
   9  -7   4 -0.7002 31.6281   2
  -9  -7  -4 -3.0158 25.8229   1
  -9   7  -4 -5.4083 37.6550   3
 -10  -7  -4 21.2518 36.6284   3
 -10  -7  -4 6.79851 27.8837   1
 -10   7  -4 4.08227 41.8926   3
  -9  -8   4 27.8775 42.0860   3
  -9  -8   4 47.0935 34.1311   2
   9  -8  -4 50.1422 41.3646   2
   9  -8  -4 27.1556 30.5662   1
   8  -8  -4 96.4322 43.1535   2
   8  -8  -4 70.8020 29.4282   1
  -8  -8   4 33.6016 32.6940   2
  -8  -8   4 81.4039 37.1111   3
   7  -8  -4 13.1330 39.7190   2
  -7  -8   4 18.0075 30.9790   2
   7  -8  -4 22.5065 27.4606   1
   6  -8  -4 -13.473 27.0665   1
   6  -8  -4 65.0713 39.3906   2
  -6  -8   4 29.7110 32.4229   2
   5  -8  -4 148.754 43.6996   2
  -5  -8   4 110.999 39.2918   2
   5  -8  -4 84.3234 29.7186   1
  -4  -8   4 127.123 39.0382   2
   4  -8  -4 91.9071 37.6640   2
   4  -8  -4 88.0074 29.4394   1
   3  -8  -4 77.3646 25.9587   1
   3  -8  -4 -4.2576 34.2021   2
  -3  -8   4 44.6374 32.8331   2
   2  -8  -4 -1.0202 35.0886   2
  -2  -8   4 0.43661 34.9128   2
   2  -8  -4 45.9094 24.0668   1
   1  -8  -4 71.0320 24.9997   1
   1  -8  -4 26.6313 36.4513   2
  -1  -8   4 5.33995 32.0329   2
   0  -8  -4 27.1709 32.2812   2
   0  -8   4 -25.025 33.8832   2
   0  -8  -4 -19.253 23.4265   1
  -1  -8  -4 -9.7350 34.2735   2
  -1  -8  -4 -2.6350 23.6964   1
   1  -8   4 -6.6223 36.8672   2
   2  -8   4 56.4656 38.6871   2
  -2  -8  -4 -22.872 25.5991   1
  -2  -8  -4 24.0279 34.9408   2
  -3  -8  -4 14.8238 32.7368   2
  -3  -8  -4 -16.585 25.5645   1
   3  -8   4 -0.0286 37.0171   2
  -3  -8  -4 -26.053 26.9119   3
  -4  -8  -4 -46.326 24.8396   3
   4  -8   4 -7.4903 32.8795   2
  -4  -8  -4 23.5053 30.3122   2
  -4  -8  -4 -56.599 22.2396   1
  -5  -8  -4 8.04397 28.0970   3
   5  -8   4 14.5644 34.0011   2
  -5  -8  -4 35.2483 31.8276   2
  -5  -8  -4 6.55777 25.6276   1
  -6  -8  -4 93.4421 32.8623   3
  -6  -8  -4 176.436 37.2764   2
  -6  -8  -4 96.3988 31.0281   1
   6  -8   4 157.121 42.9073   2
  -7  -8  -4 11.8951 33.3316   3
  -7  -8  -4 74.2384 32.2008   2
   7  -8   4 128.883 40.5269   2
  -7  -8  -4 12.2252 29.1986   1
  -8  -8  -4 15.1806 37.0992   3
   8  -8   4 33.9478 37.2361   2
  -8  -8  -4 -15.628 27.8780   1
  -8   8  -4 17.7169 39.0532   3
  -6  -9   4 12.8050 34.9024   2
   6  -9  -4 -3.8403 38.8528   2
   5  -9  -4 47.4965 42.7298   2
  -5  -9   4 -1.6287 33.9750   2
   4  -9  -4 22.0164 42.4565   2
  -4  -9   4 28.0646 38.0658   2
  -3  -9   4 -7.8242 36.9917   2
   3  -9  -4 -6.3564 35.6769   2
  -2  -9   4 20.8176 35.3134   2
   2  -9  -4 11.8041 38.4791   2
  -1  -9   4 18.1525 35.4953   2
   1  -9  -4 43.9818 38.7861   2
   0  -9   4 177.711 47.5074   2
   0  -9  -4 111.595 40.4806   2
  -1  -9  -4 87.9792 39.4314   2
   1  -9   4 177.935 48.5119   2
  -2  -9  -4 -16.216 35.3403   2
   2  -9   4 52.3462 43.2583   2
   3  -9   4 35.2517 42.0744   2
  -3  -9  -4 33.9589 32.0234   3
  -3  -9  -4 61.8794 37.2079   2
  -4  -9  -4 47.8110 36.5945   2
   4  -9   4 29.7199 39.9612   2
  -4  -9  -4 6.77321 32.4779   3
  -5  -9  -4 -10.054 33.5475   2
   5  -9   4 41.7015 41.2227   2
  -5  -9  -4 -5.5724 29.3196   3
 -16   0   5 43.0132 36.4327   3
 -15   0   5 19.5928 34.9748   3
 -14   0   5 -17.619 29.4869   3
 -13   0   5 0.27348 27.3580   3
  13   0  -5 24.5766 26.1985   1
  12   0  -5 15.2007 24.5462   1
 -12   0   5 -29.981 25.8178   3
  11   0  -5 -30.849 23.6967   1
 -11   0   5 -32.892 22.1319   3
 -10   0   5 16.6649 21.0685   3
  10   0  -5 -2.5729 22.3445   1
   9   0  -5 -3.0834 18.5329   1
  -9   0   5 -10.426 18.9111   3
   8   0  -5 -17.979 15.3321   1
  -8   0   5 23.4120 18.0164   3
  -8   0   5 -13.474 17.6039   2
  -7   0   5 -10.276 15.8252   3
  -7   0   5 4.60751 19.0462   2
   7   0  -5 33.8919 18.5213   1
  -6   0   5 1.88507 14.9622   3
   6   0  -5 -6.2585 28.3442   2
   6   0  -5 4.98143 13.9407   1
  -6   0   5 5.54736 19.9376   2
   5   0  -5 -44.956 29.0370   2
  -5   0   5 -26.856 21.0002   2
   5   0  -5 5.31950 16.1135   1
  -5   0   5 1.99168 14.2557   3
   4   0  -5 -24.114 27.9011   2
  -4   0   5 -1.0919 14.1257   1
  -4   0   5 -8.2267 13.9892   3
  -4   0   5 -18.497 21.5012   2
   4   0  -5 9.99544 14.8328   1
   3   0  -5 -8.6662 27.8973   2
  -3   0   5 11.2524 24.6739   2
   3   0  -5 7.37549 15.0631   1
  -3   0   5 4.80206 12.6181   1
  -2   0   5 -4.3305 11.6644   1
  -2   0   5 -5.5780 25.6706   2
   2   0  -5 -21.749 12.9485   1
   2   0  -5 34.4724 32.4330   2
  -1   0   5 5.07386 10.9605   3
   1   0  -5 -4.8330 12.1398   1
  -1   0   5 -13.297 31.0835   2
   1   0  -5 4.03200 27.7460   2
  -1   0   5 4.94204 10.9015   1
   0   0  -5 -1.3884 13.3216   3
   0   0  -5 -9.2657 11.6540   1
   0   0  -5 11.4494 27.2178   2
   0   0   5 54.1456 32.1610   2
   0   0   5 -3.8250 12.5865   3
   1   0   5 -5.5592 14.2610   3
  -1   0  -5 -13.446 23.3298   2
  -1   0  -5 3.65794 14.3038   3
   1   0   5 -24.920 26.5279   2
  -2   0  -5 2.78089 16.9734   2
  -2   0  -5 -18.858 14.3983   3
   2   0   5 3.74545 15.2317   3
   2   0   5 9.83454 24.3057   2
  -3   0  -5 -9.6651 15.0940   3
  -3   0  -5 -15.688 12.1697   2
   3   0   5 2.08372 20.0260   2
   3   0   5 2.22529 15.8070   3
   4   0   5 -23.637 15.2955   2
  -4   0  -5 17.1249 9.97968   2
  -4   0  -5 -2.9784 15.9242   3
   5   0   5 -8.1147 10.1322   2
  -5   0  -5 -9.3864 7.21674   2
  -5   0  -5 4.48970 16.2684   3
  -6   0  -5 25.8898 18.1472   3
  -7   0  -5 -21.950 18.3452   3
  -8   0  -5 -2.3547 20.3420   3
  -9   0  -5 29.4175 22.9982   3
 -10   0  -5 -15.762 24.6294   3
 -11   0  -5 -20.399 27.3371   3
 -12   0  -5 -65.053 28.3886   3
 -13   0  -5 24.2265 33.9581   3
 -14   0  -5 -35.623 33.6280   3
 -15  -1   5 57.6952 36.7180   3
  15  -1  -5 4.25175 31.7502   1
 -15   1   5 56.9445 34.6916   3
 -14  -1   5 45.5360 33.6063   3
  14  -1  -5 57.6318 31.2195   1
 -14   1   5 69.4642 34.0945   3
  13  -1  -5 -62.625 28.0364   1
 -13  -1   5 -8.0531 29.1328   3
 -13   1   5 -3.9994 28.2980   3
  12  -1  -5 105.624 27.2601   1
 -12  -1   5 110.655 30.0750   3
 -12   1   5 37.4869 27.6133   3
 -11  -1   5 60.6781 27.0467   3
 -11  -1   5 76.8206 21.0489   2
  11  -1  -5 65.4811 26.9469   1
  11   1  -5 42.8910 25.2347   1
 -11   1   5 91.3505 26.8197   3
 -10  -1   5 6.84327 22.4614   3
  10  -1  -5 20.7371 20.3365   1
 -10  -1   5 29.4459 20.3909   2
 -10   1   5 5.61179 21.0034   3
  10   1  -5 -29.737 21.5758   1
  -9  -1   5 -21.892 19.6633   2
  -9  -1   5 -5.5048 20.8192   3
   9  -1  -5 -38.052 19.9303   1
   9   1  -5 11.1163 20.1456   1
  -9   1   5 6.40032 19.3175   3
  -8  -1   5 64.3054 23.8859   2
  -8  -1   5 30.3978 20.1088   3
   8  -1  -5 60.4679 20.4082   1
  -8   1   5 69.1515 19.5879   3
   8   1  -5 57.7329 18.0968   1
  -7  -1   5 14.9488 17.5363   3
   7  -1  -5 -14.517 18.6361   1
  -7  -1   5 8.89998 25.7200   2
  -7   1   5 14.0799 16.0105   3
   7   1  -5 -7.2179 16.4672   1
   6  -1  -5 137.148 21.4913   1
   6  -1  -5 154.914 19.9285   3
  -6  -1   5 148.202 32.1335   2
  -6  -1   5 204.769 24.3310   3
   6   1  -5 131.942 19.5079   1
  -6   1   5 137.466 18.8512   3
   5  -1  -5 59.3335 18.4522   1
  -5  -1   5 47.5778 16.1137   1
  -5  -1   5 29.8740 27.8475   2
   5  -1  -5 62.6384 14.6815   3
  -5  -1   5 49.8332 20.1093   3
   5   1  -5 67.9349 21.7630   2
  -5   1   5 41.3490 13.1488   3
   5   1  -5 36.2129 14.8272   1
   4  -1  -5 9.32256 16.2400   1
   4  -1  -5 13.1156 18.6794   2
  -4  -1   5 16.5708 13.1767   1
  -4  -1   5 3.59701 23.9514   2
   4   1  -5 -30.748 19.9020   2
  -4   1   5 6.57592 10.7744   3
   4   1  -5 21.8318 13.1300   1
  -3  -1   5 199.158 29.0544   2
  -3  -1   5 182.927 17.2577   1
   3  -1  -5 180.489 21.4327   1
   3  -1  -5 190.062 24.4302   2
  -3   1   5 187.157 14.7664   3
  -3   1   5 210.397 24.4287   2
   3   1  -5 252.432 28.2970   2
  -3   1   5 194.339 20.7555   1
   3   1  -5 183.168 17.2316   1
   2  -1  -5 654.059 45.3273   2
   2  -1  -5 614.835 42.4844   1
  -2  -1   5 640.191 46.4445   2
   2   1  -5 701.301 47.9922   2
   2   1  -5 548.519 36.7963   1
  -2   1   5 648.931 45.9629   2
  -2   1   5 637.517 41.2101   1
  -1  -1   5 4474.61 233.848   1
   1  -1  -5 4415.40 237.884   2
  -1  -1   5 4534.95 238.924   2
   1  -1  -5 4574.08 236.732   1
  -1  -1   5 4533.88 236.350   3
   1   1  -5 4219.33 233.870   1
  -1   1   5 4463.92 236.299   1
   1   1  -5 4762.36 239.206   2
   0  -1   5 745.948 50.1193   2
   0  -1  -5 700.937 42.9677   3
   0  -1   5 780.266 48.6278   3
   0  -1  -5 736.224 47.7391   1
   0  -1  -5 720.216 48.5655   2
   0   1   5 770.036 50.6717   2
   0   1  -5 739.761 42.5143   1
   0   1   5 721.219 46.6807   1
   0   1   5 819.350 43.5791   3
   0   1  -5 825.844 50.9070   2
   0   1  -5 730.162 49.2165   3
  -1  -1  -5 302.193 25.0110   1
  -1  -1  -5 260.696 24.9974   2
   1  -1   5 283.675 25.2797   2
   1  -1   5 305.484 25.8837   3
  -1  -1  -5 263.009 21.0193   3
  -1   1  -5 258.480 25.3937   2
   1   1   5 298.655 22.2930   3
  -1   1  -5 290.938 26.2581   3
   2  -1   5 14.0129 16.0699   3
  -2  -1  -5 27.2263 13.2356   3
   2  -1   5 -0.1101 14.2390   2
  -2  -1  -5 -12.058 14.2649   2
  -2   1  -5 3.83555 16.8961   3
   2   1   5 -7.7993 13.6691   3
  -2   1  -5 -9.1623 13.5637   2
   3  -1   5 32.2365 13.5502   2
  -3  -1  -5 22.4026 13.9683   2
  -3  -1  -5 35.7675 15.3478   3
   3   1   5 46.7318 16.4677   3
  -3   1  -5 38.9148 13.3148   2
  -3   1  -5 61.7731 17.7836   3
  -3   1  -5 58.6560 13.4553   1
   4  -1   5 62.0599 13.7176   2
  -4  -1  -5 50.3784 17.0727   3
  -4  -1  -5 51.7651 15.6828   2
  -4   1  -5 80.4845 13.5360   2
  -4   1  -5 74.8143 19.2468   3
   5  -1   5 27.0507 11.7953   2
  -5  -1  -5 -5.9367 16.4088   3
  -5  -1  -5 -23.248 11.3195   2
  -5   1  -5 37.6843 19.0307   3
  -5   1  -5 18.9895 11.2056   2
  -6  -1  -5 7.79415 17.8584   3
   6  -1   5 15.8560 11.1301   2
  -6   1  -5 14.9872 19.4826   3
   7  -1   5 -12.276 10.7985   2
  -7  -1  -5 11.2899 19.8813   3
  -7   1  -5 -20.676 19.7476   3
  -8  -1  -5 34.3407 23.0571   3
  -8   1  -5 17.0571 23.2983   3
  -9  -1  -5 32.9689 24.7940   3
  -9   1  -5 -12.020 23.5624   3
 -10  -1  -5 26.2623 26.8160   3
 -10   1  -5 30.5194 27.5354   3
 -11  -1  -5 20.3508 28.6556   3
 -11   1  -5 -43.478 26.8069   3
 -12  -1  -5 -33.390 29.1527   3
 -12   1  -5 53.1883 32.9814   3
 -13  -1  -5 18.4850 34.4889   3
 -13   1  -5 38.4557 35.2471   3
 -14  -1  -5 97.9661 41.0904   3
 -14   1  -5 93.7768 40.1388   3
  15  -2  -5 55.9986 33.0205   1
 -15  -2   5 -53.693 33.9111   3
 -15   2   5 -9.5155 34.9090   3
 -14  -2   5 2.50078 32.9522   3
  14  -2  -5 -23.932 30.3902   1
 -14   2   5 20.5857 33.4562   3
  13  -2  -5 69.4299 32.8790   1
 -13  -2   5 107.303 35.0731   3
 -13   2   5 81.2142 34.0281   3
  12  -2  -5 20.5334 26.5128   1
 -12  -2   5 34.5157 28.9101   3
 -12   2   5 -9.3309 26.8323   3
 -11  -2   5 11.8582 26.7120   3
  11  -2  -5 42.5475 27.7824   1
 -11  -2   5 1.56740 22.1502   2
 -11   2   5 5.81954 25.3758   3
 -10  -2   5 79.3377 27.6967   2
 -10  -2   5 104.450 27.9498   3
  10  -2  -5 112.136 26.6203   1
 -10   2   5 89.1694 26.1920   3
   9  -2  -5 567.676 46.4982   1
  -9  -2   5 636.376 54.5600   3
  -9  -2   5 549.005 51.8021   2
  -9   2   5 586.996 46.4251   3
   8  -2  -5 766.548 56.6055   1
  -8  -2   5 737.388 59.5203   3
  -8  -2   5 753.005 66.3527   2
  -8   2   5 832.099 56.2388   3
   7  -2  -5 8.52015 17.3364   1
  -7  -2   5 -13.834 25.0757   2
  -7  -2   5 0.04685 20.2640   3
  -7   2   5 15.0706 17.3479   3
   7   2  -5 -7.0684 16.0484   1
   6  -2  -5 279.965 28.8533   1
   6  -2  -5 316.757 25.1036   3
  -6  -2   5 307.162 34.1744   2
  -6  -2   5 285.861 31.7590   3
   6   2  -5 272.492 25.1529   1
  -6   2   5 322.830 27.3618   3
  -5  -2   5 -8.8115 11.7741   1
   5  -2  -5 16.3561 17.7970   1
  -5  -2   5 0.84597 21.1593   2
   5  -2  -5 -19.307 10.7230   3
   5   2  -5 -4.2897 12.9313   1
  -5   2   5 -2.1287 13.1002   3
   4  -2  -5 15.7854 9.78374   3
  -4  -2   5 3.11923 11.4232   1
  -4  -2   5 19.2436 20.1915   2
   4  -2  -5 9.61915 15.4648   1
  -4   2   5 4.99469 11.1447   3
   4   2  -5 17.3845 10.7393   1
  -3  -2   5 43.4566 17.7959   2
  -3  -2   5 52.0163 10.0325   1
   3  -2  -5 38.0891 17.4726   1
   3   2  -5 33.2211 9.61465   1
  -2  -2   5 16.6939 17.8579   2
  -2  -2   5 25.2821 7.11484   1
   2  -2  -5 46.5206 16.8693   1
   2   2  -5 22.9388 7.06079   1
   2   2  -5 42.9824 21.8748   2
  -1  -2   5 56.1432 15.5557   3
  -1  -2   5 24.0545 16.0838   2
   1  -2  -5 65.0568 17.7660   1
   1   2  -5 53.5392 19.4264   2
  -1   2   5 27.5911 15.1944   1
   0  -2  -5 21.3486 16.2105   1
   0  -2   5 71.6458 16.7021   3
   0  -2  -5 58.4374 11.0053   3
   0  -2   5 46.4443 19.6430   2
   0   2  -5 65.5941 19.2753   2
   0   2  -5 46.6216 6.46557   1
   0   2  -5 69.4482 17.5618   3
   0   2   5 17.6729 15.0793   1
  -1  -2  -5 7.58047 15.1970   1
  -1  -2  -5 -0.2281 11.7655   3
   1  -2   5 19.7833 17.5413   2
  -1   2  -5 1.65130 16.6287   3
  -1   2  -5 20.4248 8.68493   1
   1   2   5 5.72606 11.4075   3
  -1   2  -5 22.0789 16.8813   2
  -2  -2  -5 67.0097 15.4359   3
   2  -2   5 92.2131 19.1497   2
   2   2   5 88.2758 15.8373   3
  -2   2  -5 80.6022 20.0215   3
  -2   2  -5 67.1543 18.0639   2
  -2   2  -5 88.9773 12.7991   1
  -3  -2  -5 193.228 21.3135   3
   3  -2   5 179.970 21.7223   2
  -3   2  -5 208.104 22.1013   2
  -3   2  -5 188.250 18.3763   1
  -3   2  -5 178.335 24.7794   3
   4  -2   5 -0.6503 14.6099   2
  -4  -2  -5 2.65216 16.3718   3
  -4   2  -5 -1.1690 19.0560   3
  -4   2  -5 31.0882 15.0583   2
  -5  -2  -5 44.8153 19.2615   3
  -5  -2  -5 57.9927 12.7138   2
   5  -2   5 31.6256 15.1272   2
  -5   2  -5 34.4769 20.8151   3
  -6  -2  -5 1001.39 55.3343   2
   6  -2   5 968.132 59.3167   2
  -6  -2  -5 1006.85 55.7156   2
  -6  -2  -5 898.073 65.9593   3
  -6   2  -5 946.559 67.8100   3
  -7  -2  -5 334.065 36.4897   3
   7  -2   5 327.566 29.6370   2
  -7   2  -5 305.135 36.5376   3
  -8  -2  -5 14.0573 24.6628   3
   8  -2   5 68.1911 15.3722   2
  -8   2  -5 45.3130 26.1402   3
  -9  -2  -5 28.0404 26.8410   3
  -9   2  -5 17.5834 27.2982   3
 -10  -2  -5 101.790 31.7049   3
 -10   2  -5 87.5007 31.9081   3
 -11  -2  -5 41.9865 32.2079   3
 -11   2  -5 75.3672 32.3757   3
 -12  -2  -5 27.2509 34.9404   3
 -12   2  -5 55.8314 33.9620   3
 -13  -2  -5 -31.543 35.4536   3
 -13   2  -5 -37.830 33.3319   3
 -14  -2  -5 12.6317 39.7490   3
 -14   2  -5 -46.143 33.5157   3
 -15  -3   5 -8.5517 35.6685   3
  14  -3  -5 29.9078 31.9857   1
 -14  -3   5 47.1206 35.9893   3
 -14   3   5 34.7674 36.1077   3
  13  -3  -5 31.0215 27.7020   1
 -13  -3   5 57.2957 34.7409   3
 -13   3   5 70.1266 34.8443   3
  12  -3  -5 5.41793 28.4694   1
 -12  -3   5 -13.671 30.9759   3
 -12   3   5 11.7399 30.9290   3
  11  -3  -5 -47.276 24.5628   1
 -11  -3   5 35.8309 29.3478   3
 -11  -3   5 -35.291 30.5653   2
 -11   3   5 22.1686 28.4862   3
  10  -3  -5 3.60722 25.0389   1
 -10  -3   5 0.50710 27.7712   3
 -10  -3   5 32.7081 33.3391   2
 -10   3   5 -34.075 24.4092   3
  -9  -3   5 8.92132 29.4572   2
  -9  -3   5 3.28464 25.9074   3
   9  -3  -5 -33.920 23.3520   1
  -9   3   5 -0.2591 23.0829   3
  -8  -3   5 -7.2367 24.8039   2
  -8  -3   5 5.18097 24.3742   3
   8  -3  -5 2.29423 20.7523   1
  -8   3   5 -18.668 20.2449   3
  -7  -3   5 -24.184 21.0127   2
  -7  -3   5 2.30612 22.6544   3
   7  -3  -5 2.16170 20.6822   1
  -7   3   5 -14.915 17.7094   3
  -6  -3   5 31.9618 20.6573   2
   6  -3  -5 5.81197 13.2519   3
   6  -3  -5 -4.6262 18.5281   1
  -6   3   5 3.44296 15.5254   3
   5  -3  -5 186.311 25.4907   1
   5  -3  -5 169.951 17.3612   3
  -5  -3   5 158.751 17.5268   1
  -5  -3   5 146.765 23.4977   2
  -5   3   5 159.270 17.8429   3
  -4  -3   5 10.3138 18.6998   2
   4  -3  -5 49.8632 18.9688   1
   4  -3  -5 20.8510 10.6791   3
  -4  -3   5 18.1543 10.2585   1
  -4   3   5 31.5137 10.6684   3
   3  -3  -5 -7.1794 9.11796   3
  -3  -3   5 -30.411 7.26968   1
  -3  -3   5 19.4877 19.7677   2
   3  -3  -5 14.5582 16.8939   1
   2  -3  -5 19.2448 16.7265   1
  -2  -3   5 -35.013 17.3021   2
   2  -3  -5 -9.3179 8.95180   3
  -1  -3   5 -14.811 18.9538   2
   1  -3  -5 -3.6177 15.9699   1
   0  -3  -5 105.722 14.3091   3
   0  -3  -5 89.5284 18.6804   1
   0  -3   5 56.3746 19.6242   2
  -1  -3  -5 628.520 44.0330   1
   1  -3   5 543.099 45.3564   2
  -1  -3  -5 632.247 40.5607   3
  -1   3  -5 577.058 33.8004   1
  -1   3  -5 553.244 46.2620   3
  -2  -3  -5 147.494 23.7116   1
   2  -3   5 199.810 25.5271   2
  -2  -3  -5 155.188 20.4365   3
  -2   3  -5 184.726 24.7229   3
  -2   3  -5 176.224 15.7680   1
  -3  -3  -5 -3.3535 14.9023   3
   3  -3   5 4.09922 17.0500   2
  -3   3  -5 -3.9795 11.3980   1
  -3   3  -5 -4.6797 18.8162   3
   4  -3   5 -11.949 17.5345   2
  -4  -3  -5 -0.6330 17.4233   3
  -4   3  -5 10.2116 20.7550   3
  -5  -3  -5 18.0236 19.6744   3
   5  -3   5 -0.1709 16.6697   2
  -5   3  -5 -23.446 20.7461   3
   6  -3   5 9.61916 17.2033   2
  -6  -3  -5 22.8547 14.6008   2
  -6  -3  -5 2.89648 21.4515   3
  -6   3  -5 -26.714 22.1102   3
   7  -3   5 34.0577 18.1665   2
  -7  -3  -5 -3.2726 12.4637   2
  -7  -3  -5 19.7767 23.6896   3
  -7   3  -5 30.5661 25.8085   3
  -8  -3  -5 77.5047 27.7931   3
  -8  -3  -5 40.7499 13.0844   2
   8  -3   5 58.6635 18.8897   2
  -8   3  -5 69.1820 28.9545   3
  -9  -3  -5 31.4764 29.3349   3
   9  -3   5 60.9919 18.5012   2
  -9   3  -5 20.4425 29.3715   3
 -10  -3  -5 100.512 34.5269   3
 -10   3  -5 59.9683 33.2284   3
 -11  -3  -5 16.1260 33.0609   3
 -11   3  -5 101.309 35.4902   3
 -12  -3  -5 4.30129 35.4473   3
 -12   3  -5 27.0677 34.3478   3
 -13  -3  -5 9.49365 39.2133   3
 -13   3  -5 0.25877 35.9002   3
 -14   3  -5 -25.055 36.7556   3
  14  -4  -5 0.52266 31.0392   1
 -14  -4   5 3.24063 36.9173   3
  13  -4  -5 85.5837 36.3824   1
 -13  -4   5 49.3278 37.3019   3
 -12  -4   5 44.8807 35.1909   3
  12  -4  -5 14.2213 27.7236   1
 -12   4   5 38.6661 33.8454   3
 -11  -4   5 90.7947 36.0239   3
  11  -4  -5 29.7627 31.4366   1
 -11   4   5 68.0718 31.3441   3
  10  -4  -5 -4.9223 24.7288   1
 -10  -4   5 31.5703 31.3115   2
 -10  -4   5 140.050 35.9381   3
 -10   4   5 29.6448 27.6255   3
   9  -4  -5 168.061 32.6610   1
  -9  -4   5 179.370 35.7040   3
  -9  -4   5 208.692 33.6966   2
  -9   4   5 187.720 31.2998   3
   8  -4  -5 471.965 43.7411   1
  -8  -4   5 563.696 50.5439   3
  -8  -4   5 534.730 46.7130   2
  -8   4   5 474.167 41.1228   3
  -7  -4   5 11.6599 22.3974   2
   7  -4  -5 -15.296 21.3013   1
  -7   4   5 -3.2422 17.1677   3
  -6  -4   5 37.2414 22.4727   2
   6  -4  -5 29.0590 20.3763   1
  -6   4   5 29.5317 15.3688   3
  -5  -4   5 298.997 25.2211   1
  -5  -4   5 303.224 34.7795   2
   5  -4  -5 390.152 34.2226   1
   5  -4  -5 320.712 25.2126   3
  -5   4   5 284.113 24.8061   3
  -4  -4   5 205.872 30.2511   2
   4  -4  -5 204.222 19.9628   3
  -4  -4   5 251.573 18.7521   1
   4  -4  -5 274.453 28.2085   1
  -3  -4   5 57.0368 9.37960   1
  -3  -4   5 81.6576 11.0143   1
   3  -4  -5 102.481 21.0480   1
  -3  -4   5 60.0595 23.7145   2
   3  -4  -5 65.0012 13.7030   3
  -2  -4   5 -2.1328 6.20625   1
   2  -4  -5 -16.180 11.0003   3
   2  -4  -5 2.88457 17.4808   1
  -2  -4   5 -1.5685 20.7587   2
   1  -4  -5 3.52577 11.1479   3
  -1  -4   5 22.4386 20.5624   2
   1  -4  -5 11.2779 16.9704   1
   0  -4  -5 53.1612 18.2081   1
   0  -4   5 35.9959 23.1134   2
  -1  -4  -5 254.541 27.5713   1
  -1  -4  -5 198.213 22.7899   3
   1  -4   5 284.427 31.5101   2
   1  -4   5 251.356 18.7628   1
  -1   4  -5 252.168 20.0073   1
  -2  -4  -5 22.5565 18.6326   1
  -2  -4  -5 7.77259 17.0272   3
   2  -4   5 40.3019 22.3715   2
   2  -4   5 31.8091 10.8631   1
  -2   4  -5 -22.301 19.0662   3
  -2   4  -5 26.6843 11.2941   1
  -3  -4  -5 55.4957 21.1445   1
   3  -4   5 54.7351 13.8811   1
   3  -4   5 53.4350 21.8839   2
  -3  -4  -5 50.8802 19.0834   3
  -3   4  -5 58.4875 23.2843   3
  -3   4  -5 26.9653 12.8636   1
  -4  -4  -5 292.350 30.6080   3
   4  -4   5 359.501 34.0561   2
   4  -4   5 287.704 24.5723   1
  -4   4  -5 156.738 30.0303   3
  -5  -4  -5 8.48850 18.7527   2
   5  -4   5 -12.987 15.9757   1
   5  -4   5 -10.717 19.7109   2
  -5  -4  -5 -17.729 21.0393   3
  -5   4  -5 -4.3359 23.1143   3
   6  -4   5 682.757 53.8785   2
  -6  -4  -5 720.370 50.6178   2
  -6  -4  -5 740.163 60.5422   3
   6  -4   5 705.430 50.7431   1
  -6   4  -5 729.796 62.4121   3
  -7  -4  -5 652.743 48.6210   2
   7  -4   5 726.058 51.2865   1
   7  -4   5 695.359 54.1516   2
  -7  -4  -5 779.236 62.7791   3
  -7   4  -5 756.765 60.9085   3
  -8  -4  -5 1.77105 28.8923   3
   8  -4   5 33.7760 21.7968   2
  -8  -4  -5 27.2915 16.7256   2
  -8   4  -5 3.13086 29.3215   3
  -9  -4  -5 -38.483 29.8712   3
   9  -4   5 19.6102 20.3229   2
  -9   4  -5 8.81305 31.1450   3
 -10  -4  -5 -1.1377 32.8506   3
 -10   4  -5 -2.0930 33.6744   3
 -11  -4  -5 -62.350 33.6477   3
 -11   4  -5 -14.270 35.1328   3
 -12  -4  -5 -24.236 36.9731   3
 -12   4  -5 55.7723 40.1309   3
 -13  -4  -5 -5.7444 43.2604   3
 -13   4  -5 34.8753 41.9782   3
  13  -5  -5 -0.9894 30.6965   1
 -13  -5   5 30.5886 38.7651   3
  12  -5  -5 32.9542 31.2085   1
 -12  -5   5 23.3461 40.3863   3
  11  -5  -5 16.0088 27.9542   1
 -11  -5   5 60.3013 38.3432   3
  10  -5  -5 92.7233 30.5840   1
 -10  -5   5 116.504 32.5630   2
 -10  -5   5 119.288 38.6380   3
   9  -5  -5 -53.929 23.5059   1
  -9  -5   5 7.97908 33.3277   3
  -9  -5   5 53.1852 27.0158   2
  -9   5   5 27.7565 21.3969   3
   8  -5  -5 -13.346 23.3020   1
  -8  -5   5 -4.7876 31.8532   3
  -8  -5   5 -7.1114 23.3104   2
  -8   5   5 30.1454 19.1705   3
  -7  -5   5 11.7996 23.2201   2
   7  -5  -5 9.64062 23.3607   1
  -7   5   5 -0.7146 16.4211   3
   6  -5  -5 -1.6700 21.7779   1
  -6  -5   5 16.3659 24.6608   2
  -6   5   5 -18.776 14.2269   3
  -5  -5   5 29.8761 23.7803   2
  -5  -5   5 38.8293 12.5186   1
   5  -5  -5 19.8546 22.2834   1
  -4  -5   5 161.835 31.1638   2
   4  -5  -5 173.043 26.6614   1
  -4  -5   5 159.002 15.3327   1
  -4  -5   5 140.674 16.4683   1
   4  -5  -5 133.371 19.2265   3
  -3  -5   5 315.679 37.6540   2
   3  -5  -5 283.949 31.0823   1
   3  -5  -5 318.639 27.1097   3
  -3  -5   5 338.183 22.8359   1
  -3  -5   5 329.145 23.8861   1
  -2  -5   5 380.942 40.8514   2
  -2  -5   5 406.971 24.8772   1
   2  -5  -5 432.584 34.1986   3
   2  -5  -5 408.238 36.1356   1
   1  -5  -5 645.795 48.1146   1
  -1  -5   5 616.112 54.9606   2
   0  -5   5 34.3343 26.2939   2
   0  -5  -5 27.3962 19.1021   1
   0  -5   5 38.0746 7.96977   1
   1  -5   5 180.127 15.7128   1
  -1  -5  -5 171.046 25.6420   1
   1  -5   5 263.396 35.0920   2
  -1   5  -5 192.075 16.9457   1
   2  -5   5 121.937 14.5757   1
  -2  -5  -5 67.0204 20.9681   3
   2  -5   5 87.1497 28.0744   2
  -2  -5  -5 95.1379 22.3682   1
  -2   5  -5 111.032 15.5118   1
  -3  -5  -5 171.595 25.7394   1
   3  -5   5 142.467 17.0488   1
  -3  -5  -5 100.685 22.8350   3
   3  -5   5 140.747 30.3183   2
  -3   5  -5 139.970 28.6122   3
  -4  -5  -5 45.8514 24.7884   2
  -4  -5  -5 46.4242 23.0514   3
   4  -5   5 74.0896 16.8924   1
  -4  -5  -5 95.4512 24.3451   1
  -4   5  -5 82.7524 27.1171   3
  -5  -5  -5 -1.2585 22.0681   1
  -5  -5  -5 -7.6572 21.8670   2
   5  -5   5 6.73387 16.6720   1
   5  -5   5 -6.3243 24.3913   2
  -5  -5  -5 -15.718 22.4437   3
  -5   5  -5 -2.2024 25.2885   3
   6  -5   5 2.49239 23.9170   2
  -6  -5  -5 -7.0830 24.8224   3
  -6  -5  -5 -26.575 20.2400   2
   6  -5   5 -8.5288 18.3956   1
  -6   5  -5 54.5915 28.3671   3
  -7  -5  -5 50.6865 30.6767   3
   7  -5   5 -0.1829 23.1950   2
  -7  -5  -5 56.5813 21.7363   2
   7  -5   5 21.2680 21.2647   1
  -7   5  -5 33.2431 29.8717   3
   8  -5   5 70.9286 22.4652   1
  -8  -5  -5 42.2723 32.1696   3
   8  -5   5 -4.4342 22.8971   2
  -8  -5  -5 4.63813 30.0231   2
  -8   5  -5 -39.511 30.6023   3
  -9  -5  -5 19.5578 33.1552   3
   9  -5   5 49.2276 25.2503   2
  -9   5  -5 30.1026 35.3578   3
 -10  -5  -5 92.8556 38.7319   3
 -10   5  -5 137.405 42.6947   3
 -11  -5  -5 22.2479 36.8735   3
 -11   5  -5 -73.030 37.8455   3
 -12  -5  -5 1.98786 40.3186   3
 -12   5  -5 16.3052 41.3461   3
 -12  -6   5 63.8087 45.4004   3
  12  -6  -5 111.315 37.5222   1
 -11  -6   5 66.8776 43.7863   3
  11  -6  -5 -7.7041 28.4683   1
 -10  -6   5 14.6871 29.2158   2
  10  -6  -5 2.96679 27.2562   1
 -10  -6   5 -57.499 36.5512   3
   9  -6  -5 -15.380 25.5071   1
  -9  -6   5 52.1464 28.7278   2
  -9  -6   5 57.7049 36.6369   3
  -8  -6   5 -15.038 26.5184   2
  -8  -6   5 17.3103 36.0698   3
   8  -6  -5 -20.964 24.6667   1
   7  -6  -5 135.716 30.2006   1
  -7  -6   5 162.865 34.3101   2
  -6  -6   5 274.375 38.1961   2
  -6  -6   5 267.908 26.7706   1
   6  -6  -5 283.193 34.4793   1
  -5  -6   5 54.4373 16.0247   1
  -5  -6   5 61.2715 31.3300   2
   5  -6  -5 119.734 27.6420   1
  -4  -6   5 9.19052 12.1667   1
   4  -6  -5 24.9753 22.3642   1
  -4  -6   5 13.0450 27.9029   2
   3  -6  -5 22.6475 21.5309   1
  -3  -6   5 12.9519 11.4244   1
  -3  -6   5 -4.9597 27.2040   2
  -2  -6   5 0.04017 8.95148   1
   2  -6  -5 -18.884 20.4656   1
  -2  -6   5 -1.6227 27.7697   2
  -1  -6   5 6.39424 27.7102   2
  -1  -6   5 -11.049 7.77379   1
   1  -6  -5 26.6226 21.4641   1
   0  -6  -5 15.5192 22.4544   1
   0  -6   5 -18.219 27.7044   2
   0  -6   5 20.5280 9.30740   1
   1  -6   5 82.3425 12.5845   1
  -1  -6  -5 75.5832 24.9775   1
   1  -6   5 79.8534 31.5745   2
   2  -6   5 201.565 35.9390   2
  -2  -6  -5 154.541 27.4131   3
   2  -6   5 199.815 18.1631   1
  -2  -6  -5 186.231 27.6670   1
  -2  -6  -5 136.037 32.2293   2
  -3  -6  -5 22.7890 27.4543   2
  -3  -6  -5 91.7691 26.2250   3
   3  -6   5 149.332 17.3734   1
   3  -6   5 144.663 34.4730   2
  -3  -6  -5 101.869 25.5476   1
   4  -6   5 -1.5268 14.7836   1
  -4  -6  -5 -10.823 25.9063   2
  -4  -6  -5 -12.355 21.6645   1
  -4  -6  -5 -19.810 21.5323   3
  -4   6  -5 -17.890 26.3352   3
  -5  -6  -5 -20.138 24.5827   2
  -5  -6  -5 54.4158 24.9444   1
  -5  -6  -5 -3.6111 23.7486   3
   5  -6   5 47.4421 17.7393   1
  -5   6  -5 50.6395 30.7520   3
  -6  -6  -5 12.9015 24.6980   1
   6  -6   5 6.31600 26.0669   2
   6  -6   5 0.13160 18.3613   1
  -6  -6  -5 -16.054 23.6029   2
  -6  -6  -5 40.3808 28.3943   3
  -6   6  -5 3.79942 30.7620   3
  -7  -6  -5 1.84620 24.8127   1
   7  -6   5 14.0868 28.2645   2
  -7  -6  -5 48.3312 28.9212   3
  -7  -6  -5 -35.985 23.0200   2
   7  -6   5 9.39657 20.6180   1
  -7   6  -5 33.1560 31.9611   3
   8  -6   5 155.597 27.5831   1
   8  -6   5 237.259 36.7593   2
  -8  -6  -5 117.814 36.0612   3
  -8   6  -5 175.642 40.1337   3
   9  -6   5 52.3720 29.5861   2
  -9  -6  -5 42.7715 36.6540   3
  -9   6  -5 53.6751 38.5138   3
 -10  -6  -5 31.7085 38.8880   3
 -10   6  -5 2.34034 39.9250   3
 -11  -6  -5 -37.844 39.3312   3
 -11   6  -5 67.2980 44.8666   3
  11  -7  -5 75.9089 33.5086   1
  11  -7  -5 185.190 41.0419   2
  10  -7  -5 83.4471 35.8085   2
  10  -7  -5 -29.057 29.0386   1
 -10  -7   5 60.9613 44.7300   3
   9  -7  -5 71.2619 36.5827   2
  -9  -7   5 87.7701 39.2154   3
   9  -7  -5 7.91872 29.1412   1
  -9  -7   5 -26.905 26.1336   2
  -8  -7   5 -15.697 28.5045   2
   8  -7  -5 20.4830 25.9393   1
  -8  -7   5 -12.292 35.4812   3
   7  -7  -5 8.97911 24.8440   1
  -7  -7   5 39.6650 30.6259   2
   6  -7  -5 4.70605 26.8049   1
  -6  -7   5 52.0867 32.2408   2
  -5  -7   5 115.589 36.5491   2
   5  -7  -5 122.883 30.4626   1
   4  -7  -5 91.7603 26.5042   1
  -4  -7   5 89.5505 31.7137   2
  -3  -7   5 252.719 43.4953   2
   3  -7  -5 257.078 33.1487   1
  -2  -7   5 -25.771 29.9444   2
   2  -7  -5 99.6062 24.8700   1
   1  -7  -5 397.884 40.3108   1
  -1  -7   5 411.199 48.6078   2
   0  -7   5 107.425 34.2071   2
   0  -7  -5 75.9308 31.8328   2
   0  -7  -5 147.280 28.6282   1
  -1  -7  -5 58.5733 33.8710   2
  -1  -7  -5 -17.187 22.1534   1
   1  -7   5 30.1097 32.9115   2
   2  -7   5 14.4792 30.6709   2
  -2  -7  -5 15.2448 23.1341   3
  -2  -7  -5 -32.657 28.6340   2
  -2  -7  -5 12.9902 24.8361   1
  -3  -7  -5 29.8951 25.7608   3
  -3  -7  -5 22.7715 22.8428   1
  -3  -7  -5 26.8356 30.3164   2
   3  -7   5 80.3562 33.9492   2
  -4  -7  -5 -21.216 26.5536   2
  -4  -7  -5 -2.6481 24.5180   3
   4  -7   5 5.11665 33.0728   2
  -4  -7  -5 18.9211 24.1925   1
  -5  -7  -5 -24.483 25.1867   3
  -5  -7  -5 14.6862 24.1804   1
   5  -7   5 14.1119 32.2173   2
  -5  -7  -5 13.8054 26.4118   2
   6  -7   5 3.96953 32.0148   2
  -6  -7  -5 21.7654 27.1029   2
  -6  -7  -5 2.06705 27.1712   3
  -6  -7  -5 -42.248 23.5447   1
  -6   7  -5 35.4198 34.3737   3
  -7  -7  -5 -1.8111 27.1228   2
   7  -7   5 -5.0457 32.1045   2
  -7  -7  -5 -11.629 25.1436   1
  -7  -7  -5 36.2556 32.5431   3
  -7   7  -5 9.38794 34.6480   3
   8  -7   5 15.4678 33.2837   2
  -8  -7  -5 -22.398 25.1386   1
  -8  -7  -5 54.6776 36.3439   3
  -8   7  -5 -33.613 35.1653   3
  -9  -7  -5 29.4533 29.0651   1
   9  -7   5 2.14460 31.3659   2
  -9  -7  -5 -19.230 35.3549   3
  -9   7  -5 41.8958 41.6248   3
 -10  -7  -5 -34.690 26.8199   1
 -10  -7  -5 -13.965 37.2232   3
 -10   7  -5 35.1281 43.7582   3
   9  -8  -5 71.8915 43.0983   2
  -9  -8   5 0.61331 56.0647   3
   9  -8  -5 144.359 35.2056   1
  -9  -8   5 30.1029 33.4409   2
   8  -8  -5 41.6195 39.0971   2
   8  -8  -5 62.7775 28.9374   1
  -8  -8   5 31.3879 39.4030   3
  -8  -8   5 21.9746 30.5400   2
   7  -8  -5 20.9783 28.0631   1
  -7  -8   5 -12.471 32.8664   2
   7  -8  -5 16.3395 38.8280   2
  -6  -8   5 36.6461 35.1221   2
   6  -8  -5 -1.2996 27.3209   1
   6  -8  -5 86.6046 38.6602   2
   5  -8  -5 42.4808 35.5536   2
   5  -8  -5 26.7690 28.6636   1
  -5  -8   5 -8.1511 30.6118   2
   4  -8  -5 66.0702 39.4539   2
   4  -8  -5 126.612 30.6566   1
  -4  -8   5 84.2559 38.7064   2
   3  -8  -5 84.0484 39.4911   2
  -3  -8   5 14.5759 31.6360   2
   3  -8  -5 32.4615 26.6985   1
   2  -8  -5 56.7766 25.8507   1
  -2  -8   5 6.37689 34.3851   2
   2  -8  -5 21.7907 34.1035   2
   1  -8  -5 90.2022 25.0442   1
   1  -8  -5 -3.7414 30.9868   2
  -1  -8   5 -17.190 35.0983   2
   0  -8  -5 -9.3547 33.1852   2
   0  -8  -5 40.5420 26.4260   1
   0  -8   5 -19.655 33.2069   2
  -1  -8  -5 9.97555 25.0014   1
  -1  -8  -5 22.6779 33.1873   2
   1  -8   5 31.9191 35.7290   2
  -2  -8  -5 76.6534 35.5418   2
   2  -8   5 91.4710 40.9981   2
  -2  -8  -5 31.7109 27.7378   3
  -2  -8  -5 -11.553 25.4050   1
  -3  -8  -5 24.8249 34.8756   2
   3  -8   5 70.3171 40.5580   2
  -3  -8  -5 77.8111 29.4589   3
  -3  -8  -5 23.1257 27.6312   1
  -4  -8  -5 66.2720 33.5993   2
  -4  -8  -5 46.9806 26.8252   1
  -4  -8  -5 40.3954 29.9296   3
   4  -8   5 125.149 40.9060   2
  -5  -8  -5 12.0233 25.7323   1
   5  -8   5 55.9657 36.4472   2
  -5  -8  -5 -23.336 28.1638   3
  -5  -8  -5 50.7730 31.8686   2
  -6  -8  -5 -2.6179 28.0393   2
  -6  -8  -5 -13.888 26.9217   1
  -6  -8  -5 62.0353 29.5229   3
   6  -8   5 8.22556 35.6587   2
  -7  -8  -5 -38.567 27.8415   1
  -7  -8  -5 50.3962 34.3660   3
   7  -8   5 17.5569 34.0636   2
  -8  -8  -5 41.6380 30.9145   1
   8  -8   5 69.2016 38.8532   2
  -8  -8  -5 37.8987 34.3271   3
  -8   8  -5 -50.403 39.2960   3
   6  -9  -5 53.0235 45.6677   2
  -6  -9   5 -12.028 33.6140   2
   6  -9  -5 -0.5599 30.3339   1
   5  -9  -5 -28.916 30.8579   1
  -5  -9   5 159.777 44.6688   2
   5  -9  -5 90.9108 43.5175   2
   4  -9  -5 -8.0665 30.5605   1
   4  -9  -5 29.0687 41.3606   2
  -4  -9   5 13.6059 36.5737   2
  -3  -9   5 -11.518 34.1852   2
   3  -9  -5 63.4643 38.5325   2
   3  -9  -5 54.5424 29.2594   1
   2  -9  -5 27.6610 39.4456   2
   2  -9  -5 15.5133 27.4250   1
  -2  -9   5 -15.291 37.6033   2
   1  -9  -5 2.50064 37.9042   2
  -1  -9   5 -23.723 35.4366   2
   1  -9  -5 16.3729 25.8531   1
   0  -9  -5 80.4050 39.0797   2
   0  -9   5 75.2849 43.3938   2
   0  -9  -5 87.9407 30.0833   1
  -1  -9  -5 172.627 37.4947   1
  -1  -9  -5 187.275 43.4563   2
   1  -9   5 225.921 51.1507   2
  -2  -9  -5 90.1455 39.3130   2
   2  -9   5 94.0965 45.9815   2
  -3  -9  -5 -21.351 32.7567   2
   3  -9   5 15.5729 40.3967   2
  -4  -9  -5 -37.203 33.7373   2
   4  -9   5 52.4538 39.1411   2
  -5  -9  -5 65.5146 35.0969   2
   5  -9   5 36.2526 39.1811   2
  -5  -9  -5 12.5033 32.6492   3
 -16   0   6 28.5798 35.3541   3
 -15   0   6 45.2429 34.7824   3
 -14   0   6 -14.185 29.4913   3
  14   0  -6 -13.013 28.3449   1
  13   0  -6 45.9493 27.8050   1
 -13   0   6 21.7005 28.6821   3
 -12   0   6 -38.794 24.3403   3
  12   0  -6 25.6026 27.4552   1
 -11   0   6 13.2223 23.6292   3
  11   0  -6 4.69720 24.4566   1
  10   0  -6 -20.152 20.1180   1
 -10   0   6 39.4360 21.9496   3
  -9   0   6 24.5978 20.0017   3
  -9   0   6 57.1096 21.2533   2
   9   0  -6 21.2920 19.9717   1
   8   0  -6 1583.11 96.3837   1
  -8   0   6 1704.56 97.8690   2
  -8   0   6 1690.47 97.2127   3
  -7   0   6 53.6928 21.9038   2
   7   0  -6 7.09560 17.1259   1
  -7   0   6 39.7621 16.8797   3
   6   0  -6 319.285 29.1126   1
  -6   0   6 353.590 32.7889   2
  -6   0   6 301.103 26.9725   3
  -5   0   6 158.464 27.4356   2
  -5   0   6 141.707 19.3469   3
   5   0  -6 149.248 19.2988   1
  -4   0   6 50.7165 27.1943   2
   4   0  -6 100.589 32.4585   2
   4   0  -6 103.565 16.1556   1
  -4   0   6 98.3738 17.2883   1
  -3   0   6 17.2916 13.2453   1
  -3   0   6 -3.5692 28.6550   2
   3   0  -6 -0.3532 13.8915   1
   3   0  -6 46.2330 32.1862   2
  -2   0   6 337.235 25.9056   3
  -2   0   6 323.162 26.6421   1
   2   0  -6 436.335 42.8441   2
   2   0  -6 360.449 26.5580   1
  -2   0   6 313.422 39.1721   2
   1   0  -6 70.0347 14.5571   1
   1   0  -6 80.4738 27.5553   2
   1   0  -6 86.6293 14.0401   3
  -1   0   6 93.6138 13.5565   1
  -1   0   6 60.2823 29.6204   2
  -1   0   6 82.7972 13.6135   3
   0   0  -6 9.86720 12.6010   1
   0   0  -6 25.7731 13.9923   3
   0   0   6 -3.1467 13.0233   3
   0   0  -6 26.6015 28.3975   2
   0   0   6 -3.8932 30.2625   2
  -1   0  -6 -0.0487 21.2254   2
   1   0   6 -4.1373 14.6639   3
  -1   0  -6 8.28142 14.5204   3
   1   0   6 21.4529 25.8543   2
  -2   0  -6 465.067 41.6181   2
   2   0   6 515.689 47.0762   2
  -2   0  -6 537.457 39.9964   3
   2   0   6 602.468 40.2041   3
  -3   0  -6 1886.99 104.496   2
  -3   0  -6 1843.58 106.837   3
   3   0   6 2007.89 108.536   2
  -4   0  -6 85.9863 13.9554   2
   4   0   6 81.1146 19.4379   2
  -4   0  -6 75.0893 19.5532   3
  -5   0  -6 812.328 45.7870   2
   5   0   6 797.113 47.7753   2
  -5   0  -6 758.778 55.2742   3
  -6   0  -6 71.9884 21.1093   3
  -7   0  -6 160.679 26.8161   3
  -8   0  -6 11.9546 21.9887   3
  -9   0  -6 11.7931 24.0502   3
 -10   0  -6 76.5313 30.0204   3
 -11   0  -6 7.87076 28.1536   3
 -12   0  -6 -1.2629 30.9810   3
 -13   0  -6 25.6634 34.7081   3
 -14   0  -6 57.1176 38.7314   3
 -15  -1   6 81.1999 36.1873   3
  15  -1  -6 60.5750 28.7742   1
 -15   1   6 -6.3228 32.3261   3
  14  -1  -6 77.9192 31.9804   1
 -14  -1   6 83.8414 35.5682   3
 -14   1   6 55.7808 33.5516   3
 -13  -1   6 12.6816 29.3038   3
  13  -1  -6 -26.465 27.8275   1
 -13   1   6 33.6123 29.3378   3
  12  -1  -6 20.5168 25.9650   1
 -12  -1   6 34.9447 28.2099   3
 -12   1   6 43.3716 27.0733   3
  12   1  -6 20.3657 26.2475   1
 -11  -1   6 101.658 28.2309   3
  11  -1  -6 99.0632 29.1660   1
 -11  -1   6 155.684 25.6128   2
 -11   1   6 123.619 26.8678   3
  11   1  -6 73.7338 27.4852   1
 -10  -1   6 44.9401 22.9755   2
  10  -1  -6 18.5777 24.3414   1
 -10  -1   6 46.6000 24.1479   3
 -10   1   6 54.0978 22.3043   3
  10   1  -6 45.2301 22.7016   1
  -9  -1   6 -5.6874 19.3583   3
   9  -1  -6 -22.892 21.3066   1
  -9  -1   6 23.2344 22.4269   2
   9   1  -6 -30.630 19.3472   1
  -9   1   6 -1.5428 19.3556   3
  -8  -1   6 80.2154 22.0153   3
  -8  -1   6 91.3006 25.9694   2
   8  -1  -6 58.6061 19.5760   1
  -8   1   6 57.5487 19.2564   3
   8   1  -6 56.4762 18.6791   1
   7  -1  -6 229.951 26.8387   1
  -7  -1   6 183.092 32.5186   2
  -7  -1   6 178.310 25.2119   3
   7   1  -6 176.424 21.9179   1
  -7   1   6 184.495 21.8561   3
   6  -1  -6 19.8234 18.2840   1
  -6  -1   6 43.6231 18.7979   3
  -6  -1   6 19.9124 30.3808   2
  -6   1   6 35.8418 14.2856   3
   6   1  -6 7.72010 14.9314   1
   5  -1  -6 428.362 35.5669   1
  -5  -1   6 355.734 44.3889   2
  -5  -1   6 421.791 32.4942   1
  -5   1   6 415.881 36.9964   2
   5   1  -6 359.560 30.4791   1
  -5   1   6 408.959 30.0436   3
   4  -1  -6 2022.08 109.393   1
  -4  -1   6 2017.48 117.099   2
  -4  -1   6 1958.68 106.512   1
  -4   1   6 1899.95 105.091   3
   4   1  -6 1866.24 106.331   1
  -4   1   6 2105.45 111.863   2
  -3  -1   6 4405.71 228.677   1
   3  -1  -6 4272.78 230.609   1
  -3  -1   6 3924.06 234.693   2
   3  -1  -6 4435.88 233.668   2
   3   1  -6 4248.27 228.668   1
  -3   1   6 4586.60 231.060   1
   3   1  -6 4716.20 235.840   2
  -3   1   6 4450.26 233.674   2
  -3   1   6 4289.85 227.258   3
  -2  -1   6 4018.54 233.144   2
  -2  -1   6 4223.00 227.232   1
   2  -1  -6 4461.51 232.431   2
   2  -1  -6 4476.83 230.110   1
   2   1  -6 4559.11 233.634   2
  -2   1   6 4542.80 232.773   2
   2   1  -6 4284.37 227.344   1
  -2   1   6 4285.12 229.400   1
   1  -1  -6 529.259 42.8311   2
  -1  -1   6 577.357 33.8135   1
  -1  -1   6 549.471 44.3342   2
   1  -1  -6 562.469 39.6410   1
   1  -1  -6 617.081 33.1522   3
  -1  -1   6 593.452 39.1896   3
  -1   1   6 559.842 33.3734   3
  -1   1   6 499.448 43.5886   2
   1   1  -6 590.619 46.3938   2
   1   1  -6 545.404 34.3775   1
  -1   1   6 538.662 38.5734   1
   0  -1   6 42.3901 15.9915   3
   0  -1  -6 36.5575 10.9243   3
   0  -1   6 40.6580 19.2694   2
   0  -1  -6 59.4024 19.2029   2
   0  -1  -6 34.6114 15.6791   1
   0   1   6 13.1117 20.1795   2
   0   1  -6 26.1448 10.2372   1
   0   1   6 14.7197 11.2763   3
   0   1  -6 24.7318 20.1272   2
   0   1   6 19.1795 13.4165   1
   0   1  -6 42.5149 16.4815   3
   1  -1   6 2.29215 15.9809   3
  -1  -1  -6 -0.8013 15.4437   1
  -1  -1  -6 16.2178 12.2885   3
  -1  -1  -6 44.9863 17.6667   2
   1  -1   6 -1.9737 18.5253   2
  -1   1  -6 -7.5009 16.5036   3
   1   1   6 38.0849 13.6942   3
   1   1   6 10.6503 18.3738   2
  -1   1  -6 1.91189 18.3867   2
  -2  -1  -6 415.601 31.7373   3
  -2  -1  -6 349.134 30.8423   2
   2  -1   6 379.396 34.6403   2
  -2   1  -6 372.621 32.2162   3
  -2   1  -6 442.052 33.7836   2
   2   1   6 438.406 33.7849   3
  -3  -1  -6 84.3213 17.3051   3
  -3  -1  -6 97.2889 18.9550   2
   3  -1   6 86.6407 17.3876   2
  -3   1  -6 72.6700 19.1149   3
  -3   1  -6 72.8421 15.5421   2
   4  -1   6 89.9166 16.6655   2
  -4  -1  -6 66.0808 19.3630   2
  -4  -1  -6 74.8075 18.4055   3
  -4   1  -6 113.621 15.6894   2
  -4   1  -6 56.7687 19.9044   3
  -5  -1  -6 -3.6210 17.1523   3
  -5  -1  -6 -0.1023 13.4472   2
   5  -1   6 22.4004 13.5554   2
  -5   1  -6 21.7056 11.6167   2
  -5   1  -6 14.0206 19.1264   3
   6  -1   6 136.644 17.7061   2
  -6  -1  -6 122.519 22.9313   3
  -6   1  -6 63.9576 22.5510   3
  -6   1  -6 113.467 13.7594   2
   7  -1   6 4.60226 13.9726   2
  -7  -1  -6 -13.463 20.2581   3
  -7   1  -6 -21.649 20.4264   3
  -8  -1  -6 170.423 30.0682   3
  -8   1  -6 153.924 29.7310   3
  -9  -1  -6 348.275 40.2311   3
  -9   1  -6 328.394 39.8591   3
 -10  -1  -6 315.373 41.6724   3
 -10   1  -6 277.613 39.8313   3
 -11  -1  -6 354.799 43.4930   3
 -11   1  -6 255.111 41.7147   3
 -12  -1  -6 335.111 46.0899   3
 -12   1  -6 275.006 44.4589   3
 -13  -1  -6 43.7719 36.1916   3
 -13   1  -6 -2.7240 34.9452   3
 -14  -1  -6 41.0425 39.7728   3
 -14   1  -6 -39.969 35.6325   3
 -15  -2   6 -62.741 32.0251   3
  15  -2  -6 15.5474 33.0483   1
 -15   2   6 79.7345 37.3904   3
 -14  -2   6 -42.408 31.3019   3
  14  -2  -6 86.6056 34.6387   1
 -14   2   6 83.6700 34.9925   3
 -13  -2   6 -5.8455 30.0062   3
  13  -2  -6 53.5581 29.5310   1
 -13   2   6 2.23858 30.1645   3
  12  -2  -6 1.36194 22.5102   1
 -12  -2   6 -43.937 26.3861   3
 -12   2   6 -18.492 27.2288   3
  11  -2  -6 305.202 40.1199   1
 -11  -2   6 377.060 43.2689   3
 -11  -2   6 307.750 36.7481   2
 -11   2   6 339.026 38.6670   3
  10  -2  -6 1216.77 82.4581   1
 -10  -2   6 1291.68 88.0567   3
 -10  -2   6 1300.38 86.3043   2
 -10   2   6 1249.18 82.4719   3
  -9  -2   6 669.405 50.5249   3
  -9  -2   6 522.638 52.7458   2
   9  -2  -6 580.011 48.9763   1
  -9   2   6 586.426 49.4501   3
   9   2  -6 517.024 46.0501   1
  -8  -2   6 104.889 36.4979   2
  -8  -2   6 110.972 25.8536   3
   8  -2  -6 117.872 24.5302   1
   8   2  -6 96.8937 21.1102   1
  -8   2   6 135.789 23.0077   3
  -7  -2   6 23.8558 29.1193   2
  -7  -2   6 7.84869 20.2631   3
   7  -2  -6 68.1120 22.1666   1
  -7   2   6 27.0129 17.7035   3
   7   2  -6 55.3592 16.2576   1
  -6  -2   6 35.8199 26.1632   2
   6  -2  -6 31.3470 13.2015   3
   6  -2  -6 88.1743 22.0238   1
   6   2  -6 46.4534 14.4907   1
  -6   2   6 53.9466 15.8272   3
   5  -2  -6 8.01476 18.6522   1
  -5  -2   6 33.6132 21.3484   2
   5  -2  -6 7.37406 10.8464   3
  -5  -2   6 -23.010 12.0386   1
  -5   2   6 12.0971 12.6085   3
   5   2  -6 8.26971 12.2276   1
   4  -2  -6 355.080 23.1696   3
  -4  -2   6 402.332 35.9526   2
   4  -2  -6 313.516 28.6257   1
  -4  -2   6 310.973 25.2684   1
  -4   2   6 327.933 24.1090   3
   4   2  -6 315.141 25.1408   1
  -3  -2   6 6.29759 20.3933   2
   3  -2  -6 7.53729 14.9366   1
  -3  -2   6 10.3154 8.81875   1
   3   2  -6 -4.6961 8.40088   1
   2  -2  -6 16.6783 16.8073   1
  -2  -2   6 19.7116 16.9725   2
  -2  -2   6 3.79433 6.58284   1
   2   2  -6 12.8248 6.96097   1
   1  -2  -6 97.9317 18.6854   1
  -1  -2   6 85.1042 20.4588   2
   0  -2  -6 158.366 21.6864   1
   0  -2  -6 170.146 15.2124   3
   0  -2   6 152.969 22.9707   2
   0  -2  -6 208.718 23.4920   2
   0   2  -6 162.380 22.4660   3
   0   2  -6 162.042 12.2480   1
  -1  -2  -6 342.682 28.1324   3
  -1  -2  -6 400.944 32.0558   2
  -1  -2  -6 423.725 34.7233   1
   1  -2   6 313.809 29.7740   2
  -1   2  -6 324.294 30.8398   3
  -1   2  -6 380.868 24.2238   1
   2  -2   6 456.537 35.1582   2
  -2  -2  -6 396.880 32.0396   3
  -2  -2  -6 426.374 32.5032   2
  -2  -2  -6 458.175 35.1704   1
  -2   2  -6 410.600 35.2008   3
  -2   2  -6 425.573 28.6716   1
  -2   2  -6 431.509 34.2630   2
   2   2   6 342.546 29.4792   3
  -3  -2  -6 731.600 48.7984   3
  -3  -2  -6 782.221 47.3524   2
   3  -2   6 703.842 49.5639   2
  -3   2  -6 733.407 45.0789   1
  -3   2  -6 754.968 54.3797   3
  -3   2  -6 735.773 48.7311   2
   4  -2   6 2209.42 121.593   2
  -4  -2  -6 2171.25 119.119   2
  -4  -2  -6 2125.88 122.212   3
  -4   2  -6 2220.78 120.832   2
  -4   2  -6 2271.41 125.428   3
  -5  -2  -6 2574.18 146.660   3
  -5  -2  -6 2668.55 141.508   2
   5  -2   6 2683.13 143.867   2
  -5   2  -6 2528.77 148.078   3
  -5   2  -6 2709.83 143.086   2
  -6  -2  -6 154.661 16.6299   2
  -6  -2  -6 130.270 25.4337   3
   6  -2   6 83.2836 18.6472   2
  -6   2  -6 91.4403 24.2168   3
  -7  -2  -6 121.193 26.8575   3
  -7  -2  -6 70.1363 15.7834   2
   7  -2   6 108.201 17.5543   2
  -7   2  -6 55.7565 25.2181   3
  -8  -2  -6 64.2278 26.1235   3
   8  -2   6 66.0498 15.8483   2
  -8   2  -6 85.3742 27.4101   3
  -9  -2  -6 50.3701 28.1959   3
  -9   2  -6 22.4342 27.7540   3
 -10  -2  -6 18.4938 29.2944   3
 -10   2  -6 14.8913 29.0579   3
 -11  -2  -6 28.9225 33.1114   3
 -11   2  -6 2.79429 31.7836   3
 -12  -2  -6 53.1773 37.4581   3
 -12   2  -6 -4.1760 33.8983   3
 -13  -2  -6 -48.975 36.1190   3
 -13   2  -6 32.5353 36.2229   3
 -14  -2  -6 54.0714 48.2573   3
 -14   2  -6 -26.218 37.0967   3
 -15  -3   6 99.5724 41.1719   3
 -14  -3   6 16.7498 35.3123   3
  14  -3  -6 68.9794 32.2368   1
  13  -3  -6 56.7468 33.9877   1
 -13  -3   6 70.3811 37.0614   3
 -13   3   6 113.657 35.5925   3
  12  -3  -6 -17.216 24.3776   1
 -12  -3   6 -16.969 29.6126   3
 -12   3   6 25.6105 30.1492   3
  11  -3  -6 22.2069 29.0904   1
 -11  -3   6 5.24988 33.5148   2
 -11  -3   6 42.8229 31.3061   3
 -11   3   6 23.7122 27.8213   3
 -10  -3   6 -22.146 34.8724   2
  10  -3  -6 -48.986 24.6012   1
 -10  -3   6 24.7864 28.6840   3
 -10   3   6 9.64717 24.8334   3
  -9  -3   6 -21.708 29.2521   2
   9  -3  -6 9.86639 22.6810   1
  -9  -3   6 16.6969 25.7295   3
  -9   3   6 -11.126 22.2941   3
  -8  -3   6 6.90515 27.3879   2
  -8  -3   6 -18.339 22.9493   3
   8  -3  -6 45.4956 23.1794   1
  -8   3   6 -0.2850 20.5328   3
   7  -3  -6 56.2239 21.1277   1
  -7  -3   6 85.3554 25.9536   2
  -7   3   6 62.9487 19.3545   3
  -6  -3   6 -8.5238 22.1801   2
   6  -3  -6 14.4469 12.3896   3
   6  -3  -6 14.0626 18.4297   1
  -6   3   6 -10.467 14.3081   3
  -5  -3   6 148.178 25.0614   2
   5  -3  -6 92.2667 13.6969   3
  -5  -3   6 122.869 15.0805   1
   5  -3  -6 119.603 23.9418   1
  -5   3   6 118.228 14.7530   3
   4  -3  -6 407.855 26.7238   3
  -4  -3   6 454.260 37.5868   2
   4  -3  -6 441.989 35.4799   1
  -4  -3   6 368.300 27.1194   1
  -4   3   6 416.575 26.6469   3
  -3  -3   6 196.372 25.0947   2
   3  -3  -6 212.299 24.5179   1
  -3  -3   6 164.624 13.3439   1
   2  -3  -6 39.6348 17.6587   1
  -2  -3   6 59.5828 21.6857   2
   1  -3  -6 839.658 51.8751   1
  -1  -3   6 738.605 55.5410   2
   1  -3  -6 786.688 44.8578   3
   0  -3   6 468.331 40.7116   2
   0  -3  -6 423.636 29.9768   3
   0  -3  -6 404.054 34.2731   1
  -1  -3  -6 126.115 17.5613   3
   1  -3   6 156.432 24.8284   2
  -1  -3  -6 188.634 24.3342   1
  -1   3  -6 130.432 23.2367   3
  -1   3  -6 162.877 12.9466   1
  -1   3  -6 164.089 12.9455   1
   2  -3   6 27.3835 20.0730   2
  -2  -3  -6 29.9723 15.7298   3
  -2  -3  -6 46.9163 20.1596   1
  -2   3  -6 32.6950 10.6891   1
  -2   3  -6 39.3137 19.4389   3
   3  -3   6 -20.634 17.7198   2
  -3  -3  -6 40.0512 16.9335   3
  -3   3  -6 14.6714 19.8881   3
  -3   3  -6 3.89244 12.2881   1
  -4  -3  -6 27.8483 17.6739   3
   4  -3   6 15.8655 17.8489   2
  -4   3  -6 -20.018 20.7047   3
   5  -3   6 45.5167 19.9047   2
  -5  -3  -6 53.2526 21.2263   3
  -5   3  -6 38.2362 23.8789   3
  -6  -3  -6 219.761 22.8740   2
   6  -3   6 239.433 27.8982   2
  -6  -3  -6 254.872 31.8940   3
  -6   3  -6 219.474 33.0662   3
  -7  -3  -6 27.3589 14.1382   2
   7  -3   6 17.4322 19.4378   2
  -7  -3  -6 67.4398 25.9011   3
  -7   3  -6 20.3239 26.1997   3
  -8  -3  -6 14.8725 26.3984   3
   8  -3   6 7.57972 17.5826   2
  -8   3  -6 -41.286 25.5934   3
  -9  -3  -6 155.609 35.2272   3
  -9   3  -6 59.5860 31.8265   3
 -10  -3  -6 740.341 65.1046   3
 -10   3  -6 657.676 62.2867   3
 -11  -3  -6 88.9499 35.7254   3
 -11   3  -6 53.2008 35.0209   3
 -12  -3  -6 19.7280 37.3852   3
 -12   3  -6 17.6478 35.2598   3
 -13  -3  -6 -15.149 39.8743   3
 -13   3  -6 -64.192 33.9468   3
  14  -4  -6 0.33049 32.8465   1
 -14  -4   6 23.4287 37.1698   3
  13  -4  -6 -13.923 32.8465   1
 -13  -4   6 -32.694 32.9915   3
 -12  -4   6 93.0151 37.5360   3
  12  -4  -6 19.9440 33.1222   1
 -11  -4   6 223.233 41.5178   3
 -11  -4   6 241.047 46.5598   2
  11  -4  -6 255.062 37.8327   1
 -11   4   6 335.340 41.8761   3
 -10  -4   6 503.275 52.8288   3
 -10  -4   6 534.073 54.1768   2
  10  -4  -6 521.700 48.8600   1
 -10   4   6 513.685 47.3263   3
   9  -4  -6 491.842 46.3323   1
  -9  -4   6 503.842 50.5833   3
  -9  -4   6 455.335 48.1910   2
  -9   4   6 494.842 43.4754   3
  -8  -4   6 339.967 40.6288   2
  -8  -4   6 402.041 43.1671   3
   8  -4  -6 357.220 38.0750   1
  -8   4   6 345.299 32.7794   3
   7  -4  -6 46.7726 24.7308   1
  -7  -4   6 38.5118 23.3898   2
  -7   4   6 53.6521 16.9821   3
  -6  -4   6 -4.7345 22.4650   2
   6  -4  -6 3.31677 13.5179   3
   6  -4  -6 9.07240 21.7543   1
  -6   4   6 4.60802 12.6992   3
  -5  -4   6 106.039 25.7284   2
   5  -4  -6 128.928 15.2189   3
   5  -4  -6 99.4981 23.6572   1
  -5  -4   6 101.528 14.1770   1
  -5   4   6 79.1623 14.0012   3
   4  -4  -6 159.283 15.8628   3
  -4  -4   6 149.486 13.9016   1
   4  -4  -6 195.434 24.4714   1
  -4  -4   6 103.028 25.7320   2
  -3  -4   6 6.20002 6.98175   1
   3  -4  -6 -10.506 17.4505   1
   3  -4  -6 9.36636 10.5304   3
  -3  -4   6 -2.1971 22.1719   2
  -3  -4   6 -6.6375 6.03935   1
  -2  -4   6 -15.612 21.6602   2
   2  -4  -6 21.9087 18.5883   1
   2  -4  -6 -4.0028 10.2739   3
   1  -4  -6 -7.3003 18.9104   1
  -1  -4   6 -0.5299 21.0952   2
   0  -4  -6 135.253 22.8309   1
   0  -4   6 242.991 30.9686   2
   0  -4  -6 175.911 18.7979   3
  -1  -4  -6 163.238 19.3422   3
  -1  -4  -6 143.676 23.3655   1
   1  -4   6 147.628 26.6884   2
  -1   4  -6 108.141 12.1701   1
  -2  -4  -6 345.705 34.7764   1
  -2  -4  -6 342.020 31.2976   3
   2  -4   6 430.542 38.8350   2
  -2   4  -6 474.439 27.8120   1
  -2   4  -6 415.603 38.0998   3
  -3  -4  -6 1098.14 68.2183   3
  -3  -4  -6 1155.00 72.0151   1
   3  -4   6 1106.89 72.1379   2
  -3   4  -6 1084.95 62.5883   1
  -3   4  -6 992.595 74.0862   3
  -4  -4  -6 1545.45 89.3180   1
   4  -4   6 1437.37 88.1024   2
  -4  -4  -6 1367.91 86.5485   3
  -4   4  -6 1386.02 91.2156   3
   5  -4   6 804.239 59.5073   2
  -5  -4  -6 830.060 61.2694   3
  -5   4  -6 803.440 65.4233   3
  -6  -4  -6 225.430 32.5169   3
  -6  -4  -6 170.669 25.3830   2
   6  -4   6 183.932 29.1246   2
  -6   4  -6 190.964 34.0506   3
   7  -4   6 49.2908 22.8031   2
  -7  -4  -6 -9.2899 16.8076   2
  -7  -4  -6 10.0869 26.7762   3
  -7   4  -6 11.6899 28.4268   3
   8  -4   6 51.5669 22.6504   2
  -8  -4  -6 46.9789 30.0719   3
  -8   4  -6 -9.3863 29.6364   3
   9  -4   6 159.202 34.7158   2
  -9  -4  -6 98.0877 35.4182   3
  -9   4  -6 89.9813 35.4935   3
 -10  -4  -6 -20.777 32.0204   3
 -10   4  -6 22.8768 34.5827   3
 -11  -4  -6 85.6195 39.6529   3
 -11   4  -6 20.9823 36.3483   3
 -12  -4  -6 -33.610 38.7853   3
 -12   4  -6 45.0112 40.0623   3
 -13  -4  -6 23.4668 43.9213   3
 -13   4  -6 -17.662 39.6701   3
  13  -5  -6 29.5166 32.3641   1
 -13  -5   6 59.3718 39.3031   3
 -12  -5   6 40.1127 37.0677   3
  12  -5  -6 16.1398 29.4627   1
 -11  -5   6 53.1850 38.1535   3
  11  -5  -6 10.1083 28.6614   1
 -10  -5   6 115.524 38.5706   3
 -10  -5   6 3.05350 30.1692   2
  10  -5  -6 16.3537 28.7879   1
  -9  -5   6 13.5349 27.0279   2
  -9  -5   6 8.38338 32.5600   3
   9  -5  -6 11.6438 25.1561   1
  -8  -5   6 14.6767 31.1250   3
   8  -5  -6 -5.0920 24.1782   1
  -8  -5   6 62.8551 27.5197   2
  -8   5   6 1.64501 16.7414   3
   7  -5  -6 7.24915 23.8042   1
  -7  -5   6 28.5135 25.6015   2
  -7   5   6 31.2708 15.7989   3
  -6  -5   6 -14.857 24.0439   2
   6  -5  -6 -17.866 21.8255   1
   5  -5  -6 58.1001 23.8236   1
   5  -5  -6 27.5942 17.0032   3
  -5  -5   6 4.39635 25.5824   2
   4  -5  -6 223.720 29.0187   1
  -4  -5   6 227.999 33.6594   2
  -4  -5   6 209.965 17.0541   1
  -4  -5   6 244.012 18.3908   1
   4  -5  -6 222.251 21.2049   3
   3  -5  -6 1454.07 88.0544   1
   3  -5  -6 1442.14 81.5467   3
  -3  -5   6 1441.83 93.3293   2
   2  -5  -6 1132.47 68.3223   3
  -2  -5   6 1241.79 80.8671   2
   2  -5  -6 1193.67 75.1278   1
   1  -5  -6 25.3875 20.5358   1
   1  -5  -6 17.4876 13.6223   3
  -1  -5   6 33.2609 23.9840   2
   0  -5  -6 154.635 26.6249   1
   0  -5   6 173.558 32.2828   2
   1  -5   6 18.8955 26.1079   2
  -1  -5  -6 50.3771 17.8943   3
  -1  -5  -6 81.1633 22.2724   1
  -1   5  -6 53.3348 10.2789   1
  -2  -5  -6 34.3180 18.9486   3
   2  -5   6 -4.4303 24.9993   2
  -2  -5  -6 -9.1416 20.2909   1
   2  -5   6 16.3313 10.7359   1
  -2   5  -6 2.90681 11.6069   1
  -3  -5  -6 46.9613 21.1267   3
  -3  -5  -6 -16.438 19.8072   1
   3  -5   6 0.77244 12.3483   1
   3  -5   6 4.98013 24.5849   2
  -3   5  -6 -10.703 13.2542   1
  -3   5  -6 -13.879 23.4561   3
  -4  -5  -6 -41.715 21.5396   2
  -4  -5  -6 4.27898 21.6393   3
  -4  -5  -6 -6.0360 21.4805   1
   4  -5   6 13.2305 14.2844   1
   4  -5   6 20.8944 25.5379   2
  -4   5  -6 33.3005 26.3598   3
  -5  -5  -6 26.6399 23.0851   2
  -5  -5  -6 -44.294 22.2464   1
  -5  -5  -6 -11.323 21.8315   3
   5  -5   6 -6.2447 22.9579   2
  -5   5  -6 -11.737 26.0276   3
   6  -5   6 -6.2202 24.4098   2
  -6  -5  -6 -23.233 25.2400   3
  -6  -5  -6 68.7672 23.7382   2
  -6   5  -6 1.48056 27.4040   3
   7  -5   6 2.21965 23.2573   2
  -7  -5  -6 30.8327 29.3374   3
  -7  -5  -6 -5.5388 21.2729   2
  -7   5  -6 7.03707 30.2418   3
   8  -5   6 101.906 27.5172   2
  -8  -5  -6 112.607 34.5742   3
  -8   5  -6 111.496 37.4350   3
  -9  -5  -6 111.738 37.3353   3
   9  -5   6 114.095 31.2298   2
  -9   5  -6 51.5629 38.0619   3
 -10  -5  -6 52.1854 37.2958   3
 -10   5  -6 -33.913 34.9796   3
 -11  -5  -6 20.9032 38.6030   3
 -11   5  -6 94.8689 43.1386   3
 -12  -5  -6 178.651 48.4684   3
 -12   5  -6 125.586 47.7831   3
  12  -6  -6 -17.407 29.9727   1
 -12  -6   6 27.9164 41.7309   3
  11  -6  -6 -3.5888 29.0226   1
 -11  -6   6 -30.324 39.4193   3
 -10  -6   6 -34.476 38.8152   3
 -10  -6   6 16.7605 31.7546   2
  10  -6  -6 6.75745 29.1134   1
  -9  -6   6 -8.8144 28.1602   2
  -9  -6   6 26.7341 39.0325   3
   9  -6  -6 22.1170 27.0625   1
   8  -6  -6 247.182 35.7354   1
  -8  -6   6 239.493 36.5376   2
  -7  -6   6 -10.921 26.0830   2
   7  -6  -6 1.72173 24.9316   1
  -6  -6   6 39.9526 30.3690   2
   6  -6  -6 59.0116 26.4511   1
   5  -6  -6 30.3683 23.9209   1
  -5  -6   6 7.75077 25.7854   2
   4  -6  -6 2.08095 23.1018   1
  -4  -6   6 23.6711 28.6579   2
  -3  -6   6 74.2401 30.6627   2
   3  -6  -6 -1.0536 21.9454   1
  -2  -6   6 86.9036 28.9464   2
   2  -6  -6 78.1137 24.7216   1
   1  -6  -6 73.8792 24.0483   1
  -1  -6   6 -2.2813 27.6312   2
   0  -6   6 -6.2659 27.3516   2
   0  -6  -6 14.5822 23.4590   1
  -1  -6  -6 21.8297 20.1847   3
   1  -6   6 36.3546 28.8487   2
  -1  -6  -6 73.5862 24.4354   1
  -2  -6  -6 60.1718 22.1304   3
  -2  -6  -6 34.0080 23.8676   1
   2  -6   6 83.0646 30.3246   2
   2  -6   6 97.0063 13.8086   1
   3  -6   6 264.135 22.4304   1
   3  -6   6 257.326 38.2363   2
  -3  -6  -6 190.654 31.1025   1
  -4  -6  -6 12.7581 21.9428   3
   4  -6   6 2.91080 27.9041   2
   4  -6   6 13.8001 15.0161   1
  -4  -6  -6 -38.048 23.9977   2
  -4  -6  -6 -3.9151 23.2489   1
  -4   6  -6 26.4882 28.2786   3
   5  -6   6 56.3224 29.8778   2
  -5  -6  -6 86.7651 27.4396   1
  -5  -6  -6 101.023 26.6071   3
  -5  -6  -6 70.0443 27.5617   2
   5  -6   6 84.8516 18.7267   1
  -5   6  -6 40.2310 30.1505   3
  -6  -6  -6 26.3297 27.0272   3
   6  -6   6 2.65411 17.9601   1
  -6  -6  -6 4.13506 24.5171   2
  -6  -6  -6 45.0691 25.7921   1
   6  -6   6 -12.521 27.4695   2
  -6   6  -6 19.6636 31.1711   3
  -7  -6  -6 16.2862 25.1233   2
  -7  -6  -6 9.89851 26.6138   1
   7  -6   6 22.9311 29.0147   2
  -7  -6  -6 12.7200 29.7905   3
  -7   6  -6 79.8328 35.0445   3
  -8  -6  -6 21.4990 26.2469   1
   8  -6   6 14.0805 28.3763   2
  -8  -6  -6 -49.610 30.3017   3
  -8   6  -6 80.6464 37.9138   3
   9  -6   6 18.2467 37.0668   2
  -9  -6  -6 55.4990 37.0269   3
  -9   6  -6 51.6671 39.2604   3
 -10  -6  -6 45.8915 39.5028   3
 -10   6  -6 97.8389 43.6979   3
 -11  -6  -6 -4.2746 39.9101   3
 -11   6  -6 -60.654 39.9889   3
  11  -7  -6 -39.532 29.0681   1
  11  -7  -6 120.510 39.2429   2
  10  -7  -6 -34.852 28.2182   1
 -10  -7   6 -14.169 40.0527   3
 -10  -7   6 -23.979 30.8891   2
   9  -7  -6 4.27347 27.3570   1
  -9  -7   6 -12.536 27.5460   2
  -9  -7   6 -3.6979 38.8710   3
  -8  -7   6 38.5070 30.7761   2
   8  -7  -6 51.1691 29.6239   1
  -7  -7   6 -10.441 28.7419   2
   7  -7  -6 -15.593 27.1971   1
  -6  -7   6 27.5106 31.6503   2
   6  -7  -6 -49.623 24.0894   1
  -5  -7   6 136.137 37.4432   2
   5  -7  -6 150.553 31.1509   1
  -4  -7   6 352.819 48.3625   2
   4  -7  -6 350.387 40.1583   1
  -3  -7   6 213.277 39.4559   2
   3  -7  -6 261.805 34.1819   1
   2  -7  -6 308.590 35.1851   1
  -2  -7   6 261.421 41.2332   2
  -1  -7   6 219.055 39.6970   2
   1  -7  -6 170.403 31.8509   1
   0  -7  -6 68.0628 26.4393   1
   0  -7   6 35.7850 30.0021   2
  -1  -7  -6 53.4924 22.6171   3
  -1  -7  -6 -7.8675 29.4151   2
  -1  -7  -6 57.2523 25.5880   1
   1  -7   6 0.02109 30.6775   2
  -2  -7  -6 69.7126 25.4199   3
  -2  -7  -6 56.9364 30.5953   2
   2  -7   6 125.855 37.3535   2
  -2  -7  -6 111.945 30.9432   1
  -3  -7  -6 -17.197 22.5886   1
  -3  -7  -6 6.48836 27.6007   2
  -3  -7  -6 22.0713 25.0661   3
   3  -7   6 -6.2782 31.6493   2
  -4  -7  -6 32.2829 25.1115   1
  -4  -7  -6 18.0489 25.7960   3
  -4  -7  -6 -1.7484 26.8037   2
   4  -7   6 35.7391 31.8264   2
   5  -7   6 16.8716 30.1278   2
  -5  -7  -6 -15.788 26.0951   2
  -5  -7  -6 -29.682 24.9846   3
  -5  -7  -6 29.4407 26.7932   1
  -6  -7  -6 -11.386 24.1118   1
   6  -7   6 -6.1359 30.4055   2
  -6  -7  -6 32.6053 28.6587   3
  -6  -7  -6 -31.225 25.9357   2
  -6   7  -6 -40.069 32.1884   3
  -7  -7  -6 -22.754 27.1538   2
   7  -7   6 2.25834 32.6737   2
  -7  -7  -6 -29.208 24.6820   1
  -7  -7  -6 6.97757 31.1197   3
  -7   7  -6 -7.2069 36.1713   3
  -8  -7  -6 -7.4218 32.9244   3
  -8  -7  -6 11.1580 28.2846   1
   8  -7   6 -6.8702 31.7512   2
  -8   7  -6 20.3954 37.2015   3
  -9  -7  -6 33.8777 29.5072   1
  -9  -7  -6 19.6683 39.0020   3
  -9   7  -6 28.2435 42.0794   3
   9  -8  -6 97.3756 40.6515   2
   9  -8  -6 41.6343 30.0874   1
  -9  -8   6 37.6892 33.4832   2
   8  -8  -6 35.3401 28.9740   1
  -8  -8   6 14.4497 30.6873   2
   8  -8  -6 73.5992 41.6740   2
  -7  -8   6 18.2237 33.3747   2
   7  -8  -6 88.9069 40.7013   2
   7  -8  -6 -17.276 29.4642   1
   6  -8  -6 75.7706 39.3891   2
  -6  -8   6 35.1147 33.3607   2
   6  -8  -6 -10.610 29.6386   1
   5  -8  -6 25.5604 36.6573   2
  -5  -8   6 5.63305 32.5746   2
   5  -8  -6 1.74583 27.4831   1
   4  -8  -6 -19.095 30.8622   2
   4  -8  -6 45.0880 28.4703   1
  -4  -8   6 25.4730 36.4596   2
   3  -8  -6 -3.1965 30.8716   2
   3  -8  -6 6.84734 27.1445   1
  -3  -8   6 -14.266 33.8458   2
   2  -8  -6 59.1554 36.1909   2
   2  -8  -6 17.5805 26.0405   1
  -2  -8   6 37.2446 36.0337   2
  -1  -8   6 40.0321 35.8535   2
   1  -8  -6 70.4148 35.6388   2
   1  -8  -6 32.6221 25.9695   1
   0  -8   6 -8.4155 35.9409   2
   0  -8  -6 -11.436 33.7534   2
   0  -8  -6 33.4598 27.2465   1
  -1  -8  -6 -13.542 32.3955   2
   1  -8   6 42.6743 37.8723   2
  -1  -8  -6 19.4446 26.9992   1
  -2  -8  -6 26.1844 28.4290   1
   2  -8   6 75.0678 38.6674   2
  -2  -8  -6 10.7475 25.9732   3
  -2  -8  -6 -9.2282 32.5454   2
  -3  -8  -6 35.7791 29.4031   1
  -3  -8  -6 -14.615 32.9775   2
  -3  -8  -6 3.00459 24.9911   3
   3  -8   6 -22.093 33.4015   2
   4  -8   6 148.775 42.1860   2
  -4  -8  -6 115.029 31.0146   1
  -4  -8  -6 108.695 32.1865   3
  -4  -8  -6 90.7614 35.7046   2
  -5  -8  -6 173.571 37.1105   2
   5  -8   6 215.583 44.3536   2
  -5  -8  -6 60.8266 29.9952   3
  -5  -8  -6 155.057 32.7069   1
  -6  -8  -6 -19.420 24.6700   1
  -6  -8  -6 -9.1697 28.6515   3
   6  -8   6 -65.566 33.3107   2
  -6  -8  -6 -21.288 27.6578   2
  -7  -8  -6 53.0074 31.1656   3
   7  -8   6 43.6005 35.9738   2
  -7  -8  -6 -41.183 26.9198   1
   8  -8   6 -26.394 34.3670   2
  -8   8  -6 -45.527 38.0790   3
  -6  -9   6 -21.308 36.4349   2
   6  -9  -6 -82.538 27.8342   1
   5  -9  -6 1.98422 39.3288   2
  -5  -9   6 0.52524 38.3458   2
   5  -9  -6 -17.683 31.3727   1
   4  -9  -6 -23.602 40.2563   2
  -4  -9   6 -16.524 37.6417   2
   4  -9  -6 18.9947 30.5998   1
  -3  -9   6 -38.051 37.0213   2
   3  -9  -6 72.2540 42.1486   2
   3  -9  -6 5.77776 28.0207   1
   2  -9  -6 7.38207 26.7400   1
   2  -9  -6 20.7213 38.3886   2
  -2  -9   6 40.3770 41.0649   2
   1  -9  -6 53.9547 39.1607   2
   1  -9  -6 -1.7866 27.0469   1
  -1  -9   6 35.2213 40.7808   2
   0  -9   6 5.18579 40.0682   2
   0  -9  -6 39.0199 28.5512   1
   0  -9  -6 26.4704 33.9974   2
  -1  -9  -6 15.1353 28.2856   1
   1  -9   6 45.2951 42.8585   2
  -1  -9  -6 30.8672 37.3550   2
  -2  -9  -6 -14.356 34.2762   2
  -2  -9  -6 -8.4643 29.0616   1
   2  -9   6 73.1836 44.7446   2
   3  -9   6 -9.4676 40.1432   2
  -3  -9  -6 2.88307 32.3977   2
  -3  -9  -6 -37.869 28.7493   1
  -4  -9  -6 45.4602 36.1269   2
  -4  -9  -6 -41.574 30.4046   1
   4  -9   6 48.0385 44.3368   2
   5  -9   6 -17.921 41.3756   2
  -5  -9  -6 44.9015 35.1089   2
  15   0  -7 37.5441 27.8269   1
 -15   0   7 -8.1367 30.5910   3
 -14   0   7 -43.856 29.0497   3
  14   0  -7 -9.8579 29.3942   1
 -13   0   7 -56.572 26.2555   3
  13   0  -7 -13.119 25.4950   1
  12   0  -7 -15.501 23.8976   1
 -12   0   7 -5.9854 25.0190   3
  11   0  -7 9.11823 21.2604   1
 -11   0   7 20.9082 23.2214   3
 -10   0   7 -4.6515 20.4193   3
  10   0  -7 -10.294 20.7748   1
  -9   0   7 -38.016 17.5328   3
  -9   0   7 -22.085 20.3757   2
   9   0  -7 17.2499 21.3766   1
  -8   0   7 -9.9634 21.9377   2
   8   0  -7 -10.204 18.1720   1
  -8   0   7 3.51583 17.3512   3
  -7   0   7 -25.486 15.1971   3
   7   0  -7 -3.3714 17.8830   1
  -7   0   7 -18.773 20.6260   2
   6   0  -7 -7.6679 16.5961   1
  -6   0   7 13.2305 15.6571   3
  -6   0   7 0.16908 22.1855   2
  -5   0   7 9.20189 14.8132   3
   5   0  -7 0.20147 15.4210   1
  -5   0   7 21.6333 25.1326   2
  -4   0   7 -12.766 24.6751   2
  -4   0   7 8.77398 14.8465   1
   4   0  -7 11.0487 15.0927   1
  -3   0   7 -5.6031 13.1201   1
  -3   0   7 -23.761 27.5045   2
   3   0  -7 -35.635 13.3953   1
  -2   0   7 -33.610 27.9979   2
   2   0  -7 -4.9894 13.5052   1
  -2   0   7 2.90561 10.9510   3
   2   0  -7 11.9020 27.4744   2
  -2   0   7 -2.8110 11.5761   1
   1   0  -7 10.0423 12.7837   1
  -1   0   7 -4.0671 11.3727   1
  -1   0   7 -10.817 12.3702   3
  -1   0   7 -11.481 29.6440   2
   1   0  -7 14.4686 12.5795   3
   1   0  -7 -39.193 28.1780   2
   0   0  -7 3.79304 13.9648   3
   0   0  -7 0.74333 23.3553   2
   0   0  -7 -5.8709 13.2186   1
   0   0   7 -19.107 12.9714   3
   0   0   7 -3.9607 28.0839   2
   1   0   7 14.3669 15.1352   3
  -1   0  -7 3.18308 24.1870   2
   1   0   7 7.55099 27.9869   2
  -1   0  -7 11.3674 14.9235   3
   2   0   7 -4.6844 15.3982   3
   2   0   7 -13.433 25.9772   2
  -2   0  -7 -3.3091 15.4967   3
  -2   0  -7 1.92968 18.4297   2
  -3   0  -7 0.22017 15.9462   2
   3   0   7 -6.1659 22.5302   2
  -3   0  -7 -5.1305 16.6180   3
  -4   0  -7 -6.4764 16.6127   3
  -4   0  -7 -1.6464 12.7590   2
   4   0   7 -13.432 18.7720   2
  -5   0  -7 4.21371 17.9015   3
   5   0   7 -0.4191 15.0040   2
  -5   0  -7 -17.963 11.1260   2
   6   0   7 9.12556 11.5175   2
  -6   0  -7 3.14772 19.0751   3
  -6   0  -7 -4.0499 8.83417   2
  -7   0  -7 -21.691 20.3978   3
  -8   0  -7 48.0508 24.2480   3
  -9   0  -7 9.94279 25.1066   3
 -10   0  -7 -9.8369 26.7424   3
 -11   0  -7 -20.479 29.0272   3
 -12   0  -7 -52.499 31.1141   3
 -13   0  -7 -62.585 32.8781   3
 -14   0  -7 -18.434 38.3250   3
  15  -1  -7 1.64701 31.5963   1
 -15  -1   7 -8.6616 33.8843   3
 -15   1   7 -21.836 32.6212   3
 -14  -1   7 0.55266 30.9644   3
  14  -1  -7 29.4224 30.9711   1
 -14   1   7 0.67331 30.8175   3
 -13  -1   7 8.52283 28.6564   3
  13  -1  -7 25.8903 29.3699   1
  13   1  -7 71.7927 28.7116   1
 -13   1   7 27.8123 29.3392   3
  12  -1  -7 39.4493 25.2223   1
 -12  -1   7 75.1453 26.0326   2
 -12  -1   7 29.7926 27.7484   3
  12   1  -7 36.4045 25.6171   1
 -12   1   7 4.03780 25.1216   3
 -11  -1   7 -11.847 23.9725   3
  11  -1  -7 -47.296 20.5817   1
 -11  -1   7 -14.696 22.1582   2
 -11   1   7 0.02455 22.5651   3
  11   1  -7 14.6731 20.8534   1
 -10  -1   7 30.0541 24.1924   3
  10  -1  -7 48.0874 25.5838   1
 -10  -1   7 21.9350 24.1154   2
  10   1  -7 19.1840 21.3064   1
 -10   1   7 12.7087 21.3022   3
  -9  -1   7 55.6469 26.8001   2
  -9  -1   7 28.9635 23.1313   3
   9  -1  -7 94.4999 23.9253   1
   9   1  -7 78.5402 22.3948   1
  -9   1   7 68.1876 21.1627   3
  -8  -1   7 51.2265 27.2158   2
  -8  -1   7 1.99563 19.2924   3
   8  -1  -7 12.4645 18.8221   1
  -8   1   7 17.7371 16.9525   3
   8   1  -7 2.69910 18.7609   1
   7  -1  -7 29.3676 19.0838   1
  -7  -1   7 28.2919 19.6185   3
  -7  -1   7 13.6556 26.8551   2
  -7   1   7 26.6798 15.5713   3
   7   1  -7 50.1513 18.0971   1
  -6  -1   7 23.5324 19.5850   3
   6  -1  -7 43.6668 17.1836   1
  -6  -1   7 -25.287 29.4398   2
   6   1  -7 31.9759 14.9800   1
  -6   1   7 -4.9911 13.1764   3
  -6   1   7 34.2874 21.0419   2
  -5  -1   7 1158.34 85.7642   2
   5  -1  -7 1262.61 74.7440   1
   5   1  -7 1226.59 71.3252   1
  -5   1   7 1280.76 77.3997   2
  -5   1   7 1289.56 70.2371   3
  -4  -1   7 1410.37 95.4630   2
  -4  -1   7 1506.98 81.6881   1
   4  -1  -7 1514.78 84.9775   1
  -4   1   7 1520.47 88.7597   2
  -4   1   7 1438.73 79.8030   3
   4   1  -7 1456.26 81.8356   1
   3  -1  -7 17.6968 16.7819   1
  -3  -1   7 17.6671 11.2860   1
  -3  -1   7 27.5393 26.2321   2
  -3   1   7 39.1211 22.0534   2
   3   1  -7 36.2463 12.7734   1
   2  -1  -7 942.336 55.9313   1
  -2  -1   7 911.538 54.3104   3
  -2  -1   7 924.663 51.1047   1
  -2  -1   7 835.192 62.0010   2
   2   1  -7 884.663 51.6480   1
  -2   1   7 882.821 54.7376   1
  -2   1   7 881.866 61.5120   2
   1  -1  -7 -2.0453 13.7874   1
   1  -1  -7 11.6405 20.3583   2
  -1  -1   7 28.1199 24.5900   2
  -1  -1   7 -0.6553 9.61004   1
  -1  -1   7 13.4325 14.0029   3
   1  -1  -7 16.4259 9.42111   3
  -1   1   7 4.02774 13.6942   1
  -1   1   7 25.3492 10.0498   3
  -1   1   7 -32.973 19.8801   2
   1   1  -7 24.3815 26.2535   2
   1   1  -7 5.77486 10.6629   1
   0  -1  -7 30.8505 11.4893   3
   0  -1  -7 29.1587 21.0042   2
   0  -1  -7 23.2366 16.2866   1
   0  -1   7 24.1015 23.4228   2
   0  -1   7 18.5602 15.5181   3
   0   1   7 15.5433 11.8220   3
   0   1   7 21.9522 14.2480   1
   0   1  -7 -10.307 20.3411   2
   0   1  -7 26.5704 16.6421   3
   0   1  -7 18.2673 10.7828   1
   0   1   7 38.5633 19.8802   2
  -1  -1  -7 8.11330 12.5331   3
   1  -1   7 20.8098 20.1596   2
   1  -1   7 5.04065 18.6402   3
  -1  -1  -7 19.9595 16.6395   1
  -1  -1  -7 -8.7060 17.1605   2
   1   1   7 -0.4430 20.5709   2
  -1   1  -7 3.58341 18.9428   2
   1   1   7 12.9888 13.9367   3
  -1   1  -7 -28.842 16.1961   3
  -2  -1  -7 -23.013 19.5950   2
  -2  -1  -7 32.8476 14.8742   3
   2  -1   7 5.49901 19.1380   2
   2   1   7 -15.456 14.7014   3
   2   1   7 33.9879 17.5068   2
  -2   1  -7 -4.1736 16.2846   2
  -2   1  -7 -2.7706 16.9255   3
  -3  -1  -7 -16.070 20.5573   2
   3  -1   7 -6.0975 16.7464   2
  -3  -1  -7 6.86587 14.8502   3
  -3   1  -7 10.0206 15.2534   2
  -3   1  -7 -2.4928 17.6265   3
  -4  -1  -7 9.39848 16.4137   3
   4  -1   7 18.6297 17.5879   2
  -4  -1  -7 8.20760 19.5364   2
  -4   1  -7 15.7025 18.7573   3
  -4   1  -7 37.4811 14.4117   2
  -5  -1  -7 4.03608 17.6594   3
   5  -1   7 -10.112 16.4032   2
  -5  -1  -7 18.7697 15.1882   2
  -5   1  -7 17.4374 19.3956   3
  -5   1  -7 17.8721 12.3566   2
  -6  -1  -7 -2.2376 19.1821   3
  -6  -1  -7 3.47436 10.2491   2
   6  -1   7 31.6154 17.6336   2
  -6   1  -7 13.6580 21.6757   3
  -6   1  -7 42.2493 12.4347   2
   7  -1   7 67.5394 20.1616   2
  -7  -1  -7 85.0781 24.4462   3
  -7   1  -7 76.6250 24.7961   3
  -8  -1  -7 16.2319 23.8076   3
   8  -1   7 4.51877 14.7254   2
  -8   1  -7 4.04172 23.9607   3
  -9  -1  -7 -3.1591 25.0260   3
  -9   1  -7 20.9229 26.4070   3
 -10  -1  -7 158.272 34.1308   3
 -10   1  -7 229.448 36.9357   3
 -11  -1  -7 127.692 35.6521   3
 -11   1  -7 127.554 35.4353   3
 -12  -1  -7 -5.7297 33.7066   3
 -12   1  -7 -8.8574 32.3730   3
 -13  -1  -7 71.8838 39.3572   3
 -13   1  -7 12.8101 35.1260   3
 -14  -1  -7 29.3000 53.1242   3
 -14   1  -7 12.3038 42.6668   3
 -15  -2   7 0.47800 35.3658   3
  15  -2  -7 -17.365 28.5689   1
 -14  -2   7 -28.906 30.9485   3
  14  -2  -7 0.36868 25.3887   1
 -14   2   7 15.5283 31.2260   3
 -13  -2   7 60.4868 32.0180   3
  13  -2  -7 49.5591 30.2640   1
 -13   2   7 20.5565 30.3168   3
 -12  -2   7 147.452 34.9206   3
  12  -2  -7 127.378 33.0956   1
 -12   2   7 117.140 31.6697   3
  11  -2  -7 225.813 33.2877   1
 -11  -2   7 138.215 32.1130   2
 -11  -2   7 166.862 32.2551   3
 -11   2   7 189.904 31.1309   3
 -10  -2   7 21.8017 25.5780   3
  10  -2  -7 23.2111 24.7160   1
 -10  -2   7 33.5016 29.6733   2
  10   2  -7 -2.3972 21.6958   1
 -10   2   7 -27.006 22.2936   3
  -9  -2   7 -27.991 22.8002   3
  -9  -2   7 -8.0374 30.4318   2
   9  -2  -7 7.88924 23.8710   1
   9   2  -7 10.1359 20.4981   1
  -9   2   7 -2.6865 20.6042   3
  -8  -2   7 51.6325 34.2582   2
   8  -2  -7 97.6499 22.7056   1
  -8  -2   7 122.525 26.8318   3
  -8   2   7 133.039 22.5450   3
   8   2  -7 97.7515 19.7025   1
  -7  -2   7 106.508 26.1340   3
  -7  -2   7 88.6041 34.5886   2
   7  -2  -7 101.531 22.0009   1
   7  -2  -7 117.106 17.4596   3
  -7   2   7 121.325 19.7725   3
   7   2  -7 114.396 19.7885   1
   6  -2  -7 9.70818 11.7015   3
  -6  -2   7 7.55513 26.9396   2
   6  -2  -7 25.4433 19.0417   1
   6   2  -7 -0.2842 13.1357   1
  -6   2   7 12.6817 14.0138   3
  -5  -2   7 -6.5870 12.6875   1
   5  -2  -7 25.7616 19.9456   1
  -5  -2   7 -7.0077 24.4519   2
  -5   2   7 6.77033 11.6592   3
   5   2  -7 19.9674 12.8668   1
  -4  -2   7 41.3249 24.1211   2
  -4  -2   7 40.7372 11.5303   1
   4  -2  -7 27.3199 17.5754   1
   4   2  -7 19.2965 11.0968   1
  -3  -2   7 -24.065 20.4873   2
   3  -2  -7 -18.188 17.2512   1
  -3  -2   7 -4.9719 8.87537   1
   3   2  -7 -13.520 8.45273   1
  -2  -2   7 106.551 24.2190   2
  -2  -2   7 106.447 10.5868   1
   2  -2  -7 138.268 20.3882   1
   2   2  -7 136.738 11.3725   1
  -1  -2   7 66.9630 20.1582   2
   1  -2  -7 63.6962 18.3284   1
   1   2  -7 55.3663 8.88379   1
   0  -2   7 23.4716 18.9401   2
   0  -2  -7 -2.5604 9.65938   3
   0  -2  -7 -8.8260 16.0416   1
   0   2   7 17.6255 10.0151   3
   0   2  -7 14.6324 17.8087   3
   0   2  -7 8.31872 7.76802   1
  -1  -2  -7 3.89780 16.9941   1
   1  -2   7 22.3511 16.4205   2
  -1  -2  -7 -0.0702 11.7725   3
   1   2   7 14.2563 12.3082   3
  -1   2  -7 30.1342 18.5075   3
   2  -2   7 305.710 29.0094   2
  -2  -2  -7 291.905 29.3550   1
  -2  -2  -7 309.844 27.7961   2
  -2  -2  -7 311.390 25.1728   3
  -2   2  -7 281.673 22.1142   1
  -2   2  -7 271.094 29.6319   3
   2   2   7 305.274 25.5814   3
  -3  -2  -7 2216.12 118.858   3
   3  -2   7 2051.00 119.223   2
  -3  -2  -7 2190.12 117.911   2
  -3   2  -7 2206.46 116.743   1
  -3   2  -7 2057.52 122.224   3
  -4  -2  -7 454.232 39.9286   3
  -4  -2  -7 482.675 34.4495   2
   4  -2   7 462.023 37.8481   2
  -4   2  -7 401.423 38.1643   3
  -5  -2  -7 -31.106 17.2178   3
  -5  -2  -7 10.4264 14.4242   2
   5  -2   7 17.1885 15.3707   2
  -5   2  -7 32.3680 20.8896   3
  -6  -2  -7 51.2811 21.8654   3
  -6  -2  -7 36.6729 16.3075   2
   6  -2   7 47.7666 16.6803   2
  -6   2  -7 15.8851 22.9986   3
  -6   2  -7 37.0960 14.2580   2
   7  -2   7 4.06517 15.1743   2
  -7  -2  -7 14.3340 9.70943   2
  -7  -2  -7 -44.367 14.4187   2
  -7  -2  -7 -21.280 21.4769   3
  -7   2  -7 -5.0071 22.6815   3
   8  -2   7 34.9194 15.8970   2
  -8  -2  -7 11.0676 25.7117   3
  -8   2  -7 68.4841 27.2797   3
  -9  -2  -7 -4.0133 26.8128   3
  -9   2  -7 -31.545 25.2559   3
 -10  -2  -7 -25.150 29.3040   3
 -10   2  -7 -22.673 28.5350   3
 -11  -2  -7 -13.270 32.6802   3
 -11   2  -7 3.59447 32.4863   3
 -12  -2  -7 18.1598 36.0822   3
 -12   2  -7 2.71391 34.0443   3
 -13  -2  -7 -23.460 38.0850   3
 -13   2  -7 4.76817 35.0691   3
 -15  -3   7 93.8628 40.2623   3
  14  -3  -7 32.3961 33.2677   1
 -14  -3   7 24.1069 34.2978   3
 -13  -3   7 55.8227 34.6434   3
  13  -3  -7 10.3590 25.8624   1
  12  -3  -7 -28.808 29.1889   1
 -12  -3   7 5.29608 30.0085   3
 -12   3   7 -58.337 27.7008   3
  11  -3  -7 14.1012 27.7471   1
 -11  -3   7 24.4183 34.5785   2
 -11  -3   7 -24.478 27.4135   3
 -11   3   7 38.5900 26.3949   3
 -10  -3   7 -6.4685 27.5307   3
  10  -3  -7 -12.485 24.5327   1
 -10  -3   7 34.1118 36.1096   2
 -10   3   7 -11.394 23.4680   3
  -9  -3   7 -26.895 31.9961   2
   9  -3  -7 -23.599 23.6366   1
  -9  -3   7 -16.720 25.0912   3
  -9   3   7 6.79255 22.0985   3
   8  -3  -7 -9.4378 22.7941   1
  -8  -3   7 14.8624 30.0320   2
  -8  -3   7 29.4369 26.0960   3
  -8   3   7 18.0790 19.7033   3
   7  -3  -7 99.6208 25.4585   1
   7  -3  -7 93.2042 16.2062   3
  -7  -3   7 159.356 31.4164   2
  -7   3   7 98.0371 19.1429   3
   6  -3  -7 245.626 29.5220   1
  -6  -3   7 243.792 32.4461   2
   6  -3  -7 212.778 19.1394   3
  -6   3   7 255.707 21.8171   3
  -5  -3   7 -0.4439 11.4118   1
   5  -3  -7 9.48978 20.1832   1
  -5  -3   7 -0.3131 21.3809   2
  -5   3   7 7.22313 9.45047   3
  -4  -3   7 46.3137 10.5139   1
  -4  -3   7 78.6572 23.0897   2
   4  -3  -7 67.2114 21.0059   1
  -3  -3   7 14.6080 19.4592   2
   3  -3  -7 7.47613 18.5510   1
   2  -3  -7 1.05972 15.6355   1
  -2  -3   7 17.6893 19.6647   2
   1  -3  -7 88.9502 10.6301   3
  -1  -3   7 40.9494 20.5205   2
   1  -3  -7 75.2269 17.9799   1
   0  -3  -7 97.6660 21.0184   1
   0  -3   7 100.968 24.6611   2
   0  -3  -7 114.642 14.2684   3
  -1  -3  -7 15.3166 19.8651   1
  -1  -3  -7 21.0861 13.8819   3
   1  -3   7 62.6709 22.2067   2
  -1   3  -7 29.5637 8.25079   1
  -1   3  -7 27.5517 19.8062   3
   2  -3   7 -8.9845 18.5812   2
  -2  -3  -7 10.7312 18.8152   1
  -2  -3  -7 -29.447 13.6211   3
  -2   3  -7 9.06161 19.7477   3
  -2   3  -7 2.25270 10.1171   1
   3  -3   7 12.1685 19.0592   2
  -3  -3  -7 -2.9733 16.6833   1
  -3  -3  -7 20.8837 16.3179   3
  -3   3  -7 8.52544 12.2216   1
  -3   3  -7 -8.1896 20.6009   3
   4  -3   7 -9.3619 19.4947   2
  -4  -3  -7 19.9563 18.6224   3
  -4   3  -7 1.42861 22.0562   3
   5  -3   7 42.2079 19.8522   2
  -5  -3  -7 -0.2870 19.3534   3
  -5   3  -7 47.4629 24.7111   3
   6  -3   7 33.3447 20.4751   2
  -6  -3  -7 54.3177 16.8692   2
  -6  -3  -7 32.0774 23.9906   3
  -6   3  -7 82.7695 26.9288   3
  -7  -3  -7 -8.3269 24.3924   3
  -7  -3  -7 11.1306 14.0990   2
   7  -3   7 24.3927 19.0360   2
  -7   3  -7 -23.916 24.9519   3
  -8  -3  -7 56.0955 28.8632   3
   8  -3   7 51.5650 19.6085   2
  -8   3  -7 2.78804 28.0195   3
  -9  -3  -7 -22.508 29.4546   3
  -9   3  -7 5.36594 29.9350   3
 -10  -3  -7 14.6624 31.2401   3
 -10   3  -7 12.7770 32.1241   3
 -11  -3  -7 20.2048 35.9912   3
 -11   3  -7 13.1271 34.1580   3
 -12  -3  -7 40.1411 38.6650   3
 -12   3  -7 -1.8072 35.6453   3
 -13  -3  -7 26.1365 40.9620   3
 -13   3  -7 47.1211 37.9693   3
 -14  -4   7 27.8017 37.9549   3
  14  -4  -7 61.4980 36.1127   1
 -13  -4   7 32.4453 35.2878   3
  13  -4  -7 47.1935 35.3382   1
 -12  -4   7 186.523 40.7950   3
  12  -4  -7 162.884 35.8535   1
 -11  -4   7 19.1089 39.7630   2
  11  -4  -7 90.0951 31.1484   1
 -11  -4   7 50.0975 34.3416   3
 -10  -4   7 129.805 39.0289   2
 -10  -4   7 124.956 34.9762   3
  10  -4  -7 132.368 31.8021   1
 -10   4   7 93.9177 41.3275   3
  -9  -4   7 102.566 32.6260   3
   9  -4  -7 137.092 28.8275   1
  -9  -4   7 57.6348 31.7150   2
  -9   4   7 160.500 25.4098   3
  -8  -4   7 17.0441 27.9453   2
   8  -4  -7 -15.381 24.1812   1
  -8   4   7 -2.4992 16.1618   3
  -7  -4   7 11.7447 24.4441   2
   7  -4  -7 55.4532 23.5904   1
  -7   4   7 1.79656 13.8004   3
  -6  -4   7 -19.933 20.9493   2
   6  -4  -7 40.1880 24.2928   1
  -6  -4   7 -6.7149 12.1952   1
   6  -4  -7 3.43604 11.8712   3
  -6   4   7 -1.9656 11.4799   3
  -5  -4   7 4.10023 22.0660   2
   5  -4  -7 16.9849 10.5912   3
  -5  -4   7 -16.450 10.0105   1
   5  -4  -7 10.3442 21.3522   1
   4  -4  -7 50.9882 22.1192   1
  -4  -4   7 60.3450 22.4705   2
   4  -4  -7 41.0047 9.90403   3
  -4  -4   7 7.35926 8.36365   1
  -3  -4   7 19.4323 21.9656   2
   3  -4  -7 -2.7697 18.9440   1
   2  -4  -7 -1.2199 9.15218   3
  -2  -4   7 -12.752 22.0550   2
   2  -4  -7 4.77423 18.7343   1
   1  -4  -7 208.920 27.1057   1
  -1  -4   7 204.216 28.7559   2
   1  -4  -7 167.111 16.5315   3
   0  -4  -7 96.7635 14.9769   3
   0  -4   7 102.610 26.8988   2
   0  -4  -7 75.0502 20.4025   1
  -1  -4  -7 67.2024 22.4868   1
   1  -4   7 53.9842 25.2962   2
  -1  -4  -7 38.5258 15.6588   3
  -1   4  -7 65.5093 22.0223   3
  -1   4  -7 10.5607 8.61084   1
  -2  -4  -7 74.8792 18.4362   3
  -2  -4  -7 13.6079 20.7698   1
   2  -4   7 61.5873 24.6518   2
  -2   4  -7 37.2399 22.2424   3
  -2   4  -7 66.2652 11.5430   1
  -3  -4  -7 830.097 56.3837   3
  -3  -4  -7 916.935 61.6007   1
   3  -4   7 772.125 60.2238   2
  -3   4  -7 843.362 49.9067   1
  -3   4  -7 799.119 63.9510   3
   4  -4   7 31.7044 23.1377   2
  -4  -4  -7 2.64104 21.2126   1
  -4  -4  -7 23.6766 20.1373   3
  -4   4  -7 13.4014 23.0542   3
  -5  -4  -7 506.041 42.7625   3
   5  -4   7 471.986 42.8268   2
  -5   4  -7 421.391 45.4710   3
  -6  -4  -7 290.113 35.0025   3
  -6  -4  -7 239.166 27.2530   2
   6  -4   7 236.535 32.2913   2
  -6   4  -7 209.565 35.9361   3
   7  -4   7 24.1357 22.7666   2
  -7  -4  -7 9.75857 18.0739   2
  -7  -4  -7 -10.931 26.3226   3
  -7   4  -7 -51.706 27.1181   3
   8  -4   7 -8.1853 20.2968   2
  -8  -4  -7 64.1203 30.4063   3
  -8   4  -7 8.75529 31.4100   3
  -9  -4  -7 -21.727 29.8978   3
  -9   4  -7 -1.4543 32.2448   3
 -10  -4  -7 -16.910 33.2280   3
 -10   4  -7 8.30143 34.8628   3
 -11  -4  -7 -2.8407 36.0767   3
 -11   4  -7 -45.800 34.9307   3
 -12  -4  -7 2.43792 37.8621   3
 -12   4  -7 21.0981 39.6108   3
 -13   4  -7 -50.743 40.6155   3
  13  -5  -7 53.5685 33.9093   1
 -13  -5   7 10.5373 38.4152   3
 -12  -5   7 -0.5246 35.9198   3
  12  -5  -7 -20.041 29.3717   1
 -11  -5   7 -35.891 33.1875   3
 -11  -5   7 2.59668 35.2107   2
  11  -5  -7 -22.238 29.6048   1
 -10  -5   7 4.62340 30.6449   2
 -10  -5   7 44.6870 35.6404   3
  10  -5  -7 47.0918 28.6148   1
   9  -5  -7 87.6644 28.9310   1
  -9  -5   7 73.1377 31.3617   2
  -9  -5   7 46.3359 33.8580   3
  -8  -5   7 193.690 34.7602   2
   8  -5  -7 179.374 32.9035   1
   7  -5  -7 31.6674 25.5950   1
  -7  -5   7 12.9482 26.1192   2
   6  -5  -7 22.7461 25.0321   1
  -6  -5   7 -28.144 22.1568   2
   5  -5  -7 145.945 28.6817   1
  -5  -5   7 213.944 33.4091   2
   4  -5  -7 584.881 50.1703   1
  -4  -5   7 619.912 35.3138   1
  -4  -5   7 662.939 55.5268   2
   4  -5  -7 558.400 39.0373   3
   3  -5  -7 174.330 27.4519   1
  -3  -5   7 219.496 32.2393   2
   3  -5  -7 192.969 18.7012   3
  -2  -5   7 91.5990 29.6314   2
   2  -5  -7 70.1992 23.4641   1
   2  -5  -7 96.4579 15.5075   3
   1  -5  -7 167.851 27.2226   1
   1  -5  -7 87.1351 15.8307   3
  -1  -5   7 118.236 30.7265   2
   1  -5  -7 89.9230 15.8721   3
   0  -5  -7 24.7318 15.3195   3
   0  -5   7 42.3669 24.5501   2
   0  -5  -7 2.97240 21.4478   1
   1  -5   7 20.3390 26.7984   2
  -1  -5  -7 5.38025 16.8290   3
  -1  -5  -7 -19.046 19.7706   1
  -2  -5  -7 6.94968 18.5420   3
  -2  -5  -7 -4.9982 20.6039   1
   2  -5   7 -7.4492 25.3461   2
  -2   5  -7 -5.6868 11.1391   1
  -3  -5  -7 16.9888 19.2409   3
  -3  -5  -7 30.9872 22.8280   1
   3  -5   7 17.5127 26.0200   2
  -3   5  -7 5.02778 25.3277   3
   4  -5   7 -23.153 25.0843   2
  -4  -5  -7 8.08714 21.5753   3
  -4  -5  -7 2.38101 23.0527   1
  -4   5  -7 -29.688 25.2563   3
  -5  -5  -7 43.0789 25.1013   3
  -5  -5  -7 104.632 26.9372   1
  -5  -5  -7 24.6630 23.9575   2
   5  -5   7 63.0537 26.5770   2
  -5   5  -7 23.6261 27.8210   3
  -6  -5  -7 93.1419 26.0256   2
   6  -5   7 106.264 28.4788   2
  -6  -5  -7 76.2451 29.0439   3
  -6  -5  -7 64.8326 26.2244   1
  -6   5  -7 112.768 32.2101   3
  -7  -5  -7 40.3936 30.6335   3
  -7  -5  -7 4.09745 21.0442   2
   7  -5   7 2.49273 24.7866   2
  -7   5  -7 -0.3125 30.8241   3
   8  -5   7 -11.850 24.2066   2
  -8  -5  -7 23.4103 31.7567   3
  -8   5  -7 -25.897 33.3828   3
  -9  -5  -7 -14.030 32.6210   3
  -9   5  -7 22.2708 36.4769   3
 -10  -5  -7 169.799 42.9377   3
 -10   5  -7 196.801 44.6732   3
 -11  -5  -7 162.374 45.3039   3
 -11   5  -7 173.383 46.5682   3
 -12  -5  -7 -8.9526 40.2489   3
 -12   5  -7 15.0008 43.0050   3
  12  -6  -7 -57.495 27.7677   1
 -12  -6   7 21.7277 42.1282   3
  11  -6  -7 -6.3993 30.0731   1
 -11  -6   7 6.27092 40.0819   3
 -10  -6   7 59.3978 39.5294   3
  10  -6  -7 -46.278 27.0247   1
 -10  -6   7 11.2013 31.0723   2
   9  -6  -7 -16.798 26.7644   1
  -9  -6   7 10.4055 29.8243   2
  -9  -6   7 70.9183 39.1682   3
  -8  -6   7 69.5169 30.8448   2
   8  -6  -7 55.0044 29.6015   1
  -7  -6   7 123.435 33.7453   2
   7  -6  -7 121.069 30.8788   1
   6  -6  -7 52.5902 28.0487   1
  -6  -6   7 35.2562 28.2165   2
   5  -6  -7 -29.835 22.8239   1
  -5  -6   7 -14.711 26.9946   2
  -4  -6   7 23.7886 29.5715   2
   4  -6  -7 -14.966 23.2045   1
  -3  -6   7 54.8321 29.8227   2
   3  -6  -7 -27.475 22.1503   1
  -2  -6   7 59.3144 32.4027   2
   2  -6  -7 69.1343 26.4842   1
  -1  -6   7 24.1493 28.1658   2
   1  -6  -7 92.3186 27.3546   1
   0  -6  -7 204.279 31.8480   1
   0  -6   7 128.504 32.8673   2
  -1  -6  -7 282.446 34.5487   1
   1  -6   7 293.083 41.5475   2
   2  -6   7 50.2225 28.1978   2
  -2  -6  -7 13.1329 23.0519   1
  -2  -6  -7 12.9698 21.2170   3
   3  -6   7 56.5103 31.6025   2
  -3  -6  -7 43.3139 22.3447   3
  -3  -6  -7 54.4680 25.2505   1
  -4  -6  -7 28.2232 24.1741   3
  -4  -6  -7 -14.989 25.7992   2
  -4  -6  -7 69.8491 27.3662   1
   4  -6   7 39.3404 30.0187   2
  -4   6  -7 115.411 32.5688   3
   5  -6   7 -34.765 28.2429   2
  -5  -6  -7 -56.529 24.4456   2
  -5  -6  -7 14.8853 24.6200   3
  -5  -6  -7 -12.851 25.2677   1
  -5   6  -7 7.17809 29.7143   3
  -6  -6  -7 7.95154 26.8590   1
   6  -6   7 -8.1134 28.4536   2
  -6  -6  -7 54.7008 27.7725   3
  -6  -6  -7 -7.5439 24.9595   2
  -6   6  -7 4.76592 32.1956   3
  -7  -6  -7 92.4808 27.6337   2
  -7  -6  -7 94.3833 32.5908   3
   7  -6   7 57.2329 29.4498   2
  -7  -6  -7 82.6898 31.0223   1
  -7   6  -7 40.7836 36.8353   3
  -8  -6  -7 35.5093 33.4478   3
   8  -6   7 36.2047 29.7727   2
  -8  -6  -7 2.67570 27.9165   1
  -8   6  -7 55.1017 38.1540   3
  -9  -6  -7 -0.8635 34.6201   3
  -9   6  -7 28.9235 39.7424   3
 -10  -6  -7 -40.088 36.3747   3
 -10   6  -7 30.1722 41.9585   3
 -11  -6  -7 -30.743 40.0266   3
 -11   6  -7 -17.308 41.8839   3
  11  -7  -7 8.09651 31.8454   1
  10  -7  -7 11.6123 29.0118   1
 -10  -7   7 -13.355 31.6263   2
 -10  -7   7 -19.835 41.2413   3
   9  -7  -7 33.4246 28.4879   1
  -9  -7   7 49.5404 43.0465   3
  -9  -7   7 -3.2793 30.4106   2
   8  -7  -7 91.4731 32.5772   1
  -8  -7   7 47.9020 31.7176   2
   7  -7  -7 1.84039 29.5902   1
  -7  -7   7 56.3910 32.6421   2
   6  -7  -7 21.0117 27.6740   1
  -6  -7   7 64.5390 31.0515   2
  -5  -7   7 195.271 41.1422   2
   5  -7  -7 267.648 35.9715   1
   4  -7  -7 35.2949 26.6851   1
  -4  -7   7 75.7362 33.8505   2
  -3  -7   7 11.3045 32.4046   2
   3  -7  -7 44.6893 25.0395   1
  -2  -7   7 390.177 49.2348   2
   2  -7  -7 411.325 41.7951   1
   1  -7  -7 110.972 28.8282   1
  -1  -7   7 98.3510 36.4278   2
   0  -7   7 3.38752 29.9104   2
   0  -7  -7 52.5780 20.5212   3
   0  -7  -7 65.6186 28.1852   1
   1  -7   7 24.6191 31.1266   2
  -1  -7  -7 44.4955 21.5419   3
  -1  -7  -7 -0.1627 25.3924   1
  -2  -7  -7 -21.408 22.6706   1
   2  -7   7 5.66180 32.6588   2
  -2  -7  -7 -2.1407 20.9110   3
  -2  -7  -7 27.1584 31.4403   2
   3  -7   7 3.19806 32.4608   2
  -3  -7  -7 -16.645 24.6801   1
  -3  -7  -7 6.92889 22.1689   3
  -3  -7  -7 -0.1647 30.1793   2
  -4  -7  -7 22.5866 25.7928   1
   4  -7   7 109.603 36.2530   2
  -4  -7  -7 10.7101 29.2473   2
  -4  -7  -7 17.7026 26.0323   3
  -5  -7  -7 73.2535 28.9714   3
  -5  -7  -7 112.861 30.2031   1
  -5  -7  -7 57.8408 30.3912   2
   5  -7   7 46.0147 33.0221   2
  -6  -7  -7 61.4369 30.4078   3
  -6  -7  -7 48.0270 29.9616   2
  -6  -7  -7 62.0605 30.6505   1
   6  -7   7 76.3696 34.8578   2
  -6   7  -7 54.7719 36.9972   3
  -7  -7  -7 33.3005 29.8251   3
   7  -7   7 33.3939 34.3669   2
  -7  -7  -7 -27.814 28.1659   1
  -7   7  -7 73.0682 41.3048   3
  -8  -7  -7 30.8880 29.1337   1
  -8  -7  -7 45.2856 36.0103   3
   8  -7   7 -12.938 32.3516   2
  -8   7  -7 43.7280 39.1629   3
  -9  -7  -7 37.6677 31.8835   1
  -9  -7  -7 32.9056 39.0032   3
  -9   7  -7 -50.514 38.1717   3
   9  -8  -7 136.171 41.9489   2
   9  -8  -7 100.689 31.9766   1
  -9  -8   7 37.7964 35.1804   2
   8  -8  -7 99.7076 32.6837   1
  -8  -8   7 59.6834 33.9468   2
  -7  -8   7 -33.291 29.7001   2
   7  -8  -7 -68.565 30.3846   1
  -6  -8   7 -50.378 32.8187   2
   6  -8  -7 -56.703 28.8717   1
  -5  -8   7 -29.087 32.5703   2
   5  -8  -7 -44.992 28.5560   1
   4  -8  -7 21.2641 27.3515   1
  -4  -8   7 -18.775 31.0790   2
   3  -8  -7 -10.281 24.9956   1
  -3  -8   7 25.9565 35.3504   2
   2  -8  -7 58.3580 28.5416   1
  -2  -8   7 41.2663 36.0160   2
   2  -8  -7 75.6939 36.0305   2
   1  -8  -7 53.2468 35.2461   2
   1  -8  -7 181.964 33.4442   1
  -1  -8   7 143.818 40.6639   2
   0  -8  -7 21.0511 26.7326   1
   0  -8  -7 13.5745 33.0298   2
   0  -8   7 56.6869 38.5631   2
  -1  -8  -7 67.2426 31.3915   1
  -1  -8  -7 7.41035 32.5975   2
   1  -8   7 35.0625 36.8576   2
  -2  -8  -7 50.1558 30.6601   1
   2  -8   7 71.1542 39.7135   2
  -2  -8  -7 0.96703 31.7218   2
  -3  -8  -7 70.5396 37.3862   2
   3  -8   7 149.863 42.9723   2
  -3  -8  -7 185.422 36.7719   1
  -4  -8  -7 71.1867 29.3144   3
  -4  -8  -7 130.614 32.0022   1
   4  -8   7 101.212 42.0687   2
  -4  -8  -7 122.582 36.4758   2
   5  -8   7 118.740 40.4847   2
  -5  -8  -7 49.3395 30.8016   3
  -5  -8  -7 141.242 32.5201   1
  -5  -8  -7 131.815 34.6278   2
  -6  -8  -7 -33.913 27.2022   2
  -6  -8  -7 -6.1300 27.6358   1
   6  -8   7 -48.694 34.1029   2
  -6  -8  -7 -7.1021 28.6926   3
   7  -8   7 34.4295 35.3783   2
  -7  -8  -7 -33.587 28.4454   1
  -7  -8  -7 18.0126 30.2645   3
  -5  -9   7 24.1940 38.3584   2
   5  -9  -7 -69.297 30.8634   1
   5  -9  -7 87.9797 73.1522   2
   4  -9  -7 22.9595 30.3231   1
  -4  -9   7 -18.568 36.8516   2
   4  -9  -7 42.2491 41.1119   2
   3  -9  -7 33.6428 30.3133   1
   3  -9  -7 86.8386 42.9551   2
  -3  -9   7 -2.4348 34.4055   2
   2  -9  -7 63.7617 30.0772   1
   2  -9  -7 54.5071 36.6769   2
  -2  -9   7 -36.794 33.7545   2
   1  -9  -7 60.4974 36.0000   2
  -1  -9   7 4.39258 40.1957   2
   1  -9  -7 25.2896 30.0768   1
   0  -9  -7 71.2395 31.7848   1
   0  -9  -7 32.6103 37.5835   2
   0  -9   7 68.6678 44.2119   2
  -1  -9  -7 51.4049 31.9948   1
   1  -9   7 29.8863 42.7565   2
  -1  -9  -7 44.5599 38.5243   2
  -2  -9  -7 1.69602 30.5451   1
   2  -9   7 -44.956 39.9975   2
  -2  -9  -7 27.8872 36.5160   2
  -3  -9  -7 9.51530 35.2167   2
  -3  -9  -7 -34.271 29.9002   1
   3  -9   7 -25.268 40.0149   2
   4  -9   7 -12.146 40.9905   2
  -4  -9  -7 -23.874 30.6667   1
  -4  -9  -7 -0.1827 33.9010   2
 -15   0   8 20.9519 33.0294   3
  15   0  -8 57.6986 32.8251   1
  14   0  -8 339.639 42.4950   1
 -14   0   8 289.736 43.5022   3
  13   0  -8 955.564 74.3313   1
 -13   0   8 992.348 78.1853   3
  12   0  -8 94.0859 27.8169   1
 -12   0   8 101.171 28.5581   3
 -11   0   8 20.5829 24.0536   3
  11   0  -8 -17.874 23.0622   1
 -10   0   8 176.754 27.6060   3
  10   0  -8 152.963 27.8072   1
 -10   0   8 180.920 28.6392   2
  -9   0   8 22.8880 19.8967   3
  -9   0   8 4.41047 21.9901   2
   9   0  -8 -1.9003 20.3590   1
  -8   0   8 43.7335 18.4894   3
   8   0  -8 51.1146 21.3103   1
  -8   0   8 89.7026 27.0833   2
   7   0  -8 198.780 24.4219   1
  -7   0   8 209.565 31.2295   2
  -7   0   8 216.662 23.6123   3
  -6   0   8 65.9332 16.9582   3
  -6   0   8 18.7999 26.2317   2
   6   0  -8 57.0057 19.2686   1
   5   0  -8 -24.831 14.9186   1
  -5   0   8 -4.4359 25.4016   2
  -4   0   8 245.700 35.5252   2
   4   0  -8 296.427 25.5850   1
  -3   0   8 212.120 20.4008   1
  -3   0   8 184.607 36.0232   2
   3   0  -8 185.323 20.9662   1
   2   0  -8 744.142 45.6284   1
  -2   0   8 702.528 60.7827   2
  -2   0   8 696.916 43.6007   3
  -2   0   8 690.645 44.2835   1
  -1   0   8 962.457 68.2336   2
  -1   0   8 815.935 50.8183   1
  -1   0   8 902.916 52.0730   3
   1   0  -8 794.286 51.6082   1
   1   0  -8 879.541 52.1910   3
   0   0  -8 2071.67 114.938   1
   0   0   8 2071.23 115.454   3
   0   0   8 2190.45 126.108   2
   0   0  -8 2099.69 115.720   3
   0   0  -8 2184.63 125.075   2
  -1   0  -8 9845.36 510.153   1
   1   0   8 9766.96 510.649   3
  -1   0  -8 9396.16 513.624   2
  -1   0  -8 9893.12 510.573   3
   1   0   8 9999.99 515.519   2
  -2   0  -8 4103.17 229.369   2
  -2   0  -8 4228.13 227.951   3
   2   0   8 4538.29 232.393   2
   3   0   8 23.6529 24.8204   2
  -3   0  -8 23.0263 17.7940   3
  -3   0  -8 19.9989 17.7174   2
  -4   0  -8 435.236 33.6084   2
  -4   0  -8 360.607 34.3038   3
   4   0   8 483.010 40.2141   2
   5   0   8 35.2649 18.0259   2
  -5   0  -8 56.0886 20.7915   3
  -5   0  -8 61.5386 14.5756   2
  -6   0  -8 123.382 26.6473   3
  -6   0  -8 244.436 19.3032   2
   6   0   8 206.576 21.4590   2
  -7   0  -8 7.48396 8.67633   2
  -7   0  -8 -12.782 21.2905   3
  -8   0  -8 -22.221 23.3011   3
  -9   0  -8 5.49475 26.1254   3
 -10   0  -8 9.65907 29.0360   3
 -11   0  -8 37.7089 31.5105   3
 -12   0  -8 197.904 42.5644   3
 -13   0  -8 146.096 42.3759   3
  15  -1  -8 -63.105 24.8076   1
 -15  -1   8 32.3931 35.7907   3
 -15   1   8 -8.5958 32.4170   3
 -14  -1   8 13.8476 31.4438   3
  14  -1  -8 21.2264 27.4922   1
 -14   1   8 74.5828 32.8756   3
  14   1  -8 12.1904 30.1062   1
 -13  -1   8 10.6213 28.6299   3
  13  -1  -8 41.2022 29.8608   1
  13   1  -8 -5.9468 26.6305   1
 -13   1   8 -18.249 27.0698   3
 -12  -1   8 -13.309 25.8468   3
  12  -1  -8 14.2645 23.6528   1
 -12  -1   8 -9.7535 22.9986   2
  12   1  -8 1.35921 24.0403   1
 -12   1   8 -6.1969 24.3892   3
  11  -1  -8 -13.730 26.0827   1
 -11  -1   8 -25.173 23.3450   2
 -11  -1   8 15.2125 25.1676   3
 -11   1   8 23.9390 23.3259   3
  11   1  -8 15.4033 23.9980   1
  10  -1  -8 -28.840 20.1845   1
 -10  -1   8 30.2833 23.2863   3
 -10  -1   8 28.5125 26.1305   2
 -10   1   8 7.10382 20.5985   3
  10   1  -8 15.6477 20.8647   1
   9  -1  -8 10.9103 22.2873   1
  -9  -1   8 9.58680 26.0589   2
  -9  -1   8 -1.0902 20.8469   3
  -9   1   8 16.6004 18.7410   3
   9   1  -8 -19.101 18.5100   1
   8  -1  -8 164.648 26.6329   1
  -8  -1   8 195.708 34.4663   2
  -8  -1   8 118.595 24.5373   3
  -8   1   8 111.861 20.8324   3
  -7  -1   8 176.844 25.7732   3
  -7  -1   8 183.038 37.2011   2
   7  -1  -8 257.250 28.3490   1
  -7   1   8 206.984 22.2941   3
   7   1  -8 188.675 24.2079   1
  -6  -1   8 139.558 34.4339   2
   6  -1  -8 144.681 23.7201   1
  -6   1   8 163.536 18.7468   3
   6   1  -8 201.466 21.3113   1
  -6   1   8 156.062 27.5244   2
  -5  -1   8 195.869 37.6932   2
   5  -1  -8 231.281 26.7006   1
   5   1  -8 251.300 23.3334   1
  -5   1   8 303.660 33.1113   2
  -5   1   8 278.777 23.6204   3
   4  -1  -8 918.497 56.5843   1
  -4  -1   8 868.767 52.3072   1
  -4  -1   8 732.261 69.4058   2
  -4   1   8 906.865 50.1842   3
   4   1  -8 899.337 52.9577   1
  -4   1   8 845.526 62.1364   2
   3  -1  -8 26.5950 16.7028   1
  -3  -1   8 13.3263 11.5113   1
  -3  -1   8 20.8981 31.7105   2
   3   1  -8 16.2634 12.6791   1
  -3   1   8 19.8281 8.46836   3
  -3   1   8 -24.700 20.5507   2
  -2  -1   8 63.2601 30.3830   2
  -2  -1   8 66.5263 11.9089   1
  -2  -1   8 82.9801 15.9135   3
   2  -1  -8 48.6076 17.6841   1
   2   1  -8 62.6884 13.3525   1
  -2   1   8 63.1629 25.5986   2
  -2   1   8 74.4758 10.6910   3
  -1  -1   8 105.493 12.9781   1
   1  -1  -8 71.7132 17.0833   1
  -1  -1   8 126.347 30.0284   2
   1  -1  -8 117.286 13.0568   3
  -1  -1   8 99.6951 17.9436   3
  -1   1   8 98.9096 24.7121   2
   1   1  -8 96.6928 13.9874   1
  -1   1   8 96.8503 13.1330   3
   1   1  -8 104.577 18.7502   3
   0  -1   8 93.8854 27.2369   2
   0  -1  -8 64.0875 17.1231   1
   0  -1   8 62.4713 20.8366   3
   0  -1  -8 65.3976 13.6136   3
   0   1  -8 57.5441 12.8539   1
   0   1  -8 64.1707 18.0506   3
   0   1   8 87.7512 25.7228   2
   0   1   8 113.597 15.1922   3
   1  -1   8 66.7644 24.2767   2
  -1  -1  -8 38.2195 17.6393   1
  -1  -1  -8 66.8910 24.9773   2
  -1  -1  -8 73.3967 15.0563   3
   1   1   8 64.8650 15.7346   3
   1   1   8 51.3940 21.9653   2
  -1   1  -8 45.7906 18.9384   3
   2  -1   8 180.214 26.6730   2
  -2  -1  -8 107.283 26.3923   2
  -2  -1  -8 138.861 19.4149   3
  -2   1  -8 144.871 22.4825   3
  -2   1  -8 148.748 23.7855   2
   2   1   8 162.916 21.2742   3
   2   1   8 159.174 23.8498   2
  -3  -1  -8 47.2660 17.6447   3
   3  -1   8 78.6404 21.6316   2
  -3  -1  -8 61.0764 24.3503   2
  -3   1  -8 48.7746 17.9440   2
  -3   1  -8 96.8527 21.1786   3
   4  -1   8 -2.8068 19.8995   2
  -4  -1  -8 -0.2861 20.2059   2
  -4  -1  -8 32.4244 18.0106   3
  -4   1  -8 1.26088 14.4007   2
  -4   1  -8 13.9336 18.8637   3
  -5  -1  -8 104.393 23.6574   3
  -5  -1  -8 204.718 22.3199   2
   5  -1   8 231.307 26.6957   2
  -5   1  -8 138.886 26.2278   3
  -5   1  -8 173.381 19.9029   2
  -6  -1  -8 427.062 37.6356   3
  -6  -1  -8 339.692 28.5595   2
   6  -1   8 395.361 35.6022   2
  -6   1  -8 343.898 36.5938   3
  -6   1  -8 406.534 29.6240   2
  -7  -1  -8 881.117 62.1327   3
   7  -1   8 681.150 54.8212   2
  -7   1  -8 730.176 62.6672   3
  -7   1  -8 830.552 47.1345   2
  -8  -1  -8 110.754 27.8234   3
  -8   1  -8 74.9401 27.9971   3
  -9  -1  -8 11.0228 26.0717   3
  -9   1  -8 -41.085 25.2033   3
 -10  -1  -8 9.53438 29.8737   3
 -10   1  -8 76.9021 30.8169   3
 -11  -1  -8 -28.426 30.1250   3
 -11   1  -8 -26.748 30.0904   3
 -12  -1  -8 55.6851 36.6026   3
 -12   1  -8 13.1484 34.0884   3
 -13  -1  -8 115.284 41.1815   3
 -13   1  -8 23.7507 37.3765   3
 -15  -2   8 -24.702 32.3916   3
  15  -2  -8 -17.807 32.4800   1
  14  -2  -8 -50.814 26.3388   1
 -14  -2   8 48.4602 34.6557   3
  13  -2  -8 25.9730 31.2283   1
 -13  -2   8 20.5898 30.0304   3
 -13   2   8 62.0053 30.2040   3
 -12  -2   8 214.506 34.7703   2
 -12  -2   8 186.161 37.7054   3
  12  -2  -8 260.704 38.3574   1
 -12   2   8 226.231 34.9512   3
 -11  -2   8 267.107 38.8511   3
  11  -2  -8 275.270 37.4460   1
 -11  -2   8 326.663 40.6053   2
  11   2  -8 269.688 34.5809   1
 -11   2   8 417.779 38.8500   3
 -10  -2   8 -8.1018 23.4601   3
  10  -2  -8 -5.9975 25.7089   1
 -10  -2   8 33.1036 31.8353   2
 -10   2   8 -17.763 21.7000   3
  10   2  -8 -3.7679 21.8971   1
  -9  -2   8 200.414 41.4516   2
   9  -2  -8 317.165 35.6925   1
  -9  -2   8 209.981 32.3842   3
   9   2  -8 229.023 29.0741   1
  -9   2   8 294.580 30.7809   3
  -8  -2   8 -48.138 33.4875   2
  -8  -2   8 48.2004 23.9128   3
   8  -2  -8 43.8985 24.0659   1
   8   2  -8 23.3469 18.7659   1
  -8   2   8 39.3506 19.2752   3
   7  -2  -8 144.486 26.3215   1
  -7  -2   8 131.312 38.6220   2
   7   2  -8 113.208 19.0147   1
  -7   2   8 106.915 19.7394   3
   6  -2  -8 14.4070 19.8425   1
  -6  -2   8 44.6560 30.6628   2
  -6   2   8 14.2623 13.7238   3
   6   2  -8 -15.390 13.7958   1
   5  -2  -8 96.6305 22.2790   1
  -5  -2   8 150.524 29.4154   2
  -5  -2   8 105.736 15.8102   1
   5   2  -8 161.590 16.9308   1
  -4  -2   8 -5.2016 10.2413   1
  -4  -2   8 20.9178 22.5937   2
   4  -2  -8 42.2100 19.0136   1
   4   2  -8 22.2868 11.3331   1
  -3  -2   8 12.7492 20.2508   2
   3  -2  -8 15.5825 17.0442   1
  -3  -2   8 15.8041 9.56413   1
   3   2  -8 17.5860 9.35481   1
  -2  -2   8 37.1847 21.8013   2
   2  -2  -8 49.1555 16.5525   1
  -2  -2   8 76.6581 9.49567   1
   2   2  -8 36.5867 9.48472   1
  -1  -2   8 946.743 61.6924   2
   1  -2  -8 983.114 60.4916   1
   1   2  -8 922.960 52.1441   1
   0  -2   8 1157.32 76.1301   2
   0  -2  -8 1217.67 74.4708   1
   0  -2  -8 1259.15 68.2100   3
   0   2  -8 1256.58 67.1899   1
   0   2  -8 1308.89 76.1077   3
   0   2   8 1202.06 68.2475   3
  -1  -2  -8 120.612 16.0951   3
  -1  -2  -8 153.883 23.0389   1
   1  -2   8 167.746 23.8404   2
   1   2   8 138.815 17.2937   3
  -1   2  -8 158.531 23.1432   3
  -2  -2  -8 72.2062 20.0974   1
   2  -2   8 48.0948 18.4459   2
  -2  -2  -8 55.0945 15.5302   3
  -2   2  -8 60.8171 21.1785   3
   2   2   8 43.1744 15.7955   3
  -3  -2  -8 356.888 31.0936   3
   3  -2   8 390.957 34.2717   2
  -3  -2  -8 395.061 34.6739   2
  -3   2  -8 424.842 37.4657   3
  -4  -2  -8 154.633 21.5477   2
   4  -2   8 128.986 21.8680   2
  -4  -2  -8 130.900 22.5390   3
  -4   2  -8 110.281 24.8743   3
   5  -2   8 76.6653 19.2738   2
  -5  -2  -8 66.5207 21.6496   3
  -5  -2  -8 15.2089 17.6279   2
  -5   2  -8 133.941 26.2479   3
  -6  -2  -8 11.5443 21.9444   3
  -6  -2  -8 13.5630 19.5436   2
   6  -2   8 34.8835 18.0847   2
  -6   2  -8 20.3590 23.2434   3
   7  -2   8 5.93215 16.4419   2
  -7  -2  -8 -9.1445 23.4805   3
  -7   2  -8 18.1472 24.9691   3
   8  -2   8 7.57307 16.9267   2
  -8  -2  -8 27.2263 26.6515   3
  -8   2  -8 -3.3154 25.5050   3
  -9  -2  -8 64.2842 30.9390   3
  -9   2  -8 62.5738 29.7321   3
 -10  -2  -8 6.77307 31.5994   3
 -10   2  -8 45.3678 31.3083   3
 -11  -2  -8 40.6279 35.0121   3
 -11   2  -8 -2.2496 32.7116   3
 -12  -2  -8 -7.1586 37.0975   3
 -12   2  -8 -5.1052 33.8499   3
 -13  -2  -8 43.8764 41.8436   3
 -13   2  -8 87.7306 41.6090   3
 -15  -3   8 115.645 41.5452   3
 -14  -3   8 106.038 38.5395   3
  14  -3  -8 43.8616 31.0125   1
 -13  -3   8 29.7928 31.8670   3
  13  -3  -8 29.0239 29.0949   1
  12  -3  -8 -45.365 23.0487   1
 -12  -3   8 15.2761 31.1347   3
 -11  -3   8 96.6809 39.9416   2
  11  -3  -8 128.638 31.8325   1
 -11  -3   8 162.983 34.2966   3
 -11   3   8 136.297 31.2670   3
  10  -3  -8 91.5171 30.5088   1
 -10  -3   8 96.8654 41.9656   2
 -10  -3   8 115.585 30.7704   3
 -10   3   8 44.7146 25.2186   3
  -9  -3   8 125.823 30.4448   3
   9  -3  -8 73.9272 27.5280   1
  -9  -3   8 107.280 37.4107   2
  -9   3   8 49.1463 22.4429   3
  -8  -3   8 154.707 31.3253   3
  -8  -3   8 152.978 36.4421   2
   8  -3  -8 172.287 29.5160   1
  -8   3   8 156.989 22.9766   3
   7  -3  -8 1475.82 94.6599   1
   7  -3  -8 1599.45 87.8346   3
  -7  -3   8 1670.25 103.430   2
  -7   3   8 1637.42 90.4251   3
   6  -3  -8 3543.42 200.130   1
  -6  -3   8 3827.65 204.441   2
  -6   3   8 3667.93 193.789   3
  -5  -3   8 1469.44 91.8768   2
   5  -3  -8 1447.00 88.7121   1
  -5  -3   8 1452.98 80.7553   1
   5   3  -8 1508.61 81.3626   1
   4  -3  -8 28.1996 19.9887   1
  -4  -3   8 9.59310 8.94418   1
  -4  -3   8 20.3755 22.0011   2
  -3  -3   8 12.1318 6.57380   1
  -3  -3   8 9.39686 20.0910   2
   3  -3  -8 48.0520 20.6125   1
   2  -3  -8 5.08896 18.5888   1
  -2  -3   8 -13.206 19.7098   2
  -1  -3   8 126.560 24.8873   2
   1  -3  -8 139.227 23.4183   1
   0  -3  -8 37.6052 11.9384   3
   0  -3   8 80.6507 22.8689   2
   0  -3  -8 12.5306 18.4937   1
  -1  -3  -8 28.3459 13.9160   3
   1  -3   8 81.6188 22.1543   2
  -1  -3  -8 87.2858 20.0404   1
  -1   3  -8 54.3454 9.87777   1
  -1   3  -8 56.7105 21.5346   3
  -2  -3  -8 49.4784 20.0617   1
   2  -3   8 17.1405 20.2708   2
  -2  -3  -8 16.3104 15.2743   3
  -2   3  -8 5.46165 20.5864   3
  -2   3  -8 13.6158 11.0857   1
  -3  -3  -8 50.8552 17.7446   3
   3  -3   8 50.6761 20.9854   2
  -3  -3  -8 61.3936 21.4030   1
  -3   3  -8 119.344 25.0556   3
  -3   3  -8 68.0016 14.7558   1
  -4  -3  -8 8.68346 18.3036   3
   4  -3   8 0.50608 19.8218   2
  -4   3  -8 16.0561 22.7282   3
   5  -3   8 627.278 48.5883   2
  -5  -3  -8 584.383 51.3839   3
  -5   3  -8 638.263 52.6082   3
   6  -3   8 217.044 27.8566   2
  -6  -3  -8 323.396 41.0847   2
  -6  -3  -8 200.359 31.5542   3
  -6   3  -8 209.603 33.8869   3
  -7  -3  -8 453.077 33.5552   2
  -7  -3  -8 379.691 42.0224   3
   7  -3   8 439.473 37.7873   2
  -7   3  -8 378.174 44.4440   3
   8  -3   8 970.657 63.8988   2
  -8  -3  -8 976.780 75.2449   3
  -8   3  -8 1014.03 79.0575   3
  -9  -3  -8 849.589 67.4771   3
  -9   3  -8 777.915 67.8051   3
 -10  -3  -8 33.2009 34.1194   3
 -10   3  -8 -16.528 32.0010   3
 -11  -3  -8 26.9544 38.2075   3
 -11   3  -8 75.7396 38.2720   3
 -12  -3  -8 33.9307 41.3996   3
 -12   3  -8 87.5684 38.8135   3
 -13  -3  -8 29.2778 42.2827   3
 -13   3  -8 -2.0339 37.8333   3
 -14  -4   8 57.2477 38.0421   3
  14  -4  -8 -48.139 28.9708   1
  13  -4  -8 45.8823 32.8912   1
 -13  -4   8 98.8687 37.7900   3
 -12  -4   8 51.1471 32.8089   3
  12  -4  -8 40.1351 29.1262   1
 -11  -4   8 30.2240 41.3606   2
  11  -4  -8 39.8012 29.8032   1
 -11  -4   8 36.5527 31.7290   3
 -10  -4   8 -10.405 36.2033   2
  10  -4  -8 39.7653 27.4229   1
 -10  -4   8 -0.2717 29.7634   3
  -9  -4   8 19.9846 33.0898   2
  -9  -4   8 31.6874 29.8185   3
   9  -4  -8 -4.8463 26.7319   1
   8  -4  -8 -16.612 24.4988   1
  -8  -4   8 9.02775 28.5118   2
  -8   4   8 -2.5832 15.0855   3
   7  -4  -8 48.8900 25.5354   1
  -7  -4   8 75.1617 28.8731   2
  -6  -4   8 -2.5696 12.1988   1
  -6  -4   8 41.1447 26.7934   2
   6  -4  -8 29.5552 23.9576   1
  -5  -4   8 28.5280 10.6759   1
  -5  -4   8 54.6022 25.3828   2
   5  -4  -8 39.4929 21.2314   1
  -4  -4   8 -4.4125 7.16906   1
  -4  -4   8 21.0749 22.7943   2
   4  -4  -8 -7.8153 20.2732   1
  -3  -4   8 6.98008 20.5666   2
   3  -4  -8 37.5566 20.4056   1
   2  -4  -8 3.86267 20.8819   1
  -2  -4   8 29.5130 21.3963   2
   1  -4  -8 193.251 27.2000   1
  -1  -4   8 199.618 30.1993   2
   1  -4  -8 192.830 16.9428   3
   0  -4  -8 180.584 26.6447   1
   0  -4   8 196.612 31.7887   2
   0  -4  -8 186.636 18.8531   3
   1  -4   8 148.861 27.8406   2
  -1  -4  -8 124.153 24.1572   1
  -1  -4  -8 131.674 19.3222   3
  -1   4  -8 131.976 11.3664   1
  -1   4  -8 107.674 25.8466   3
  -2  -4  -8 78.5725 19.0447   3
  -2  -4  -8 103.700 26.5739   1
   2  -4   8 69.5207 26.2868   2
  -2   4  -8 71.3114 12.2504   1
  -2   4  -8 97.8866 26.4223   3
  -3  -4  -8 -6.2164 21.8995   1
   3  -4   8 15.9414 24.1427   2
  -3  -4  -8 -4.0278 18.3063   3
  -3   4  -8 12.9587 12.6987   1
  -3   4  -8 10.8316 23.9036   3
  -4  -4  -8 -9.4361 18.9957   3
   4  -4   8 30.2408 23.5434   2
  -4  -4  -8 7.67269 23.2671   1
  -4   4  -8 -1.6948 23.3016   3
  -5  -4  -8 24.8429 21.0826   3
   5  -4   8 21.5964 22.3029   2
  -5   4  -8 -3.0071 26.4671   3
   6  -4   8 10.5088 22.8787   2
  -6  -4  -8 12.1146 25.0600   3
  -6   4  -8 -16.550 26.8018   3
  -7  -4  -8 28.1371 18.6123   2
  -7  -4  -8 31.7217 27.8515   3
   7  -4   8 12.2558 23.0453   2
  -7   4  -8 8.01382 28.8740   3
   8  -4   8 -15.482 21.4307   2
  -8  -4  -8 58.7864 30.6634   3
  -8   4  -8 22.9920 32.2860   3
  -9  -4  -8 -33.293 31.9794   3
  -9   4  -8 27.9813 34.2783   3
 -10  -4  -8 -6.9938 33.2197   3
 -10   4  -8 -32.069 33.3401   3
 -11  -4  -8 31.0718 37.8703   3
 -11   4  -8 31.8853 38.4886   3
 -12  -4  -8 44.2214 42.6535   3
 -12   4  -8 2.52645 37.8501   3
 -13  -5   8 31.6479 38.1088   3
  13  -5  -8 49.1129 36.8998   1
 -12  -5   8 -9.0792 35.6836   3
  12  -5  -8 16.4378 31.1603   1
 -11  -5   8 7.36935 38.7246   2
  11  -5  -8 -2.3828 29.8605   1
 -11  -5   8 11.6780 34.4173   3
 -10  -5   8 22.3957 33.6887   2
 -10  -5   8 41.7171 33.2591   3
  10  -5  -8 -50.336 26.0719   1
  -9  -5   8 6.22640 32.4275   3
   9  -5  -8 -14.623 26.1153   1
  -9  -5   8 -17.807 29.6444   2
  -8  -5   8 187.221 36.0765   2
   8  -5  -8 222.937 35.6807   1
  -7  -5   8 140.202 32.3636   2
   7  -5  -8 206.818 32.1950   1
  -6  -5   8 -1.1656 26.3990   2
   6  -5  -8 35.8917 25.9087   1
  -5  -5   8 130.615 31.3331   2
   5  -5  -8 170.447 30.6762   1
  -4  -5   8 639.047 57.4237   2
   4  -5  -8 642.577 51.4239   1
   3  -5  -8 9.20308 11.7203   3
  -3  -5   8 -33.569 24.0581   2
   3  -5  -8 14.8971 22.7829   1
   2  -5  -8 119.997 14.0386   3
   2  -5  -8 93.1791 14.5826   3
  -2  -5   8 131.180 31.2552   2
   2  -5  -8 105.952 26.4772   1
  -1  -5   8 144.202 32.3443   2
   1  -5  -8 135.390 27.1955   1
   1  -5  -8 135.458 16.7402   3
   1  -5  -8 108.597 16.1831   3
   0  -5  -8 32.6404 14.9649   3
   0  -5   8 33.9590 27.7280   2
   0  -5  -8 18.6320 23.8159   1
   1  -5   8 31.7961 27.4225   2
  -1  -5  -8 20.6065 16.8831   3
  -1  -5  -8 70.6338 23.2125   1
   2  -5   8 79.5809 29.9917   2
  -2  -5  -8 62.5365 20.8024   3
  -2  -5  -8 94.8229 25.8209   1
  -2   5  -8 86.4702 27.5448   3
  -3  -5  -8 -10.870 20.2704   3
  -3  -5  -8 80.8972 27.8725   1
   3  -5   8 -11.056 25.7677   2
  -3   5  -8 68.4310 28.3559   3
   4  -5   8 -24.702 25.7247   2
  -4  -5  -8 18.4236 25.2270   1
  -4  -5  -8 -12.987 21.3628   3
  -4   5  -8 -7.7857 26.2936   3
  -5  -5  -8 -17.495 23.1201   3
  -5  -5  -8 10.1541 26.5671   1
   5  -5   8 41.1336 26.5271   2
  -5   5  -8 -24.992 27.0372   3
  -6  -5  -8 188.653 32.6020   3
  -6  -5  -8 153.550 28.7362   2
  -6  -5  -8 205.642 34.2892   1
   6  -5   8 250.944 36.6955   2
  -6   5  -8 181.367 37.1681   3
  -7  -5  -8 509.348 45.5091   2
   7  -5   8 472.658 48.5122   2
  -7  -5  -8 502.893 50.2682   3
  -7   5  -8 535.182 54.9967   3
  -8  -5  -8 60.2307 33.3094   3
   8  -5   8 67.1160 27.3035   2
  -8   5  -8 0.77755 34.1925   3
  -9  -5  -8 11.7423 34.5245   3
  -9   5  -8 47.4558 38.0938   3
 -10  -5  -8 9.58319 35.7783   3
 -10   5  -8 20.7554 38.0168   3
 -11  -5  -8 57.6905 40.9275   3
 -11   5  -8 -1.5087 38.4574   3
 -12  -6   8 28.6600 48.2160   3
  12  -6  -8 5.55645 31.3450   1
  11  -6  -8 86.2994 33.2683   1
 -11  -6   8 16.1946 38.6182   3
  10  -6  -8 33.9719 29.3648   1
 -10  -6   8 21.2852 33.9078   2
 -10  -6   8 14.9823 38.2913   3
   9  -6  -8 19.4733 29.0522   1
  -9  -6   8 46.0677 38.0920   3
  -9  -6   8 14.8239 32.1937   2
  -8  -6   8 38.8833 29.6908   2
   8  -6  -8 -13.570 28.0283   1
  -7  -6   8 22.9812 27.2476   2
   7  -6  -8 8.93470 26.7035   1
   6  -6  -8 1.53833 26.4851   1
  -6  -6   8 16.9489 27.5170   2
   5  -6  -8 3.92019 24.5836   1
  -5  -6   8 -8.3976 27.9706   2
   4  -6  -8 23.1218 24.5266   1
  -4  -6   8 38.3231 27.8929   2
  -3  -6   8 -3.8605 29.4014   2
   3  -6  -8 63.8723 25.1126   1
   2  -6  -8 61.5053 26.8776   1
  -2  -6   8 84.9088 32.7271   2
   1  -6  -8 172.883 32.3551   1
  -1  -6   8 233.517 38.7966   2
   0  -6  -8 398.259 43.4029   1
   0  -6   8 428.650 49.5781   2
  -1  -6  -8 1545.72 99.2086   1
   1  -6   8 1596.30 104.619   2
  -2  -6  -8 544.898 49.4297   1
  -2  -6  -8 562.777 48.3397   3
   2  -6   8 597.396 55.4372   2
  -3  -6  -8 -19.056 21.2985   3
   3  -6   8 13.1475 31.3743   2
  -3  -6  -8 -26.213 23.5519   1
  -4  -6  -8 -12.978 23.0196   3
   4  -6   8 19.9702 28.1900   2
  -4  -6  -8 -7.8527 26.1494   1
  -4   6  -8 52.5182 32.0449   3
   5  -6   8 11.1878 30.7619   2
  -5  -6  -8 22.8783 27.9713   1
  -5  -6  -8 37.5043 27.8437   2
  -5  -6  -8 32.0411 25.4758   3
  -5   6  -8 15.2891 31.5780   3
   6  -6   8 -3.3882 30.1316   2
  -6  -6  -8 65.1660 28.5264   2
  -6  -6  -8 24.2346 27.9337   1
  -6  -6  -8 84.5926 29.0203   3
  -6   6  -8 -13.202 32.6263   3
  -7  -6  -8 17.8807 29.9671   3
  -7  -6  -8 -21.185 27.1302   1
   7  -6   8 22.2703 29.8979   2
  -7   6  -8 11.3727 35.8748   3
  -8  -6  -8 0.20336 27.8328   1
  -8  -6  -8 34.2982 32.9386   3
   8  -6   8 -38.080 27.6058   2
  -8   6  -8 4.07100 37.1919   3
  -9  -6  -8 -51.427 26.7913   1
  -9  -6  -8 3.60862 34.7956   3
  -9   6  -8 -11.762 37.6944   3
 -10  -6  -8 -13.496 36.2087   3
 -10   6  -8 -23.314 39.8109   3
  10  -7  -8 16.1077 30.8791   1
 -10  -7   8 65.0070 44.8149   3
 -10  -7   8 -21.078 33.8009   2
   9  -7  -8 -68.515 27.8246   1
  -9  -7   8 39.8003 32.3833   2
  -8  -7   8 6.09424 29.3395   2
   8  -7  -8 28.7044 30.5967   1
  -7  -7   8 21.7251 31.1059   2
   7  -7  -8 -41.857 27.1411   1
   6  -7  -8 1.14144 29.3213   1
  -6  -7   8 54.2704 30.7346   2
   5  -7  -8 32.9880 27.8605   1
  -5  -7   8 24.2210 32.4234   2
  -4  -7   8 13.5763 30.0144   2
   4  -7  -8 -6.8790 25.2528   1
  -3  -7   8 24.6355 30.3397   2
   3  -7  -8 23.0243 27.1658   1
   2  -7  -8 27.3089 26.7717   1
  -2  -7   8 -25.960 30.7108   2
   1  -7  -8 -7.6980 26.0239   1
  -1  -7   8 38.3024 34.2640   2
   0  -7   8 9.10128 30.7444   2
   0  -7  -8 75.0024 30.6731   1
  -1  -7  -8 11.7247 21.1887   3
   1  -7   8 16.8480 33.7883   2
  -1  -7  -8 19.1553 28.7883   1
  -2  -7  -8 7.19667 26.4902   1
  -2  -7  -8 -46.131 20.7595   3
   2  -7   8 -8.7613 32.4711   2
  -3  -7  -8 -4.6094 29.1689   2
   3  -7   8 9.85003 31.9314   2
  -3  -7  -8 -5.1213 22.5976   3
  -3  -7  -8 10.3583 27.8154   1
   4  -7   8 -26.842 30.5527   2
  -4  -7  -8 20.0188 29.2517   2
  -4  -7  -8 -21.339 26.4488   1
  -4  -7  -8 -9.9209 25.8691   3
   5  -7   8 38.7026 36.3864   2
  -5  -7  -8 -2.1475 26.2215   3
  -5  -7  -8 22.1170 28.3027   2
  -5  -7  -8 42.2954 30.6055   1
  -6  -7  -8 -36.867 27.4671   2
  -6  -7  -8 -13.716 27.4067   3
   6  -7   8 57.1521 35.5835   2
  -6  -7  -8 7.46148 29.6399   1
  -6   7  -8 41.7617 38.1256   3
  -7  -7  -8 53.1488 32.6354   3
  -7  -7  -8 6.07638 28.8998   1
   7  -7   8 25.0531 32.0985   2
  -7   7  -8 -14.737 37.0710   3
  -8  -7  -8 -42.931 28.7317   1
   8  -7   8 8.88898 32.2264   2
  -8  -7  -8 10.1993 34.4158   3
  -8   7  -8 6.37899 39.5680   3
  -9  -7  -8 46.7216 32.7141   1
  -9  -7  -8 -2.3030 37.0491   3
  -9   7  -8 -28.127 42.2047   3
  -8  -8   8 39.0612 33.5001   2
   8  -8  -8 -66.388 29.5424   1
   7  -8  -8 -29.562 30.5520   1
  -7  -8   8 -13.692 32.2046   2
  -6  -8   8 17.0371 32.6705   2
   6  -8  -8 -27.650 29.6055   1
   5  -8  -8 7.66502 28.4515   1
  -5  -8   8 24.6557 33.4848   2
  -4  -8   8 10.4804 33.9106   2
   4  -8  -8 20.3172 28.9462   1
  -3  -8   8 -36.162 34.2628   2
   3  -8  -8 28.3117 26.6055   1
   2  -8  -8 20.2333 28.4089   1
  -2  -8   8 -34.941 31.7247   2
  -1  -8   8 114.663 42.3359   2
   1  -8  -8 104.967 32.1991   1
   0  -8   8 108.677 38.7120   2
   0  -8  -8 109.949 33.6833   1
   0  -8  -8 100.653 37.1589   2
  -1  -8  -8 47.1457 29.9704   1
   1  -8   8 32.3663 38.8078   2
  -1  -8  -8 28.9784 32.0406   2
  -2  -8  -8 25.4670 32.4784   2
   2  -8   8 -32.523 32.7890   2
  -2  -8  -8 -12.292 30.4885   1
  -3  -8  -8 6.63836 32.9902   2
  -3  -8  -8 34.0992 31.3735   1
   3  -8   8 41.7668 38.7487   2
   4  -8   8 53.8973 40.2250   2
  -4  -8  -8 14.0546 30.2791   2
  -4  -8  -8 58.6140 31.2709   1
   5  -8   8 2.45403 36.2698   2
  -5  -8  -8 16.1230 30.5121   2
  -5  -8  -8 53.3990 31.3066   1
  -6  -8  -8 27.8869 29.6513   1
  -6  -8  -8 -20.034 35.8276   2
  -6  -8  -8 -52.283 36.3576   3
   6  -8   8 19.7123 37.4437   2
  -7  -8  -8 -9.5430 30.3309   1
   7  -8   8 -31.527 33.4986   2
  -7  -8  -8 -16.410 31.9116   3
  -5  -9   8 22.1677 37.7300   2
   5  -9  -8 -8.6730 32.8286   1
  -4  -9   8 -7.0913 34.1357   2
   4  -9  -8 6.92190 31.9807   1
   3  -9  -8 16.1453 34.6651   2
  -3  -9   8 -51.294 36.8155   2
   3  -9  -8 -13.529 29.7172   1
  -2  -9   8 -55.524 35.8464   2
   2  -9  -8 72.6092 39.2820   2
   2  -9  -8 35.5918 30.1915   1
   1  -9  -8 52.4511 38.5888   2
   1  -9  -8 47.1413 30.5184   1
  -1  -9   8 3.69694 41.1172   2
   0  -9   8 24.8184 42.2514   2
   0  -9  -8 98.6105 34.3638   1
   0  -9  -8 -4.2466 32.2879   2
  -1  -9  -8 5.82036 35.9558   2
  -1  -9  -8 -10.837 30.5427   1
   1  -9   8 33.8245 42.8967   2
  -2  -9  -8 25.8467 32.5569   1
   2  -9   8 -22.608 40.8344   2
  -2  -9  -8 3.82992 34.4215   2
  -3  -9  -8 30.3379 31.9155   1
  -3  -9  -8 4.26310 36.6333   2
   3  -9   8 -2.1683 39.3544   2
  15   0  -9 -36.067 29.5192   1
 -15   0   9 -31.486 30.1078   3
  14   0  -9 -16.284 30.5013   1
 -14   0   9 17.5824 30.7801   3
  13   0  -9 -23.956 27.6268   1
 -13   0   9 2.04968 27.4199   3
  12   0  -9 69.2900 25.9240   1
 -12   0   9 -17.153 23.6707   3
  11   0  -9 33.7794 23.8162   1
 -11   0   9 7.66851 22.5452   3
 -10   0   9 -1.6124 23.0304   2
  10   0  -9 18.2305 24.2748   1
 -10   0   9 6.25800 21.0400   3
  -9   0   9 6.97465 25.4994   2
  -9   0   9 -3.4200 19.2866   3
   9   0  -9 -31.764 20.1421   1
   8   0  -9 19.5942 18.5972   1
  -8   0   9 8.68496 17.6577   3
  -8   0   9 0.48496 24.7807   2
   7   0  -9 -9.9544 16.2796   1
  -7   0   9 4.74191 26.2385   2
  -7   0   9 -11.515 16.3395   3
   6   0  -9 -4.4423 17.1399   1
  -6   0   9 -0.4518 26.3503   2
  -6   0   9 37.5589 16.6258   3
   5   0  -9 -8.8449 17.3583   1
  -5   0   9 0.35572 26.9303   2
  -4   0   9 -9.0948 23.2581   2
   4   0  -9 18.5137 16.7731   1
   3   0  -9 -27.596 14.4221   1
  -3   0   9 -2.7232 24.4900   2
  -3   0   9 0.27581 11.1354   3
   2   0  -9 -10.839 14.1637   1
  -2   0   9 51.2437 31.8987   2
  -2   0   9 -2.2883 12.3085   1
  -2   0   9 -6.3679 11.8511   3
  -1   0   9 0.11771 12.7921   1
  -1   0   9 10.7621 13.2250   3
   1   0  -9 -7.4285 13.2074   1
  -1   0   9 -18.096 30.5838   2
   1   0  -9 -9.5244 13.3853   3
   0   0  -9 13.9255 15.0671   3
   0   0  -9 3.58144 13.9149   1
   0   0   9 -17.597 29.2904   2
   0   0   9 0.35279 13.9330   3
  -1   0  -9 -13.010 14.8726   1
  -1   0  -9 -12.017 15.4139   3
   1   0   9 -41.302 24.5806   2
  -2   0  -9 8.06117 16.5006   3
   2   0   9 13.8717 25.2148   2
  -3   0  -9 -22.699 18.0493   2
   3   0   9 -12.284 23.4420   2
  -3   0  -9 -29.646 16.7469   3
  -4   0  -9 -4.2536 15.2721   2
  -4   0  -9 -29.100 18.3150   3
   4   0   9 -0.1754 21.2698   2
  -5   0  -9 -6.6869 14.0443   2
   5   0   9 15.7404 18.3424   2
  -5   0  -9 7.66265 19.9922   3
  -6   0  -9 -4.2589 20.9329   3
  -6   0  -9 -0.3891 12.8458   2
   6   0   9 -6.0597 15.3062   2
  -7   0  -9 -30.187 22.7950   3
  -8   0  -9 -2.7557 25.3045   3
  -9   0  -9 -20.653 25.9444   3
 -10   0  -9 -5.5451 29.2313   3
 -11   0  -9 1.71423 31.2272   3
 -12   0  -9 -8.8664 34.2340   3
 -13   0  -9 41.9506 38.3789   3
  15  -1  -9 13.1158 34.2363   1
 -15  -1   9 35.9604 35.8157   3
 -14  -1   9 12.9474 30.2898   3
  14  -1  -9 -19.316 29.1884   1
  14   1  -9 -8.9832 27.2607   1
 -14   1   9 29.1101 30.5430   3
  13  -1  -9 79.0995 28.2518   1
 -13  -1   9 54.0605 30.7453   3
  13   1  -9 82.1511 31.2096   1
 -13   1   9 45.7080 28.4717   3
 -12  -1   9 42.7388 26.1145   2
 -12  -1   9 61.0686 28.6498   3
  12  -1  -9 44.6184 25.9431   1
 -12   1   9 39.0713 25.7626   3
  12   1  -9 35.2698 26.0743   1
 -11  -1   9 -16.030 24.5166   3
 -11  -1   9 3.34708 25.6396   2
  11  -1  -9 58.2540 27.1607   1
  11   1  -9 -28.566 20.3925   1
 -11   1   9 -35.749 21.4767   3
 -10  -1   9 -3.5411 22.1027   3
  10  -1  -9 3.44239 24.0382   1
 -10  -1   9 -5.4187 26.2305   2
 -10   1   9 25.1097 21.3529   3
  10   1  -9 5.56497 21.4761   1
   9  -1  -9 92.4078 26.0796   1
  -9  -1   9 74.1116 24.1344   3
  -9  -1   9 93.0470 31.6155   2
  -9   1   9 56.4685 20.2163   3
   9   1  -9 92.0846 21.6439   1
  -8  -1   9 520.103 50.7429   2
  -8  -1   9 482.340 41.5035   3
   8  -1  -9 498.969 42.3421   1
   8   1  -9 516.078 43.2662   1
  -8   1   9 511.055 40.7788   3
   7  -1  -9 786.595 57.3332   1
  -7  -1   9 908.509 71.1080   2
  -7  -1   9 762.240 58.3255   3
  -7   1   9 829.181 52.4552   3
   7   1  -9 868.002 54.0580   1
  -7   1   9 771.236 61.6600   2
   6  -1  -9 91.2116 22.6680   1
  -6  -1   9 154.721 36.9627   2
  -6   1   9 142.500 27.1919   2
  -6   1   9 88.6705 15.4602   3
   6   1  -9 86.3988 18.7892   1
  -5  -1   9 62.2040 34.4461   2
   5  -1  -9 109.276 21.7778   1
   5   1  -9 107.973 17.9050   1
  -5   1   9 84.9118 13.6131   3
  -5   1   9 81.5611 24.2425   2
  -4  -1   9 127.315 33.8416   2
   4  -1  -9 186.107 22.8522   1
  -4  -1   9 164.914 18.3247   1
  -4   1   9 202.545 30.2974   2
   4   1  -9 197.785 20.1070   1
  -4   1   9 150.716 15.2799   3
   3  -1  -9 126.026 20.6975   1
  -3  -1   9 135.935 32.5239   2
  -3  -1   9 93.1532 14.1058   1
   3   1  -9 111.158 16.5702   1
  -3   1   9 103.850 26.4603   2
  -3   1   9 107.760 12.0923   3
  -2  -1   9 23.0197 11.4406   1
  -2  -1   9 18.2157 26.1862   2
   2  -1  -9 27.5085 17.0671   1
  -2   1   9 32.4954 10.1246   3
  -2   1   9 -22.911 25.3302   2
   2   1  -9 17.2909 13.6016   1
  -1  -1   9 1.58519 26.7715   2
   1  -1  -9 18.1093 11.6394   3
   1  -1  -9 -14.765 15.1211   1
  -1   1   9 22.9645 26.5786   2
   1   1  -9 0.89591 11.7775   1
   1   1  -9 -27.706 15.1995   3
  -1   1   9 -0.1927 11.2794   3
   0  -1  -9 27.3299 16.7260   1
   0  -1   9 17.6880 26.7844   2
   0  -1  -9 35.0026 13.3383   3
   0   1  -9 47.4123 18.2441   3
   0   1   9 36.9948 26.4916   2
   0   1   9 31.4699 13.9872   3
   0   1  -9 16.4378 11.9709   1
  -1  -1  -9 38.6966 14.8331   3
  -1  -1  -9 26.0498 17.1318   1
   1  -1   9 52.7072 27.0147   2
  -1   1  -9 12.3051 18.2591   3
   1   1   9 48.1960 15.6077   3
  -1   1  -9 40.9663 13.7490   1
   1   1   9 26.5185 23.4048   2
   2  -1   9 148.971 29.4862   2
  -2  -1  -9 148.185 21.8838   1
  -2  -1  -9 155.087 20.2851   3
  -2   1  -9 179.153 24.2379   3
   2   1   9 158.879 26.2864   2
  -3  -1  -9 -39.097 22.5377   2
   3  -1   9 -9.7952 23.4179   2
  -3  -1  -9 8.83169 17.0704   3
   3   1   9 23.7039 19.5974   2
  -3   1  -9 -8.7274 18.7702   3
   4  -1   9 6.38645 23.5543   2
  -4  -1  -9 24.2949 18.5663   3
  -4  -1  -9 24.4153 21.3676   2
  -4   1  -9 -11.559 19.3890   3
  -5  -1  -9 28.8430 20.6030   3
   5  -1   9 21.3364 24.6177   2
  -5  -1  -9 18.1762 17.8938   2
  -5   1  -9 12.6772 20.7297   3
  -5   1  -9 17.8115 15.6134   2
  -6  -1  -9 25.0062 22.6140   3
  -6  -1  -9 33.4133 14.6067   2
   6  -1   9 44.8144 24.9287   2
  -6   1  -9 -5.7088 21.7353   3
  -6   1  -9 48.4066 15.0698   2
  -7  -1  -9 1026.03 75.5800   3
   7  -1   9 1137.05 69.5384   2
  -7   1  -9 1045.69 76.7182   3
  -8  -1  -9 173.307 32.3929   3
  -8   1  -9 95.2273 29.8959   3
  -9  -1  -9 106.603 30.8888   3
  -9   1  -9 111.529 31.7486   3
 -10  -1  -9 16.8276 30.2317   3
 -10   1  -9 7.00413 30.5246   3
 -11  -1  -9 -57.367 30.2321   3
 -11   1  -9 7.73379 32.3836   3
 -12  -1  -9 2.41950 34.2384   3
 -12   1  -9 -39.122 32.3241   3
 -13  -1  -9 22.9828 38.9457   3
 -13   1  -9 -35.607 35.2631   3
  15  -2  -9 82.9834 35.4188   1
 -15  -2   9 105.798 37.0107   3
  14  -2  -9 -30.195 31.5056   1
 -14  -2   9 47.9896 34.2394   3
  13  -2  -9 17.9283 26.9487   1
 -13  -2   9 4.58087 30.0676   3
 -12  -2   9 47.9531 28.6414   3
 -12  -2   9 -27.741 26.2159   2
  12  -2  -9 13.2228 30.4653   1
 -12   2   9 0.18610 25.9770   3
  12   2  -9 28.2144 24.5452   1
  11  -2  -9 27.5714 25.5376   1
 -11  -2   9 -13.502 26.3157   3
 -11  -2   9 12.9653 29.0867   2
 -11   2   9 14.7745 24.6402   3
  11   2  -9 -3.7314 22.0154   1
 -10  -2   9 26.6690 25.8604   3
 -10  -2   9 31.9503 33.4898   2
  10  -2  -9 -14.307 25.2311   1
  10   2  -9 6.83160 22.7633   1
 -10   2   9 21.5950 22.3705   3
  -9  -2   9 34.3596 34.6640   2
   9  -2  -9 -8.0597 23.3936   1
  -9  -2   9 36.1370 24.4504   3
   9   2  -9 15.6182 18.9633   1
  -9   2   9 67.0420 22.1108   3
  -8  -2   9 -16.706 22.4965   3
  -8  -2   9 30.2473 37.5200   2
   8  -2  -9 -4.5085 21.3474   1
  -8   2   9 -37.304 16.9379   3
   8   2  -9 -15.252 17.3907   1
  -7  -2   9 -6.2114 32.0991   2
   7  -2  -9 33.4683 20.0381   1
   7   2  -9 3.69467 15.4760   1
  -7   2   9 0.13183 15.6016   3
  -6  -2   9 -22.863 29.5052   2
   6  -2  -9 -39.099 20.7907   1
   6   2  -9 3.57170 13.9839   1
  -6   2   9 -18.022 12.6029   3
   5  -2  -9 30.8462 20.9444   1
  -5  -2   9 19.3508 12.3988   1
  -5  -2   9 -27.985 27.2746   2
   5   2  -9 12.3225 12.8067   1
  -4  -2   9 18.5733 26.5580   2
   4  -2  -9 38.3071 19.9558   1
  -4  -2   9 0.55772 10.8759   1
   4   2  -9 14.3093 11.3902   1
  -3  -2   9 234.494 33.3912   2
   3  -2  -9 296.213 30.1473   1
  -3  -2   9 267.770 21.5436   1
   3   2  -9 279.004 20.7190   1
  -2  -2   9 109.668 27.5211   2
  -2  -2   9 115.626 12.5774   1
   2  -2  -9 134.414 20.9650   1
   2   2  -9 113.157 13.0828   1
  -1  -2   9 841.527 57.7779   2
   1  -2  -9 842.673 53.3273   1
  -1   2   9 766.695 43.5037   3
   1   2  -9 704.653 44.4644   1
   0  -2   9 1265.07 79.5266   2
   0  -2  -9 1234.64 76.6916   1
   0  -2  -9 1252.32 70.2372   3
   0   2  -9 1214.57 69.4622   1
   0   2  -9 1290.78 78.3946   3
   0   2   9 1340.11 70.7830   3
  -1  -2  -9 -3.3344 12.5579   3
   1  -2   9 35.3357 22.2630   2
  -1  -2  -9 4.42173 16.8488   1
   1   2   9 7.79967 13.5122   3
  -1   2  -9 -20.153 18.1601   3
  -2  -2  -9 580.604 45.4570   1
  -2  -2  -9 546.390 38.7802   3
   2  -2   9 509.096 44.0332   2
  -2   2  -9 529.065 46.6319   3
   3  -2   9 24.6502 19.7844   2
  -3  -2  -9 50.9780 16.9888   3
  -3   2  -9 18.0360 21.5949   3
   4  -2   9 24.0313 19.8500   2
  -4  -2  -9 5.78144 18.0732   3
  -4   2  -9 -3.0693 21.5325   3
  -5  -2  -9 -3.8552 20.4411   3
  -5  -2  -9 5.79174 21.1638   2
   5  -2   9 40.1439 19.7442   2
  -5   2  -9 94.0041 26.3768   3
  -6  -2  -9 -35.945 20.7899   2
  -6  -2  -9 37.1346 23.5523   3
   6  -2   9 2.73551 18.8041   2
  -6   2  -9 -8.0411 23.4890   3
  -7  -2  -9 14.8580 25.0470   3
   7  -2   9 15.0630 18.8944   2
  -7   2  -9 -33.210 23.4090   3
  -8  -2  -9 11.9875 27.2010   3
  -8   2  -9 41.6243 28.2342   3
  -9  -2  -9 -3.8830 29.2828   3
  -9   2  -9 -24.247 28.0091   3
 -10  -2  -9 -14.224 31.2426   3
 -10   2  -9 -10.450 29.5738   3
 -11  -2  -9 52.1849 35.9580   3
 -11   2  -9 35.4426 35.0134   3
 -12  -2  -9 -13.709 36.6398   3
 -12   2  -9 -14.650 34.8791   3
 -13  -2  -9 -14.907 40.5682   3
 -13   2  -9 -33.324 37.2641   3
 -14  -3   9 5.18778 33.1587   3
  14  -3  -9 -6.7539 32.6687   1
 -13  -3   9 -13.648 30.8282   3
  13  -3  -9 -31.963 31.0457   1
 -12  -3   9 -14.503 33.4847   2
 -12  -3   9 3.61775 30.6119   3
  12  -3  -9 -14.075 29.6182   1
 -11  -3   9 17.7473 37.9970   2
 -11  -3   9 68.7606 31.2835   3
  11  -3  -9 -33.538 27.8870   1
 -10  -3   9 -38.829 24.8520   3
 -10  -3   9 -64.572 39.1277   2
  10  -3  -9 -6.4573 25.4015   1
 -10   3   9 -12.863 26.4469   3
  -9  -3   9 -44.235 24.7530   3
  -9  -3   9 -20.478 37.1995   2
   9  -3  -9 24.3071 26.7495   1
  -9   3   9 -24.880 18.6679   3
  -8  -3   9 -11.256 33.0196   2
   8  -3  -9 25.8587 25.6206   1
  -8   3   9 22.7983 17.4362   3
   8   3  -9 32.3695 18.3343   1
  -7  -3   9 76.1604 31.2181   2
   7  -3  -9 21.8393 22.6194   1
  -7   3   9 19.5353 13.3010   3
   7   3  -9 -2.6141 14.9478   1
   6  -3  -9 186.726 29.2534   1
  -6  -3   9 145.456 22.1207   1
  -6  -3   9 204.996 35.9403   2
   6   3  -9 213.464 20.9461   1
  -5  -3   9 158.130 31.1646   2
  -5  -3   9 172.193 16.5602   1
   5  -3  -9 155.714 26.8941   1
   5   3  -9 184.373 17.7822   1
  -4  -3   9 4.71985 9.31603   1
  -4  -3   9 47.7183 24.8393   2
   4  -3  -9 31.9509 20.7789   1
   4   3  -9 24.2540 10.0959   1
  -3  -3   9 10.7159 23.7678   2
  -3  -3   9 17.6836 7.20444   1
   3  -3  -9 33.5847 18.0759   1
   3   3  -9 13.7757 7.68050   1
  -2  -3   9 18.0535 20.9327   2
   2  -3  -9 48.7268 21.0909   1
  -1  -3   9 31.0670 20.5093   2
   1  -3  -9 1.34217 18.5979   1
   0  -3  -9 15.6439 19.9934   1
   0  -3  -9 -0.2878 11.2497   3
   0  -3   9 26.0143 21.5988   2
   0   3  -9 22.5072 7.36880   1
   0   3  -9 2.64510 6.94098   1
   1  -3   9 15.9392 21.0465   2
  -1  -3  -9 -8.8568 19.8360   1
  -1  -3  -9 33.2220 13.8784   3
  -1   3  -9 0.45066 20.6103   3
  -1   3  -9 6.08728 9.17643   1
  -2  -3  -9 18.6319 21.3106   1
  -2  -3  -9 9.01233 15.2344   3
   2  -3   9 35.4268 20.8935   2
  -2   3  -9 15.7672 11.5127   1
  -2   3  -9 27.9375 21.5449   3
  -3  -3  -9 184.277 28.0947   1
  -3  -3  -9 136.668 21.6017   3
   3  -3   9 163.704 27.3532   2
  -3   3  -9 127.988 27.3075   3
  -4  -3  -9 32.2970 19.3952   3
   4  -3   9 56.8327 21.3543   2
  -4   3  -9 21.7934 23.8635   3
  -5  -3  -9 38.1647 21.9497   3
   5  -3   9 20.0784 20.7031   2
  -5   3  -9 22.8470 24.9886   3
   6  -3   9 46.2936 22.2408   2
  -6  -3  -9 91.7128 26.4036   3
  -6   3  -9 63.5392 28.0947   3
   7  -3   9 23.1151 20.4626   2
  -7  -3  -9 30.3579 26.4671   3
  -7   3  -9 55.5265 29.0566   3
   8  -3   9 -2.8315 21.6108   2
  -8  -3  -9 12.4056 29.0022   3
  -8   3  -9 -54.963 27.4577   3
  -9  -3  -9 19.7007 32.4094   3
  -9   3  -9 83.0234 34.7310   3
 -10  -3  -9 -9.0983 33.9128   3
 -10   3  -9 31.2998 35.0252   3
 -11  -3  -9 13.7410 35.9714   3
 -11   3  -9 20.1636 35.9467   3
 -12  -3  -9 -25.582 38.1866   3
 -12   3  -9 -47.533 34.9690   3
 -14  -4   9 -10.159 34.5573   3
 -13  -4   9 -23.598 33.1131   3
  13  -4  -9 -25.325 30.9073   1
 -12  -4   9 12.4923 32.9808   3
  12  -4  -9 42.2339 32.6185   1
 -11  -4   9 180.983 49.8051   2
  11  -4  -9 260.719 40.8187   1
 -11  -4   9 213.947 39.9959   3
  10  -4  -9 50.3278 27.6269   1
 -10  -4   9 29.3648 37.0465   2
 -10  -4   9 81.9728 33.2912   3
  -9  -4   9 1.99555 34.2452   2
   9  -4  -9 8.63583 24.3963   1
  -9  -4   9 -4.3468 28.6523   3
   8  -4  -9 60.8634 26.6927   1
  -8  -4   9 33.5304 31.6803   2
   7  -4  -9 46.6361 25.2823   1
  -7  -4   9 17.8478 29.0066   2
   6  -4  -9 17.2397 24.9509   1
  -6  -4   9 20.4620 27.2786   2
   5  -4  -9 157.964 28.3506   1
  -5  -4   9 139.269 30.4913   2
  -5  -4   9 120.068 13.3582   1
  -4  -4   9 191.968 32.3651   2
   4  -4  -9 169.287 28.0508   1
   3  -4  -9 4.92699 21.9961   1
  -3  -4   9 11.3789 23.6766   2
   2  -4  -9 46.4725 23.0404   1
  -2  -4   9 79.8319 24.4760   2
  -1  -4   9 474.319 44.0918   2
   1  -4  -9 386.054 37.8270   1
   0  -4  -9 1539.74 91.2098   1
   0  -4   9 1398.29 92.6370   2
   0  -4  -9 1473.51 81.6282   3
  -1  -4  -9 144.275 26.6514   1
   1  -4   9 124.538 27.1321   2
  -1  -4  -9 137.029 19.1675   3
  -1   4  -9 116.344 10.7057   1
  -1   4  -9 111.717 27.2873   3
   2  -4   9 52.6790 26.6501   2
  -2  -4  -9 32.9606 17.5425   3
  -2  -4  -9 61.6660 23.5788   1
  -2   4  -9 81.1464 12.8877   1
  -2   4  -9 83.9265 26.7979   3
  -3  -4  -9 22.1350 24.2214   1
  -3  -4  -9 -7.0931 17.5375   3
   3  -4   9 22.3607 24.5439   2
  -3   4  -9 32.6135 25.6803   3
  -3   4  -9 12.3254 12.6945   1
  -4  -4  -9 14.7745 25.0509   1
  -4  -4  -9 33.5518 20.8631   3
   4  -4   9 12.6278 22.8579   2
  -4   4  -9 18.3236 25.5854   3
  -5  -4  -9 23.6858 24.2503   1
   5  -4   9 -23.881 21.3212   2
  -5  -4  -9 44.6192 22.8133   3
  -5   4  -9 -15.542 27.2414   3
  -6  -4  -9 -6.0469 24.1402   3
   6  -4   9 -7.7534 23.2646   2
  -6   4  -9 -9.7863 27.7871   3
   7  -4   9 14.8591 23.7013   2
  -7  -4  -9 29.8483 19.7258   2
  -7  -4  -9 36.1425 28.0273   3
  -7   4  -9 -35.155 28.5618   3
  -8  -4  -9 9.85210 30.5352   3
   8  -4   9 3.46621 22.2535   2
  -8   4  -9 32.4061 32.8753   3
  -9  -4  -9 -33.655 30.9083   3
  -9   4  -9 21.5135 34.7899   3
 -10  -4  -9 -21.535 33.8863   3
 -10   4  -9 -23.747 34.4716   3
 -11  -4  -9 -11.530 36.8931   3
 -11   4  -9 28.1563 36.8678   3
 -12  -4  -9 1.03593 40.7153   3
 -12   4  -9 -24.402 38.7477   3
  13  -5  -9 -47.472 31.7890   1
 -13  -5   9 -34.957 33.6044   3
  12  -5  -9 81.9250 33.9775   1
 -12  -5   9 64.3219 37.7612   3
  11  -5  -9 18.8282 30.5108   1
 -11  -5   9 16.9946 33.5154   3
 -11  -5   9 8.08997 37.5857   2
 -10  -5   9 170.848 39.0541   3
  10  -5  -9 115.365 32.1026   1
 -10  -5   9 147.174 42.4125   2
   9  -5  -9 179.258 33.9116   1
  -9  -5   9 178.273 40.0360   2
   8  -5  -9 193.718 34.8889   1
  -8  -5   9 225.685 38.1606   2
   7  -5  -9 89.1960 29.0319   1
  -7  -5   9 83.1781 30.3724   2
  -6  -5   9 40.2840 28.4988   2
   6  -5  -9 62.5906 27.2414   1
   5  -5  -9 131.868 28.1707   1
  -5  -5   9 143.732 31.7408   2
  -4  -5   9 56.5508 27.8812   2
   4  -5  -9 56.2017 26.2135   1
   3  -5  -9 0.54530 24.4079   1
  -3  -5   9 2.19922 23.9923   2
  -2  -5   9 9.58609 25.1938   2
   2  -5  -9 68.9681 24.8129   1
   1  -5  -9 20.5358 12.9573   3
  -1  -5   9 14.1779 27.1447   2
   1  -5  -9 22.1070 21.4088   3
   1  -5  -9 14.3198 24.8034   1
   0  -5  -9 32.2221 15.1314   3
   0  -5   9 -17.369 26.6440   2
   0  -5  -9 -12.018 24.3771   1
  -1  -5  -9 84.7293 26.9341   1
  -1  -5  -9 129.992 20.6343   3
   1  -5   9 106.818 31.6695   2
  -2  -5  -9 32.8980 25.0081   1
  -2  -5  -9 16.5119 18.8852   3
   2  -5   9 26.6599 26.4544   2
  -2   5  -9 72.3910 27.5079   3
  -3  -5  -9 71.5037 27.3188   1
  -3  -5  -9 75.4464 23.0961   3
   3  -5   9 114.888 31.4239   2
  -3   5  -9 137.540 31.9607   3
  -4  -5  -9 144.400 31.4168   1
   4  -5   9 105.696 31.3466   2
  -4  -5  -9 105.972 24.9517   3
  -4   5  -9 86.8103 31.8120   3
  -5  -5  -9 6.17219 26.3124   1
  -5  -5  -9 35.1323 24.4530   3
   5  -5   9 -24.851 26.2050   2
  -5   5  -9 57.9818 30.3956   3
   6  -5   9 35.1449 27.5919   2
  -6  -5  -9 -9.5110 25.7964   1
  -6  -5  -9 -18.836 24.5987   3
  -6  -5  -9 20.9485 23.1706   2
  -6   5  -9 19.9756 30.7704   3
  -7  -5  -9 141.433 32.8150   3
   7  -5   9 91.5021 30.7455   2
  -7  -5  -9 63.9494 29.0120   1
  -7   5  -9 101.912 36.8767   3
  -8  -5  -9 1.44872 30.4868   3
   8  -5   9 -27.810 24.7527   2
  -8   5  -9 -1.2892 34.6338   3
  -9  -5  -9 86.9169 37.1574   3
  -9   5  -9 53.4315 39.4102   3
 -10  -5  -9 -9.0313 36.4665   3
 -10   5  -9 78.8411 40.4325   3
 -11  -5  -9 17.0149 37.5992   3
 -11   5  -9 81.8395 41.8685   3
  12  -6  -9 -10.088 31.7939   1
 -11  -6   9 -62.530 34.1424   2
  11  -6  -9 -34.058 29.5078   1
 -11  -6   9 29.1153 37.2070   3
 -10  -6   9 -23.570 33.5435   2
  10  -6  -9 21.4811 29.1948   1
 -10  -6   9 48.4591 37.6139   3
  -9  -6   9 -16.130 30.9353   2
   9  -6  -9 -32.232 27.7628   1
   8  -6  -9 -39.024 27.6645   1
  -8  -6   9 -28.016 26.4107   2
   7  -6  -9 4.11154 28.1382   1
  -7  -6   9 0.91589 28.9880   2
  -6  -6   9 -43.714 25.7493   2
   6  -6  -9 13.2541 27.2728   1
   5  -6  -9 21.2393 26.3094   1
  -5  -6   9 -8.5600 27.9153   2
  -4  -6   9 112.242 32.6421   2
   4  -6  -9 125.167 30.2235   1
   3  -6  -9 10.3712 25.4420   1
  -3  -6   9 20.2646 30.9102   2
   2  -6  -9 16.3255 26.5012   1
  -2  -6   9 70.9241 31.8513   2
   1  -6  -9 17.5297 19.7784   3
  -1  -6   9 13.3916 30.7398   2
   1  -6  -9 5.47322 26.4073   1
   0  -6  -9 37.0751 17.8865   3
   0  -6  -9 6.21268 27.7319   1
   0  -6   9 -1.1069 27.6910   2
   1  -6   9 138.083 35.9171   2
  -1  -6  -9 123.776 29.8536   1
  -1  -6  -9 89.4706 21.2204   3
  -2  -6  -9 472.958 46.5549   1
   2  -6   9 470.405 50.5588   2
  -2  -6  -9 465.569 39.5144   3
  -3  -6  -9 26.4417 26.3949   1
  -3  -6  -9 -24.495 21.5105   3
   3  -6   9 116.315 34.6196   2
  -4  -6  -9 18.7959 23.7189   3
   4  -6   9 -15.457 30.1495   2
  -4  -6  -9 46.4848 29.8925   1
  -4   6  -9 34.3518 32.5622   3
  -5  -6  -9 -5.7020 25.6007   3
   5  -6   9 -10.963 28.4947   2
  -5  -6  -9 8.19199 28.4219   1
  -5  -6  -9 21.7966 27.0157   2
  -5   6  -9 -0.9014 32.4285   3
  -6  -6  -9 14.7209 26.2868   3
  -6  -6  -9 42.9416 27.3714   2
   6  -6   9 20.9015 30.4445   2
  -6  -6  -9 80.3600 30.3857   1
  -6   6  -9 -21.743 33.2733   3
  -7  -6  -9 55.9243 31.0472   3
  -7  -6  -9 10.0538 28.7740   1
   7  -6   9 39.9549 31.7736   2
  -7   6  -9 32.3499 36.4832   3
  -8  -6  -9 84.1233 34.9324   3
   8  -6   9 45.9281 30.2581   2
  -8  -6  -9 59.7414 30.7207   1
  -8   6  -9 50.6989 38.3473   3
  -9  -6  -9 30.4102 30.8124   1
  -9  -6  -9 44.8914 38.0670   3
  -9   6  -9 -4.9991 38.8328   3
 -10  -6  -9 33.0681 40.5098   3
 -10  -6  -9 10.7252 30.7819   1
 -10   6  -9 99.1241 44.9494   3
  10  -7  -9 46.0622 31.2419   1
 -10  -7   9 118.869 48.7935   3
 -10  -7   9 41.9261 37.2332   2
   9  -7  -9 67.8300 32.8504   1
  -9  -7   9 26.0467 35.1612   2
  -8  -7   9 -3.0027 30.3544   2
   8  -7  -9 -76.557 30.4281   1
   7  -7  -9 118.128 35.3997   1
  -7  -7   9 128.754 35.1652   2
   6  -7  -9 19.8087 29.9833   1
  -6  -7   9 67.5746 33.2670   2
  -5  -7   9 54.3740 32.8473   2
   5  -7  -9 41.0749 28.6774   1
  -4  -7   9 141.454 38.9389   2
   4  -7  -9 177.159 34.1091   1
   3  -7  -9 112.507 31.5201   1
  -3  -7   9 78.2725 36.5338   2
   2  -7  -9 -13.986 27.9579   1
  -2  -7   9 -11.531 29.8779   2
  -1  -7   9 -13.480 32.8912   2
   1  -7  -9 -24.337 27.7591   1
   0  -7   9 -9.2201 30.6933   2
   0  -7  -9 -30.568 28.9173   1
   1  -7   9 55.5112 36.7215   2
  -1  -7  -9 -30.022 28.0791   1
   2  -7   9 70.0977 34.7354   2
  -2  -7  -9 35.6820 27.9496   1
   3  -7   9 73.5737 36.8186   2
  -3  -7  -9 83.1638 30.5269   1
  -3  -7  -9 48.2721 25.4542   3
  -4  -7  -9 19.6281 29.7897   1
  -4  -7  -9 22.5246 25.8346   3
   4  -7   9 74.2780 36.8284   2
  -4  -7  -9 8.23234 28.6776   2
  -5  -7  -9 29.4605 27.6791   3
  -5  -7  -9 37.4454 30.7427   1
   5  -7   9 21.1394 33.5123   2
  -5  -7  -9 26.8579 29.9500   2
  -5   7  -9 24.7634 36.3282   3
  -6  -7  -9 45.7886 31.8573   1
  -6  -7  -9 -39.938 27.6055   3
   6  -7   9 -2.7996 31.8720   2
  -6  -7  -9 -3.1990 27.9733   2
  -6   7  -9 35.4848 37.9648   3
   7  -7   9 265.370 44.3629   2
  -7  -7  -9 156.839 38.2294   1
  -7  -7  -9 245.977 39.5574   3
  -7   7  -9 99.5197 45.4719   3
  -8  -7  -9 93.5221 34.3365   1
  -8  -7  -9 138.316 38.2746   3
  -8   7  -9 92.6771 44.0148   3
  -8  -8   9 -17.532 32.8996   2
   8  -8  -9 -70.721 30.7486   1
  -7  -8   9 45.8611 36.2389   2
   7  -8  -9 -0.5489 32.9541   1
   6  -8  -9 4.28323 31.8624   1
  -6  -8   9 -3.4806 35.1827   2
  -5  -8   9 40.1621 36.1481   2
   5  -8  -9 -28.751 28.3059   1
  -4  -8   9 25.2817 37.2534   2
   4  -8  -9 3.02320 29.4059   1
   3  -8  -9 92.7018 31.8812   1
  -3  -8   9 71.4920 36.3825   2
   2  -8  -9 110.886 32.9094   1
  -2  -8   9 51.5066 35.3694   2
   1  -8  -9 78.7068 32.8992   1
  -1  -8   9 110.882 42.0704   2
   0  -8  -9 38.0188 31.7927   1
   0  -8   9 -39.188 36.5046   2
  -1  -8  -9 19.7562 33.1924   2
  -1  -8  -9 -5.7522 30.8417   1
   1  -8   9 0.02303 36.5452   2
  -2  -8  -9 43.6089 34.0080   2
   2  -8   9 29.4756 38.3062   2
  -2  -8  -9 77.6276 34.4842   1
   3  -8   9 23.6866 35.9845   2
  -3  -8  -9 -16.726 29.6894   2
  -3  -8  -9 73.5265 35.5015   1
   4  -8   9 14.5295 35.9064   2
  -4  -8  -9 -6.9730 31.8098   2
  -4  -8  -9 30.7709 30.0597   1
  -5  -8  -9 25.8684 31.0111   1
  -5  -8  -9 7.18858 30.9357   2
   5  -8   9 -16.308 36.5739   2
  -6  -8  -9 -18.797 29.3809   1
   6  -8   9 -6.7772 36.6047   2
   4  -9  -9 76.8218 33.2795   1
  -3  -9   9 19.6769 56.3629   2
   3  -9  -9 -3.7005 31.1076   1
   2  -9  -9 15.7656 35.8500   2
   2  -9  -9 40.9112 33.3023   1
  -2  -9   9 1.99153 44.3283   2
   1  -9  -9 24.7808 31.6879   1
   1  -9  -9 28.6370 38.9966   2
  -1  -9   9 -17.584 37.1093   2
   0  -9   9 -31.227 35.6480   2
   0  -9  -9 60.2895 36.1292   2
   0  -9  -9 20.4930 34.3094   1
  -1  -9  -9 11.2969 33.9172   1
  -1  -9  -9 107.055 38.5432   2
   1  -9   9 -1.2655 45.3807   2
  -2  -9  -9 111.685 38.3880   1
  -2  -9  -9 24.8150 35.4986   2
   2  -9   9 71.7986 59.4327   2
  15   0 -10 116.924 36.8481   1
 -15   0  10 173.900 39.6010   3
  14   0 -10 96.9035 33.4258   1
 -14   0  10 99.7842 34.4280   3
 -13   0  10 -10.953 27.2323   3
  13   0 -10 44.1867 26.7501   1
 -12   0  10 96.2685 29.1433   3
  12   0 -10 117.206 30.6257   1
 -11   0  10 19.7010 23.2286   3
 -11   0  10 -9.2474 24.5939   2
  11   0 -10 21.9364 23.5105   1
 -10   0  10 -13.628 25.2328   2
 -10   0  10 -15.170 20.2000   3
  10   0 -10 -20.254 22.5131   1
   9   0 -10 16.4267 22.9244   1
  -9   0  10 -12.135 18.4989   3
  -9   0  10 -24.858 26.0919   2
  -8   0  10 13.9500 28.3909   2
  -8   0  10 7.54723 17.3504   3
   8   0 -10 15.5946 21.0426   1
  -7   0  10 42.4397 17.6897   3
  -7   0  10 79.0726 29.1000   2
   7   0 -10 63.0988 21.6523   1
  -6   0  10 36.7634 29.1961   2
  -6   0  10 2.49387 15.8084   3
   6   0 -10 48.6097 20.8617   1
  -5   0  10 -9.1575 26.0808   2
   5   0 -10 4.03302 16.7761   1
  -4   0  10 714.253 61.0595   2
   4   0 -10 678.287 47.1597   1
  -3   0  10 33.0431 12.9236   3
  -3   0  10 7.26283 29.8790   2
   3   0 -10 45.9056 16.5343   1
  -2   0  10 140.335 31.9011   2
  -2   0  10 134.633 17.0126   3
   2   0 -10 82.6634 17.9779   1
  -1   0  10 11.9447 31.5368   2
   1   0 -10 3.19132 14.0714   1
   1   0 -10 16.0023 14.7029   3
  -1   0  10 8.35636 13.6385   3
   0   0  10 602.044 44.4016   3
   0   0  10 703.532 59.4192   2
   0   0 -10 609.185 44.0840   1
   0   0 -10 678.940 45.1932   3
   1   0  10 149.759 34.0547   2
  -1   0 -10 102.760 20.2471   3
  -1   0 -10 125.232 19.4019   1
   2   0  10 365.469 40.3175   2
  -2   0 -10 339.230 31.0005   3
   3   0  10 6.76006 24.6044   2
  -3   0 -10 6.03800 18.0445   3
  -4   0 -10 -30.824 18.5921   3
   4   0  10 -1.0961 22.3634   2
  -5   0 -10 130.249 25.8598   3
   5   0  10 131.464 23.6630   2
  -5   0 -10 106.653 19.7544   2
   6   0  10 79.1507 19.7745   2
  -6   0 -10 67.4355 17.0075   2
  -6   0 -10 71.6388 25.4446   3
  -7   0 -10 -10.309 23.7586   3
  -8   0 -10 59.4817 28.7150   3
  -9   0 -10 30.8196 29.4320   3
 -10   0 -10 309.619 43.6528   3
 -11   0 -10 250.724 43.2814   3
 -12   0 -10 -29.271 32.8734   3
 -13   0 -10 99.1668 44.8227   3
 -15  -1  10 42.7829 34.7209   3
  15  -1 -10 56.3161 34.7005   1
  15   1 -10 -2.0988 29.7781   1
 -14  -1  10 42.3833 32.4446   3
  14  -1 -10 0.49797 28.5507   1
  14   1 -10 3.40290 26.8021   1
  13  -1 -10 -1.8122 28.7169   1
 -13  -1  10 19.7539 28.6718   3
 -13   1  10 3.91117 25.4012   3
  13   1 -10 23.8804 28.3906   1
 -12  -1  10 25.4704 29.0753   2
  12  -1 -10 45.7981 28.3117   1
 -12  -1  10 11.8604 26.8072   3
  12   1 -10 37.1536 26.8057   1
 -12   1  10 33.7502 26.1914   3
 -11  -1  10 189.154 34.9332   2
 -11  -1  10 180.044 31.8024   3
  11  -1 -10 202.585 35.2311   1
 -11   1  10 211.046 30.6903   3
  11   1 -10 234.699 33.4485   1
 -10  -1  10 813.298 61.0833   3
  10  -1 -10 674.041 60.3564   1
 -10  -1  10 835.515 64.7963   2
  10   1 -10 732.459 58.9624   1
 -10   1  10 762.251 57.2940   3
   9  -1 -10 1099.71 73.3042   1
  -9  -1  10 1029.16 80.0359   2
  -9  -1  10 1112.54 73.8033   3
  -9   1  10 1050.10 69.5128   3
   9   1 -10 1129.55 70.8034   1
  -8  -1  10 429.424 37.9193   3
  -8  -1  10 388.854 45.8104   2
   8  -1 -10 383.842 37.5984   1
  -8   1  10 451.053 43.4323   2
  -8   1  10 456.638 37.8277   3
   8   1 -10 394.244 35.5895   1
   7  -1 -10 127.839 25.8908   1
  -7  -1  10 81.0372 35.3376   2
  -7  -1  10 66.0011 22.1820   3
  -7   1  10 50.0518 25.8624   2
   7   1 -10 60.5411 19.5081   1
  -7   1  10 76.1988 16.5725   3
  -6  -1  10 16.1755 34.6937   2
   6  -1 -10 -13.541 19.8326   1
   6   1 -10 -2.3823 15.0048   1
  -6   1  10 14.3214 24.3692   2
  -6   1  10 -20.399 12.0625   3
   5  -1 -10 34.5191 19.8466   1
  -5  -1  10 27.6212 32.0548   2
  -5   1  10 55.9236 12.8407   3
   5   1 -10 40.1344 17.0903   1
  -5   1  10 44.5945 28.5371   2
  -4  -1  10 101.018 32.7745   2
   4  -1 -10 60.3960 19.1473   1
  -4   1  10 67.2967 28.2283   2
   4   1 -10 74.7588 17.0395   1
  -4   1  10 48.6854 10.7072   3
  -3  -1  10 123.641 35.1535   2
   3  -1 -10 111.026 21.4473   1
  -3  -1  10 154.450 16.8453   1
  -3   1  10 49.5155 28.5671   2
   3   1 -10 153.587 17.7021   1
  -3   1  10 154.221 14.2978   3
  -2  -1  10 56.7499 34.3891   2
   2  -1 -10 19.6794 16.7749   1
  -2  -1  10 16.0384 11.5644   1
  -2   1  10 35.5810 11.4134   3
  -2   1  10 51.5428 29.0575   2
   2   1 -10 33.1404 14.3101   1
   1  -1 -10 6.73257 12.0395   3
   1  -1 -10 26.9290 17.2413   1
  -1  -1  10 12.0349 29.6922   2
  -1   1  10 31.3554 12.5250   3
   1   1 -10 16.9110 12.7364   1
  -1   1  10 53.3756 28.9920   2
   1   1 -10 46.2884 17.9239   3
   0  -1 -10 88.5535 16.3318   3
   0  -1 -10 62.4387 18.6204   1
   0  -1  10 72.5194 30.0765   2
   0   1 -10 93.7145 15.4377   1
   0   1  10 96.6366 30.0428   2
   0   1 -10 95.8208 20.8697   3
   0   1  10 78.4447 16.0575   3
   1  -1  10 -6.0676 25.1328   2
  -1  -1 -10 14.5726 14.7506   3
  -1  -1 -10 -12.012 16.0853   1
  -1   1 -10 -0.0098 13.2586   1
   1   1  10 -32.914 23.1047   2
   1   1  10 -0.0025 15.0172   3
  -1   1 -10 5.98461 18.1922   3
   2  -1  10 625.843 54.5717   2
  -2  -1 -10 635.851 46.8943   1
  -2  -1 -10 656.961 45.2264   3
   2   1  10 555.320 50.3151   2
  -2   1 -10 650.264 50.7645   3
  -3  -1 -10 768.371 54.8300   3
   3  -1  10 803.416 66.0162   2
   3   1  10 816.950 57.6026   2
  -3   1 -10 851.052 59.4784   3
  -4  -1 -10 1120.23 70.3441   3
   4  -1  10 987.200 76.0017   2
  -4   1 -10 1119.14 72.6310   3
  -5  -1 -10 1810.11 98.2291   3
   5  -1  10 1316.29 99.2067   2
  -5  -1 -10 1691.17 93.5025   2
  -5   1 -10 1592.14 98.7612   3
   6  -1  10 440.378 41.3520   2
  -6  -1 -10 392.825 40.8746   3
  -6  -1 -10 375.140 34.5715   2
  -6   1 -10 588.648 48.0953   2
  -6   1 -10 444.888 43.0843   3
  -7  -1 -10 1.63230 24.2665   3
   7  -1  10 20.4278 21.1697   2
  -7   1 -10 23.7748 26.0664   3
  -8  -1 -10 125.806 30.9612   3
  -8   1 -10 50.4346 29.7365   3
  -9  -1 -10 30.0287 29.3583   3
  -9   1 -10 71.0245 30.9482   3
 -10  -1 -10 34.4908 31.5611   3
 -10   1 -10 5.99079 30.9785   3
 -11  -1 -10 -34.217 32.2528   3
 -11   1 -10 0.53492 32.7062   3
 -12  -1 -10 45.6900 37.2560   3
 -12   1 -10 61.4304 38.1527   3
 -13  -1 -10 -1.1642 50.0653   3
 -15  -2  10 106.342 39.0126   3
  15  -2 -10 76.8335 46.2379   1
 -14  -2  10 -10.786 32.6836   3
  14  -2 -10 37.2510 33.4905   1
  13  -2 -10 65.4773 32.8532   1
 -13  -2  10 68.4861 32.9234   3
  13   2 -10 68.2566 29.3849   1
  12  -2 -10 -29.069 27.3218   1
 -12  -2  10 -7.0139 28.2565   3
 -12  -2  10 22.5735 29.4448   2
  12   2 -10 -31.546 24.4578   1
 -11  -2  10 48.2051 26.8832   3
  11  -2 -10 3.19545 27.7326   1
 -11  -2  10 36.3541 31.2235   2
 -11   2  10 21.0009 24.5279   3
  11   2 -10 22.7105 22.9761   1
  10  -2 -10 51.4787 28.7086   1
 -10  -2  10 67.7876 35.0637   2
 -10  -2  10 60.0433 27.1030   3
 -10   2  10 105.952 24.7580   3
  10   2 -10 53.7855 23.2192   1
   9  -2 -10 61.6895 26.3721   1
  -9  -2  10 68.5455 37.9157   2
  -9  -2  10 115.567 27.9904   3
   9   2 -10 49.0842 19.7809   1
  -9   2  10 64.6378 21.6195   3
  -8  -2  10 115.742 28.1468   3
   8  -2 -10 88.1541 25.9648   1
  -8  -2  10 57.9926 40.5881   2
   8   2 -10 171.139 23.6539   1
  -8   2  10 135.184 21.6827   3
   7  -2 -10 98.6353 24.8060   1
  -7  -2  10 -8.6268 35.7422   2
  -7   2  10 69.4784 16.8427   3
   7   2 -10 42.9932 17.9966   1
   6  -2 -10 4.50695 22.5642   1
  -6  -2  10 80.5149 36.6591   2
  -6   2  10 15.8322 12.6384   3
   6   2 -10 2.03230 14.1554   1
  -5  -2  10 257.345 39.9193   2
   5  -2 -10 194.952 28.5691   1
   5   2 -10 202.094 20.7998   1
   4  -2 -10 437.982 36.6370   1
  -4  -2  10 478.247 46.2494   2
   4   2 -10 429.908 31.0790   1
   3  -2 -10 1461.88 87.9113   1
  -3  -2  10 1534.10 80.7518   1
  -3  -2  10 1409.21 92.1004   2
   3   2 -10 1468.82 81.2905   1
  -2  -2  10 2969.97 163.405   2
   2  -2 -10 2882.78 159.195   1
   2   2 -10 2847.43 152.975   1
  -1  -2  10 1109.30 75.0128   2
   1  -2 -10 1132.34 61.7905   3
   1  -2 -10 1173.77 70.6758   1
   1   2 -10 1047.87 62.6352   1
  -1   2  10 1146.63 62.1555   3
   0  -2  10 54.0556 24.9820   2
   0  -2 -10 63.4527 12.6636   3
   0  -2 -10 45.8576 20.0384   1
   0   2  10 72.0398 14.1828   3
   0   2 -10 62.3128 20.9097   3
   0   2 -10 25.0565 11.2158   1
  -1  -2 -10 172.528 18.4184   3
   1  -2  10 123.315 27.3500   2
  -1  -2 -10 131.069 24.1854   1
  -1   2 -10 137.134 15.8819   1
  -1   2 -10 79.1722 22.8251   3
   1   2  10 153.922 19.5412   3
  -2  -2 -10 9.03474 15.5051   3
   2  -2  10 43.2214 21.6906   2
  -2  -2 -10 6.39477 18.0726   1
  -2   2 -10 12.6707 21.1263   3
   3  -2  10 43.6821 22.8444   2
  -3  -2 -10 29.3383 17.7387   3
  -3  -2 -10 14.5069 20.4223   1
  -3   2 -10 35.4084 22.7015   3
   4  -2  10 -0.5612 21.5621   2
  -4  -2 -10 12.9820 19.5244   3
  -4   2 -10 -4.2093 23.1423   3
  -5  -2 -10 31.4564 22.0705   3
   5  -2  10 25.8636 21.7966   2
  -5   2 -10 26.8306 24.6485   3
  -6  -2 -10 -12.367 22.2192   3
   6  -2  10 -3.3711 21.4891   2
  -6   2 -10 -10.875 24.0948   3
  -7  -2 -10 30.3668 25.9926   3
   7  -2  10 -8.5061 20.8702   2
  -7   2 -10 21.2106 26.4523   3
  -8  -2 -10 36.9300 27.8833   3
  -8   2 -10 25.9641 28.6667   3
  -9  -2 -10 257.998 40.5333   3
  -9   2 -10 239.289 40.2040   3
 -10  -2 -10 120.611 37.3564   3
 -10   2 -10 98.5880 37.0788   3
 -11  -2 -10 126.523 40.1380   3
 -11   2 -10 98.5452 37.8407   3
 -12  -2 -10 55.4305 40.3420   3
 -12   2 -10 72.7890 39.0935   3
 -14  -3  10 -9.8710 34.2633   3
  14  -3 -10 14.1279 33.8780   1
  13  -3 -10 -9.9180 29.8787   1
 -13  -3  10 -14.712 30.4621   3
 -12  -3  10 7.00339 34.2048   2
 -12  -3  10 -24.396 28.5171   3
  12  -3 -10 -30.231 30.0398   1
  11  -3 -10 41.9922 31.3568   1
 -11  -3  10 -3.2276 28.3382   3
 -11  -3  10 -5.7993 38.1900   2
 -10  -3  10 37.6356 28.6325   3
  10  -3 -10 10.5120 25.6401   1
 -10  -3  10 -7.7497 38.0264   2
   9  -3 -10 9.46393 25.4396   1
  -9  -3  10 27.6476 27.2091   3
  -9  -3  10 -21.155 36.7720   2
   9   3 -10 -11.422 19.4648   1
  -8  -3  10 191.248 44.8387   2
   8  -3 -10 180.192 32.5103   1
  -8   3  10 256.673 24.4951   3
   8   3 -10 253.154 26.9873   1
   7  -3 -10 299.327 35.4641   1
  -7  -3  10 465.293 50.9009   2
   7   3 -10 392.859 31.3846   1
  -6  -3  10 -1.6681 15.8592   1
   6  -3 -10 18.3452 22.4395   1
  -6  -3  10 18.2450 29.1767   2
   6   3 -10 -3.2513 13.4015   1
  -5  -3  10 219.444 36.7527   2
   5  -3 -10 306.113 34.0483   1
   5   3 -10 321.654 23.7501   1
  -4  -3  10 77.4049 28.5114   2
  -4  -3  10 66.2246 10.7714   1
   4  -3 -10 24.0867 20.1914   1
   4   3 -10 53.6774 11.1014   1
   3  -3 -10 1.73238 20.6523   1
  -3  -3  10 70.2610 25.8160   2
  -3  -3  10 11.8460 7.57036   1
   3   3 -10 29.6554 8.43200   1
  -2  -3  10 125.607 28.9204   2
   2  -3 -10 81.7014 22.0453   1
  -1  -3  10 165.283 27.9198   2
   1  -3 -10 176.885 26.7510   1
   0  -3 -10 21.0540 19.6464   1
   0  -3  10 40.8743 24.3060   2
   0  -3 -10 -9.6367 11.2145   3
   0   3 -10 26.7759 8.60859   1
   0   3 -10 3.03357 21.4762   3
   1  -3  10 2.50212 22.1566   2
  -1  -3 -10 -4.1711 18.7819   1
  -1  -3 -10 -5.8400 13.2417   3
   1   3  10 -9.1603 12.4304   3
  -1   3 -10 7.27562 10.1601   1
  -1   3 -10 40.8777 22.1833   3
  -1   3 -10 16.2865 9.82773   1
   2  -3  10 213.474 30.8182   2
  -2  -3 -10 166.667 22.3813   3
  -2  -3 -10 183.763 26.9626   1
  -2   3 -10 185.070 18.6618   1
  -2   3 -10 200.988 29.8441   3
   3  -3  10 413.189 38.4832   2
  -3  -3 -10 405.954 34.3226   3
  -3  -3 -10 395.513 39.0834   1
  -3   3 -10 404.780 40.1673   3
   4  -3  10 391.593 38.2707   2
  -4  -3 -10 342.368 37.5223   1
  -4  -3 -10 433.654 36.3787   3
  -4   3 -10 378.450 41.3899   3
   5  -3  10 3.80693 21.7635   2
  -5  -3 -10 50.1403 23.5151   3
  -5   3 -10 62.5231 28.0718   3
   6  -3  10 157.166 27.9586   2
  -6  -3 -10 180.694 30.7423   3
  -6   3 -10 126.881 32.4190   3
  -7  -3 -10 18.4274 27.6043   3
   7  -3  10 62.8732 23.5001   2
  -7   3 -10 36.0163 29.5724   3
  -8  -3 -10 41.4687 30.8660   3
  -8   3 -10 35.7917 32.2671   3
  -9  -3 -10 -4.4682 32.1217   3
  -9   3 -10 -0.6994 32.5700   3
 -10  -3 -10 22.2664 35.0771   3
 -10   3 -10 22.0005 35.3219   3
 -11  -3 -10 2.87665 36.8802   3
 -11   3 -10 38.7179 37.4981   3
 -12  -3 -10 15.6532 40.1968   3
 -12   3 -10 26.0480 39.3417   3
 -14  -4  10 0.22056 35.0618   3
 -13  -4  10 -17.506 32.3568   3
  13  -4 -10 28.0547 33.8908   1
 -12  -4  10 -11.801 47.3009   2
 -12  -4  10 16.5664 33.4491   3
  12  -4 -10 60.6846 33.0509   1
 -11  -4  10 39.7030 32.4234   3
 -11  -4  10 77.0206 46.8020   2
  11  -4 -10 35.5678 30.0512   1
 -10  -4  10 10.8700 41.0600   2
  10  -4 -10 117.230 31.9602   1
 -10  -4  10 27.9810 30.6542   3
  -9  -4  10 52.2630 36.2328   2
   9  -4 -10 -5.3450 27.3960   1
   8  -4 -10 15.4288 26.7625   1
  -8  -4  10 22.3806 33.8230   2
  -7  -4  10 12.4706 30.1564   2
   7  -4 -10 22.1413 27.2717   1
   6  -4 -10 2.52675 24.2053   1
  -6  -4  10 2.58082 28.6168   2
  -5  -4  10 111.354 31.4904   2
   5  -4 -10 115.386 27.5914   1
   4  -4 -10 718.680 55.6751   1
  -4  -4  10 682.572 59.6134   2
   3  -4 -10 1306.06 81.1086   1
  -3  -4  10 1171.78 82.5622   2
  -2  -4  10 1238.63 82.7070   2
   2  -4 -10 1249.17 80.6472   1
  -1  -4  10 601.877 52.1765   2
   1  -4 -10 541.996 47.1108   1
   0  -4  10 82.4369 26.7562   2
   0  -4 -10 92.8772 23.9177   1
   0  -4 -10 57.6111 14.1768   3
  -1  -4 -10 5.95097 22.1611   1
   1  -4  10 -1.4651 22.8305   2
  -1  -4 -10 -15.091 14.8081   3
  -1   4 -10 3.15438 7.68724   1
  -1   4 -10 10.7261 23.8910   3
  -1   4 -10 16.4000 7.47089   1
  -2  -4 -10 149.258 29.6521   1
  -2  -4 -10 110.184 20.5801   3
   2  -4  10 106.087 28.5479   2
  -2   4 -10 124.208 14.4788   1
  -2   4 -10 72.2233 27.6683   3
  -3  -4 -10 86.2727 26.4713   1
  -3  -4 -10 67.7147 20.5757   3
   3  -4  10 101.529 28.9387   2
  -3   4 -10 51.9397 28.0548   3
  -4  -4 -10 -32.177 23.5612   1
   4  -4  10 46.1767 25.5833   2
  -4  -4 -10 -23.249 19.1889   3
  -4   4 -10 -7.0445 25.0124   3
   5  -4  10 17.3733 24.4402   2
  -5  -4 -10 31.8051 25.7050   1
  -5  -4 -10 47.9386 24.3888   3
  -5   4 -10 45.7635 28.3760   3
   6  -4  10 -19.545 23.1761   2
  -6  -4 -10 12.5454 25.3205   3
  -6   4 -10 17.5585 29.1669   3
  -7  -4 -10 -19.448 25.2583   3
   7  -4  10 26.3957 24.4307   2
  -7   4 -10 9.60486 30.5255   3
  -8  -4 -10 31.4969 30.3390   3
  -8   4 -10 -34.532 30.7181   3
  -9  -4 -10 130.171 37.1880   3
  -9   4 -10 118.555 40.2365   3
 -10  -4 -10 86.2420 39.0416   3
 -10   4 -10 102.407 41.6885   3
 -11  -4 -10 245.176 48.9660   3
 -11   4 -10 202.653 47.0525   3
 -12  -4 -10 124.225 50.9846   3
 -13  -5  10 22.8301 35.6139   3
 -12  -5  10 20.1245 33.6485   3
  12  -5 -10 26.2806 33.0051   1
  11  -5 -10 77.8063 32.0547   1
 -11  -5  10 13.5161 42.9240   2
 -11  -5  10 45.8415 33.8090   3
  10  -5 -10 270.712 40.8886   1
 -10  -5  10 223.172 48.2155   2
 -10  -5  10 227.637 41.4431   3
   9  -5 -10 403.015 47.8559   1
  -9  -5  10 484.263 54.4587   2
  -8  -5  10 37.6693 32.0115   2
   8  -5 -10 -21.132 27.8015   1
   7  -5 -10 17.0690 28.8357   1
  -7  -5  10 -34.910 28.4163   2
   6  -5 -10 -11.110 25.1808   1
  -6  -5  10 -2.8090 27.8855   2
   5  -5 -10 7.14160 24.8880   1
  -5  -5  10 22.6558 25.2202   2
   4  -5 -10 13.2638 23.0334   1
  -4  -5  10 46.9275 27.9836   2
  -3  -5  10 36.8665 26.0827   2
   3  -5 -10 23.1507 26.2769   1
  -2  -5  10 7.24443 27.1423   2
   2  -5 -10 17.6678 25.6405   1
  -1  -5  10 9.87018 24.5299   2
   1  -5 -10 17.9298 24.1587   1
   1  -5 -10 -10.684 12.2323   3
   0  -5 -10 18.7248 26.4336   1
   0  -5 -10 15.8804 14.8820   3
   0  -5  10 72.5760 30.2689   2
  -1  -5 -10 39.1906 18.0779   3
  -1  -5 -10 9.41770 24.4270   1
   1  -5  10 9.37542 28.3681   2
   2  -5  10 176.619 35.2111   2
  -2  -5 -10 151.159 24.0394   3
  -2  -5 -10 128.462 31.1771   1
  -2   5 -10 164.433 33.4656   3
   3  -5  10 118.520 31.2455   2
  -3  -5 -10 141.835 25.0636   3
  -3  -5 -10 84.4963 31.8136   1
  -3   5 -10 113.019 32.5069   3
   4  -5  10 128.262 31.9057   2
  -4  -5 -10 121.365 25.5984   3
  -4  -5 -10 134.326 31.7081   1
  -4   5 -10 106.482 33.0867   3
  -5  -5 -10 681.550 54.9809   3
  -5  -5 -10 557.113 53.7021   1
   5  -5  10 633.896 55.9017   2
  -5   5 -10 651.090 59.9190   3
  -6  -5 -10 190.171 32.9371   3
  -6  -5 -10 176.536 36.0650   1
   6  -5  10 211.348 36.3407   2
  -6   5 -10 219.570 40.5970   3
   7  -5  10 38.0376 28.5191   2
  -7  -5 -10 -0.4268 27.5306   3
  -7  -5 -10 22.1357 29.1662   1
  -7   5 -10 1.42145 32.8960   3
  -8  -5 -10 135.457 36.3691   3
  -8  -5 -10 88.6973 31.0611   1
  -8   5 -10 184.746 42.8316   3
  -9  -5 -10 3.31983 34.2760   3
  -9   5 -10 -71.855 35.0267   3
 -10  -5 -10 -3.2485 35.7806   3
 -10   5 -10 -9.3100 38.5366   3
 -11  -5 -10 59.6801 40.9620   3
 -11  -6  10 -3.2855 35.2582   3
  11  -6 -10 17.2665 31.7785   1
 -11  -6  10 -14.401 38.8563   2
 -10  -6  10 -53.704 31.6150   2
  10  -6 -10 44.5976 30.5230   1
 -10  -6  10 27.5645 35.9833   3
  -9  -6  10 15.0078 32.3418   2
   9  -6 -10 -56.252 29.0669   1
   8  -6 -10 -0.4014 29.1080   1
  -8  -6  10 -30.384 31.5437   2
   7  -6 -10 -10.629 29.3395   1
  -7  -6  10 26.1952 31.1853   2
   6  -6 -10 16.8882 28.5527   1
  -6  -6  10 -24.535 28.3713   2
  -5  -6  10 -17.472 29.0350   2
   5  -6 -10 -55.275 25.8384   1
   4  -6 -10 40.6282 27.6103   1
  -4  -6  10 39.3542 28.3573   2
  -3  -6  10 0.86389 26.4068   2
   3  -6 -10 -3.4974 26.9870   1
  -2  -6  10 34.7069 30.5256   2
   2  -6 -10 -41.844 26.1047   1
  -1  -6  10 -19.169 29.0775   2
   1  -6 -10 -29.486 27.0022   1
   0  -6 -10 101.581 31.8092   1
   0  -6  10 76.2230 35.3453   2
  -1  -6 -10 -8.5323 25.1804   1
  -1  -6 -10 54.9265 20.1102   3
   1  -6  10 24.2209 31.4605   2
  -2  -6 -10 49.9864 28.5239   1
   2  -6  10 20.3144 32.7187   2
  -2  -6 -10 52.1766 21.3298   3
  -3  -6 -10 1.08483 26.3694   1
  -3  -6 -10 -21.561 22.1439   3
   3  -6  10 20.7726 29.8044   2
  -4  -6 -10 29.6355 30.1624   1
  -4  -6 -10 -46.259 21.7060   3
   4  -6  10 -9.2075 31.7846   2
  -4   6 -10 -17.900 31.4186   3
  -5  -6 -10 14.2015 30.2352   1
  -5  -6 -10 -32.389 24.2729   3
   5  -6  10 15.0543 30.6255   2
  -5   6 -10 48.3392 34.3023   3
   6  -6  10 -22.576 30.5311   2
  -6  -6 -10 8.87268 27.6033   2
  -6  -6 -10 15.7859 26.4584   3
  -6  -6 -10 -9.6773 29.6932   1
  -6   6 -10 3.49315 34.9250   3
  -7  -6 -10 -23.508 29.1301   1
   7  -6  10 7.37327 31.1343   2
  -7  -6 -10 -17.975 27.8413   3
  -7   6 -10 49.8753 38.7169   3
  -8  -6 -10 -1.9147 30.4333   1
  -8  -6 -10 -13.284 32.9286   3
  -8   6 -10 -8.3852 37.5708   3
  -9  -6 -10 39.5762 31.1163   1
  -9  -6 -10 40.2314 36.8502   3
  -9   6 -10 19.3488 40.2743   3
 -10  -7  10 81.3810 39.5439   2
  10  -7 -10 156.360 36.6678   1
  -9  -7  10 56.4404 38.3020   2
   9  -7 -10 97.5147 35.9153   1
  -8  -7  10 53.8768 35.1062   2
   8  -7 -10 19.8565 33.5899   1
  -7  -7  10 53.2281 36.4049   2
   7  -7 -10 71.2984 33.9358   1
  -6  -7  10 -30.632 31.0841   2
   6  -7 -10 -0.9369 29.7125   1
   5  -7 -10 40.3089 29.6073   1
  -5  -7  10 60.4498 34.8023   2
  -4  -7  10 41.2955 34.8999   2
   4  -7 -10 11.8830 28.7409   1
  -3  -7  10 43.0395 33.9948   2
   3  -7 -10 33.0155 28.9430   1
  -2  -7  10 5.83970 33.6923   2
   2  -7 -10 -45.921 28.4748   1
   1  -7 -10 44.0212 31.7737   1
  -1  -7  10 -1.4212 32.1604   2
   0  -7 -10 5.04755 31.2006   1
   0  -7  10 -7.2700 34.0065   2
  -1  -7 -10 -30.175 31.9789   1
   1  -7  10 3.80529 31.7459   2
   2  -7  10 62.4217 34.8388   2
  -2  -7 -10 35.0570 29.6237   1
  -3  -7 -10 162.743 36.3537   1
   3  -7  10 131.828 40.9891   2
  -4  -7 -10 74.1248 32.5935   2
   4  -7  10 317.657 46.7688   2
  -4  -7 -10 221.938 40.3370   1
  -5  -7 -10 100.244 39.2158   3
  -5  -7 -10 140.341 35.5294   1
  -5  -7 -10 79.0510 32.9305   2
   5  -7  10 105.337 39.7702   2
  -5   7 -10 212.841 44.2160   3
   6  -7  10 53.3089 36.4388   2
  -6  -7 -10 23.7851 32.6915   1
  -6  -7 -10 -36.043 27.8603   3
  -6   7 -10 31.0895 39.4031   3
  -7  -7 -10 55.6374 32.9311   1
   7  -7  10 30.1451 35.3675   2
  -7  -7 -10 5.78858 30.1832   3
  -7   7 -10 72.9929 41.8525   3
  -8  -7 -10 71.4517 35.8080   3
  -8  -7 -10 -0.9815 31.5961   1
  -8   7 -10 -1.0777 41.3651   3
   8  -8 -10 -116.23 30.5441   1
  -8  -8  10 -34.544 32.7613   2
   7  -8 -10 18.7976 32.9344   1
  -7  -8  10 -9.0468 35.6792   2
  -6  -8  10 -4.8405 33.8580   2
   6  -8 -10 -15.019 30.5284   1
  -5  -8  10 -33.652 32.6460   2
   5  -8 -10 28.3550 32.6141   1
   4  -8 -10 -6.7690 30.3500   1
  -4  -8  10 -32.212 33.4622   2
  -3  -8  10 50.6949 35.6623   2
   3  -8 -10 64.7627 32.8535   1
  -2  -8  10 123.021 40.2372   2
   2  -8 -10 238.709 38.9080   1
  -1  -8  10 12.6157 37.6367   2
   1  -8 -10 21.8799 32.3173   1
   0  -8  10 12.0887 38.9477   2
   0  -8 -10 88.8167 34.9876   1
   1  -8  10 44.9068 41.1736   2
  -1  -8 -10 49.4573 36.6603   1
  -2  -8 -10 -11.460 35.7503   1
   2  -8  10 -14.142 38.1083   2
  -2  -8 -10 22.4015 31.6678   2
  -3  -8 -10 4.29356 32.3002   2
   3  -8  10 -33.037 35.1474   2
  -3  -8 -10 8.98430 34.5626   1
  -4  -8 -10 -35.556 29.1896   1
  -4  -8 -10 -4.9745 31.5518   2
   4  -8  10 -8.6345 35.7855   2
  -5  -8 -10 -9.7873 29.7637   2
   5  -8  10 -47.710 36.8840   2
  -5  -8 -10 63.6724 32.6985   1
   3  -9 -10 -41.627 28.0457   1
   2  -9 -10 33.5307 32.6564   1
   1  -9 -10 35.1973 35.6406   1
   1  -9 -10 39.5073 40.8970   2
   0  -9 -10 -59.564 29.2228   2
   0  -9 -10 -27.012 34.4157   1
  -1  -9 -10 40.2019 34.4347   2
  -1  -9 -10 5.20119 36.1729   1
  15   0 -11 8.14015 31.5047   1
  14   0 -11 25.1972 29.4586   1
 -14   0  11 20.0191 29.9207   3
 -13   0  11 -14.058 26.1860   3
  13   0 -11 13.6936 29.0720   1
  12   0 -11 39.3770 28.6995   1
 -12   0  11 -59.667 22.6870   3
 -11   0  11 14.5811 23.3646   3
  11   0 -11 -23.029 24.3026   1
 -11   0  11 47.0098 28.4807   2
 -10   0  11 5.85795 27.4349   2
 -10   0  11 8.26894 21.5111   3
  10   0 -11 19.9601 23.8304   1
  -9   0  11 4.85977 19.0538   3
  -9   0  11 12.0224 29.3638   2
   9   0 -11 -41.757 21.0755   1
   8   0 -11 -27.529 19.5467   1
  -8   0  11 4.25301 17.9640   3
  -8   0  11 25.1599 29.3411   2
   7   0 -11 -11.009 20.4467   1
  -7   0  11 10.5228 16.8333   3
  -7   0  11 -12.277 29.3549   2
   6   0 -11 -11.838 19.6708   1
  -6   0  11 9.10927 30.3127   2
  -5   0  11 19.1360 31.0579   2
   5   0 -11 4.28214 18.1431   1
  -4   0  11 -28.475 26.9739   2
   4   0 -11 -5.0598 16.1718   1
  -4   0  11 16.0463 12.1335   3
  -3   0  11 -3.1173 12.3937   3
  -3   0  11 -4.7402 25.0176   2
   3   0 -11 -15.751 17.4929   1
  -2   0  11 -0.2365 13.3526   3
   2   0 -11 32.2448 16.4056   1
  -2   0  11 21.5465 30.0010   2
  -1   0  11 35.2969 14.7082   3
  -1   0  11 14.3982 31.1580   2
   1   0 -11 -14.853 15.0205   3
   1   0 -11 -11.512 14.7157   1
   0   0 -11 -7.3666 15.6033   3
   0   0 -11 14.0468 14.7070   1
   0   0  11 -47.009 30.3884   2
   1   0  11 -28.617 25.8557   2
  -1   0 -11 -11.766 16.7755   3
  -1   0 -11 -32.157 15.1855   1
  -2   0 -11 6.02790 18.3840   3
   2   0  11 10.0142 26.0595   2
  -2   0 -11 -10.263 15.8659   1
  -3   0 -11 14.0861 19.6964   3
   3   0  11 -9.7317 24.1698   2
  -4   0 -11 -3.8948 20.8858   3
   4   0  11 -15.658 23.0390   2
  -5   0 -11 -7.4705 22.5884   3
   5   0  11 10.3862 21.3527   2
  -6   0 -11 -2.4356 23.5930   3
   6   0  11 7.28429 18.7638   2
  -7   0 -11 -19.936 24.8591   3
  -8   0 -11 -12.242 26.5897   3
  -9   0 -11 -9.3944 28.8793   3
 -10   0 -11 -6.6415 30.6056   3
 -11   0 -11 -14.244 32.4138   3
 -12   0 -11 -66.631 33.6099   3
 -15  -1  11 14.0799 34.0104   3
  15  -1 -11 8.01427 33.7534   1
  15   1 -11 -9.7445 30.6518   1
 -14  -1  11 -33.967 29.1171   3
  14  -1 -11 -4.0611 27.8323   1
  14   1 -11 -20.857 29.7847   1
 -13  -1  11 0.94388 28.6236   3
  13  -1 -11 43.8584 29.3083   1
  13   1 -11 54.5949 27.8679   1
  12  -1 -11 52.0296 31.8236   1
 -12  -1  11 64.8520 29.0203   3
 -12  -1  11 37.4857 29.4782   2
  12   1 -11 55.1982 28.8425   1
 -12   1  11 29.1845 24.8927   3
  11  -1 -11 331.205 38.5324   1
 -11  -1  11 278.027 36.8423   3
 -11  -1  11 310.439 42.4331   2
  11   1 -11 384.098 39.6842   1
 -11   1  11 342.380 35.9463   3
 -10  -1  11 72.3591 32.6414   2
  10  -1 -11 82.4107 28.2839   1
 -10  -1  11 42.6081 24.0624   3
 -10   1  11 72.6965 22.1105   3
  10   1 -11 73.3759 25.4472   1
   9  -1 -11 172.022 29.3455   1
  -9  -1  11 169.740 39.7480   2
  -9  -1  11 176.171 28.6414   3
  -9   1  11 218.241 26.2333   3
   9   1 -11 245.393 30.0678   1
  -8  -1  11 -15.530 29.6607   2
   8  -1 -11 -22.593 22.5589   1
  -8  -1  11 21.4866 20.5279   3
   8   1 -11 -9.4153 18.9886   1
  -8   1  11 1.96952 16.2270   3
  -8   1  11 6.12726 26.8094   2
   7  -1 -11 75.4768 24.4063   1
  -7  -1  11 65.7170 34.2534   2
   7   1 -11 66.7750 20.4348   1
  -7   1  11 28.2784 25.2855   2
  -7   1  11 55.9255 15.9386   3
   6  -1 -11 18.3169 22.6632   1
  -6  -1  11 0.63952 35.5224   2
   6   1 -11 1.70661 16.0075   1
  -6   1  11 19.0992 27.9890   2
  -6   1  11 16.9104 12.8399   3
   5  -1 -11 28.8200 20.9966   1
  -5  -1  11 11.6960 35.5059   2
   5   1 -11 34.5639 16.6587   1
  -5   1  11 34.4925 24.7559   2
  -5   1  11 17.4010 12.2139   3
   4  -1 -11 26.6788 19.4425   1
  -4  -1  11 11.2247 30.0553   2
  -4   1  11 7.92867 9.71590   3
   4   1 -11 -20.700 15.2732   1
  -4   1  11 0.86919 27.4043   2
   3  -1 -11 149.614 23.7075   1
  -3  -1  11 135.299 18.7978   1
  -3  -1  11 90.8935 38.6413   2
  -3   1  11 93.5855 30.3396   2
  -3   1  11 180.725 15.7325   3
   3   1 -11 134.161 18.7218   1
  -2  -1  11 1.89513 11.8781   1
  -2  -1  11 13.0366 34.5806   2
   2  -1 -11 -21.680 16.7996   1
  -2   1  11 -9.8490 25.4641   2
   2   1 -11 26.3043 14.3078   1
  -2   1  11 -7.6424 11.0248   3
  -1  -1  11 90.5908 31.9369   2
   1  -1 -11 29.6630 17.6464   1
   1  -1 -11 60.6702 14.4150   3
  -1   1  11 57.3484 28.0293   2
  -1   1  11 37.4629 14.0770   3
   1   1 -11 55.2870 19.0797   3
   1   1 -11 26.0665 14.5332   1
   0  -1 -11 117.392 21.0324   1
   0  -1  11 42.5684 33.3542   2
   0  -1 -11 100.618 17.6038   3
   0   1 -11 90.5297 21.3143   3
   0   1  11 104.339 17.8224   3
   0   1  11 64.7355 28.2848   2
   0   1 -11 88.9295 16.1393   1
  -1  -1 -11 124.354 22.1534   1
   1  -1  11 65.0214 33.9991   2
  -1  -1 -11 144.349 20.2216   3
  -1   1 -11 89.9402 21.9100   3
  -1   1 -11 86.1673 16.7272   1
   1   1  11 74.8765 26.5272   2
  -2  -1 -11 -1.7506 16.8934   3
  -2  -1 -11 37.7601 19.4099   1
   2  -1  11 -46.761 28.5635   2
  -2   1 -11 8.28155 20.4650   3
   2   1  11 67.9561 25.1710   2
  -3  -1 -11 538.050 40.5059   3
   3  -1  11 443.759 48.6680   2
  -3   1 -11 513.766 42.2576   3
   3   1  11 490.795 45.0860   2
   4  -1  11 631.078 60.7293   2
  -4  -1 -11 898.632 58.1131   3
  -4   1 -11 873.557 62.2696   3
   5  -1  11 -24.724 27.2858   2
  -5  -1 -11 22.8497 21.9599   3
  -5   1 -11 20.4373 23.0497   3
   6  -1  11 299.553 35.4262   2
  -6  -1 -11 299.622 35.9375   3
  -6   1 -11 271.095 36.2837   3
  -7  -1 -11 34.9404 27.1262   3
   7  -1  11 29.6391 21.0951   2
  -7   1 -11 29.2506 26.8037   3
  -8  -1 -11 20.6679 27.9155   3
  -8   1 -11 -22.861 26.7051   3
  -9  -1 -11 2.00536 29.5326   3
  -9   1 -11 -20.265 29.8136   3
 -10  -1 -11 77.4570 34.8543   3
 -10   1 -11 -3.4172 32.0727   3
 -11  -1 -11 44.6161 35.8651   3
 -11   1 -11 57.5490 36.5826   3
 -12  -1 -11 -5.5526 36.8775   3
 -12   1 -11 -26.380 35.1951   3
 -15  -2  11 32.6257 35.8501   3
 -14  -2  11 94.3790 36.1479   3
  14  -2 -11 36.7558 33.6258   1
 -13  -2  11 -3.1739 30.4095   3
  13  -2 -11 2.37971 31.3320   1
  13   2 -11 19.7228 26.8499   1
 -12  -2  11 -31.461 31.0478   2
  12  -2 -11 -0.1145 25.9402   1
 -12  -2  11 28.1791 28.7132   3
  12   2 -11 4.49502 26.8743   1
  11  -2 -11 13.3426 29.1975   1
 -11  -2  11 14.0938 26.3922   3
 -11  -2  11 -6.2316 31.2064   2
  11   2 -11 5.08391 22.6304   1
 -10  -2  11 2.55385 31.8452   2
 -10  -2  11 -16.614 23.3634   3
  10  -2 -11 -42.619 23.4010   1
  10   2 -11 17.5410 20.4499   1
 -10   2  11 9.72812 24.2645   3
  -9  -2  11 42.4259 37.7689   2
   9  -2 -11 91.4993 28.6714   1
  -9  -2  11 58.4277 25.8690   3
  -9   2  11 47.4738 20.2838   3
   9   2 -11 64.3677 20.7218   1
   8  -2 -11 193.592 32.4695   1
  -8  -2  11 119.858 42.0602   2
   8   2 -11 219.771 26.0830   1
  -8   2  11 159.822 22.5372   3
   7  -2 -11 20.0410 23.5762   1
  -7  -2  11 25.9255 39.5620   2
   7   2 -11 -13.138 16.2578   1
  -7   2  11 2.32685 14.2361   3
  -6  -2  11 -25.458 35.6044   2
   6  -2 -11 -10.500 19.8979   1
   6   2 -11 -18.759 13.8355   1
  -5  -2  11 122.196 33.4331   2
   5  -2 -11 81.9781 24.2916   1
   5   2 -11 104.036 16.7529   1
  -4  -2  11 913.963 71.2684   2
   4  -2 -11 856.766 59.2972   1
  -4  -2  11 844.148 50.7814   1
   4   2 -11 836.666 51.4845   1
  -3  -2  11 1060.29 74.5616   2
   3  -2 -11 1075.89 68.2210   1
  -3  -2  11 1074.73 59.5145   1
   3   2 -11 992.339 60.0206   1
  -2  -2  11 48.0288 27.3102   2
   2  -2 -11 14.8972 19.8648   1
   2   2 -11 19.1932 12.3395   1
   1  -2 -11 11.3573 16.6914   1
   1  -2 -11 20.1227 10.9145   3
  -1  -2  11 19.2654 25.4881   2
   1   2 -11 10.0508 12.0821   1
  -1   2  11 18.4725 11.5460   3
   0  -2  11 61.4505 27.4488   2
   0  -2 -11 69.9440 21.4099   1
   0  -2 -11 96.1701 14.8180   3
   0   2  11 100.224 16.4462   3
   0   2 -11 87.7325 22.9514   3
   0   2 -11 74.1672 13.5709   1
  -1  -2 -11 13.3456 19.7555   1
  -1  -2 -11 18.3037 14.2019   3
   1  -2  11 -2.3441 25.1663   2
  -1   2 -11 26.4645 20.9913   3
   1   2  11 6.83191 15.7194   3
  -1   2 -11 0.65388 12.2388   1
  -2  -2 -11 24.2759 16.6930   3
   2  -2  11 -1.3216 25.2693   2
  -2  -2 -11 28.6408 21.0531   1
  -2   2 -11 10.3218 20.6983   3
  -3  -2 -11 8.26641 18.1148   3
  -3  -2 -11 -11.840 20.8356   1
   3  -2  11 -0.1149 22.4106   2
  -3   2 -11 -18.433 21.7947   3
   4  -2  11 -18.026 22.9589   2
  -4  -2 -11 -15.900 19.3536   3
  -4   2 -11 -27.306 23.2686   3
   5  -2  11 16.8777 24.4122   2
  -5  -2 -11 5.56215 21.2237   3
  -5   2 -11 -41.711 23.5806   3
  -6  -2 -11 70.8925 27.7427   3
   6  -2  11 153.341 29.1915   2
  -6   2 -11 82.9627 30.4201   3
   7  -2  11 -47.208 23.4829   2
  -7  -2 -11 -35.056 25.6057   3
  -7   2 -11 -13.138 27.3748   3
  -8  -2 -11 -14.734 29.5086   3
  -8   2 -11 27.3613 30.0945   3
  -9  -2 -11 35.0334 31.5265   3
  -9   2 -11 17.4783 30.3677   3
 -10  -2 -11 6.99062 32.8407   3
 -10   2 -11 57.8963 34.8009   3
 -11  -2 -11 222.344 43.8226   3
 -11   2 -11 124.476 40.5115   3
 -12  -2 -11 20.4309 38.6237   3
 -12   2 -11 79.1874 39.4417   3
  14  -3 -11 -10.037 32.6603   1
 -14  -3  11 -20.450 32.4445   3
 -13  -3  11 40.4605 33.9089   3
  13  -3 -11 26.1176 33.4005   1
 -12  -3  11 20.5003 36.3283   2
  12  -3 -11 32.2994 32.9924   1
 -12  -3  11 -0.5529 30.3591   3
 -11  -3  11 -63.281 26.0104   3
 -11  -3  11 -15.074 37.2013   2
  11  -3 -11 -29.044 28.8868   1
  10  -3 -11 -11.812 27.0729   1
 -10  -3  11 -26.728 26.2983   3
 -10  -3  11 -10.638 39.1542   2
  10   3 -11 -12.437 20.5846   1
  -9  -3  11 14.1796 41.4954   2
   9  -3 -11 -50.941 25.2943   1
  -9  -3  11 24.4684 26.5801   3
   9   3 -11 -19.347 19.5280   1
  -8  -3  11 41.4754 39.2955   2
   8  -3 -11 15.3307 26.4943   1
   8   3 -11 -21.755 17.2611   1
   7  -3 -11 86.4948 29.2640   1
  -7  -3  11 139.908 38.6371   2
   7   3 -11 118.821 19.6596   1
  -6  -3  11 49.6901 30.9723   2
   6  -3 -11 5.27092 23.2932   1
   6   3 -11 49.0147 14.8169   1
  -5  -3  11 -24.616 27.7735   2
   5  -3 -11 1.87417 22.8012   1
  -5  -3  11 8.14315 11.7929   1
   5   3 -11 -1.9065 11.6191   1
  -4  -3  11 14.8480 27.0942   2
   4  -3 -11 26.1100 22.3492   1
  -4  -3  11 3.73750 9.32407   1
   4   3 -11 -6.5494 10.1659   1
   3  -3 -11 17.9269 20.0542   1
  -3  -3  11 1.69446 26.5282   2
   3   3 -11 22.6819 8.86052   1
   2  -3 -11 40.0982 22.2965   1
  -2  -3  11 53.1632 26.5056   2
   1  -3 -11 75.8581 23.9186   1
  -1  -3  11 86.5913 27.1835   2
   1   3 -11 59.9607 10.2366   1
   0  -3 -11 12.3030 12.0151   3
   0  -3  11 58.8469 27.0200   2
   0  -3 -11 39.1547 21.0279   1
   0   3 -11 40.3813 10.2955   1
   0   3 -11 21.9646 22.2622   3
   1  -3  11 28.3346 25.4752   2
  -1  -3 -11 90.0327 24.5332   1
  -1  -3 -11 49.5471 15.4711   3
   1   3  11 29.9130 14.8332   3
  -1   3 -11 99.0542 13.2695   1
  -1   3 -11 24.7403 23.6085   3
  -1   3 -11 73.9966 12.4420   1
  -2  -3 -11 79.2910 25.0300   1
   2  -3  11 53.6078 24.8011   2
  -2  -3 -11 50.8217 17.6672   3
  -2   3 -11 101.018 15.6884   1
  -2   3 -11 120.887 27.4664   3
  -3  -3 -11 10.3153 18.2605   3
   3  -3  11 -4.3746 21.6467   2
  -3  -3 -11 -13.363 21.9363   1
  -3   3 -11 7.49756 23.7673   3
  -4  -3 -11 120.216 24.2057   3
  -4  -3 -11 101.726 27.6975   1
   4  -3  11 107.001 27.7308   2
  -4   3 -11 78.2093 28.3726   3
  -5  -3 -11 32.1204 23.3735   3
   5  -3  11 -25.067 23.3859   2
  -5   3 -11 -4.6036 26.7384   3
   6  -3  11 -0.3084 23.7181   2
  -6  -3 -11 11.0814 25.0167   3
  -6   3 -11 0.88087 27.9241   3
  -7  -3 -11 -8.5355 26.2982   3
   7  -3  11 -0.5900 22.3650   2
  -7   3 -11 -14.932 28.8566   3
  -8  -3 -11 21.7718 30.8635   3
  -8   3 -11 -6.1433 30.1792   3
  -9  -3 -11 28.5022 32.7691   3
  -9   3 -11 16.3298 32.9678   3
 -10  -3 -11 67.9530 36.6827   3
 -10   3 -11 43.9440 36.3819   3
 -11  -3 -11 25.1099 37.1084   3
 -11   3 -11 36.7391 38.8344   3
 -12  -3 -11 29.2420 41.2886   3
 -13  -4  11 43.1889 34.1902   3
  13  -4 -11 89.9501 36.6825   1
  12  -4 -11 -43.242 29.4156   1
 -12  -4  11 -16.662 43.5577   2
 -12  -4  11 -27.638 31.4659   3
  11  -4 -11 3.19425 29.4314   1
 -11  -4  11 4.95768 30.5930   3
 -11  -4  11 20.8516 45.3892   2
 -10  -4  11 13.7972 43.5879   2
 -10  -4  11 -6.5931 28.2653   3
  10  -4 -11 8.22114 29.2965   1
   9  -4 -11 47.5572 29.4516   1
  -9  -4  11 -16.004 35.3916   2
  -8  -4  11 82.5716 34.9230   2
   8  -4 -11 60.8217 28.4422   1
   7  -4 -11 128.733 31.6338   1
  -7  -4  11 132.319 36.5047   2
  -6  -4  11 67.4565 30.5747   2
   6  -4 -11 96.9186 29.0558   1
   5  -4 -11 74.7617 23.9754   1
  -5  -4  11 77.1575 30.7769   2
   4  -4 -11 413.372 38.2929   1
  -4  -4  11 404.796 44.1313   2
   3  -4 -11 159.628 29.7510   1
  -3  -4  11 161.602 33.3821   2
  -2  -4  11 346.398 39.8829   2
   2  -4 -11 370.507 39.3219   1
   1  -4 -11 417.497 40.7107   1
  -1  -4  11 443.777 44.0991   2
   0  -4 -11 5.00800 21.8715   1
   0  -4 -11 6.39370 12.9625   3
   0  -4  11 -37.677 23.5867   2
   1  -4  11 33.0726 24.5895   2
  -1  -4 -11 0.14574 15.4268   3
  -1  -4 -11 35.6623 22.4861   1
  -1   4 -11 4.81088 7.91811   1
  -1   4 -11 28.4220 24.9944   3
  -2  -4 -11 -21.474 16.6620   3
  -2  -4 -11 -39.359 23.4371   1
   2  -4  11 11.7021 26.1627   2
  -2   4 -11 -0.1400 24.9660   3
  -3  -4 -11 -47.456 17.6000   3
   3  -4  11 0.75297 23.8840   2
  -3  -4 -11 37.7237 25.9239   1
  -3   4 -11 -21.438 25.7331   3
   4  -4  11 32.3481 26.9060   2
  -4  -4 -11 50.6313 21.9469   3
  -4  -4 -11 16.4352 24.8660   1
  -4   4 -11 72.9225 29.7170   3
  -5  -4 -11 105.090 30.6930   1
   5  -4  11 127.098 29.3074   2
  -5  -4 -11 95.1311 26.4650   3
  -5   4 -11 118.071 32.2305   3
  -6  -4 -11 16.8597 25.6516   3
   6  -4  11 3.68570 25.0453   2
  -6  -4 -11 23.4034 26.2391   1
  -6   4 -11 -8.7615 28.9612   3
  -7  -4 -11 173.873 34.1440   3
   7  -4  11 62.3777 27.4470   2
  -7   4 -11 131.434 37.4893   3
  -8  -4 -11 20.2203 31.6154   3
  -8   4 -11 55.3832 34.6502   3
  -9  -4 -11 3.37700 35.2158   3
  -9   4 -11 17.7203 35.7431   3
 -10  -4 -11 -1.6083 35.8797   3
 -10   4 -11 54.5303 37.9069   3
 -11  -4 -11 -56.060 36.8608   3
 -11   4 -11 -12.961 38.3152   3
  12  -5 -11 7.82212 33.7409   1
 -12  -5  11 13.1270 35.3060   3
  11  -5 -11 0.07411 29.6405   1
 -11  -5  11 26.1264 45.3036   2
 -11  -5  11 46.6974 35.2819   3
 -10  -5  11 83.7008 35.7195   3
 -10  -5  11 87.1887 43.1121   2
  10  -5 -11 57.7585 33.1496   1
  -9  -5  11 87.9917 39.2113   2
   9  -5 -11 -24.583 29.9611   1
   8  -5 -11 45.6776 30.6635   1
  -8  -5  11 -8.7790 32.5598   2
   7  -5 -11 94.3292 32.5575   1
  -7  -5  11 118.400 34.8400   2
   6  -5 -11 0.09367 26.7800   1
  -6  -5  11 27.8328 31.2948   2
   5  -5 -11 2.89587 25.2131   1
  -5  -5  11 -4.2104 28.8036   2
  -4  -5  11 -7.3005 26.8593   2
   4  -5 -11 15.3377 23.4542   1
   3  -5 -11 24.7894 26.8393   1
  -3  -5  11 34.6547 28.5046   2
  -2  -5  11 13.0280 28.4163   2
   2  -5 -11 43.3270 27.7586   1
   1  -5 -11 120.520 32.1834   1
  -1  -5  11 145.356 34.3816   2
   0  -5  11 130.916 34.3769   2
   0  -5 -11 105.964 31.4433   1
   0  -5 -11 115.175 18.1948   3
   1  -5  11 62.6636 30.6693   2
  -1  -5 -11 35.9336 17.7198   3
  -1  -5 -11 -5.7421 25.9196   1
  -2  -5 -11 9.25144 25.7035   1
   2  -5  11 -9.2817 28.3163   2
  -2  -5 -11 4.33466 19.1425   3
  -2   5 -11 -13.995 26.6490   3
   3  -5  11 362.014 45.2522   2
  -3  -5 -11 335.411 33.8112   3
  -3  -5 -11 317.930 40.9733   1
  -3   5 -11 284.215 42.1362   3
  -4  -5 -11 567.333 52.1018   1
  -4  -5 -11 507.578 43.9970   3
   4  -5  11 507.503 51.4750   2
  -4   5 -11 428.824 50.5237   3
  -5  -5 -11 80.3740 26.6464   3
   5  -5  11 126.250 32.6524   2
  -5  -5 -11 39.0256 31.0844   1
  -5   5 -11 116.349 36.8154   3
  -6  -5 -11 42.6929 26.4945   3
   6  -5  11 9.50539 28.9301   2
  -6  -5 -11 8.56108 29.3425   1
  -6   5 -11 -3.3403 31.8809   3
  -7  -5 -11 19.3586 27.7757   3
   7  -5  11 5.96836 27.1302   2
  -7  -5 -11 30.7419 29.6700   1
  -7   5 -11 5.97664 33.5518   3
  -8  -5 -11 99.9239 35.4515   3
  -8  -5 -11 53.1536 30.0270   1
  -8   5 -11 -7.2187 35.8091   3
  -9  -5 -11 75.1225 37.8854   3
  -9   5 -11 13.1344 37.9400   3
 -10  -5 -11 -19.895 36.1976   3
 -10   5 -11 -47.799 37.3703   3
 -11  -6  11 74.9334 36.6753   3
  11  -6 -11 -41.030 28.6330   1
 -11  -6  11 5.92069 41.8188   2
 -10  -6  11 12.6413 38.3408   2
 -10  -6  11 -1.2890 34.2342   3
  10  -6 -11 -35.612 30.4113   1
  -9  -6  11 -1.1927 35.1534   2
   9  -6 -11 -16.093 31.6501   1
  -8  -6  11 12.9823 34.4538   2
   8  -6 -11 -37.361 29.6638   1
  -7  -6  11 36.6182 33.6919   2
   7  -6 -11 71.9677 32.9939   1
  -6  -6  11 128.731 38.1071   2
   6  -6 -11 124.995 32.5882   1
  -5  -6  11 88.0554 34.3087   2
   5  -6 -11 32.5773 28.8005   1
  -4  -6  11 -0.3105 30.2864   2
   4  -6 -11 10.2161 27.4638   1
   3  -6 -11 61.0347 29.1214   1
  -3  -6  11 27.6727 31.7615   2
   2  -6 -11 23.7487 29.0824   1
  -2  -6  11 -27.522 30.4804   2
  -1  -6  11 -33.085 28.4548   2
   1  -6 -11 25.0870 30.5671   1
   0  -6 -11 129.281 34.7629   1
   0  -6  11 63.1867 34.6274   2
   1  -6  11 49.0984 34.7657   2
  -1  -6 -11 63.8089 30.0284   1
  -2  -6 -11 10.6166 28.8710   1
   2  -6  11 51.7187 31.9137   2
  -3  -6 -11 21.9304 22.0054   3
  -3  -6 -11 16.3561 29.2233   1
   3  -6  11 4.67405 31.7137   2
   4  -6  11 53.4032 32.6463   2
  -4  -6 -11 -0.1679 23.0188   3
  -4  -6 -11 56.6243 31.4618   1
  -4   6 -11 27.9960 33.8251   3
   5  -6  11 -15.013 29.7814   2
  -5  -6 -11 11.3900 24.3327   3
  -5  -6 -11 72.3254 32.7971   1
  -5   6 -11 37.1759 35.9047   3
  -6  -6 -11 57.6114 33.3389   1
   6  -6  11 64.2031 34.2596   2
  -6  -6 -11 78.8980 29.4083   3
  -6   6 -11 9.20085 37.0101   3
  -7  -6 -11 8.12640 30.8014   3
  -7  -6 -11 18.3335 30.4696   1
   7  -6  11 34.0067 31.7011   2
  -7   6 -11 -10.501 37.9516   3
  -8  -6 -11 16.2759 32.8795   1
  -8  -6 -11 31.9583 32.6416   3
  -8   6 -11 -52.746 36.8928   3
  -9  -6 -11 35.5544 34.9936   3
  -9  -6 -11 18.3852 33.1224   1
  -9   6 -11 -17.519 40.0870   3
  10  -7 -11 -58.562 43.6940   1
 -10  -7  11 0.58245 40.4051   2
  -9  -7  11 133.704 41.3660   2
   9  -7 -11 63.7540 35.4706   1
  -8  -7  11 38.2227 34.5988   2
   8  -7 -11 34.0895 33.6687   1
   7  -7 -11 -53.874 29.8810   1
  -7  -7  11 -13.367 33.3304   2
   6  -7 -11 33.2237 30.0725   1
  -6  -7  11 -0.8466 32.4095   2
  -5  -7  11 12.4321 33.4884   2
   5  -7 -11 -14.775 28.9996   1
   4  -7 -11 12.1667 30.0222   1
  -4  -7  11 34.9782 34.3424   2
  -3  -7  11 12.0099 31.3580   2
   3  -7 -11 25.6135 29.5456   1
   2  -7 -11 48.2180 33.1102   1
  -2  -7  11 16.3088 31.6902   2
   1  -7 -11 5.39868 31.2812   1
  -1  -7  11 38.6247 37.0784   2
   0  -7  11 -1.4902 36.8528   2
   0  -7 -11 11.8033 34.3002   1
  -1  -7 -11 59.6070 35.8694   1
   1  -7  11 44.5559 35.3278   2
   2  -7  11 26.5819 33.7725   2
  -2  -7 -11 44.0181 30.8412   1
   3  -7  11 37.2489 36.2726   2
  -3  -7 -11 20.1662 32.0527   1
   4  -7  11 37.6945 35.5849   2
  -4  -7 -11 14.8798 31.9529   1
  -5  -7 -11 81.5432 31.9044   2
   5  -7  11 38.2886 36.9417   2
  -5  -7 -11 81.8485 33.8896   1
  -5   7 -11 80.0609 41.2684   3
  -6  -7 -11 140.517 39.2054   1
   6  -7  11 223.187 42.7256   2
  -6   7 -11 128.714 45.6440   3
   7  -7  11 51.3493 36.7059   2
  -7  -7 -11 67.9691 35.2856   1
  -7   7 -11 68.8301 43.2782   3
  -7  -8  11 70.8537 40.4489   2
   7  -8 -11 43.2908 35.2399   1
  -6  -8  11 -25.523 31.3939   2
   6  -8 -11 -5.2012 31.3341   1
  -5  -8  11 -21.153 33.3659   2
   5  -8 -11 5.39925 30.8734   1
   4  -8 -11 65.2869 32.5782   1
  -4  -8  11 37.6213 34.2381   2
   3  -8 -11 112.744 36.3432   1
  -3  -8  11 132.159 40.2999   2
  -2  -8  11 114.311 38.1415   2
   2  -8 -11 47.7042 33.6453   1
   1  -8 -11 99.7335 39.3318   1
  -1  -8  11 46.8692 40.7462   2
   0  -8  11 -28.272 35.6324   2
   0  -8 -11 3.36240 33.2877   1
  -1  -8 -11 -51.339 32.7600   1
   1  -8  11 -14.198 39.6790   2
  -2  -8 -11 28.7630 38.9525   1
   2  -8  11 73.5426 40.7709   2
   3  -8  11 20.5195 39.3617   2
  -3  -8 -11 22.1277 33.1226   2
  -3  -8 -11 37.1773 38.1515   1
  -4  -8 -11 41.7542 34.2661   1
   4  -8  11 -13.503 37.2118   2
  -4  -8 -11 -0.6551 28.7490   2
  -5  -8 -11 20.6036 32.8217   1
  -5  -8 -11 44.6517 36.5574   2
   5  -8  11 -36.946 36.7049   2
  15   0 -12 -3.3637 32.8885   1
  14   0 -12 117.100 33.5492   1
 -13   0  12 26.2137 27.3692   3
  13   0 -12 98.9509 32.5692   1
 -12   0  12 16.9471 25.0699   3
  12   0 -12 12.3575 26.8940   1
  11   0 -12 120.655 31.6241   1
 -11   0  12 73.2100 31.4704   2
 -11   0  12 62.9440 25.0492   3
 -10   0  12 230.127 30.1017   3
 -10   0  12 249.935 40.2518   2
  10   0 -12 257.931 34.4494   1
   9   0 -12 -16.952 21.9020   1
  -9   0  12 -1.4619 28.9911   2
  -9   0  12 30.8616 20.1664   3
  -8   0  12 177.839 24.6012   3
  -8   0  12 234.054 39.4687   2
   8   0 -12 179.825 27.3736   1
   7   0 -12 1169.69 73.9455   1
  -7   0  12 1086.15 83.9485   2
  -7   0  12 1121.53 69.7981   3
  -6   0  12 2091.47 134.077   2
   6   0 -12 2317.99 126.217   1
  -5   0  12 3137.03 197.070   2
   5   0 -12 3815.66 190.356   1
  -4   0  12 660.222 62.3743   2
   4   0 -12 615.888 50.3807   1
  -4   0  12 801.703 50.1541   3
   3   0 -12 266.898 29.8062   1
  -3   0  12 322.640 43.1673   2
  -3   0  12 348.424 27.1206   3
   2   0 -12 31.3582 17.9242   1
  -2   0  12 63.0259 31.1521   2
   1   0 -12 26.7687 17.1028   1
   1   0 -12 6.43063 16.2515   3
  -1   0  12 14.6317 31.5838   2
   0   0  12 67.2571 34.1018   2
   0   0 -12 101.056 19.0934   1
   0   0 -12 107.456 20.0245   3
   1   0  12 20.1555 29.6152   2
  -1   0 -12 21.9177 16.9313   1
  -1   0 -12 -1.6497 17.6409   3
  -2   0 -12 5.24013 19.0362   3
  -2   0 -12 42.6375 18.8355   1
   2   0  12 78.7911 29.8883   2
   3   0  12 -12.347 26.5916   2
  -3   0 -12 2.19559 20.1741   3
  -4   0 -12 25.1128 22.4204   3
   4   0  12 28.5654 25.2685   2
  -5   0 -12 37.1128 25.1094   3
   5   0  12 38.4690 23.6729   2
   6   0  12 594.856 48.8820   2
  -6   0 -12 665.032 54.0889   3
  -7   0 -12 354.920 42.6005   3
  -8   0 -12 250.896 38.6113   3
  -9   0 -12 797.303 68.5092   3
 -10   0 -12 250.671 43.0949   3
 -11   0 -12 -50.821 32.5607   3
 -12   0 -12 114.420 41.9740   3
 -15  -1  12 10.4289 34.4608   3
  15  -1 -12 -33.828 34.5111   1
  15   1 -12 -62.925 30.0147   1
  14  -1 -12 48.1626 32.2207   1
 -14  -1  12 -31.043 30.2289   3
  14   1 -12 17.3782 32.2056   1
 -13  -1  12 61.2350 31.0968   3
  13  -1 -12 9.86289 28.9361   1
 -13  -1  12 31.9564 31.0715   2
  13   1 -12 90.5632 32.3313   1
 -12  -1  12 48.5241 29.0059   3
  12  -1 -12 102.519 33.3515   1
 -12  -1  12 77.9235 34.0954   2
  12   1 -12 130.768 30.5268   1
 -11  -1  12 155.052 30.8278   3
 -11  -1  12 83.0872 34.4012   2
  11  -1 -12 142.955 33.9930   1
  11   1 -12 110.114 28.5614   1
 -11   1  12 190.163 27.8739   3
  10  -1 -12 85.4733 27.0071   1
 -10  -1  12 55.7762 25.0114   3
 -10  -1  12 101.434 35.0711   2
  10   1 -12 65.3129 26.3792   1
 -10   1  12 84.8657 22.6714   3
  -9  -1  12 45.6668 33.7061   2
   9  -1 -12 2.82651 24.8523   1
  -9  -1  12 21.3376 22.1766   3
   9   1 -12 8.06248 21.0508   1
  -9   1  12 39.9054 19.1766   3
   8  -1 -12 202.283 30.4244   1
  -8  -1  12 248.691 41.7024   2
  -8  -1  12 194.734 28.8227   3
  -8   1  12 184.783 34.6998   2
   8   1 -12 212.305 29.1372   1
  -8   1  12 235.759 24.5166   3
   7  -1 -12 12.0524 23.3454   1
  -7  -1  12 14.5412 29.8528   2
   7   1 -12 9.15837 18.5699   1
  -7   1  12 23.2000 27.4852   2
  -7   1  12 -6.4854 13.5212   3
  -6  -1  12 -24.562 27.9313   2
   6  -1 -12 1.53094 21.7603   1
  -6   1  12 -23.708 28.9734   2
   6   1 -12 4.13037 16.7880   1
  -6   1  12 21.6350 13.5221   3
   5  -1 -12 25.6481 20.9223   1
  -5  -1  12 5.49811 33.8287   2
   5   1 -12 38.2123 17.8626   1
  -5   1  12 5.18188 11.0964   3
  -5   1  12 -14.305 29.1989   2
   4  -1 -12 84.7366 21.3841   1
  -4  -1  12 150.891 38.4416   2
  -4   1  12 113.851 14.2202   3
  -4   1  12 61.9310 28.5983   2
   4   1 -12 130.030 19.9503   1
  -3  -1  12 26.2626 34.6785   2
   3  -1 -12 -14.839 17.6360   1
  -3   1  12 -1.8869 29.6200   2
  -3   1  12 25.4119 11.6994   3
   3   1 -12 -4.5265 15.4860   1
  -2  -1  12 56.3563 32.5674   2
   2  -1 -12 19.6897 18.9237   1
  -2   1  12 -21.979 27.8153   2
  -2   1  12 37.2256 12.6483   3
   2   1 -12 16.5366 15.1116   1
   1  -1 -12 210.115 25.9156   1
  -1  -1  12 98.8826 34.9975   2
   1  -1 -12 208.936 21.4617   3
   1   1 -12 214.056 22.1675   1
  -1   1  12 135.123 34.8072   2
   1   1 -12 235.040 26.6702   3
  -1   1  12 256.865 22.2545   3
   0  -1 -12 744.550 46.8024   3
   0  -1  12 527.291 60.5963   2
   0  -1 -12 687.454 49.4799   1
   0   1  12 686.268 46.4238   3
   0   1 -12 684.988 44.6371   1
   0   1  12 568.465 55.7631   2
   0   1 -12 727.948 52.6941   3
   1  -1  12 304.681 44.5590   2
  -1  -1 -12 333.404 32.4802   1
  -1  -1 -12 372.375 30.6379   3
   1   1  12 213.184 36.9392   2
  -1   1 -12 405.867 34.9142   3
  -1   1 -12 354.761 28.6332   1
  -2  -1 -12 84.2194 21.9993   1
  -2  -1 -12 74.7730 20.3292   3
   2  -1  12 45.4211 32.6595   2
   2   1  12 99.9839 29.2003   2
  -2   1 -12 62.4822 17.7923   1
  -2   1 -12 78.6664 23.3295   3
  -3  -1 -12 -22.213 19.0000   1
  -3  -1 -12 29.7433 20.3510   3
   3  -1  12 -44.087 30.4566   2
  -3   1 -12 13.6283 22.3790   3
   3   1  12 26.1377 24.8759   2
  -4  -1 -12 16.4991 21.6999   3
   4  -1  12 -2.5008 30.6784   2
  -4   1 -12 72.4183 25.6606   3
   4   1  12 41.7760 23.6316   2
   5  -1  12 -12.110 27.8706   2
  -5  -1 -12 -3.4621 22.6107   3
  -5   1 -12 40.3246 26.2557   3
   6  -1  12 74.1547 26.6491   2
  -6  -1 -12 87.6707 26.9631   3
  -6   1 -12 42.9347 27.9593   3
  -7  -1 -12 45.7071 26.8200   3
  -7   1 -12 73.3686 29.7426   3
  -8  -1 -12 -9.1632 28.1848   3
  -8   1 -12 5.53815 28.4954   3
  -9  -1 -12 2.25153 31.3471   3
  -9   1 -12 -32.094 30.2987   3
 -10  -1 -12 2.61721 32.8725   3
 -10   1 -12 20.3168 34.3857   3
 -11  -1 -12 -42.939 33.7460   3
 -11   1 -12 4.86705 34.4241   3
 -12  -1 -12 47.2234 39.9035   3
 -12   1 -12 0.25275 38.2768   3
 -14  -2  12 8.12702 31.7949   3
  14  -2 -12 7.03729 34.4285   1
  14   2 -12 23.2626 29.6273   1
 -13  -2  12 2.86727 29.1434   3
  13  -2 -12 -21.289 31.6894   1
  13   2 -12 7.09018 26.7387   1
  12  -2 -12 -11.247 31.0761   1
 -12  -2  12 12.2938 28.1109   3
 -12  -2  12 24.0248 34.2513   2
  12   2 -12 -1.0834 26.0480   1
  11  -2 -12 -11.216 28.7076   1
 -11  -2  12 32.4521 28.3773   3
 -11  -2  12 31.5434 35.0315   2
  11   2 -12 9.88351 24.2214   1
  10  -2 -12 2.07828 26.7247   1
 -10  -2  12 41.1955 33.7247   2
 -10  -2  12 14.3807 25.3874   3
  10   2 -12 44.2102 23.8029   1
  -9  -2  12 -1.5365 36.5722   2
  -9  -2  12 -18.625 24.3564   3
   9  -2 -12 -7.7537 25.8964   1
   9   2 -12 -4.9470 20.2576   1
  -8  -2  12 22.7096 37.7366   2
   8  -2 -12 29.7783 25.2530   1
  -8   2  12 39.2463 16.6866   3
   8   2 -12 9.74584 19.1174   1
  -7  -2  12 268.766 48.7563   2
   7  -2 -12 258.757 34.6915   1
  -7   2  12 343.292 25.9363   3
   7   2 -12 336.817 29.8213   1
   6  -2 -12 230.955 30.6502   1
  -6  -2  12 227.321 46.8517   2
   6   2 -12 245.185 24.9038   1
  -5  -2  12 21.0090 34.0224   2
   5  -2 -12 22.3504 20.7372   1
   5   2 -12 60.6050 16.1608   1
   4  -2 -12 283.002 31.1913   1
  -4  -2  12 288.353 23.4083   1
  -4  -2  12 252.681 43.8076   2
   4   2 -12 279.576 24.0867   1
   3  -2 -12 309.843 32.0890   1
  -3  -2  12 343.425 26.6254   1
  -3  -2  12 278.570 42.2104   2
   3   2 -12 352.582 28.3386   1
  -2  -2  12 58.0609 30.1131   2
   2  -2 -12 35.3582 20.4813   1
   2   2 -12 33.3755 13.7896   1
   1  -2 -12 323.656 26.7722   3
  -1  -2  12 377.147 43.9692   2
   1  -2 -12 346.644 34.4046   1
   1   2 -12 325.730 28.0171   1
  -1   2  12 342.780 28.7353   3
   0  -2 -12 78.3058 15.5767   3
   0  -2 -12 89.7015 22.7088   1
   0  -2  12 20.8348 28.8239   2
   0   2 -12 77.3847 14.6365   1
   0   2  12 73.2394 17.2870   3
   0   2 -12 74.0765 23.1237   3
  -1  -2 -12 23.1372 21.0722   1
  -1  -2 -12 23.7208 15.1600   3
   1  -2  12 39.3477 27.4306   2
  -1   2 -12 20.6835 23.0418   3
  -1   2 -12 26.4080 13.3786   1
  -2  -2 -12 96.6330 24.3731   1
  -2  -2 -12 59.0541 18.8290   3
   2  -2  12 37.5538 27.6686   2
  -2   2 -12 59.7071 24.3032   3
  -3  -2 -12 83.9257 25.8312   1
  -3  -2 -12 159.146 24.9080   3
   3  -2  12 156.966 32.0319   2
  -3   2 -12 167.240 29.4835   3
  -4  -2 -12 20.2296 22.5922   1
   4  -2  12 -3.1002 26.2883   2
  -4  -2 -12 -16.441 20.4654   3
  -4   2 -12 -10.155 24.4347   3
   5  -2  12 49.3656 29.9607   2
  -5  -2 -12 73.9038 24.9651   3
  -5   2 -12 -20.327 25.3330   3
  -6  -2 -12 216.424 32.3593   3
   6  -2  12 233.695 35.5816   2
  -6   2 -12 116.957 32.9626   3
   7  -2  12 328.520 44.7395   2
  -7  -2 -12 294.851 38.9207   3
  -7   2 -12 292.013 41.6592   3
  -8  -2 -12 473.567 48.3384   3
  -8   2 -12 379.225 48.6959   3
  -9  -2 -12 30.6238 31.5429   3
  -9   2 -12 -2.5105 32.1840   3
 -10  -2 -12 76.8356 35.8572   3
 -10   2 -12 50.9935 36.3853   3
 -11  -2 -12 108.103 39.8735   3
 -11   2 -12 3.75675 36.0829   3
 -12  -2 -12 28.4776 38.9509   3
 -14  -3  12 96.8779 38.0477   3
  14  -3 -12 135.296 43.8918   1
  13  -3 -12 275.786 45.5565   1
 -13  -3  12 348.398 47.4373   3
 -12  -3  12 449.067 50.0573   3
 -12  -3  12 285.153 52.1366   2
  12  -3 -12 483.539 52.4359   1
  11  -3 -12 101.190 33.1422   1
 -11  -3  12 20.5189 30.2657   3
 -11  -3  12 14.4116 40.1702   2
  11   3 -12 51.1561 24.7452   1
 -10  -3  12 63.1228 29.1826   3
  10  -3 -12 42.3761 29.8154   1
 -10  -3  12 -7.8697 40.5570   2
  10   3 -12 15.2792 21.5183   1
  -9  -3  12 13.7029 41.8313   2
   9  -3 -12 42.5549 29.6203   1
   9   3 -12 4.74481 19.0974   1
   8  -3 -12 21.1866 28.0894   1
  -8  -3  12 17.8698 40.6383   2
   8   3 -12 -29.409 16.5969   1
  -7  -3  12 96.0425 41.5986   2
   7  -3 -12 88.4456 29.4439   1
   7   3 -12 97.4195 19.3717   1
   6  -3 -12 88.3130 27.7620   1
  -6  -3  12 -14.075 30.7176   2
   6   3 -12 69.8867 15.3939   1
  -5  -3  12 -5.7992 28.6681   2
   5  -3 -12 19.6454 24.5251   1
  -5  -3  12 23.4836 11.9918   1
   5   3 -12 9.64579 12.1291   1
  -4  -3  12 82.3226 12.3913   1
  -4  -3  12 75.8072 32.2412   2
   4  -3 -12 122.583 27.1720   1
   4   3 -12 78.3960 12.7206   1
   3  -3 -12 46.4269 21.2151   1
  -3  -3  12 19.5034 28.9673   2
   3   3 -12 24.2052 9.70752   1
   2  -3 -12 63.6749 23.5231   1
  -2  -3  12 27.8989 29.3200   2
   2   3 -12 22.7925 9.41125   1
   1  -3 -12 638.867 53.7270   1
  -1  -3  12 665.544 58.8534   2
   1   3 -12 661.769 39.5741   1
   0  -3 -12 764.924 46.4046   3
   0  -3 -12 693.449 57.9355   1
   0  -3  12 740.560 62.0944   2
   0   3 -12 818.644 61.2667   3
   0   3 -12 736.859 44.5535   1
  -1  -3 -12 1410.02 83.8127   1
   1  -3  12 1260.25 85.4957   2
  -1  -3 -12 1235.33 73.8172   3
  -1   3 -12 1243.80 71.0105   1
  -1   3 -12 1271.44 84.9003   3
   2  -3  12 2812.64 161.221   2
  -2  -3 -12 2723.13 152.626   3
  -2  -3 -12 2804.68 159.200   1
  -2   3 -12 2862.34 161.259   3
   3  -3  12 563.547 50.8018   2
  -3  -3 -12 488.897 46.5051   1
  -3  -3 -12 552.336 44.6777   3
  -3   3 -12 504.487 48.1098   3
  -4  -3 -12 166.611 30.4274   1
  -4  -3 -12 160.998 26.7984   3
   4  -3  12 132.962 30.8901   2
  -4   3 -12 173.050 32.8472   3
  -5  -3 -12 231.505 30.6562   3
  -5  -3 -12 147.381 30.2238   1
   5  -3  12 125.394 31.7426   2
  -5   3 -12 132.495 33.1370   3
   6  -3  12 -21.731 25.4609   2
  -6  -3 -12 1.74704 24.9685   3
  -6   3 -12 13.4344 29.7031   3
  -7  -3 -12 -7.2772 27.5313   3
   7  -3  12 23.6382 25.8994   2
  -7   3 -12 6.07210 30.5731   3
  -8  -3 -12 30.8345 31.1149   3
  -8   3 -12 -15.103 32.2988   3
  -9  -3 -12 68.9227 35.4195   3
  -9   3 -12 2.51496 33.7451   3
 -10  -3 -12 -10.925 35.0872   3
 -10   3 -12 79.8597 37.6526   3
 -11  -3 -12 25.3912 39.4521   3
 -11   3 -12 57.0593 40.0270   3
  13  -4 -12 -4.9986 34.7420   1
 -13  -4  12 33.0265 34.3235   3
 -12  -4  12 -33.168 30.6106   3
  12  -4 -12 36.3415 33.5672   1
 -12  -4  12 75.8420 46.9659   2
 -11  -4  12 17.9639 46.7724   2
  11  -4 -12 80.2616 31.1047   1
 -11  -4  12 48.7807 32.6581   3
 -10  -4  12 -68.955 37.4591   2
 -10  -4  12 1.02844 28.3989   3
  10  -4 -12 27.2418 30.5850   1
  -9  -4  12 19.7931 37.8318   2
   9  -4 -12 -36.269 28.9732   1
  -8  -4  12 -32.619 34.7106   2
   8  -4 -12 -54.532 25.1375   1
  -7  -4  12 31.4435 34.0604   2
   7  -4 -12 6.80450 27.3332   1
  -6  -4  12 81.5347 35.2173   2
   6  -4 -12 62.2433 25.5669   1
   5  -4 -12 58.9761 26.4190   1
  -5  -4  12 58.6973 32.6202   2
   4  -4 -12 63.5961 27.5120   1
  -4  -4  12 25.8619 26.4873   2
  -3  -4  12 -14.590 29.0125   2
   3  -4 -12 47.8213 26.8615   1
   2  -4 -12 8.81381 24.2153   1
  -2  -4  12 -39.248 23.4981   2
  -1  -4  12 4.04570 27.6775   2
   1  -4 -12 15.2473 23.6564   1
   0  -4  12 -16.911 27.4105   2
   0  -4 -12 -30.620 20.7630   1
   0  -4 -12 -14.278 12.8671   3
  -1  -4 -12 14.9124 24.4215   1
   1  -4  12 7.72444 26.0106   2
  -1  -4 -12 -54.290 14.6226   3
  -1   4 -12 -6.7332 9.79053   1
  -1   4 -12 -4.9649 25.5708   3
  -2  -4 -12 2.45871 25.2302   1
  -2  -4 -12 -14.458 17.3319   3
   2  -4  12 1.27442 28.0224   2
  -2   4 -12 -4.0257 26.7885   3
  -3  -4 -12 22.8109 20.3485   3
   3  -4  12 37.9299 29.4841   2
  -3  -4 -12 30.1149 27.0721   1
  -3   4 -12 -26.251 26.0825   3
   4  -4  12 2.01967 27.1643   2
  -4  -4 -12 18.9273 21.9317   3
  -4  -4 -12 -9.5082 26.3085   1
  -4   4 -12 -12.176 27.2638   3
  -5  -4 -12 85.1630 30.1352   1
  -5  -4 -12 76.5729 26.6839   3
   5  -4  12 30.2016 28.3895   2
  -5   4 -12 45.2991 29.8722   3
  -6  -4 -12 195.085 32.4175   3
   6  -4  12 146.358 32.3061   2
  -6  -4 -12 100.008 31.6591   1
  -6   4 -12 109.163 35.9062   3
   7  -4  12 109.969 30.9291   2
  -7  -4 -12 138.227 34.0536   3
  -7  -4 -12 92.7719 31.2235   1
  -7   4 -12 148.847 39.3393   3
  -8  -4 -12 116.767 35.6671   3
  -8   4 -12 52.3883 36.9190   3
  -9  -4 -12 -26.437 33.2104   3
  -9   4 -12 25.8377 37.4636   3
 -10  -4 -12 11.3690 36.0687   3
 -10   4 -12 -53.688 35.9987   3
 -11  -4 -12 -34.420 37.0227   3
 -12  -5  12 0.76178 50.8337   2
  12  -5 -12 90.2956 34.2634   1
 -12  -5  12 9.89760 34.8852   3
  11  -5 -12 116.072 34.8628   1
 -11  -5  12 133.122 50.4185   2
 -11  -5  12 114.059 37.3609   3
  10  -5 -12 44.4115 33.6706   1
 -10  -5  12 100.340 35.8528   3
 -10  -5  12 0.86803 41.9938   2
  -9  -5  12 33.5991 37.3858   2
   9  -5 -12 45.7943 29.3964   1
   8  -5 -12 145.081 34.4825   1
  -8  -5  12 125.170 40.2163   2
   7  -5 -12 42.0446 30.1430   1
  -7  -5  12 52.3329 31.3567   2
   6  -5 -12 5.03095 27.6616   1
  -6  -5  12 1.36076 29.3554   2
   5  -5 -12 15.5367 24.9238   1
  -5  -5  12 5.52578 27.2954   2
   4  -5 -12 30.8436 27.5010   1
  -4  -5  12 -0.3908 27.2055   2
  -3  -5  12 51.4083 32.0670   2
   3  -5 -12 3.33762 27.8828   1
   2  -5 -12 5.20786 26.1326   1
  -2  -5  12 36.3867 28.1920   2
   1  -5 -12 94.2437 31.8159   1
  -1  -5  12 93.4918 33.2010   2
   0  -5 -12 407.986 45.3633   1
   0  -5  12 467.788 50.2167   2
  -1  -5 -12 191.559 24.2197   3
   1  -5  12 222.007 39.2600   2
  -1  -5 -12 279.081 38.4898   1
  -2  -5 -12 11.7856 26.7569   1
   2  -5  12 -1.2162 29.6994   2
  -2  -5 -12 27.5530 19.4035   3
  -2   5 -12 24.8241 28.8363   3
   3  -5  12 21.0713 30.4218   2
  -3  -5 -12 -35.699 24.7598   1
  -3  -5 -12 -12.678 19.9239   3
  -3   5 -12 6.77174 30.5521   3
  -4  -5 -12 136.930 34.8030   1
   4  -5  12 137.452 34.7575   2
  -4  -5 -12 135.343 27.0231   3
  -4   5 -12 94.7606 35.4395   3
  -5  -5 -12 -1.1424 28.0197   1
   5  -5  12 -32.200 26.8677   2
  -5  -5 -12 89.6406 26.3784   3
  -5   5 -12 20.3262 33.4496   3
  -6  -5 -12 42.9562 29.7962   1
  -6  -5 -12 88.3946 28.6411   3
   6  -5  12 11.7847 30.5569   2
  -6   5 -12 67.0267 35.9072   3
   7  -5  12 -24.630 26.7012   2
  -7  -5 -12 41.1306 30.2427   3
  -7  -5 -12 5.70331 28.8870   1
  -7   5 -12 2.49754 33.8302   3
  -8  -5 -12 -11.664 29.4945   1
  -8  -5 -12 -29.024 32.5050   3
  -8   5 -12 53.2214 38.1195   3
  -9  -5 -12 4.78019 31.8743   1
  -9  -5 -12 -54.680 33.2714   3
  -9   5 -12 16.5351 37.9635   3
 -10  -5 -12 -4.6051 38.6577   3
 -11  -6  12 -8.8944 35.6269   3
 -11  -6  12 -38.740 43.6942   2
  11  -6 -12 81.8155 36.7116   1
  10  -6 -12 23.4837 34.6799   1
 -10  -6  12 41.8869 43.6457   2
   9  -6 -12 -28.466 32.8243   1
  -9  -6  12 -17.455 37.2097   2
  -8  -6  12 50.8436 37.9214   2
   8  -6 -12 32.3217 32.9281   1
  -7  -6  12 302.334 45.5634   2
   7  -6 -12 206.958 39.1192   1
  -6  -6  12 432.633 51.9158   2
   6  -6 -12 436.435 46.9841   1
  -5  -6  12 469.660 56.2516   2
   5  -6 -12 537.136 51.1074   1
   4  -6 -12 117.567 34.0979   1
  -4  -6  12 94.4890 36.5382   2
  -3  -6  12 28.2051 29.8771   2
   3  -6 -12 5.77872 30.1488   1
  -2  -6  12 18.6873 28.4932   2
   2  -6 -12 18.6140 29.6152   1
   1  -6 -12 50.9615 31.8128   1
  -1  -6  12 -25.351 30.4317   2
   0  -6 -12 -9.4998 30.9328   1
   0  -6  12 -0.8952 31.8288   2
  -1  -6 -12 34.6309 29.5249   1
   1  -6  12 3.73700 33.8205   2
   2  -6  12 38.5151 33.7447   2
  -2  -6 -12 24.2895 30.8838   1
  -3  -6 -12 -13.791 30.3213   1
   3  -6  12 0.90878 33.3352   2
   4  -6  12 -40.021 30.2473   2
  -4  -6 -12 26.8242 32.0580   1
  -4   6 -12 48.1935 35.6489   3
   5  -6  12 34.2978 32.7226   2
  -5  -6 -12 -11.807 25.0401   3
  -5  -6 -12 10.2787 30.2642   1
  -5   6 -12 47.8093 37.1185   3
   6  -6  12 104.786 37.4974   2
  -6  -6 -12 111.506 30.0344   3
  -6  -6 -12 106.781 36.8890   1
  -6   6 -12 95.9906 39.3749   3
  -7  -6 -12 89.9583 32.8018   3
   7  -6  12 1.16497 31.3986   2
  -7  -6 -12 90.2853 35.3565   1
  -7   6 -12 10.1947 39.8331   3
  -8  -6 -12 139.066 37.3284   3
  -8  -6 -12 39.1941 34.5247   1
  -8   6 -12 42.7811 41.7299   3
  -9  -7  12 -27.975 37.0909   2
   9  -7 -12 -7.0466 34.9418   1
  -8  -7  12 -26.581 32.4935   2
   8  -7 -12 -39.877 30.3699   1
  -7  -7  12 8.39650 34.8099   2
   7  -7 -12 -24.440 31.1513   1
  -6  -7  12 5.54060 31.4314   2
   6  -7 -12 -15.016 30.0110   1
  -5  -7  12 12.3454 32.2519   2
   5  -7 -12 91.0120 33.3426   1
   4  -7 -12 11.3885 31.0317   1
  -4  -7  12 44.7436 35.2648   2
  -3  -7  12 -10.499 31.1584   2
   3  -7 -12 26.6967 32.0770   1
   2  -7 -12 -8.3102 33.2046   1
  -2  -7  12 -24.040 34.5420   2
  -1  -7  12 16.6123 34.7847   2
   1  -7 -12 64.2927 36.7946   1
   0  -7 -12 -20.197 32.6991   1
   0  -7  12 18.2680 34.0813   2
   1  -7  12 -14.365 34.1220   2
  -1  -7 -12 -11.025 34.6783   1
   2  -7  12 7.63217 33.4426   2
  -2  -7 -12 18.3226 32.6327   1
  -3  -7 -12 40.1412 32.6152   1
   3  -7  12 -17.992 34.7645   2
   4  -7  12 -36.886 33.6913   2
  -4  -7 -12 -1.6631 31.7277   1
  -5  -7 -12 33.0026 30.4181   2
   5  -7  12 20.7162 33.7361   2
  -5  -7 -12 4.12203 32.2533   1
  -6  -7 -12 -31.243 30.3417   1
   6  -7  12 4.68582 35.3638   2
  -6   7 -12 -53.730 36.3872   3
   7  -7  12 22.7635 53.9742   2
  -6  -8  12 52.2205 38.4496   2
   6  -8 -12 26.5468 34.2812   1
   5  -8 -12 8.06255 34.1689   1
  -5  -8  12 32.0914 37.8044   2
   4  -8 -12 47.8448 34.0560   1
  -4  -8  12 2.70179 35.7381   2
   3  -8 -12 38.9784 36.1203   1
  -3  -8  12 34.2592 38.6792   2
   2  -8 -12 1.17038 32.8047   1
  -2  -8  12 -108.38 29.5494   2
  -1  -8  12 52.5960 38.8295   2
   1  -8 -12 58.2514 36.8865   1
   0  -8 -12 8.73536 36.2319   1
   0  -8  12 1.50484 39.9449   2
  -1  -8 -12 -21.614 35.6859   1
   1  -8  12 -53.816 34.3024   2
  -2  -8 -12 1.46287 36.2506   1
   2  -8  12 -0.4516 40.1904   2
   3  -8  12 -28.645 33.5341   2
  -3  -8 -12 18.0697 38.3445   1
  -4  -8 -12 25.4213 31.9527   2
   4  -8  12 10.4069 40.9146   2
  -4  -8 -12 73.6116 37.4476   1
  14   0 -13 -37.578 29.0793   1
  13   0 -13 -15.822 29.2216   1
 -12   0  13 -2.3461 28.2926   2
  12   0 -13 -20.125 27.4852   1
 -12   0  13 -1.0242 23.9829   3
  11   0 -13 -2.3350 26.6979   1
 -11   0  13 28.5705 30.9507   2
 -11   0  13 31.8177 23.3917   3
 -10   0  13 23.2421 31.3846   2
 -10   0  13 -23.945 19.7463   3
  10   0 -13 21.6919 24.6556   1
   9   0 -13 12.1334 24.6028   1
  -9   0  13 14.7898 19.4848   3
  -9   0  13 1.13167 28.5171   2
  -8   0  13 -16.028 17.3550   3
   8   0 -13 3.72098 22.1929   1
  -8   0  13 16.2055 28.0034   2
  -7   0  13 16.4786 18.0033   3
  -7   0  13 6.13484 31.8101   2
   7   0 -13 30.8708 24.7065   1
  -6   0  13 5.15674 30.6116   2
   6   0 -13 -0.2953 21.1213   1
  -5   0  13 18.4630 28.0931   2
   5   0 -13 8.40864 21.4863   1
  -4   0  13 -18.519 31.9136   2
   4   0 -13 -1.8177 19.1329   1
  -3   0  13 28.3451 27.6567   2
   3   0 -13 -3.2744 18.3309   1
  -2   0  13 6.23884 30.1853   2
   2   0 -13 4.12059 16.8678   1
   1   0 -13 -24.840 16.1765   1
   1   0 -13 -18.656 16.5516   3
  -1   0  13 8.23925 28.8099   2
   0   0 -13 10.8992 16.8961   1
   0   0 -13 -11.157 17.5352   3
   0   0  13 -23.198 26.9389   2
  -1   0 -13 7.09805 17.8419   1
   1   0  13 -18.081 30.8001   2
  -1   0 -13 20.2269 19.6943   3
  -2   0 -13 18.9870 20.7658   3
   2   0  13 16.8410 30.1285   2
  -2   0 -13 30.5314 18.4263   1
  -3   0 -13 0.36427 18.4533   1
  -3   0 -13 8.89128 22.1890   3
   3   0  13 43.9840 27.3712   2
  -4   0 -13 -28.302 22.3101   3
   4   0  13 6.69878 24.7966   2
  -5   0 -13 -4.9467 24.6770   3
   5   0  13 -14.846 22.5739   2
  -6   0 -13 21.8977 26.3410   3
   6   0  13 -13.702 20.6317   2
  -7   0 -13 -16.554 26.8463   3
  -8   0 -13 20.4805 30.0301   3
  -9   0 -13 -48.255 30.4362   3
 -10   0 -13 -1.7115 33.2248   3
 -11   0 -13 28.7965 36.6797   3
 -14  -1  13 88.1310 34.7575   3
  14  -1 -13 61.4008 33.8801   1
  14   1 -13 66.9886 32.2112   1
 -13  -1  13 -36.686 26.8926   3
  13  -1 -13 4.59119 30.2879   1
 -13  -1  13 25.8462 31.9609   2
  13   1 -13 -0.9763 29.3818   1
  12  -1 -13 -27.070 28.6329   1
 -12  -1  13 30.1696 27.3665   3
 -12  -1  13 -2.5572 30.4430   2
  12   1 -13 -9.6762 25.0538   1
  11  -1 -13 28.7843 29.5280   1
 -11  -1  13 5.85732 31.4693   2
 -11  -1  13 18.5768 25.5374   3
  11   1 -13 23.5226 27.2088   1
  10  -1 -13 82.6236 29.5187   1
 -10  -1  13 23.0858 34.7394   2
 -10  -1  13 82.7670 26.5278   3
  10   1 -13 86.1145 27.5253   1
 -10   1  13 114.103 28.4708   3
  -9  -1  13 0.08691 22.0607   3
  -9  -1  13 21.1057 34.6876   2
   9  -1 -13 -24.679 24.1856   1
   9   1 -13 16.9558 22.1129   1
  -9   1  13 37.7681 31.2715   2
  -9   1  13 -21.664 17.0019   3
  -8  -1  13 -47.318 30.7921   2
   8  -1 -13 20.5095 26.4635   1
  -8  -1  13 23.2033 21.7061   3
   8   1 -13 6.98347 21.1173   1
  -8   1  13 10.5795 28.8079   2
  -8   1  13 -8.6098 16.1305   3
   7  -1 -13 126.092 28.0957   1
  -7  -1  13 93.7795 36.8081   2
   7   1 -13 94.3658 22.2178   1
  -7   1  13 102.013 31.4151   2
  -7   1  13 69.1679 16.3360   3
  -6  -1  13 -4.0263 29.0665   2
   6  -1 -13 10.3385 21.8941   1
  -6   1  13 -58.545 26.6190   2
   6   1 -13 25.2676 20.4781   1
  -6   1  13 -11.322 11.6362   3
  -6   1  13 7.17403 13.3764   3
  -5  -1  13 85.2990 33.9352   2
   5  -1 -13 50.1963 23.3807   1
   5   1 -13 64.6864 19.6605   1
  -5   1  13 79.2545 13.6744   3
  -5   1  13 31.8206 29.1134   2
  -4  -1  13 129.452 39.7017   2
   4  -1 -13 88.5056 22.5702   1
   4   1 -13 78.6605 20.4198   1
  -4   1  13 89.3192 31.3637   2
  -4   1  13 101.752 14.6926   3
   3  -1 -13 22.1092 19.2849   1
  -3  -1  13 11.8242 34.0495   2
  -3   1  13 53.6575 13.0735   3
  -3   1  13 -3.7480 30.5767   2
   3   1 -13 34.8736 17.2727   1
  -2  -1  13 21.4260 36.3727   2
   2  -1 -13 -9.4560 18.9114   1
  -2   1  13 6.05823 13.4783   3
   2   1 -13 -17.752 14.9759   1
  -2   1  13 0.00039 27.8553   2
  -1  -1  13 36.8185 32.7340   2
   1  -1 -13 49.5908 19.7597   1
   1  -1 -13 81.2520 16.8568   3
  -1   1  13 28.8194 28.3379   2
   1   1 -13 62.9008 21.1522   3
   1   1 -13 64.8774 16.9311   1
  -1   1  13 47.7252 16.2273   3
   0  -1 -13 938.267 59.3168   3
   0  -1 -13 993.036 62.5608   1
   0  -1  13 866.982 78.5658   2
   0   1 -13 938.473 58.2897   1
   0   1 -13 1004.93 64.8421   3
   0   1  13 767.980 69.7354   2
   1  -1  13 535.275 58.0236   2
  -1  -1 -13 622.042 44.6017   3
  -1  -1 -13 426.579 42.0116   1
  -1   1 -13 616.271 41.9494   1
   1   1  13 570.487 53.7971   2
  -1   1 -13 579.211 49.1702   3
  -2  -1 -13 -35.376 18.7669   3
  -2  -1 -13 10.4666 20.3573   1
   2  -1  13 21.1146 35.1966   2
  -2   1 -13 -3.3619 16.4222   1
   2   1  13 17.5509 27.6868   2
  -2   1 -13 52.3998 23.3253   3
  -3  -1 -13 166.729 27.7706   1
   3  -1  13 152.856 37.8077   2
  -3  -1 -13 203.050 27.3969   3
   3   1  13 149.647 31.3858   2
  -3   1 -13 198.771 30.9294   3
  -4  -1 -13 -13.379 21.5590   3
   4  -1  13 20.6525 31.6971   2
  -4   1 -13 -19.065 23.2293   3
   4   1  13 14.6662 23.8228   2
   5  -1  13 19.4998 28.1438   2
  -5  -1 -13 -19.761 23.5477   3
  -5   1 -13 -24.480 25.1424   3
   6  -1  13 26.8252 25.2611   2
  -6  -1 -13 15.2997 25.9023   3
  -6   1 -13 -4.6813 27.3160   3
  -7  -1 -13 16.7858 27.4931   3
  -7   1 -13 -12.078 27.5062   3
  -8  -1 -13 -51.514 27.5351   3
  -8   1 -13 5.59527 30.7678   3
  -9  -1 -13 -4.1866 30.9527   3
  -9   1 -13 38.1744 33.5129   3
 -10  -1 -13 17.5238 33.7884   3
 -10   1 -13 20.8900 34.3504   3
 -11  -1 -13 -47.966 35.0269   3
 -11   1 -13 -14.806 36.0131   3
  14  -2 -13 -1.9946 29.7428   1
 -14  -2  13 -37.108 30.8801   3
  14   2 -13 -20.341 29.9811   1
  13  -2 -13 -12.254 33.0569   1
 -13  -2  13 19.2419 34.5581   2
 -13  -2  13 -3.7921 29.5493   3
  13   2 -13 10.8449 27.2810   1
 -12  -2  13 35.5934 30.3717   3
  12  -2 -13 76.7783 31.7240   1
 -12  -2  13 45.2975 36.3196   2
  12   2 -13 24.8871 26.8741   1
  11  -2 -13 44.7480 30.6856   1
 -11  -2  13 0.59866 32.9267   2
 -11  -2  13 -3.9386 27.5084   3
  11   2 -13 16.1686 25.2513   1
 -10  -2  13 0.28940 36.8474   2
 -10  -2  13 87.4671 28.7775   3
  10  -2 -13 57.3426 29.6042   1
  10   2 -13 98.9296 24.2624   1
   9  -2 -13 76.3022 29.9444   1
  -9  -2  13 152.651 41.4142   2
  -9  -2  13 83.5255 27.9863   3
   9   2 -13 141.470 25.8767   1
   8  -2 -13 215.918 32.4257   1
  -8  -2  13 138.106 41.8335   2
   8   2 -13 173.596 24.8155   1
   7  -2 -13 380.435 41.3449   1
  -7  -2  13 426.486 57.6704   2
   7   2 -13 443.599 35.2859   1
   6  -2 -13 34.0817 25.8615   1
  -6  -2  13 56.2613 39.5062   2
   6   2 -13 43.5735 16.8218   1
  -5  -2  13 191.657 47.1727   2
   5  -2 -13 277.802 32.7278   1
   5   2 -13 163.115 22.0292   1
  -4  -2  13 -4.3852 36.3061   2
   4  -2 -13 15.7362 22.4408   1
   4   2 -13 21.6395 15.5648   1
  -3  -2  13 -0.0570 12.1027   1
  -3  -2  13 -12.826 28.3627   2
   3  -2 -13 12.4711 20.1581   1
   3   2 -13 1.99407 13.7540   1
  -2  -2  13 12.8861 33.9900   2
   2  -2 -13 39.3934 20.8606   1
   2   2 -13 12.8978 14.5612   1
  -1  -2  13 -31.972 30.7111   2
   1  -2 -13 18.3205 12.5279   3
   1  -2 -13 -25.651 19.7132   1
  -1   2  13 -10.844 13.7319   3
   1   2 -13 18.1584 14.2385   1
   0  -2 -13 18.4526 14.8667   3
   0  -2  13 59.9411 28.9768   2
   0  -2 -13 -5.7806 19.0456   1
   0   2 -13 6.45899 22.3610   3
   0   2 -13 2.52741 13.2209   1
   0   2  13 -5.9199 15.9821   3
   1  -2  13 67.5635 33.2168   2
  -1  -2 -13 55.2785 22.9217   1
  -1  -2 -13 66.0697 18.1939   3
  -1   2 -13 39.8308 24.5030   3
  -1   2 -13 34.8386 15.1745   1
  -2  -2 -13 25.0044 22.3317   1
   2  -2  13 10.9789 30.3060   2
  -2  -2 -13 19.3643 18.5049   3
  -2   2 -13 -11.066 22.6595   3
  -2   2 -13 35.5158 16.1161   1
  -3  -2 -13 -22.618 19.4904   3
   3  -2  13 -20.909 29.9155   2
  -3  -2 -13 29.5624 22.8077   1
  -3   2 -13 17.3027 25.1624   3
  -4  -2 -13 65.5344 23.9779   3
  -4  -2 -13 80.7462 27.4321   1
   4  -2  13 98.4205 34.3635   2
  -4   2 -13 102.250 29.4392   3
   5  -2  13 -16.719 29.5093   2
  -5  -2 -13 34.8752 24.9498   3
  -5   2 -13 -6.0526 26.6928   3
  -6  -2 -13 10.4279 26.6712   3
   6  -2  13 -38.641 28.9714   2
  -6   2 -13 26.0586 28.7085   3
  -7  -2 -13 85.3942 30.5272   3
  -7   2 -13 43.0441 32.0328   3
  -8  -2 -13 80.3413 33.7145   3
  -8   2 -13 131.978 37.6140   3
  -9  -2 -13 -4.8640 32.3496   3
  -9   2 -13 -25.018 32.9065   3
 -10  -2 -13 34.2440 34.9514   3
 -10   2 -13 56.3854 38.1945   3
 -11  -2 -13 -2.9272 37.6566   3
 -11   2 -13 32.0210 38.7669   3
 -14  -3  13 61.1477 35.5947   3
  13  -3 -13 -7.0649 33.3921   1
 -13  -3  13 37.9661 33.8169   3
 -12  -3  13 0.87620 31.5742   3
  12  -3 -13 5.73259 30.6953   1
 -12  -3  13 54.7363 40.0771   2
  11  -3 -13 -17.982 29.4852   1
 -11  -3  13 8.29584 38.8588   2
 -11  -3  13 -4.9396 28.1198   3
  11   3 -13 21.8832 24.2529   1
 -10  -3  13 -30.360 39.2756   2
  10  -3 -13 18.1704 27.0422   1
 -10  -3  13 1.22021 28.0867   3
  10   3 -13 23.4415 22.4274   1
  -9  -3  13 -35.331 41.5866   2
   9  -3 -13 32.5659 29.7627   1
   9   3 -13 -37.363 19.2115   1
   8  -3 -13 -27.184 26.6222   1
  -8  -3  13 15.9934 42.2790   2
   8   3 -13 18.9253 17.9067   1
  -7  -3  13 47.7971 38.5681   2
   7  -3 -13 -10.480 25.9374   1
   7   3 -13 3.80206 15.5234   1
  -6  -3  13 -25.640 33.6089   2
   6  -3 -13 31.3277 26.3299   1
   6   3 -13 22.9937 14.8679   1
  -5  -3  13 5.86901 29.2247   2
   5  -3 -13 -6.5608 24.9905   1
   5   3 -13 -4.8464 12.3943   1
   4  -3 -13 -11.942 24.0231   1
  -4  -3  13 45.5838 29.3707   2
   4   3 -13 20.3698 11.6536   1
   3  -3 -13 46.6588 23.9118   1
  -3  -3  13 82.7141 32.4932   2
   3   3 -13 57.2342 12.1459   1
   2  -3 -13 -38.811 22.3504   1
  -2  -3  13 -23.556 27.2427   2
   2   3 -13 -8.9041 10.0188   1
   1  -3 -13 -0.2453 23.3684   1
  -1  -3  13 84.6090 33.2225   2
   1   3 -13 28.8543 12.2087   1
   0  -3 -13 26.5783 23.6308   1
   0  -3 -13 30.5613 13.5965   3
   0  -3  13 67.1323 29.5499   2
   0   3  13 4.52429 14.7208   3
   0   3 -13 6.66004 11.4606   1
  -1  -3 -13 27.4455 16.4672   3
   1  -3  13 105.154 30.2529   2
  -1  -3 -13 23.9721 24.1579   1
  -1   3 -13 28.2052 12.6217   1
  -1   3 -13 35.7591 25.4666   3
   2  -3  13 91.3070 31.9754   2
  -2  -3 -13 158.912 22.0907   3
  -2  -3 -13 97.9651 27.4946   1
  -2   3 -13 83.0298 16.6862   1
  -2   3 -13 145.643 31.3082   3
  -3  -3 -13 114.105 28.9724   1
  -3  -3 -13 166.358 25.2643   3
   3  -3  13 169.916 35.5893   2
  -3   3 -13 116.764 30.9717   3
   4  -3  13 -16.351 26.5342   2
  -4  -3 -13 -53.460 22.4498   1
  -4  -3 -13 -18.229 21.0024   3
  -4   3 -13 18.5598 27.5600   3
   5  -3  13 18.1947 28.4869   2
  -5  -3 -13 9.64776 24.2973   3
  -5  -3 -13 -10.156 25.9693   1
  -5   3 -13 52.3022 29.8387   3
   6  -3  13 -9.6907 26.8611   2
  -6  -3 -13 4.67257 26.2963   1
  -6  -3 -13 22.7394 25.6915   3
  -6   3 -13 36.0951 30.8037   3
  -7  -3 -13 21.8690 28.8795   3
  -7   3 -13 6.33345 32.7308   3
  -8  -3 -13 17.0808 29.6776   3
  -8   3 -13 30.9753 35.3248   3
  -9  -3 -13 3.60034 33.5472   3
  -9   3 -13 -10.989 34.9460   3
 -10  -3 -13 2.16774 34.3669   3
 -10   3 -13 -14.175 37.6766   3
 -11  -3 -13 14.2020 37.6349   3
 -13  -4  13 44.6236 34.8353   3
 -12  -4  13 40.1908 44.5673   2
 -12  -4  13 73.9028 35.1775   3
  12  -4 -13 58.8744 35.1899   1
  11  -4 -13 17.2802 32.2247   1
 -11  -4  13 42.6826 48.7958   2
 -11  -4  13 39.0105 32.9054   3
  10  -4 -13 2.81382 31.6622   1
 -10  -4  13 51.2664 31.9727   3
 -10  -4  13 -22.322 44.5457   2
   9  -4 -13 -15.999 29.6839   1
  -9  -4  13 30.0032 39.4884   2
   8  -4 -13 71.4857 32.1504   1
  -8  -4  13 53.3477 37.5925   2
  -7  -4  13 335.905 50.4640   2
   7  -4 -13 263.280 39.2077   1
  -6  -4  13 94.6374 37.2965   2
   6  -4 -13 140.505 29.8480   1
  -5  -4  13 34.2234 30.4506   2
   5  -4 -13 -4.3953 26.1955   1
   4  -4 -13 -12.492 23.6828   1
  -4  -4  13 15.8648 28.3067   2
   3  -4 -13 149.779 30.2125   1
  -3  -4  13 182.499 37.5668   2
  -2  -4  13 45.5074 30.6229   2
   2  -4 -13 44.0153 26.7723   1
  -1  -4  13 22.5518 31.6436   2
   1  -4 -13 -11.134 25.5701   1
   0  -4  13 15.7262 30.2732   2
   0  -4 -13 -20.245 12.5578   3
   0  -4 -13 -0.7616 23.6346   1
   1  -4  13 83.5163 32.7825   2
  -1  -4 -13 15.8580 16.6069   3
  -1  -4 -13 -26.839 24.4998   1
  -1   4 -13 33.1152 28.5180   3
  -2  -4 -13 54.4583 28.1299   1
   2  -4  13 98.4214 31.6295   2
  -2  -4 -13 80.2373 20.6202   3
  -2   4 -13 88.8931 30.1619   3
  -3  -4 -13 91.2063 29.7427   1
  -3  -4 -13 66.8212 22.3270   3
   3  -4  13 86.3995 32.9763   2
  -3   4 -13 11.2176 29.6479   3
  -4  -4 -13 2.52063 21.1417   3
  -4  -4 -13 61.4282 29.1724   1
   4  -4  13 -20.669 29.3267   2
  -4   4 -13 -5.8222 29.1810   3
   5  -4  13 17.6380 30.5967   2
  -5  -4 -13 24.7489 24.5504   3
  -5  -4 -13 -8.1111 26.3250   1
  -5   4 -13 -50.938 27.8990   3
  -6  -4 -13 53.3543 27.8487   3
  -6  -4 -13 -24.354 25.8718   1
   6  -4  13 -24.068 27.0438   2
  -6   4 -13 34.4406 32.8729   3
  -7  -4 -13 84.9816 31.1574   1
  -7  -4 -13 94.1190 31.7080   3
  -7   4 -13 110.366 38.5260   3
  -8  -4 -13 270.595 42.7018   3
  -8  -4 -13 233.840 39.6840   1
  -8   4 -13 361.652 50.1398   3
  -9  -4 -13 38.9097 36.4642   3
  -9   4 -13 25.4714 37.4923   3
 -10  -4 -13 26.9993 37.6399   3
 -10   4 -13 2.13963 39.3366   3
 -12  -5  13 73.7774 37.0271   3
 -12  -5  13 23.5456 51.5436   2
 -11  -5  13 6.81635 47.8404   2
 -11  -5  13 92.7780 35.9041   3
  11  -5 -13 -22.465 32.1840   1
 -10  -5  13 1.80176 44.8130   2
  10  -5 -13 2.64940 32.8190   1
  -9  -5  13 -16.495 39.9549   2
   9  -5 -13 25.1918 32.5316   1
  -8  -5  13 -53.309 34.4583   2
   8  -5 -13 8.86046 32.1940   1
   7  -5 -13 2.57465 29.0436   1
  -7  -5  13 -17.624 31.0616   2
  -6  -5  13 17.3065 33.2071   2
   6  -5 -13 -27.926 28.0714   1
   5  -5 -13 -4.4738 28.0931   1
  -5  -5  13 9.71757 30.4151   2
  -4  -5  13 1.58144 27.5685   2
   4  -5 -13 -12.247 26.4051   1
   3  -5 -13 23.2578 30.0518   1
  -3  -5  13 90.7203 34.2135   2
   2  -5 -13 171.226 35.2798   1
  -2  -5  13 136.550 36.8554   2
   1  -5 -13 57.3259 32.2598   1
  -1  -5  13 98.0664 36.0891   2
   0  -5 -13 188.191 37.1807   1
   0  -5  13 158.802 38.5847   2
  -1  -5 -13 -2.4712 27.1956   1
   1  -5  13 36.8184 32.4020   2
  -2  -5 -13 91.9631 31.8038   1
   2  -5  13 99.6136 34.4719   2
  -2   5 -13 78.2184 33.0449   3
   3  -5  13 58.6417 32.2992   2
  -3  -5 -13 127.248 33.2135   1
  -3   5 -13 158.824 36.5529   3
   4  -5  13 36.5369 32.5742   2
  -4  -5 -13 13.2498 29.7504   1
  -4  -5 -13 21.7073 23.2438   3
  -4   5 -13 54.3912 33.2614   3
   5  -5  13 -18.183 30.7796   2
  -5  -5 -13 55.3086 26.4937   3
  -5  -5 -13 70.0887 32.1032   1
  -5   5 -13 15.3714 33.5483   3
  -6  -5 -13 -7.7372 27.1150   3
  -6  -5 -13 16.6396 30.4481   1
   6  -5  13 -40.537 29.7516   2
  -6   5 -13 4.59808 33.9145   3
  -7  -5 -13 31.4180 30.8219   3
  -7  -5 -13 -50.892 27.6255   1
  -7   5 -13 35.9206 36.3985   3
  -8  -5 -13 59.3076 32.3332   1
  -8  -5 -13 21.6004 32.4509   3
  -8   5 -13 28.7417 37.2914   3
  -9  -5 -13 61.9144 37.5821   3
  -9  -5 -13 2.36702 32.9553   1
  -9   5 -13 66.3463 41.2082   3
 -11  -6  13 -37.976 45.9265   2
  10  -6 -13 10.3273 36.1448   1
 -10  -6  13 -6.0239 42.8612   2
   9  -6 -13 20.6946 33.8063   1
  -9  -6  13 -5.0640 38.4291   2
  -8  -6  13 -49.416 32.5126   2
   8  -6 -13 -40.192 31.3323   1
   7  -6 -13 17.8909 31.3846   1
  -7  -6  13 -75.318 29.8514   2
  -6  -6  13 34.0996 37.0903   2
   6  -6 -13 -21.782 29.1635   1
  -5  -6  13 216.076 40.8393   2
   5  -6 -13 222.398 38.9602   1
   4  -6 -13 84.5090 32.1141   1
  -4  -6  13 11.3036 34.7245   2
  -3  -6  13 -9.0871 32.4218   2
   3  -6 -13 -46.564 29.5680   1
   2  -6 -13 -10.809 30.9300   1
  -2  -6  13 -27.879 33.3529   2
   1  -6 -13 -15.357 28.6025   1
  -1  -6  13 -5.3203 33.1920   2
   0  -6  13 15.1167 33.8861   2
   0  -6 -13 31.7095 32.5114   1
   1  -6  13 -23.096 33.2643   2
  -1  -6 -13 18.3338 34.0119   1
   2  -6  13 78.8982 36.6069   2
  -2  -6 -13 47.6090 32.9117   1
  -3  -6 -13 8.81899 31.4679   1
   3  -6  13 14.4429 34.9103   2
  -4  -6 -13 25.5693 31.1749   1
   4  -6  13 105.226 38.6097   2
  -4   6 -13 41.4745 36.9246   3
  -5  -6 -13 45.6790 32.6433   1
   5  -6  13 -0.5232 35.5451   2
  -5   6 -13 52.0327 37.6815   3
   6  -6  13 48.7629 35.7873   2
  -6  -6 -13 7.59715 32.2742   1
  -6   6 -13 48.0849 37.9961   3
  -7  -6 -13 -3.5980 32.9201   1
  -7   6 -13 51.3719 41.3226   3
  -8  -6 -13 -1.6689 46.7785   3
  -9  -7  13 14.2800 41.3275   2
   8  -7 -13 60.7740 36.2084   1
  -8  -7  13 -5.0453 36.9093   2
   7  -7 -13 7.45719 33.7226   1
  -7  -7  13 15.0633 35.7739   2
   6  -7 -13 10.8492 31.4096   1
  -6  -7  13 9.34824 36.4026   2
   5  -7 -13 104.081 34.5355   1
  -5  -7  13 5.81093 35.0573   2
  -4  -7  13 77.8949 36.1297   2
   4  -7 -13 55.3418 34.8071   1
   3  -7 -13 66.1852 35.5005   1
  -3  -7  13 33.8590 34.7376   2
  -2  -7  13 100.005 40.5500   2
   2  -7 -13 31.7835 35.5188   1
   1  -7 -13 34.2575 35.8211   1
  -1  -7  13 -24.868 34.9068   2
   0  -7 -13 111.790 40.1193   1
   0  -7  13 198.771 45.5234   2
   1  -7  13 157.575 44.2741   2
  -1  -7 -13 192.922 43.1028   1
   2  -7  13 46.8083 36.7927   2
  -2  -7 -13 19.4753 38.7636   1
   3  -7  13 63.5751 37.7466   2
  -3  -7 -13 -40.916 32.5618   1
   4  -7  13 -23.212 36.3025   2
  -4  -7 -13 -9.0608 32.8613   1
   5  -7  13 8.98942 37.7358   2
  -5  -7 -13 -9.0869 31.8567   1
  -6  -7 -13 0.85115 34.3253   1
   6  -7  13 -24.319 34.3571   2
   6  -8 -13 -5.1559 34.4408   1
  -5  -8  13 73.1153 45.1106   2
   5  -8 -13 5.28866 35.3696   1
   4  -8 -13 35.5379 34.8670   1
  -4  -8  13 12.0486 39.8275   2
   3  -8 -13 35.5242 36.7024   1
  -3  -8  13 15.2767 39.1578   2
  -2  -8  13 71.1930 39.2406   2
   2  -8 -13 61.2763 36.6462   1
   1  -8 -13 -35.112 33.6939   1
  -1  -8  13 -37.097 35.7910   2
   0  -8  13 -15.792 38.6036   2
   0  -8 -13 -16.488 37.3652   1
  -1  -8 -13 70.3109 39.9970   1
   1  -8  13 -52.384 39.2276   2
   2  -8  13 15.5423 40.4594   2
  -2  -8 -13 30.1200 39.0779   1
  -3  -8 -13 91.6010 44.7679   1
   3  -8  13 37.4552 41.3982   2
  14   0 -14 56.7311 35.4050   1
  13   0 -14 -12.667 31.4541   1
 -12   0  14 30.0146 32.5700   2
  12   0 -14 -22.950 28.1227   1
  11   0 -14 25.5840 28.3141   1
 -11   0  14 31.7862 32.7838   2
 -11   0  14 15.0086 24.0956   3
 -10   0  14 29.1569 30.8067   2
  10   0 -14 31.9258 28.0785   1
 -10   0  14 32.0085 21.0040   3
  -9   0  14 15.5674 19.2618   3
   9   0 -14 33.3947 25.1277   1
  -9   0  14 3.04326 30.4951   2
  -8   0  14 -4.7964 18.3525   3
  -8   0  14 9.87248 34.1060   2
   8   0 -14 25.8290 22.7833   1
   7   0 -14 560.358 46.0959   1
  -7   0  14 472.951 42.8128   3
  -7   0  14 502.952 53.7341   2
  -6   0  14 115.861 37.7922   2
   6   0 -14 123.230 26.3403   1
   5   0 -14 222.626 28.6083   1
  -5   0  14 253.035 43.9922   2
  -4   0  14 415.327 48.7404   2
   4   0 -14 340.423 34.6109   1
  -3   0  14 13.9156 29.7330   2
   3   0 -14 3.65166 19.0318   1
  -2   0  14 -13.510 30.7633   2
   2   0 -14 -14.873 17.0963   1
   1   0 -14 288.449 28.6176   1
  -1   0  14 341.229 44.0557   2
   1   0 -14 254.208 28.4621   3
   0   0 -14 110.065 21.9220   1
   0   0 -14 119.844 22.6679   3
   0   0  14 115.063 37.2634   2
  -1   0 -14 124.454 24.6274   3
  -1   0 -14 131.969 22.9229   1
   1   0  14 86.1184 34.0247   2
  -2   0 -14 72.1440 24.7770   3
  -2   0 -14 59.4125 21.6657   1
   2   0  14 108.346 32.1301   2
  -3   0 -14 86.4422 23.4436   1
  -3   0 -14 115.336 27.2301   3
   3   0  14 87.6989 31.2904   2
   4   0  14 633.704 56.4636   2
  -4   0 -14 577.494 50.7290   3
  -5   0 -14 155.845 31.4367   3
   5   0  14 167.411 30.1174   2
  -6   0 -14 130.418 33.9429   3
   6   0  14 220.498 30.2617   2
  -7   0 -14 12.1501 29.3559   3
  -8   0 -14 90.7736 33.8173   3
  -9   0 -14 13.8507 33.4015   3
 -10   0 -14 4.18639 34.8002   3
 -11   0 -14 8.44451 37.6273   3
  14  -1 -14 99.2367 38.2359   1
  14   1 -14 62.1462 34.1808   1
  13  -1 -14 24.2048 33.4928   1
 -13  -1  14 -10.076 27.4484   3
 -13  -1  14 9.96447 33.5228   2
  13   1 -14 -23.738 25.3318   1
 -12  -1  14 60.3677 36.2692   2
  12  -1 -14 27.9783 28.3620   1
 -12  -1  14 5.41541 25.8872   3
  12   1 -14 2.88943 26.0584   1
 -11  -1  14 51.2742 34.1587   2
 -11  -1  14 68.9310 28.2056   3
  11  -1 -14 76.0485 32.4326   1
  11   1 -14 59.6991 28.5389   1
 -10  -1  14 88.3073 26.2985   3
 -10  -1  14 69.6641 34.6652   2
  10  -1 -14 56.1235 28.9181   1
  10   1 -14 39.4497 26.5598   1
   9  -1 -14 21.2430 26.5297   1
  -9  -1  14 -5.4530 33.7718   2
  -9  -1  14 -20.745 21.6932   3
   9   1 -14 -3.3342 23.3454   1
  -9   1  14 43.9511 33.4875   2
   8  -1 -14 -0.2898 26.8994   1
  -8  -1  14 4.06800 30.8622   2
  -8   1  14 -11.515 14.8486   3
  -8   1  14 -4.8331 27.9374   2
   8   1 -14 8.58346 22.1116   1
  -7  -1  14 12.1368 37.9282   2
   7  -1 -14 86.8699 28.8228   1
   7   1 -14 100.647 23.8065   1
  -7   1  14 108.405 17.0539   3
  -7   1  14 83.9206 35.4816   2
   6  -1 -14 34.7807 25.0972   1
  -6  -1  14 -43.212 28.6313   2
   6   1 -14 38.9321 21.6639   1
  -6   1  14 56.1241 14.7691   3
  -6   1  14 0.27153 33.3870   2
  -5  -1  14 92.2101 39.3623   2
   5  -1 -14 61.7662 23.9821   1
   5   1 -14 39.3643 20.3424   1
  -5   1  14 33.0004 30.7729   2
  -5   1  14 46.6708 15.1702   3
   4  -1 -14 451.937 39.2041   1
  -4  -1  14 508.858 55.7532   2
   4   1 -14 435.978 35.1722   1
  -4   1  14 401.513 32.0123   3
  -4   1  14 347.076 47.0333   2
   3  -1 -14 1106.40 74.2441   1
  -3  -1  14 1158.94 89.3790   2
  -3   1  14 1221.55 67.2172   3
  -3   1  14 998.021 84.6167   2
   3   1 -14 1204.58 70.7405   1
   2  -1 -14 1347.35 80.5424   1
  -2  -1  14 1192.80 93.1702   2
  -2   1  14 1374.93 74.5804   3
   2   1 -14 1245.30 76.4013   1
  -2   1  14 1123.90 91.2567   2
   1  -1 -14 1497.87 84.6862   3
   1  -1 -14 1456.39 89.6786   1
  -1  -1  14 1421.94 103.209   2
   1   1 -14 1492.27 85.7069   1
   1   1 -14 1526.37 89.4927   3
  -1   1  14 1336.12 99.1102   2
   0  -1 -14 162.824 22.6763   3
   0  -1 -14 91.6291 24.1711   1
   0  -1  14 156.129 43.0504   2
   0   1 -14 171.489 26.6489   3
   0   1  14 131.176 36.0972   2
   0   1 -14 155.495 21.8020   1
   1  -1  14 69.5025 38.2986   2
  -1  -1 -14 120.515 24.6967   1
  -1  -1 -14 127.595 23.2037   3
  -1   1 -14 155.441 26.3389   3
   1   1  14 122.010 34.4431   2
  -1   1 -14 135.076 21.0597   1
   2  -1  14 -13.783 32.1868   2
  -2  -1 -14 -1.8809 21.1443   1
  -2  -1 -14 1.66576 20.5987   3
  -2   1 -14 24.0669 24.1942   3
   2   1  14 -5.1612 26.5026   2
  -2   1 -14 37.4006 18.0903   1
   3  -1  14 85.3797 35.5616   2
  -3  -1 -14 74.5845 24.4516   3
  -3  -1 -14 77.9582 24.3958   1
  -3   1 -14 64.1038 20.6325   1
   3   1  14 85.0910 30.6366   2
  -3   1 -14 87.6668 27.3238   3
   4  -1  14 14.4778 30.2713   2
  -4  -1 -14 3.53956 22.9351   3
  -4  -1 -14 -18.032 21.9132   1
  -4   1 -14 -39.484 24.2256   3
   4   1  14 9.39774 25.5986   2
   5  -1  14 38.1791 28.2365   2
  -5  -1 -14 5.78730 25.1365   3
  -5   1 -14 -6.3301 27.0697   3
  -6  -1 -14 -4.6989 26.8796   3
   6  -1  14 37.7740 25.3958   2
  -6   1 -14 18.0267 29.5171   3
  -7  -1 -14 24.8420 29.6187   3
  -7   1 -14 47.2877 31.7666   3
  -8  -1 -14 6.04197 30.5954   3
  -8   1 -14 6.44279 31.5818   3
  -9  -1 -14 6.09273 34.0412   3
  -9   1 -14 45.0316 34.5659   3
 -10  -1 -14 204.902 42.6151   3
 -10   1 -14 73.6446 38.6024   3
 -11  -1 -14 59.8332 38.9878   3
 -11   1 -14 89.6357 40.8807   3
  14  -2 -14 45.4771 37.7120   1
 -14  -2  14 -6.2510 33.5109   3
  14   2 -14 14.3537 29.9145   1
  13  -2 -14 90.8860 34.3699   1
 -13  -2  14 19.8447 31.1731   3
 -13  -2  14 41.8477 37.4957   2
  13   2 -14 89.2929 30.8490   1
  12  -2 -14 -12.052 31.0532   1
 -12  -2  14 4.50566 28.2476   3
 -12  -2  14 60.2321 36.6075   2
  12   2 -14 41.5675 27.3082   1
  11  -2 -14 102.307 30.5669   1
 -11  -2  14 75.7983 37.1935   2
 -11  -2  14 76.7153 29.7484   3
  11   2 -14 75.1538 27.7968   1
  10  -2 -14 193.687 35.5421   1
 -10  -2  14 205.098 46.4778   2
 -10  -2  14 221.094 34.7543   3
  10   2 -14 244.309 32.2788   1
  -9  -2  14 598.014 65.6680   2
   9  -2 -14 688.474 58.3106   1
  -9  -2  14 615.788 53.3372   3
   9   2 -14 667.603 52.0219   1
  -8  -2  14 545.612 62.2888   2
   8  -2 -14 611.554 52.8971   1
   8   2 -14 628.214 48.4524   1
  -7  -2  14 61.0706 36.9956   2
   7  -2 -14 10.9925 26.9046   1
   7   2 -14 22.5687 18.6468   1
  -6  -2  14 26.4126 40.0484   2
   6  -2 -14 -13.623 24.9912   1
   6   2 -14 34.0053 17.0298   1
   5  -2 -14 21.4788 23.7495   1
  -5  -2  14 -43.243 37.0474   2
   5   2 -14 -26.380 16.5009   1
  -4  -2  14 -62.627 29.5973   2
   4  -2 -14 12.8853 23.0878   1
   4   2 -14 -27.054 14.5225   1
  -3  -2  14 -43.012 36.4192   2
   3  -2 -14 37.9448 23.3548   1
   3   2 -14 37.5488 15.8433   1
   2  -2 -14 -19.948 21.2013   1
  -2  -2  14 6.70739 32.0851   2
   2   2 -14 -23.508 15.5168   1
  -2   2  14 -7.1449 12.9225   3
  -1  -2  14 55.1580 32.2972   2
   1  -2 -14 9.30164 21.8376   1
   1  -2 -14 3.43389 13.4452   3
  -1   2  14 -11.492 14.8599   3
   1   2 -14 5.67525 14.6155   1
   0  -2 -14 -1.4690 20.3739   1
   0  -2  14 13.1124 36.2986   2
   0  -2 -14 27.9023 15.7833   3
   0   2 -14 6.46077 14.6689   1
   0   2 -14 12.2663 23.5299   3
   1  -2  14 45.8259 34.0141   2
  -1  -2 -14 34.2383 18.6185   3
  -1  -2 -14 1.52736 21.6822   1
  -1   2 -14 41.9745 16.1818   1
  -1   2 -14 42.3850 25.5615   3
  -2  -2 -14 68.7271 21.1929   3
  -2  -2 -14 76.3945 25.2448   1
   2  -2  14 42.9239 36.5197   2
  -2   2 -14 65.6933 17.8979   1
  -2   2 -14 75.0700 27.1803   3
   3  -2  14 639.359 59.9924   2
  -3  -2 -14 566.767 51.0447   3
  -3  -2 -14 643.250 52.8183   1
  -3   2 -14 619.035 53.1410   3
   4  -2  14 280.238 46.0975   2
  -4  -2 -14 249.904 33.7148   3
  -4  -2 -14 303.542 38.2049   1
  -4   2 -14 402.037 41.6444   3
  -5  -2 -14 324.028 40.0604   1
   5  -2  14 223.360 42.6722   2
  -5  -2 -14 354.095 38.3547   3
  -5   2 -14 369.906 43.7484   3
   6  -2  14 497.864 55.9584   2
  -6  -2 -14 643.448 53.8551   3
  -6   2 -14 698.587 58.6647   3
  -7  -2 -14 95.3274 32.8758   3
  -7   2 -14 -10.196 30.4752   3
  -8  -2 -14 17.4301 31.9788   3
  -8   2 -14 71.0857 35.3385   3
  -9  -2 -14 52.5809 35.5969   3
  -9   2 -14 54.7218 36.6995   3
 -10  -2 -14 3.82876 35.1651   3
 -10   2 -14 8.11003 35.5325   3
 -11  -2 -14 0.76658 38.0497   3
 -13  -3  14 0.63932 31.9960   3
  13  -3 -14 42.3716 36.0196   1
 -13  -3  14 22.7272 39.6645   2
  12  -3 -14 64.4817 35.4587   1
 -12  -3  14 96.9716 42.1153   2
 -12  -3  14 118.415 35.5014   3
  11  -3 -14 81.7700 32.5427   1
 -11  -3  14 68.1707 32.8289   3
 -11  -3  14 48.4725 41.9984   2
  10  -3 -14 -63.168 29.1096   1
 -10  -3  14 11.3997 27.7877   3
 -10  -3  14 43.6192 41.5403   2
  -9  -3  14 -8.9923 41.4821   2
   9  -3 -14 -11.941 28.7886   1
   8  -3 -14 -43.169 27.4867   1
  -8  -3  14 92.9728 46.4493   2
   8   3 -14 -2.5258 19.2388   1
   7  -3 -14 49.5994 27.7657   1
  -7  -3  14 -4.9098 36.0319   2
   7   3 -14 2.57843 16.7881   1
   6  -3 -14 15.4049 27.7553   1
  -6  -3  14 81.5092 41.7838   2
   6   3 -14 96.9646 17.3471   1
  -5  -3  14 -18.512 36.3628   2
   5  -3 -14 53.7985 26.0665   1
   5   3 -14 26.0755 13.6289   1
   4  -3 -14 -8.4794 25.0433   1
  -4  -3  14 -3.7434 32.7302   2
   4   3 -14 9.14294 11.7435   1
   3  -3 -14 365.085 38.4019   1
  -3  -3  14 404.108 49.4376   2
   3   3 -14 310.209 26.7985   1
  -2  -3  14 24.2729 31.2803   2
   2  -3 -14 27.5525 24.1686   1
   2   3 -14 27.6538 11.9491   1
  -1  -3  14 98.6022 33.3463   2
   1  -3 -14 64.6172 24.8019   1
   1   3 -14 48.1679 13.9668   1
   0  -3  14 66.8135 34.0369   2
   0  -3 -14 52.9890 15.0728   3
   0  -3 -14 36.4756 22.6828   1
   0   3 -14 23.1433 12.9051   1
  -1  -3 -14 160.856 31.8546   1
  -1  -3 -14 244.576 24.4733   3
   1  -3  14 143.889 36.5164   2
  -1   3 -14 188.630 20.0538   1
  -1   3 -14 210.778 34.3818   3
  -2  -3 -14 3.18108 18.5194   3
  -2  -3 -14 21.4973 24.7201   1
   2  -3  14 67.9086 31.8076   2
  -2   3 -14 3.62531 26.7790   3
  -2   3 -14 18.6919 14.4351   1
  -3  -3 -14 56.3590 27.1111   1
  -3  -3 -14 66.4818 22.8019   3
   3  -3  14 39.6949 32.2759   2
  -3   3 -14 60.1054 29.4114   3
   4  -3  14 20.8533 32.5545   2
  -4  -3 -14 7.71608 22.4563   3
  -4  -3 -14 11.7888 26.7459   1
  -4   3 -14 -8.1062 27.2511   3
   5  -3  14 14.1288 32.5316   2
  -5  -3 -14 29.9555 25.3547   3
  -5  -3 -14 7.90575 26.1679   1
  -5   3 -14 -17.459 28.9910   3
  -6  -3 -14 77.9797 29.3493   3
  -6  -3 -14 4.92538 27.0679   1
   6  -3  14 22.5174 31.5743   2
  -6   3 -14 45.4703 33.4250   3
  -7  -3 -14 45.6866 29.6458   3
  -7   3 -14 35.3005 34.3999   3
  -8  -3 -14 4.90029 31.7965   3
  -8   3 -14 35.9710 36.4514   3
  -9  -3 -14 24.4153 36.0905   3
  -9   3 -14 -21.335 36.0342   3
 -10  -3 -14 -12.097 34.6380   3
 -10   3 -14 95.6595 43.0206   3
  12  -4 -14 54.6982 33.6553   1
 -12  -4  14 -38.355 42.7802   2
 -12  -4  14 -10.268 31.8719   3
 -11  -4  14 58.6800 48.9186   2
  11  -4 -14 122.268 35.4719   1
 -11  -4  14 131.106 36.4299   3
  10  -4 -14 330.463 46.1633   1
 -10  -4  14 178.284 51.5893   2
   9  -4 -14 383.815 46.4250   1
  -9  -4  14 308.215 56.0154   2
   8  -4 -14 239.344 39.8062   1
  -8  -4  14 275.405 54.0957   2
  -7  -4  14 96.2643 43.6429   2
   7  -4 -14 139.347 34.2273   1
   6  -4 -14 20.9179 28.5642   1
  -6  -4  14 -21.716 34.1692   2
   5  -4 -14 -14.263 26.1173   1
  -5  -4  14 -3.1505 33.3702   2
   4  -4 -14 44.0428 27.7030   1
  -4  -4  14 53.2497 32.5092   2
  -3  -4  14 92.3730 35.3142   2
   3  -4 -14 25.3249 27.1982   1
   2  -4 -14 -23.131 26.1841   1
  -2  -4  14 -15.681 27.4044   2
   1  -4 -14 -1.3147 23.6944   1
  -1  -4  14 -28.415 28.0415   2
   0  -4 -14 7.17044 24.0654   1
   0  -4  14 -17.778 31.5363   2
   1  -4  14 -28.802 30.8062   2
  -1  -4 -14 28.6369 16.3595   3
  -1  -4 -14 -8.2988 25.6818   1
  -1   4 -14 -27.866 26.4027   3
  -2  -4 -14 69.5930 28.8575   1
   2  -4  14 86.6100 36.0101   2
  -2  -4 -14 53.2640 20.2403   3
  -2   4 -14 32.3139 29.9741   3
   3  -4  14 197.387 40.4900   2
  -3  -4 -14 277.141 31.1012   3
  -3  -4 -14 293.110 40.2889   1
  -3   4 -14 274.739 41.3919   3
   4  -4  14 385.846 46.7518   2
  -4  -4 -14 271.325 40.6481   1
  -4  -4 -14 394.339 37.8295   3
  -4   4 -14 355.320 46.8856   3
  -5  -4 -14 474.268 49.1030   1
  -5  -4 -14 428.296 42.8012   3
   5  -4  14 399.116 48.9304   2
  -5   4 -14 400.839 49.6720   3
  -6  -4 -14 372.033 42.1687   3
   6  -4  14 325.824 44.6904   2
  -6  -4 -14 282.246 41.6937   1
  -6   4 -14 273.528 45.6069   3
  -7  -4 -14 28.4559 30.4941   3
  -7  -4 -14 -19.113 30.0296   1
  -7   4 -14 7.86618 35.2557   3
  -8  -4 -14 49.0343 32.6838   1
  -8  -4 -14 -8.7807 32.1285   3
  -8   4 -14 9.49374 36.3920   3
  -9  -4 -14 -36.647 33.5461   3
  -9  -4 -14 11.9547 31.4716   1
  -9   4 -14 -26.570 36.7810   3
 -10  -4 -14 -7.8900 36.0069   3
 -12  -5  14 -42.110 47.2840   2
  11  -5 -14 -30.205 33.9248   1
 -11  -5  14 -2.8702 32.1394   3
 -11  -5  14 -54.660 44.4716   2
  10  -5 -14 -5.9242 33.0974   1
 -10  -5  14 93.1359 50.5086   2
   9  -5 -14 -26.422 31.8120   1
  -9  -5  14 52.1426 45.1171   2
   8  -5 -14 52.3125 33.8159   1
  -8  -5  14 -23.702 33.6009   2
  -7  -5  14 52.8532 35.3001   2
   7  -5 -14 69.6730 32.8222   1
   6  -5 -14 23.0385 29.5926   1
  -6  -5  14 -51.384 32.9899   2
   5  -5 -14 -1.6710 28.2501   1
  -5  -5  14 -12.181 33.9951   2
   4  -5 -14 120.226 32.3401   1
  -4  -5  14 108.848 35.7344   2
  -3  -5  14 143.702 37.2982   2
   3  -5 -14 160.280 35.6422   1
   2  -5 -14 410.264 46.0097   1
  -2  -5  14 359.802 47.9097   2
   1  -5 -14 541.298 51.9781   1
  -1  -5  14 420.850 50.5647   2
   0  -5  14 16.9898 34.2711   2
   0  -5 -14 80.6517 33.5870   1
  -1  -5 -14 210.453 37.2480   1
   1  -5  14 124.835 39.2549   2
   2  -5  14 4.20904 31.1447   2
  -2  -5 -14 62.7397 30.8692   1
   3  -5  14 -23.182 33.9451   2
  -3  -5 -14 -4.3680 28.4349   1
  -3   5 -14 61.7639 34.1694   3
  -4  -5 -14 -16.860 29.1525   1
   4  -5  14 -32.935 33.6200   2
  -4   5 -14 11.5713 33.3648   3
  -5  -5 -14 2.66464 30.1279   1
   5  -5  14 -21.354 32.1578   2
  -5  -5 -14 -7.8125 24.9873   3
  -5   5 -14 33.2001 34.6391   3
   6  -5  14 -25.670 33.3281   2
  -6  -5 -14 41.0085 28.8699   3
  -6  -5 -14 -38.149 29.1445   1
  -6   5 -14 -13.285 35.2890   3
  -7  -5 -14 7.16278 29.7463   3
  -7  -5 -14 17.3513 30.4169   1
  -7   5 -14 4.86409 36.6760   3
  -8  -5 -14 -18.679 32.7389   3
  -8  -5 -14 16.3333 31.8154   1
  -8   5 -14 24.9240 38.8107   3
  -9  -5 -14 -2.3918 36.1756   3
 -10  -6  14 28.4088 44.7086   2
  10  -6 -14 -55.688 35.1810   1
   9  -6 -14 -19.287 33.1101   1
  -9  -6  14 -26.268 36.2563   2
   8  -6 -14 -23.294 32.7867   1
  -8  -6  14 -2.2262 37.6945   2
  -7  -6  14 67.0902 37.9729   2
   7  -6 -14 59.3163 33.9404   1
  -6  -6  14 -33.058 34.2416   2
   6  -6 -14 38.9690 33.2457   1
  -5  -6  14 17.0625 34.9544   2
   5  -6 -14 -2.0133 31.3578   1
  -4  -6  14 26.3014 37.5020   2
   4  -6 -14 11.2101 31.1387   1
  -3  -6  14 -61.948 32.0122   2
   3  -6 -14 24.2085 32.6729   1
  -2  -6  14 -14.746 33.3487   2
   2  -6 -14 22.8938 29.7880   1
   1  -6 -14 -27.417 31.8888   1
  -1  -6  14 42.0006 37.1623   2
   0  -6 -14 14.0546 34.5688   1
   0  -6  14 15.4840 36.1043   2
  -1  -6 -14 29.3135 36.7782   1
   1  -6  14 -11.491 35.7903   2
   2  -6  14 4.26648 35.6505   2
  -2  -6 -14 10.5146 32.3399   1
   3  -6  14 106.709 39.8660   2
  -3  -6 -14 32.7785 34.2064   1
  -4  -6 -14 51.3533 32.0375   1
   4  -6  14 80.2573 39.3474   2
  -4   6 -14 151.802 40.7759   3
  -5  -6 -14 -42.602 30.3881   1
   5  -6  14 -34.107 33.2987   2
  -5   6 -14 43.6267 39.1938   3
   6  -6  14 16.2980 35.4147   2
  -6  -6 -14 8.99887 32.7971   1
  -6   6 -14 22.1991 38.5768   3
  -7  -6 -14 -5.0143 34.9439   1
  -7   6 -14 -90.233 47.2993   3
   8  -7 -14 -48.046 32.0106   1
  -8  -7  14 -54.865 37.8167   2
  -7  -7  14 19.4616 37.2268   2
   7  -7 -14 -26.609 32.6415   1
   6  -7 -14 44.5170 34.8575   1
  -6  -7  14 -41.177 35.3601   2
   5  -7 -14 36.4076 32.8405   1
  -5  -7  14 -16.058 33.7960   2
   4  -7 -14 22.9668 34.3251   1
  -4  -7  14 59.2651 39.6086   2
   3  -7 -14 303.820 44.9309   1
  -3  -7  14 112.354 42.5967   2
  -2  -7  14 148.394 45.2572   2
   2  -7 -14 274.415 45.3848   1
   1  -7 -14 32.5324 38.4343   1
  -1  -7  14 118.300 43.4893   2
   0  -7  14 47.2782 37.8261   2
   0  -7 -14 76.2605 38.8231   1
   1  -7  14 8.06204 35.2591   2
  -1  -7 -14 -16.036 36.7460   1
   2  -7  14 -76.136 34.1536   2
  -2  -7 -14 6.87252 38.6265   1
  -3  -7 -14 -27.138 33.7378   1
   3  -7  14 27.3811 39.3819   2
  -4  -7 -14 5.44377 34.0611   1
   4  -7  14 4.26917 35.8312   2
   5  -7  14 -48.619 36.5988   2
  -5  -7 -14 -60.160 31.8098   1
   4  -8 -14 19.9409 37.3223   1
   3  -8 -14 -17.877 36.2043   1
   2  -8 -14 3.63995 37.0564   1
  -1  -8  14 27.8944 44.7868   2
   1  -8 -14 24.5611 39.7539   1
   0  -8 -14 52.8652 40.7614   1
   0  -8  14 -9.0131 43.3836   2
  -1  -8 -14 -21.622 41.2633   1
   1  -8  14 -54.947 39.6299   2
  14   0 -15 -35.600 30.9598   1
  13   0 -15 -13.372 30.3412   1
  12   0 -15 -7.3451 30.0423   1
 -12   0  15 -69.754 28.2597   2
 -11   0  15 -49.919 31.1902   2
  11   0 -15 -25.902 28.2492   1
 -10   0  15 -20.281 31.5598   2
  10   0 -15 -3.4464 24.5444   1
  -9   0  15 4.83222 31.3159   2
   9   0 -15 -10.808 25.1603   1
  -9   0  15 20.6290 18.9665   3
  -8   0  15 -5.8437 31.5692   2
  -8   0  15 13.2289 19.0337   3
   8   0 -15 41.6842 25.0504   1
  -7   0  15 14.8021 30.8277   2
   7   0 -15 -27.893 24.3782   1
  -6   0  15 -25.679 32.5766   2
   6   0 -15 -2.1305 23.7864   1
   5   0 -15 30.5607 23.1027   1
  -5   0  15 -11.367 31.0735   2
  -4   0  15 -17.073 34.7465   2
   4   0 -15 -22.089 19.8976   1
   3   0 -15 -5.9428 20.2205   1
  -3   0  15 -20.241 31.5771   2
   2   0 -15 -13.295 19.0089   1
  -2   0  15 -16.229 32.9687   2
   1   0 -15 -21.224 17.9855   1
  -1   0  15 41.6081 36.2090   2
   1   0 -15 -9.6776 19.0703   3
   0   0 -15 -7.2679 20.1842   3
   0   0 -15 -28.650 17.4011   1
   0   0  15 -41.280 30.4026   2
   1   0  15 18.3924 33.4875   2
  -1   0 -15 51.5402 20.4105   1
  -1   0 -15 20.9248 21.6660   3
  -2   0 -15 2.57395 19.8686   1
  -2   0 -15 51.8093 24.1516   3
   2   0  15 -23.428 31.2085   2
   3   0  15 -4.1778 27.4693   2
  -3   0 -15 2.82888 20.5123   1
  -3   0 -15 13.9361 24.5154   3
  -4   0 -15 10.7926 21.5604   1
  -4   0 -15 -2.0268 25.0848   3
   4   0  15 -8.6133 26.7024   2
  -5   0 -15 16.8525 28.1843   3
   5   0  15 49.3770 25.8225   2
  -6   0 -15 38.9306 29.4787   3
  -7   0 -15 15.3342 30.9335   3
  -8   0 -15 0.10924 32.6434   3
  -9   0 -15 -4.4871 33.3820   3
 -10   0 -15 -25.985 35.3105   3
  14  -1 -15 10.4650 35.3317   1
  14   1 -15 16.5174 30.3557   1
 -13  -1  15 40.9282 34.1177   2
  13  -1 -15 -5.6398 31.7989   1
  13   1 -15 22.5406 31.0180   1
 -12  -1  15 22.6642 30.2530   3
  12  -1 -15 -54.204 30.1512   1
 -12  -1  15 13.0654 35.3875   2
  12   1 -15 -3.0700 27.1565   1
 -11  -1  15 45.2024 25.3456   3
 -11  -1  15 -8.4726 34.9734   2
  11  -1 -15 41.9301 29.9479   1
  11   1 -15 121.543 31.7831   1
 -10  -1  15 -2.5273 23.5863   3
  10  -1 -15 14.7075 27.2915   1
 -10  -1  15 31.2092 36.8860   2
  10   1 -15 -1.1759 24.7964   1
   9  -1 -15 -46.668 26.9436   1
  -9  -1  15 -13.168 21.5839   3
  -9  -1  15 51.8529 36.4505   2
  -9   1  15 -10.024 33.0926   2
   9   1 -15 -3.1083 24.4566   1
  -8  -1  15 28.2088 36.6861   2
   8  -1 -15 32.6046 28.1542   1
   8   1 -15 34.7679 22.1972   1
  -8   1  15 19.2120 33.2668   2
   7  -1 -15 -29.295 26.3704   1
  -7  -1  15 -25.436 29.6151   2
   7   1 -15 26.2227 21.0761   1
  -7   1  15 39.9945 36.4956   2
   6  -1 -15 69.7353 27.0338   1
  -6  -1  15 78.0498 40.8558   2
  -6   1  15 94.0658 16.2654   3
   6   1 -15 106.760 24.3162   1
  -6   1  15 55.8920 36.3983   2
  -5  -1  15 50.1010 35.7046   2
   5  -1 -15 72.3936 25.8685   1
   5   1 -15 105.275 23.2168   1
  -5   1  15 103.009 39.3311   2
   4  -1 -15 173.484 28.6597   1
  -4  -1  15 197.297 40.8357   2
   4   1 -15 198.023 25.9969   1
  -4   1  15 178.577 41.5476   2
   3  -1 -15 340.650 36.6618   1
  -3  -1  15 475.983 55.5650   2
  -3   1  15 507.518 38.5476   3
   3   1 -15 420.829 35.8593   1
  -3   1  15 493.486 54.8152   2
   2  -1 -15 161.900 25.9044   1
  -2  -1  15 223.162 46.9212   2
   2   1 -15 156.626 23.1070   1
  -2   1  15 124.430 37.1602   2
   1  -1 -15 345.914 28.4580   3
   1  -1 -15 255.655 32.2308   1
  -1  -1  15 307.822 49.7168   2
  -1   1  15 269.720 45.7576   2
   1   1 -15 283.088 28.6441   1
   0  -1 -15 114.173 20.9723   3
   0  -1 -15 118.243 24.1642   1
   0  -1  15 111.010 36.7784   2
   0   1 -15 91.7390 25.5167   3
   0   1  15 91.8082 37.3506   2
   0   1 -15 68.4613 19.2796   1
  -1  -1 -15 3.30370 19.5259   3
  -1  -1 -15 0.65644 20.8488   1
   1  -1  15 9.20678 35.6348   2
  -1   1 -15 21.7171 23.2498   3
   1   1  15 -11.821 30.7315   2
  -1   1 -15 4.92219 17.3825   1
   2  -1  15 -3.5750 31.0250   2
  -2  -1 -15 27.9057 21.6180   3
  -2  -1 -15 6.66312 22.8026   1
  -2   1 -15 -0.4784 17.6292   1
   2   1  15 16.4806 29.2918   2
  -2   1 -15 45.9027 25.5530   3
   3  -1  15 4.82188 33.2648   2
  -3  -1 -15 18.0049 23.7777   1
  -3  -1 -15 59.8532 25.1524   3
   3   1  15 13.3835 29.2778   2
  -3   1 -15 53.3824 26.6284   3
  -3   1 -15 25.8356 20.7312   1
  -4  -1 -15 -5.1617 23.7771   3
   4  -1  15 -9.8673 30.0914   2
  -4  -1 -15 27.9375 23.7632   1
   4   1  15 -21.123 24.8529   2
  -4   1 -15 35.0019 28.4482   3
   5  -1  15 11.0460 26.9131   2
  -5  -1 -15 30.2342 24.1345   1
  -5  -1 -15 63.8196 27.8503   3
  -5   1 -15 3.09434 28.1616   3
  -6  -1 -15 3.67607 28.2611   3
  -6   1 -15 41.5598 30.9770   3
  -7  -1 -15 -4.4423 30.1253   3
  -7   1 -15 31.1135 32.9244   3
  -8  -1 -15 16.2800 32.6513   3
  -8   1 -15 6.07684 34.1537   3
  -9  -1 -15 -4.0507 34.2813   3
  -9   1 -15 3.35736 34.5245   3
 -10  -1 -15 -27.280 33.3797   3
 -10   1 -15 9.52311 37.4972   3
 -11  -1 -15 43.7543 41.7139   3
 -13  -2  15 -13.530 30.3298   3
 -13  -2  15 22.6335 37.0458   2
  13  -2 -15 18.6765 35.3792   1
  13   2 -15 8.93051 44.6380   1
 -12  -2  15 -11.081 35.8092   2
  12  -2 -15 55.0591 32.3113   1
 -12  -2  15 65.5232 30.8838   3
  12   2 -15 -7.2520 26.4179   1
 -11  -2  15 66.5985 29.9798   3
 -11  -2  15 66.4557 37.2134   2
  11  -2 -15 94.7246 32.9581   1
  11   2 -15 75.1222 28.4819   1
 -10  -2  15 135.777 32.0275   3
  10  -2 -15 170.693 36.4411   1
 -10  -2  15 133.358 41.3310   2
  10   2 -15 154.246 27.9618   1
   9  -2 -15 -13.296 30.1977   1
  -9  -2  15 -0.0349 38.8185   2
   9   2 -15 19.8234 23.0751   1
   8  -2 -15 9.60224 29.0530   1
  -8  -2  15 29.2446 40.3430   2
   8   2 -15 15.9569 20.6121   1
  -7  -2  15 9.29174 39.0382   2
   7  -2 -15 33.8647 27.9587   1
   7   2 -15 7.16311 18.7834   1
  -6  -2  15 101.661 44.2381   2
   6  -2 -15 80.5564 30.1127   1
   6   2 -15 131.065 21.0666   1
  -5  -2  15 27.9025 37.9026   2
   5  -2 -15 26.1480 25.1029   1
   5   2 -15 -9.5158 17.4310   1
   4  -2 -15 19.9580 24.5779   1
  -4  -2  15 74.1009 40.7470   2
   4   2 -15 9.61937 16.6965   1
   3  -2 -15 5.49273 22.6614   1
  -3  -2  15 9.26285 33.6337   2
   3   2 -15 14.6912 16.1348   1
  -2  -2  15 13.6840 33.1777   2
   2  -2 -15 11.7117 22.1607   1
   2   2 -15 21.7365 17.1916   1
   1  -2 -15 46.1358 23.5730   1
   1  -2 -15 55.0342 16.0242   3
  -1  -2  15 30.2933 37.9322   2
   1   2 -15 54.8876 17.1579   1
   0  -2 -15 128.164 20.3049   3
   0  -2 -15 112.878 25.8632   1
   0  -2  15 48.1402 37.1049   2
   0   2 -15 96.2334 28.0733   3
   0   2 -15 62.3475 18.0679   1
   1  -2  15 -0.0843 35.2194   2
  -1  -2 -15 -21.832 21.0164   1
  -1  -2 -15 11.5279 18.3161   3
  -1   2 -15 -22.813 24.2858   3
  -1   2 -15 -0.3062 15.7874   1
  -2  -2 -15 10.5117 23.3663   1
  -2  -2 -15 33.6461 20.8451   3
   2  -2  15 16.6702 37.1015   2
  -2   2 -15 2.94241 16.3424   1
  -2   2 -15 4.05595 25.1391   3
   3  -2  15 33.4695 39.2970   2
  -3  -2 -15 19.0669 24.3984   1
  -3  -2 -15 49.0189 23.1541   3
  -3   2 -15 52.0970 28.0457   3
  -3   2 -15 -9.6579 18.0212   1
   4  -2  15 287.468 47.7509   2
  -4  -2 -15 296.317 37.7233   1
  -4  -2 -15 322.177 36.8851   3
  -4   2 -15 353.968 42.4881   3
  -5  -2 -15 333.740 40.7209   1
  -5  -2 -15 281.296 37.8056   3
   5  -2  15 226.793 45.5221   2
  -5   2 -15 296.625 41.6518   3
  -6  -2 -15 18.0467 28.0737   3
   6  -2  15 18.2619 33.4599   2
  -6  -2 -15 -16.704 25.3104   1
  -6   2 -15 21.2415 32.1958   3
  -7  -2 -15 44.0296 31.3092   3
  -7   2 -15 22.5464 34.0004   3
  -8  -2 -15 -34.845 29.5814   3
  -8   2 -15 -26.031 33.5005   3
  -9  -2 -15 70.2240 35.9408   3
  -9   2 -15 -4.0373 34.7498   3
 -10  -2 -15 14.5903 37.2791   3
 -10   2 -15 -30.651 35.2631   3
  13  -3 -15 7.85538 33.7593   1
 -13  -3  15 40.4914 38.7194   2
 -13  -3  15 48.1697 33.3141   3
 -12  -3  15 70.8362 33.2675   3
 -12  -3  15 -42.395 36.7171   2
  12  -3 -15 79.8688 34.7641   1
 -11  -3  15 5.46017 37.2228   2
  11  -3 -15 20.4102 29.5542   1
 -11  -3  15 55.0144 30.3671   3
  10  -3 -15 27.8666 32.2236   1
 -10  -3  15 19.6039 41.1633   2
 -10  -3  15 53.1732 29.1836   3
  -9  -3  15 -24.722 42.9803   2
   9  -3 -15 -71.132 27.5432   1
  -8  -3  15 75.4936 42.7203   2
   8  -3 -15 -8.5479 30.4936   1
  -7  -3  15 90.6171 46.5685   2
   7  -3 -15 12.3977 29.4541   1
  -6  -3  15 69.8496 39.0095   2
   6  -3 -15 45.4183 28.4840   1
  -5  -3  15 -21.520 32.4772   2
   5  -3 -15 24.8305 26.7264   1
  -4  -3  15 51.6276 36.3621   2
   4  -3 -15 15.7973 27.1778   1
  -3  -3  15 41.1336 33.7172   2
   3  -3 -15 62.4240 26.6577   1
   3   3 -15 5.30230 15.2290   1
   2  -3 -15 42.4028 26.0438   1
  -2  -3  15 22.7553 34.9180   2
   2   3 -15 44.6044 13.9832   1
  -1  -3  15 -7.3994 31.0780   2
   1  -3 -15 -7.6212 23.4879   1
   1   3 -15 7.71283 13.6351   1
   0  -3 -15 15.3687 24.7382   1
   0  -3 -15 30.1970 15.5689   3
   0  -3  15 5.05779 32.3283   2
   0   3 -15 -15.391 12.8999   1
   1  -3  15 31.0440 35.2531   2
  -1  -3 -15 59.9864 27.6419   1
  -1  -3 -15 34.6617 18.2028   3
  -1   3 -15 40.5237 14.7259   1
  -1   3 -15 49.2549 28.8557   3
  -2  -3 -15 6.99563 25.7842   1
  -2  -3 -15 10.7761 19.5154   3
   2  -3  15 18.0277 34.0433   2
  -2   3 -15 32.8398 28.3104   3
  -2   3 -15 22.2950 14.9322   1
   3  -3  15 -40.465 31.1557   2
  -3  -3 -15 -25.177 19.8883   3
  -3  -3 -15 -8.9784 24.3975   1
  -3   3 -15 12.3729 28.5945   3
  -3   3 -15 -9.7055 15.4603   1
   4  -3  15 -47.075 33.2992   2
  -4  -3 -15 23.0658 27.0815   1
  -4  -3 -15 21.4393 23.6913   3
  -4   3 -15 -14.077 28.6610   3
   5  -3  15 -35.320 33.9133   2
  -5  -3 -15 5.90017 25.7105   3
  -5  -3 -15 -8.9553 27.3926   1
  -5   3 -15 24.0469 31.3581   3
  -6  -3 -15 -0.0745 27.9114   3
   6  -3  15 5.15493 35.3934   2
  -6  -3 -15 4.25418 27.4073   1
  -6   3 -15 18.3468 33.3118   3
  -7  -3 -15 -4.6810 28.6791   1
  -7  -3 -15 40.3778 31.0842   3
  -7   3 -15 2.52707 33.7822   3
  -8  -3 -15 -11.237 32.7687   3
  -8   3 -15 -31.777 34.3064   3
  -9  -3 -15 9.74379 35.7502   3
  -9   3 -15 -0.9119 37.2484   3
 -10  -3 -15 71.0469 39.2966   3
  12  -4 -15 78.8048 34.7651   1
 -12  -4  15 4.78779 45.9961   2
 -12  -4  15 55.7660 35.1937   3
  11  -4 -15 30.6410 35.5428   1
 -11  -4  15 35.5894 32.0905   3
 -11  -4  15 40.0400 47.8244   2
  10  -4 -15 13.3862 36.0531   1
 -10  -4  15 81.1154 49.0431   2
   9  -4 -15 -4.9715 32.0857   1
  -9  -4  15 21.4635 41.7702   2
  -8  -4  15 188.908 50.0966   2
   8  -4 -15 120.768 38.6504   1
   7  -4 -15 36.6577 30.1693   1
  -7  -4  15 -31.036 36.5720   2
  -6  -4  15 43.5989 39.7127   2
   6  -4 -15 29.8243 26.8122   1
   5  -4 -15 1.05713 27.1817   1
  -5  -4  15 10.1864 34.1706   2
   4  -4 -15 59.2139 30.1160   1
  -4  -4  15 -22.396 34.6307   2
  -3  -4  15 1.55692 34.9880   2
   3  -4 -15 74.5707 28.8356   1
  -2  -4  15 13.6763 36.5754   2
   2  -4 -15 -19.176 26.3444   1
   1  -4 -15 25.0814 27.0811   1
  -1  -4  15 18.7872 36.7267   2
   0  -4 -15 0.30944 24.8897   1
   0  -4  15 -8.6127 35.1255   2
   1  -4  15 89.0797 37.8956   2
  -1  -4 -15 87.2945 28.6845   1
   2  -4  15 92.5241 38.0396   2
  -2  -4 -15 61.6248 30.4621   1
  -2   4 -15 4.34023 30.3404   3
  -3  -4 -15 -0.1429 27.8157   1
   3  -4  15 33.0932 36.8668   2
  -3  -4 -15 28.2979 22.1782   3
  -3   4 -15 60.4550 32.3564   3
  -4  -4 -15 96.7136 26.5929   3
  -4  -4 -15 108.467 32.8052   1
   4  -4  15 66.7265 38.3670   2
  -4   4 -15 118.006 37.1499   3
  -5  -4 -15 5.09091 29.7903   1
   5  -4  15 6.37284 35.5431   2
  -5  -4 -15 80.5039 27.3986   3
  -5   4 -15 60.7358 34.0554   3
  -6  -4 -15 62.2194 30.7188   3
  -6  -4 -15 67.7062 32.6336   1
   6  -4  15 47.2037 37.2841   2
  -6   4 -15 65.1791 35.2034   3
  -7  -4 -15 182.087 37.5750   3
  -7  -4 -15 189.677 39.0693   1
  -7   4 -15 213.468 44.5555   3
  -8  -4 -15 28.3374 32.5936   3
  -8  -4 -15 -22.182 29.7478   1
  -8   4 -15 25.4627 38.5099   3
  -9  -4 -15 -35.620 33.9270   3
  11  -5 -15 20.5389 42.6800   1
 -11  -5  15 30.1114 32.7430   3
 -11  -5  15 63.1694 53.1714   2
 -10  -5  15 11.1407 48.9196   2
  10  -5 -15 -34.684 34.0615   1
  -9  -5  15 -44.731 41.0465   2
   9  -5 -15 6.33691 34.0854   1
  -8  -5  15 -16.416 41.0266   2
   8  -5 -15 12.7179 33.1573   1
   7  -5 -15 89.4845 34.5798   1
  -7  -5  15 69.9312 39.8900   2
   6  -5 -15 31.8869 31.4010   1
  -6  -5  15 -39.131 34.4719   2
   5  -5 -15 43.3225 30.2119   1
  -5  -5  15 -12.583 33.2294   2
   4  -5 -15 174.488 37.1644   1
  -4  -5  15 58.3333 38.8793   2
  -3  -5  15 263.444 45.6956   2
   3  -5 -15 175.385 35.6876   1
  -2  -5  15 253.598 48.5664   2
   2  -5 -15 234.889 40.6901   1
  -1  -5  15 31.2453 37.1055   2
   1  -5 -15 -16.844 30.4915   1
   0  -5  15 21.2894 36.6095   2
   0  -5 -15 -5.4283 31.0472   1
  -1  -5 -15 -29.760 27.2276   1
   1  -5  15 -9.7588 35.9580   2
[truncated: 75,878 more chars]
